# Supplementary material for: GC-MS analysis, phytochemical composition of Hertia cheirifolia L. essential oil with pharmacological assessments: antioxidant, antibacterial, and antifungal activities
Source: Royal Society of Chemistry journal article supplement (doi:10.1039/d4ra03578j), 2024-01-01

## Technical platform of physico chemical analyses of Laghouat (TPPCA-CRAPC)

Email: [ptapc.laghouat@gmail.com](mailto:ptapc.laghouat@gmail.com)

Library

<< Target >>

Line#:1 R.Time:8.625(Scan#:1166) Retention Index:927 MassPeaks:339

RawMode:Averaged 8.480-8.740(1137-1189) BasePeak:93.10(741153)

BG Mode:Calc. from Peak Group 1 - Event 1 Scan

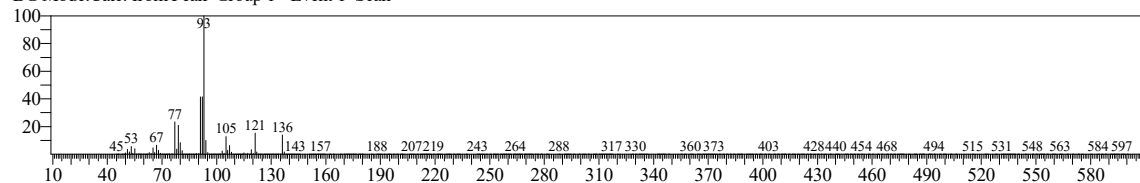

Hit#:1 Entry:40178 Library:W11N17MAIN1.lib

SI:96 Formula:C10H16 CAS:80-56-8 MolWeight:136 RetIndex:948

CompName:2-Pinene

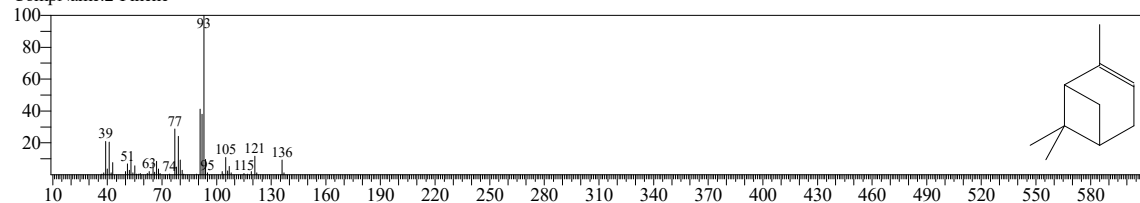

Hit#:2 Entry:817 Library:FFNSC 1.2.lib

SI:96 Formula:C10H16 CAS:80-56-8 MolWeight:136 RetIndex:933

CompName:Pinene <alpha->; Bicyclo(3.1.1)hept-3-ene <2,6,6-trimethyl->

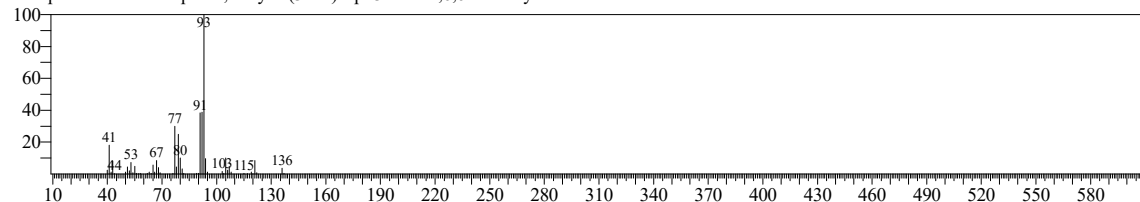

Hit#:3 Entry:40177 Library:W11N17MAIN1.lib

SI:96 Formula:C10H16 CAS:80-56-8 MolWeight:136 RetIndex:948

CompName:2-Pinene

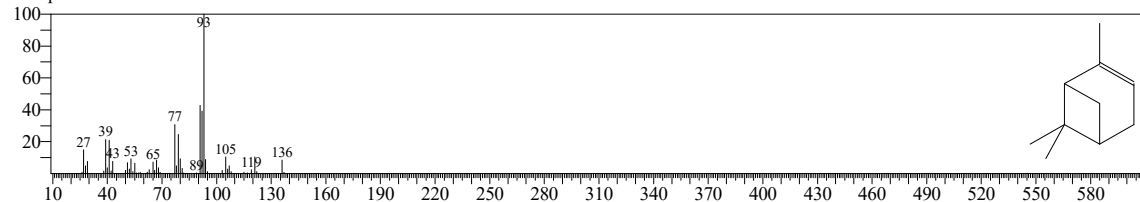

<< Target >>

Line#:1 R.Time:8.625(Scan#:1166) Retention Index:927 MassPeaks:339

RawMode:Averaged 8.480-8.740(1137-1189) BasePeak:93.10(741153)

BG Mode:Calc. from Peak Group 1 - Event 1 Scan

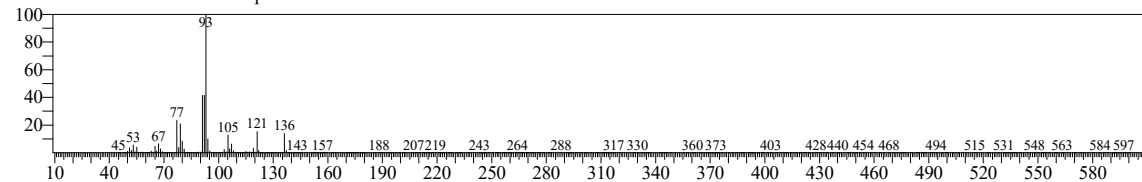

Hit#:4 Entry:18415 Library:NIST17.lib

SI:96 Formula:C10H16 CAS:488-97-1 MolWeight:136 RetIndex:729

CompName:Tricyclo[2.2.1.0(2,6)]heptane, 1,3,3-trimethyl-

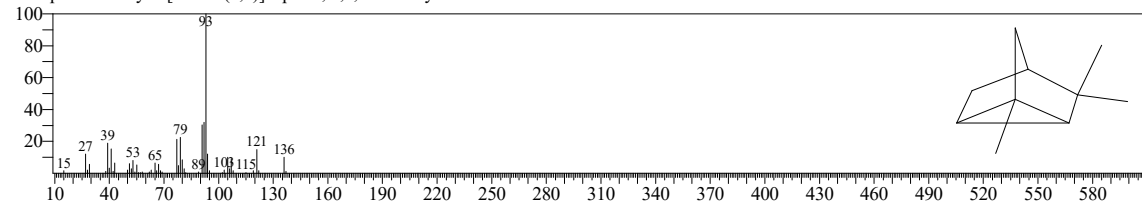

Hit#:5 Entry:40362 Library:W11N17MAIN1.lib

SI:96 Formula:C10H16 CAS:488-97-1 MolWeight:136 RetIndex:729

CompName:Tricyclo[2.2.1.0(2,6)]heptane, 1,3,3-trimethyl-

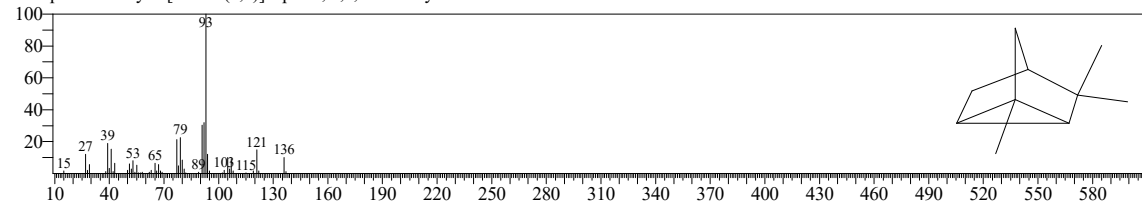

Hit#:6 Entry:18281 Library:NIST17.lib

SI:95 Formula:C10H16 CAS:7785-70-8 MolWeight:136 RetIndex:948

CompName:(1R)-2,6,6-Trimethylbicyclo[3.1.1]hept-2-ene

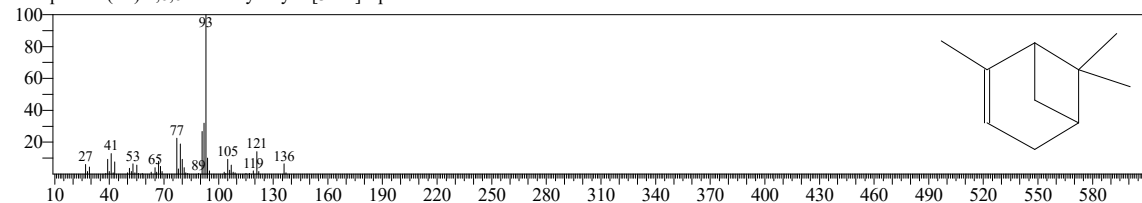

Hit#:7 Entry:40183 Library:W11N17MAIN1.lib

SI:95 Formula:C10H16 CAS:7785-70-8 MolWeight:136 RetIndex:948

CompName:(1R)-2,6,6-Trimethylbicyclo[3.1.1]hept-2-ene

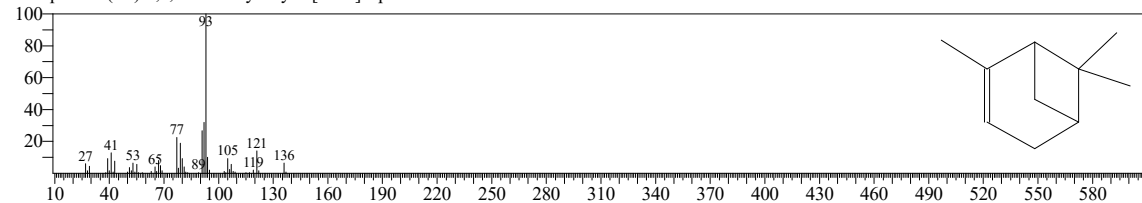

<< Target >>

Line#:1 R.Time:8.625(Scan#:1166) Retention Index:927 MassPeaks:339

RawMode:Averaged 8.480-8.740(1137-1189) BasePeak:93.10(741153)

BG Mode:Calc. from Peak Group 1 - Event 1 Scan

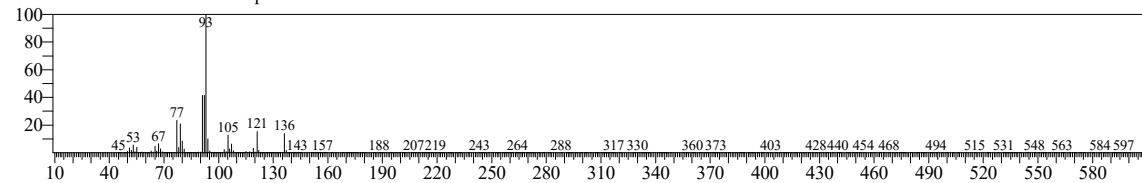

Hit#:8 Entry:18417 Library:NIST17.lib

SI:95 Formula:C10H16 CAS:80-56-8 MolWeight:136 RetIndex:948

CompName:alpha.-Pinene

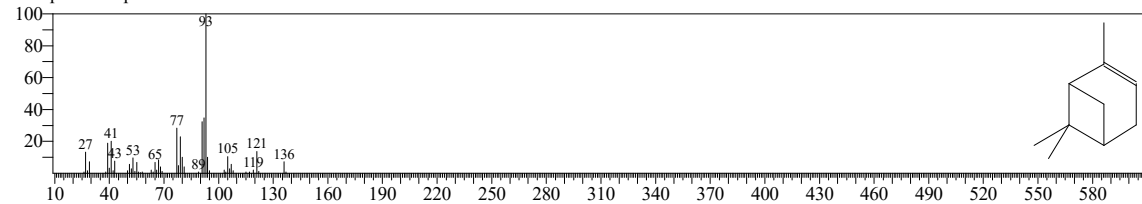

Hit#:9 Entry:40180 Library:W11N17MAIN1.lib

SI:95 Formula:C10H16 CAS:80-56-8 MolWeight:136 RetIndex:948

CompName:alpha.-Pinene

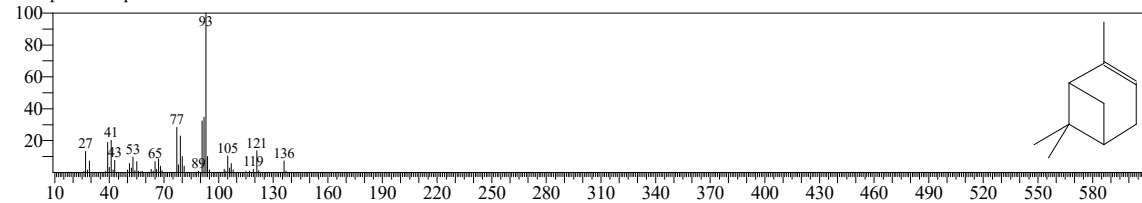

Hit#:10 Entry:40175 Library:W11N17MAIN1.lib

SI:95 Formula:C10H16 CAS:80-56-8 MolWeight:136 RetIndex:948

CompName:2-Pinene

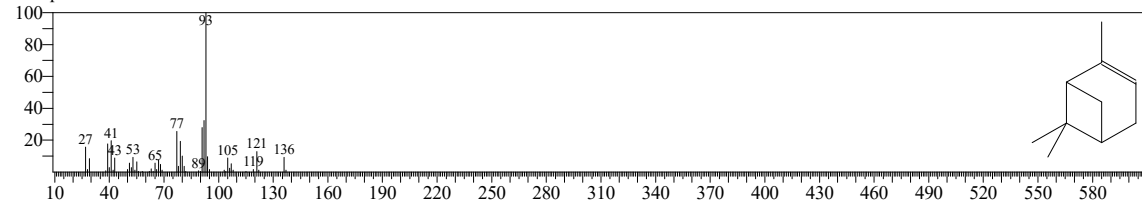

<< Target >>

Line#:2 R.Time:9.120(Scan#:1265) Retention Index:939 MassPeaks:302

RawMode:Averaged 9.060-9.200(1253-1281) BasePeak:93.05(12313)

BG Mode:Calc. from Peak Group 1 - Event 1 Scan

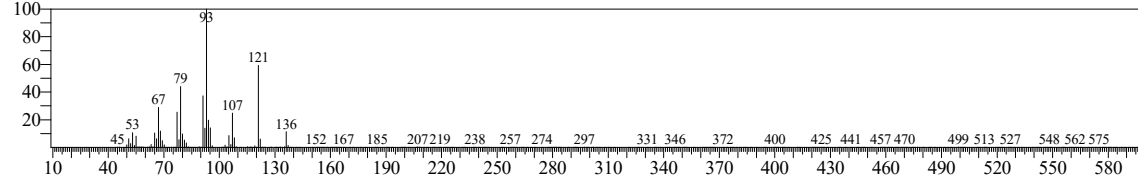

Hit#:1 Entry:18284 Library:NIST17.lib

SI:97 Formula:C<sub>10</sub>H<sub>16</sub> CAS:79-92-5 MolWeight:136 RetIndex:943

CompName:Camphene

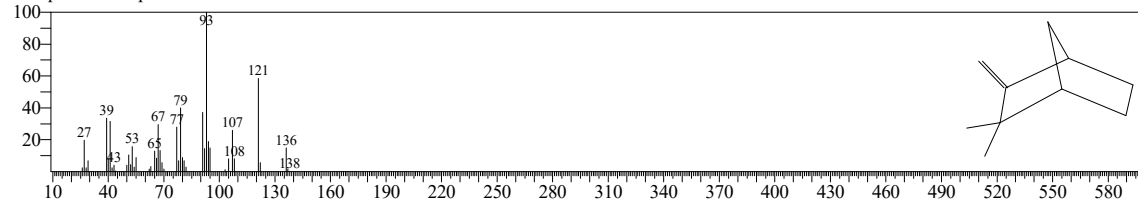

Hit#:2 Entry:40107 Library:W11N17MAIN1.lib

SI:97 Formula:C<sub>10</sub>H<sub>16</sub> CAS:79-92-5 MolWeight:136 RetIndex:943

CompName:Camphene

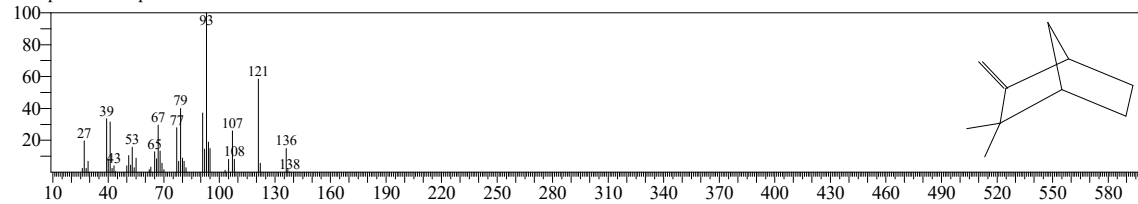

Hit#:3 Entry:40111 Library:W11N17MAIN1.lib

SI:97 Formula:C<sub>10</sub>H<sub>16</sub> CAS:79-92-5 MolWeight:136 RetIndex:943

CompName:Bicyclo[2.2.1]heptane, 2,2-dimethyl-3-methylene-

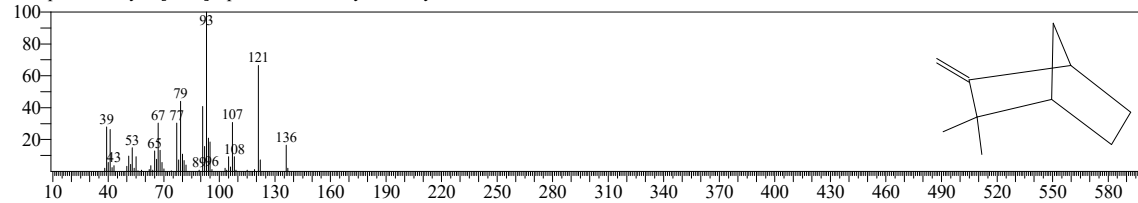

Hit#:4 Entry:952 Library:FFNSC 1.2.lib

SI:96 Formula:C<sub>10</sub>H<sub>16</sub> CAS:79-92-5 MolWeight:136 RetIndex:953

CompName:Camphene; Bicyclo[2.2.1]heptane <2,2-dimethyl-, 3-methylene->

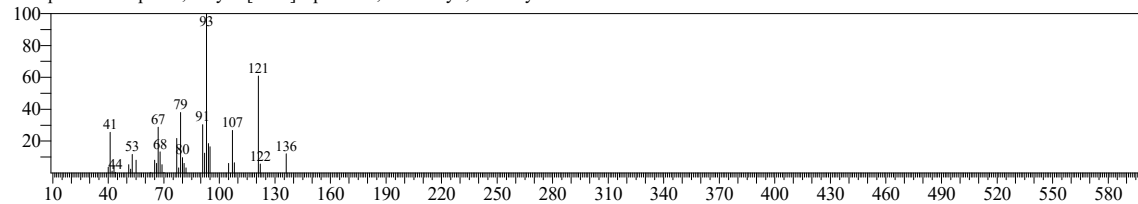

<< Target >>

Line#:2 R.Time:9.120(Scan#:1265) Retention Index:939 MassPeaks:302

RawMode:Averaged 9.060-9.200(1253-1281) BasePeak:93.05(12313)

BG Mode:Calc. from Peak Group 1 - Event 1 Scan

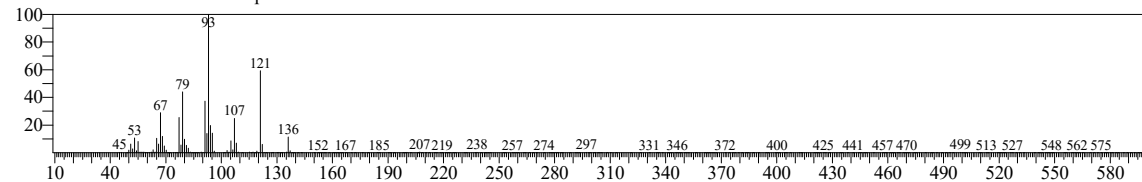

Hit#:5 Entry:18420 Library:NIST17.lib

SI:95 Formula:C10H16 CAS:79-92-5 MolWeight:136 RetIndex:943

CompName:Camphene

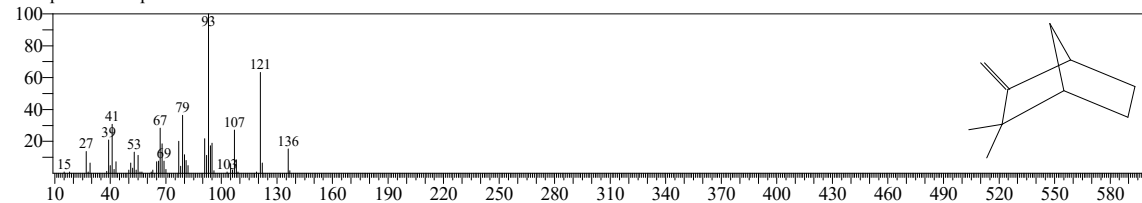

Hit#:6 Entry:40104 Library:W11N17MAIN1.lib

SI:95 Formula:C10H16 CAS:79-92-5 MolWeight:136 RetIndex:943

CompName:Camphene

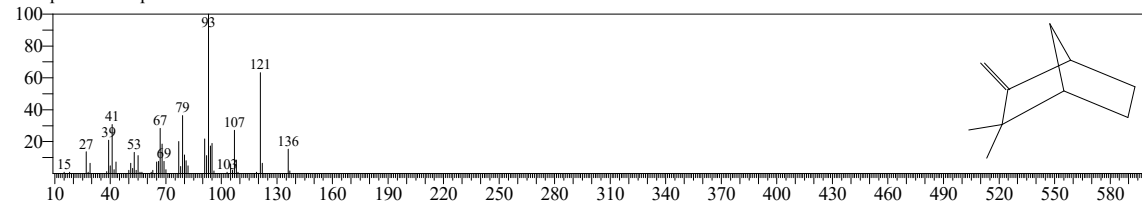

Hit#:7 Entry:18282 Library:NIST17.lib

SI:95 Formula:C10H16 CAS:5794-04-7 MolWeight:136 RetIndex:943

CompName:Bicyclo[2.2.1]heptane, 2,2-dimethyl-3-methylene-, (1S)-

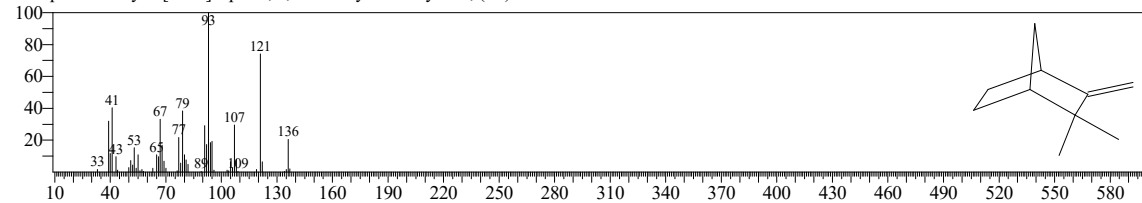

Hit#:8 Entry:40109 Library:W11N17MAIN1.lib

SI:95 Formula:C10H16 CAS:5794-04-7 MolWeight:136 RetIndex:943

CompName:Bicyclo[2.2.1]heptane, 2,2-dimethyl-3-methylene-, (1S)-

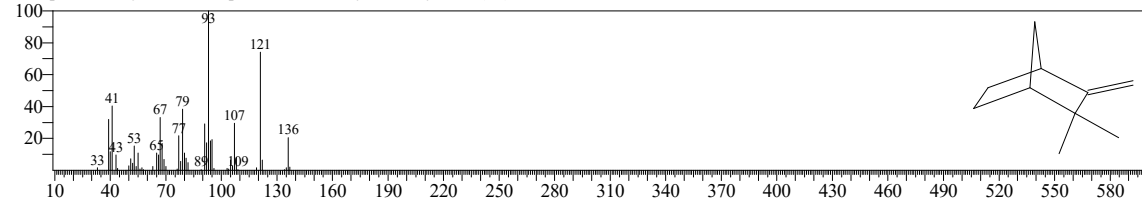

<< Target >>

Line#:2 R.Time:9.120(Scan#:1265) Retention Index:939 MassPeaks:302

RawMode:Averaged 9.060-9.200(1253-1281) BasePeak:93.05(12313)

BG Mode:Calc. from Peak Group 1 - Event 1 Scan

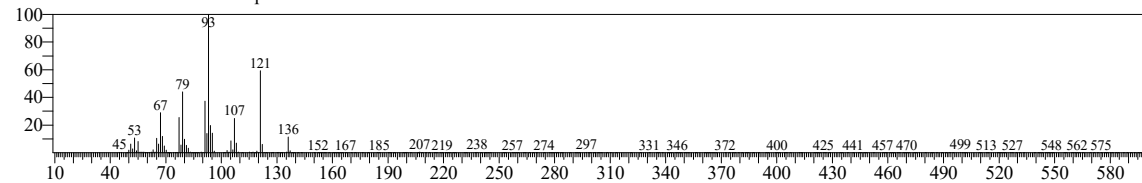

Hit#:9 Entry:40113 Library:W11N17MAIN1.lib

SI:95 Formula:C10H16 CAS:79-92-5 MolWeight:136 RetIndex:943

CompName:Bicyclo[2.2.1]heptane, 2,2-dimethyl-3-methylene-

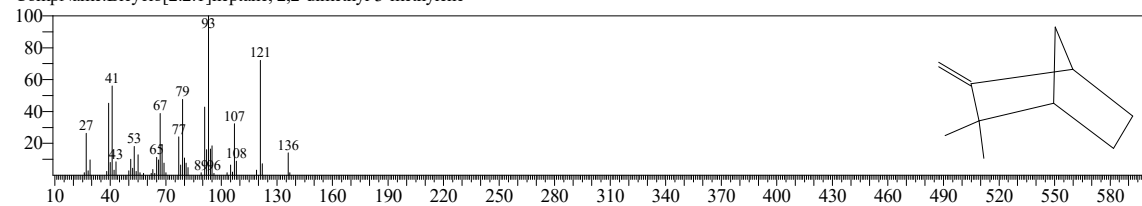

Hit#:10 Entry:40108 Library:W11N17MAIN1.lib

SI:95 Formula:C10H16 CAS:79-92-5 MolWeight:136 RetIndex:943

CompName:Camphene

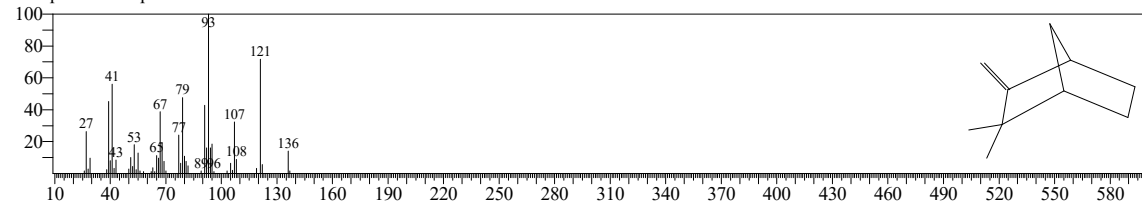

<< Target >>

Line#:3 R.Time:10.115(Scan#:1464) Retention Index:964 MassPeaks:277

RawMode:Averaged 10.055-10.180(1452-1477) BasePeak:93.05(99571)

BG Mode:Calc. from Peak Group 1 - Event 1 Scan

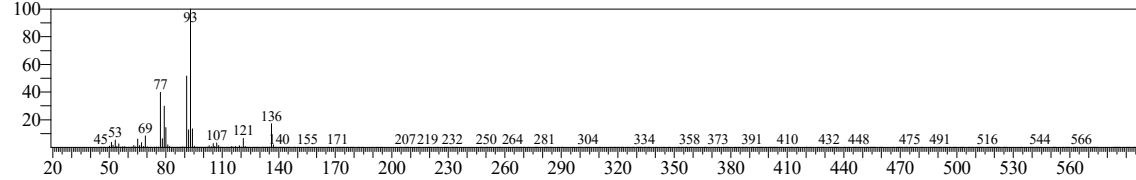

Hit#:1 Entry:18270 Library:NIST17.lib

SI:97 Formula:C10H16 CAS:3387-41-5 MolWeight:136 RetIndex:897

CompName:Bicyclo[3.1.0]hexane, 4-methylene-1-(1-methylethyl)-

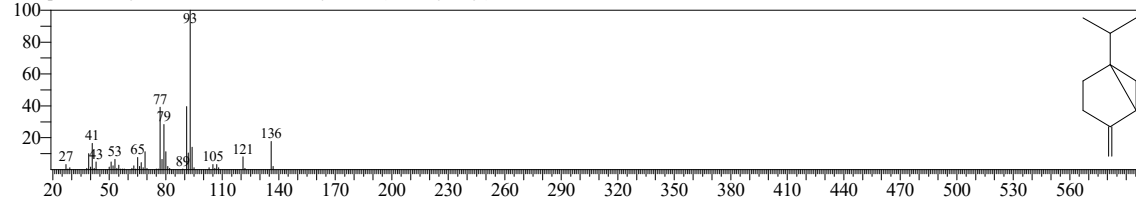

Hit#:2 Entry:40337 Library:W11N17MAIN1.lib

SI:97 Formula:C10H16 CAS:3387-41-5 MolWeight:136 RetIndex:897

CompName:Bicyclo[3.1.0]hexane, 4-methylene-1-(1-methylethyl)-

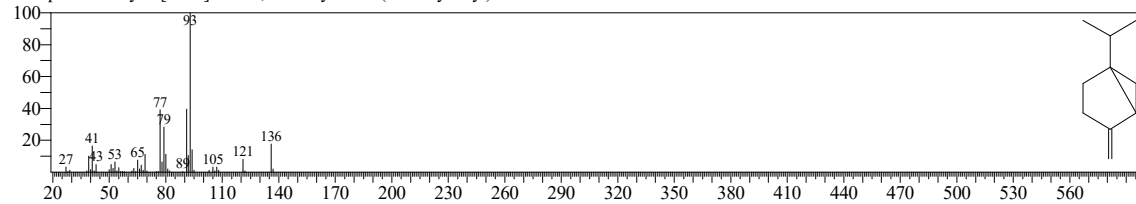

Hit#:3 Entry:958 Library:FFNSC 1.2.lib

SI:97 Formula:C10H16 CAS:3387-41-5 MolWeight:136 RetIndex:972

CompName:Sabinene; Bicyclo[3.1.0]hexane <4-methylene-, 1-(methylethyl)->

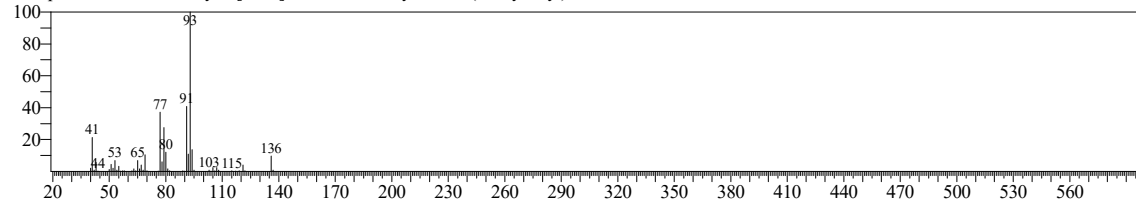

Hit#:4 Entry:40289 Library:W11N17MAIN1.lib

SI:96 Formula:C10H16 CAS:555-10-2 MolWeight:136 RetIndex:964

CompName:Cyclohexene, 3-methylene-6-(1-methylethyl)-

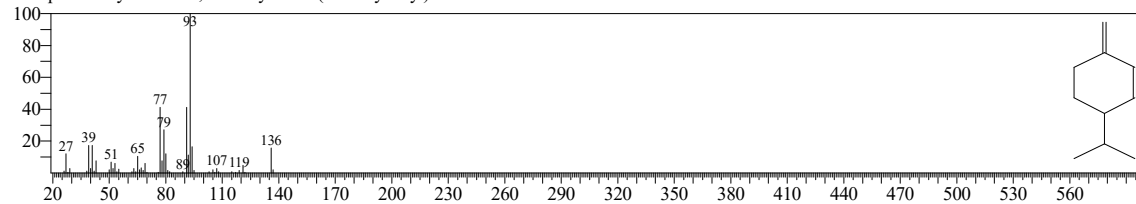

<< Target >>

Line#:3 R.Time:10.115(Scan#:1464) Retention Index:964 MassPeaks:277

RawMode:Averaged 10.055-10.180(1452-1477) BasePeak:93.05(99571)

BG Mode:Calc. from Peak Group 1 - Event 1 Scan

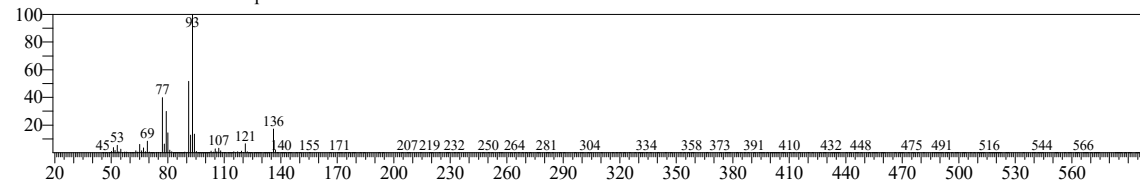

Hit#:5 Entry:40341 Library:W11N17MAIN1.lib

SI:96 Formula:C10H16 CAS:3387-41-5 MolWeight:136 RetIndex:897

CompName:4(10)-Thujene

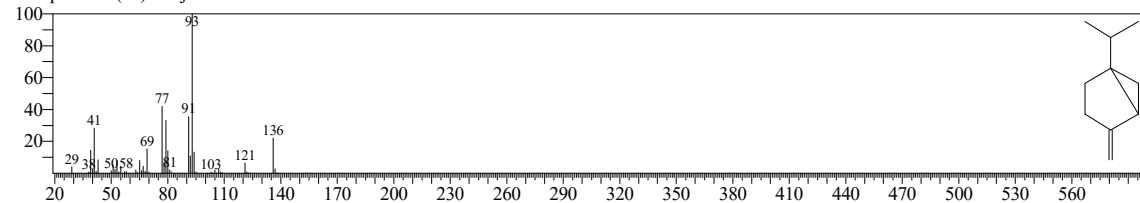

Hit#:6 Entry:40346 Library:W11N17MAIN1.lib

SI:95 Formula:C10H16 CAS:3387-41-5 MolWeight:136 RetIndex:897

CompName:4(10)-Thujene

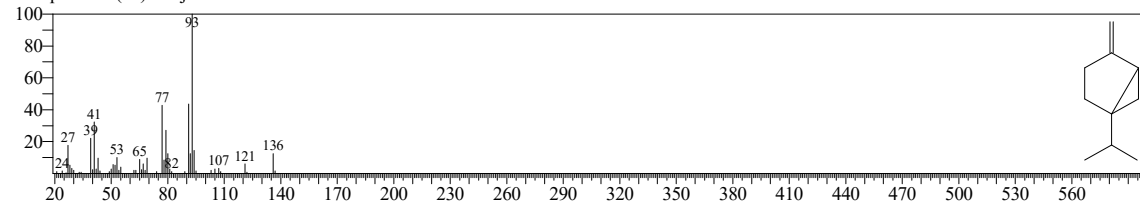

Hit#:7 Entry:40344 Library:W11N17MAIN1.lib

SI:94 Formula:C10H16 CAS:3387-41-5 MolWeight:136 RetIndex:897

CompName:4(10)-Thujene

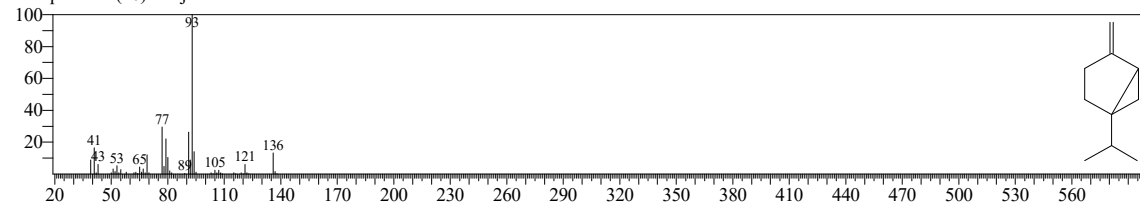

Hit#:8 Entry:18399 Library:NIST17.lib

SI:94 Formula:C10H16 CAS:499-97-8 MolWeight:136 RetIndex:1013

CompName:Cyclohexane, 1-methylene-4-(1-methylethenyl)-

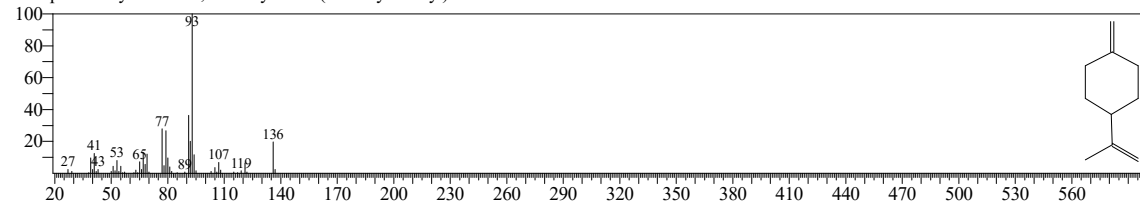



<< Target >>

Line#:3 R.Time:10.115(Scan#:1464) Retention Index:964 MassPeaks:277

RawMode:Averaged 10.055-10.180(1452-1477) BasePeak:93.05(99571)

BG Mode:Calc. from Peak Group 1 - Event 1 Scan

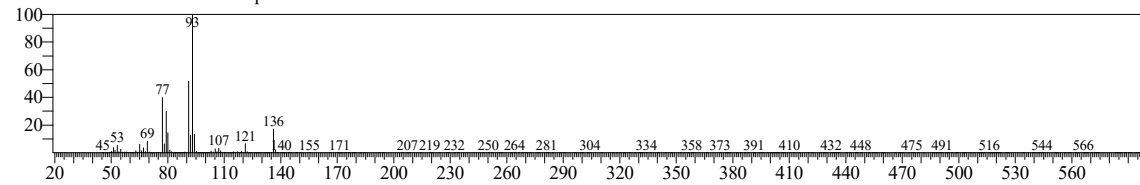

Hit#:9 Entry:40155 Library:W11N17MAIN1.lib

SI:94 Formula:C10H16 CAS:499-97-8 MolWeight:136 RetIndex:1013

CompName:Cyclohexane, 1-methylene-4-(1-methylethenyl)-

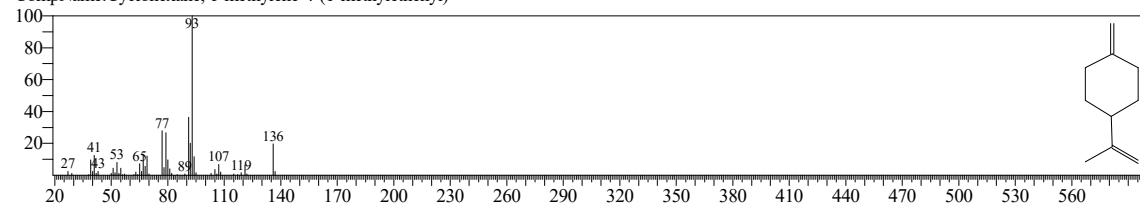

Hit#:10 Entry:40338 Library:W11N17MAIN1.lib

SI:93 Formula:C10H16 CAS:3387-41-5 MolWeight:136 RetIndex:897

CompName:Bicyclo[3.1.0]hexane, 4-methylene-1-(1-methylethyl)-

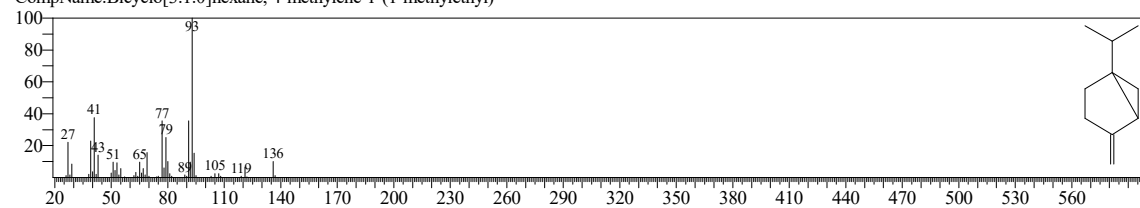

<< Target >>

Line#:4 R.Time:10.230(Scan#:1487) Retention Index:967 MassPeaks:265

RawMode:Averaged 10.180-10.335(1477-1508) BasePeak:93.05(38655)

BG Mode:Calc. from Peak Group 1 - Event 1 Scan

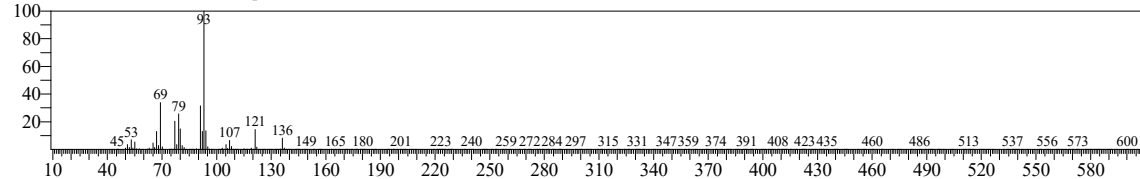

Hit#:1 Entry:837 Library:FFNSC 1.2.lib

SI:97 Formula:C10H16 CAS:127-91-3 MolWeight:136 RetIndex:978

CompName:Pinene <beta->; Bicyclo(3.1.1)heptane <6,6-dimethyl-, 2-methylene->

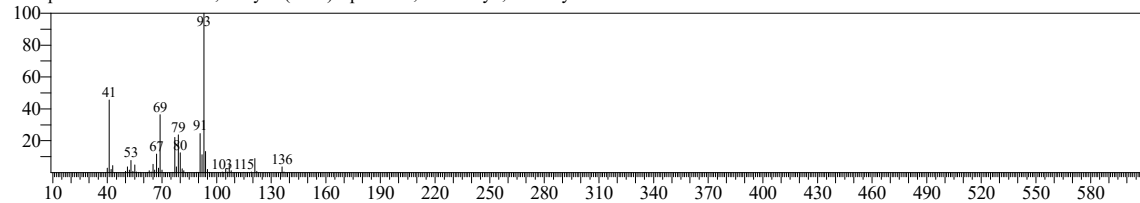

Hit#:2 Entry:40573 Library:W11N17MAIN1.lib

SI:97 Formula:C10H16 CAS:18172-67-3 MolWeight:136 RetIndex:943

CompName:Bicyclo[3.1.1]heptane, 6,6-dimethyl-2-methylene-, (1S)-

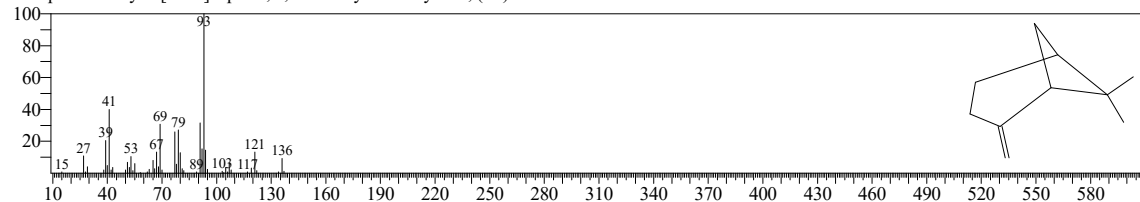

Hit#:3 Entry:18382 Library:NIST17.lib

SI:97 Formula:C10H16 CAS:18172-67-3 MolWeight:136 RetIndex:943

CompName:Bicyclo[3.1.1]heptane, 6,6-dimethyl-2-methylene-, (1S)-

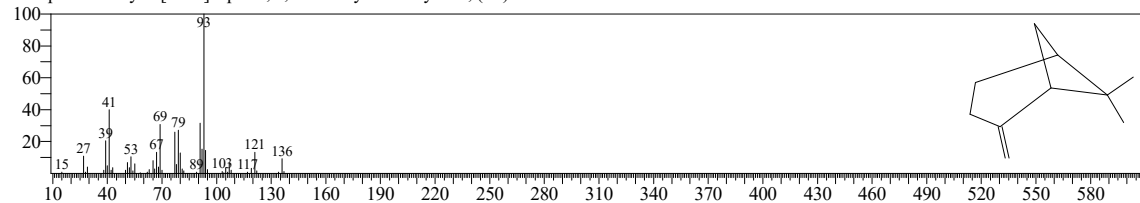

Hit#:4 Entry:18243 Library:NIST17.lib

SI:96 Formula:C10H16 CAS:127-91-3 MolWeight:136 RetIndex:943

CompName:.beta.-Pinene

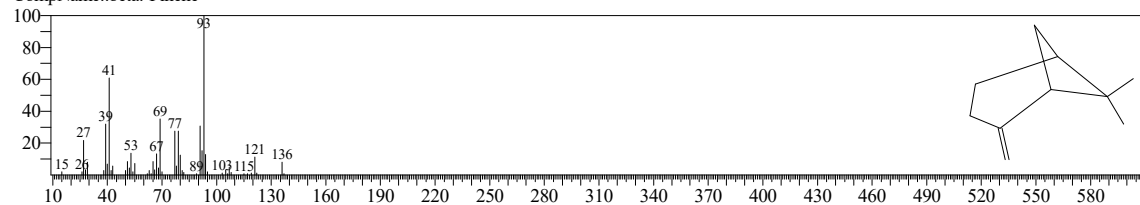

<< Target >>

Line#:4 R.Time:10.230(Scan#:1487) Retention Index:967 MassPeaks:265

RawMode:Averaged 10.180-10.335(1477-1508) BasePeak:93.05(38655)

BG Mode:Calc. from Peak Group 1 - Event 1 Scan

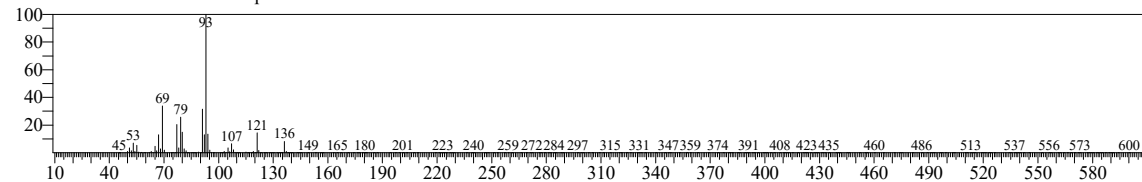

Hit#:5 Entry:40571 Library:W11N17MAIN1.lib

SI:96 Formula:C10H16 CAS:127-91-3 MolWeight:136 RetIndex:943

CompName:.beta.-Pinene

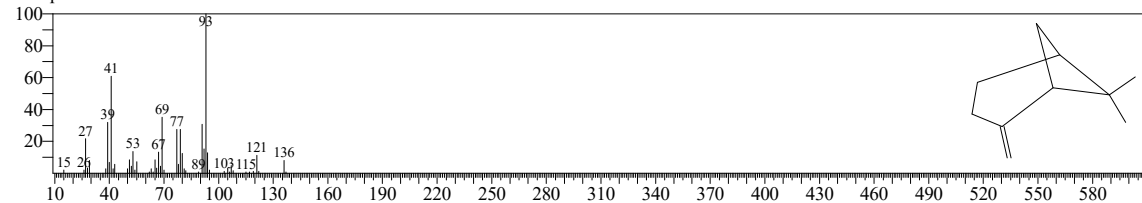

Hit#:6 Entry:40572 Library:W11N17MAIN1.lib

SI:95 Formula:C10H16 CAS:127-91-3 MolWeight:136 RetIndex:943

CompName:.beta.-Pinene

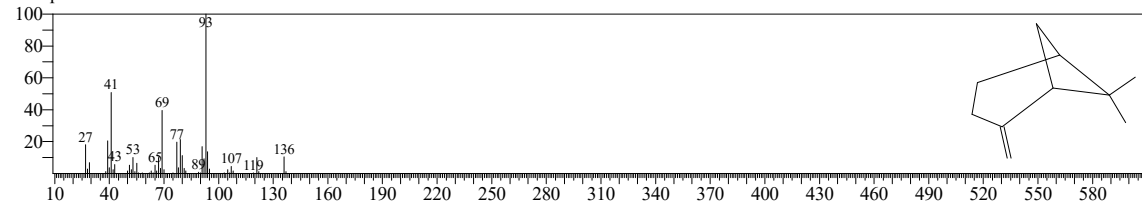

Hit#:7 Entry:18374 Library:NIST17.lib

SI:95 Formula:C10H16 CAS:127-91-3 MolWeight:136 RetIndex:943

CompName:.beta.-Pinene

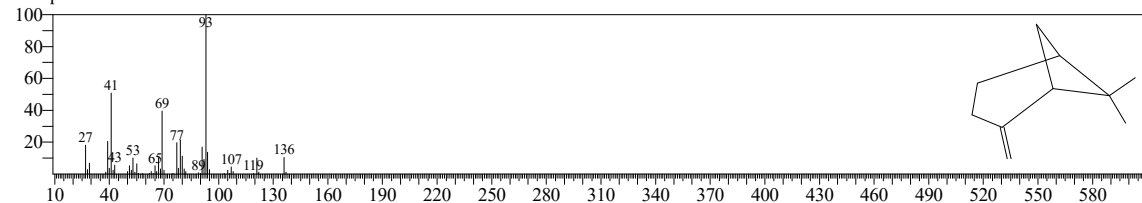

Hit#:8 Entry:40570 Library:W11N17MAIN1.lib

SI:95 Formula:C10H16 CAS:18172-67-3 MolWeight:136 RetIndex:943

CompName:Bicyclo[3.1.1]heptane, 6,6-dimethyl-2-methylene-, (1S)-

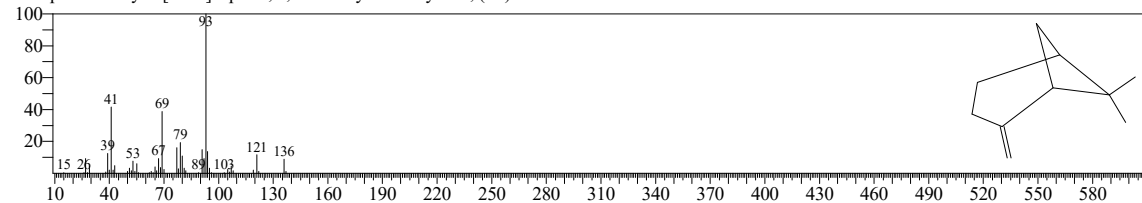

<< Target >>

Line#:4 R.Time:10.230(Scan#:1487) Retention Index:967 MassPeaks:265

RawMode:Averaged 10.180-10.335(1477-1508) BasePeak:93.05(38655)

BG Mode:Calc. from Peak Group 1 - Event 1 Scan

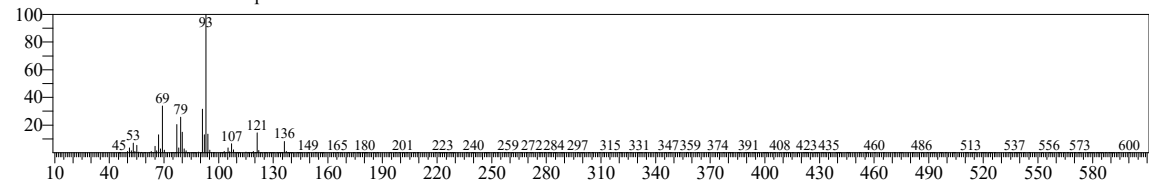

Hit#:9 Entry:18242 Library:NIST17.lib

SI:95 Formula:C10H16 CAS:18172-67-3 MolWeight:136 RetIndex:943

CompName:Bicyclo[3.1.1]heptane, 6,6-dimethyl-2-methylene-, (1S)-

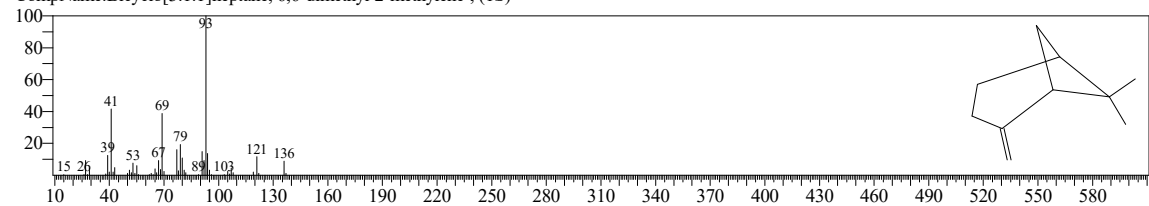

Hit#:10 Entry:18371 Library:NIST17.lib

SI:95 Formula:C10H16 CAS:18172-67-3 MolWeight:136 RetIndex:943

CompName:Bicyclo[3.1.1]heptane, 6,6-dimethyl-2-methylene-, (1S)-

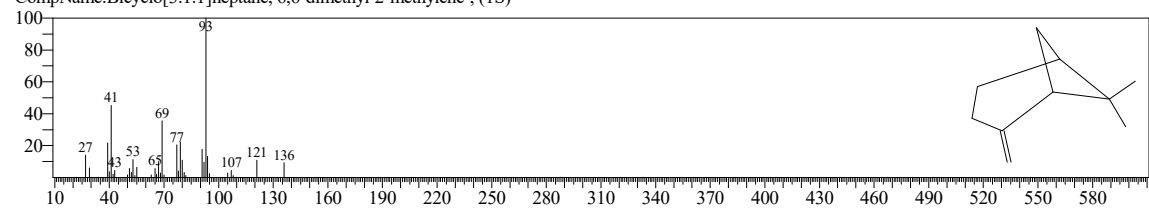

<< Target >>

Line#:5 R.Time:10.875(Scan#:1616) Retention Index:984 MassPeaks:291

RawMode:Averaged 10.840-11.000(1609-1641) BasePeak:93.05(14370)

BG Mode:Calc. from Peak Group 1 - Event 1 Scan

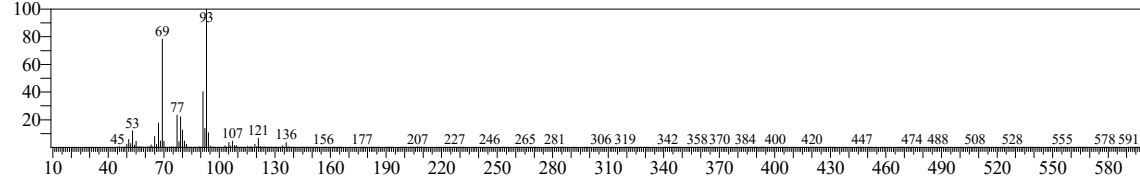

Hit#:1 Entry:628 Library:FFNSC 1.2.lib

SI:95 Formula:C10H16 CAS:123-35-3 MolWeight:136 RetIndex:991

CompName:Myrcene; Octa-1,6-diene <7-methyl-, 3-methylene->

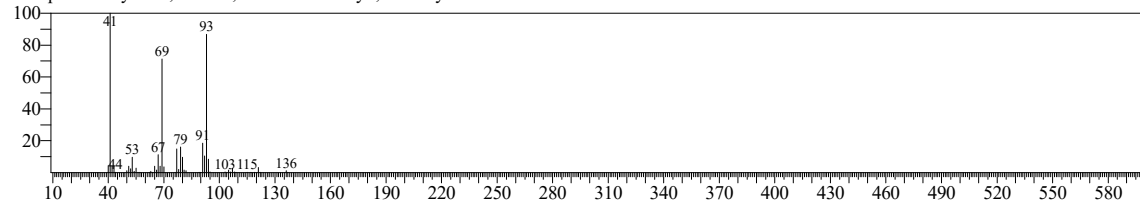

Hit#:2 Entry:40508 Library:W11N17MAIN1.lib

SI:94 Formula:C10H16 CAS:123-35-3 MolWeight:136 RetIndex:958

CompName:.beta.-Myrcene

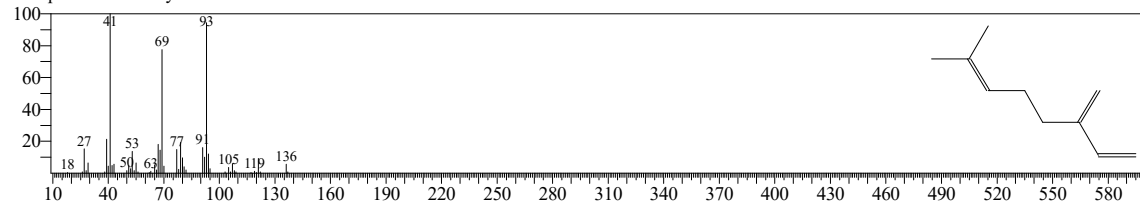

Hit#:3 Entry:18341 Library:NIST17.lib

SI:94 Formula:C10H16 CAS:123-35-3 MolWeight:136 RetIndex:958

CompName:.beta.-Myrcene

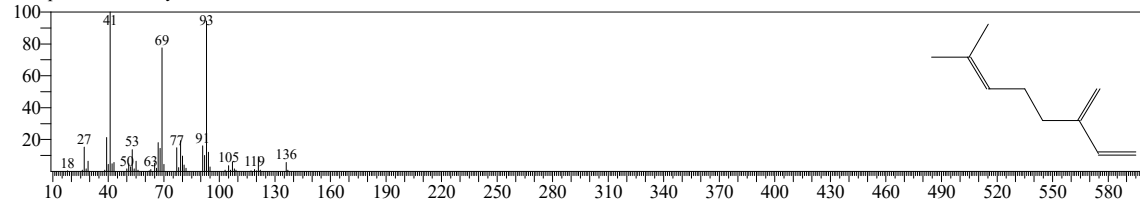

Hit#:4 Entry:40507 Library:W11N17MAIN1.lib

SI:94 Formula:C10H16 CAS:123-35-3 MolWeight:136 RetIndex:958

CompName:.beta.-Myrcene

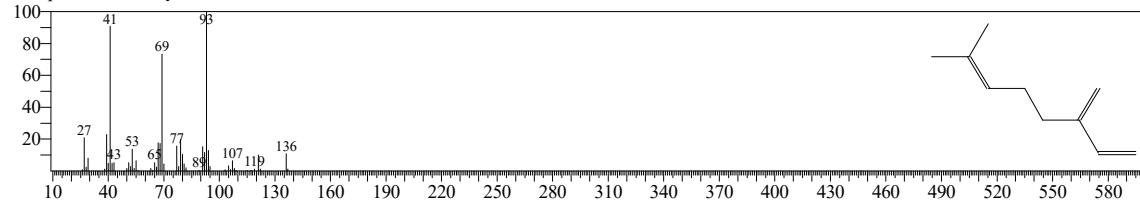

<< Target >>

Line#:5 R.Time:10.875(Scan#:1616) Retention Index:984 MassPeaks:291

RawMode:Averaged 10.840-11.000(1609-1641) BasePeak:93.05(14370)

BG Mode:Calc. from Peak Group 1 - Event 1 Scan

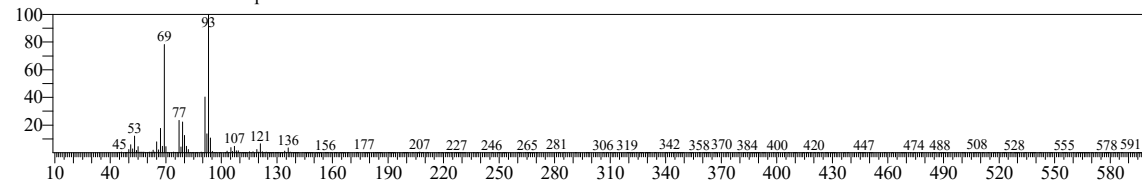

Hit#:5 Entry:18375 Library:NIST17.lib

SI:94 Formula:C10H16 CAS:123-35-3 MolWeight:136 RetIndex:958

CompName:beta.-Myrcene

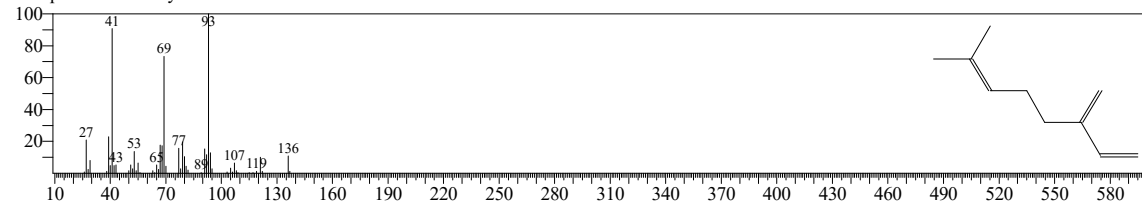

Hit#:6 Entry:40510 Library:W11N17MAIN1.lib

SI:94 Formula:C10H16 CAS:123-35-3 MolWeight:136 RetIndex:958

CompName:beta.-Myrcene

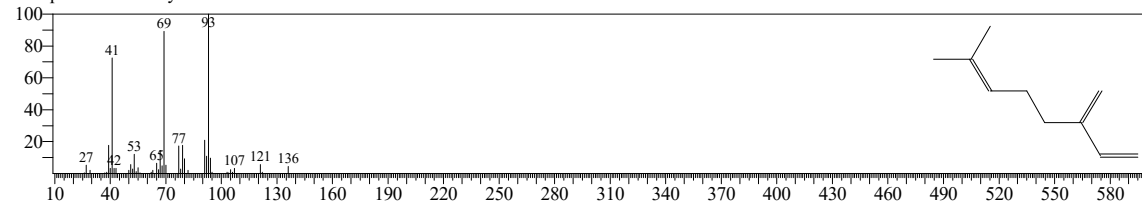

Hit#:7 Entry:18386 Library:NIST17.lib

SI:94 Formula:C10H16 CAS:123-35-3 MolWeight:136 RetIndex:958

CompName:beta.-Myrcene

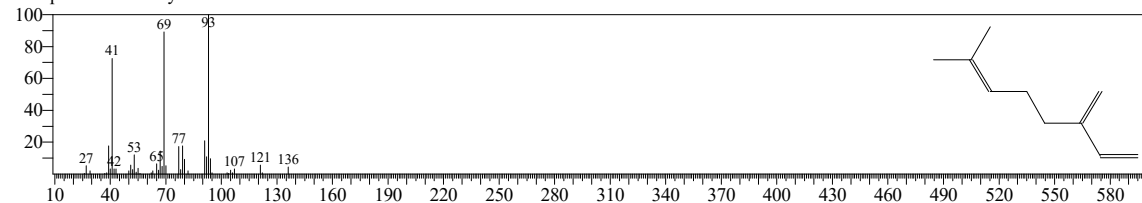

Hit#:8 Entry:40506 Library:W11N17MAIN1.lib

SI:93 Formula:C10H16 CAS:123-35-3 MolWeight:136 RetIndex:958

CompName:1,6-Octadiene, 7-methyl-3-methylene-

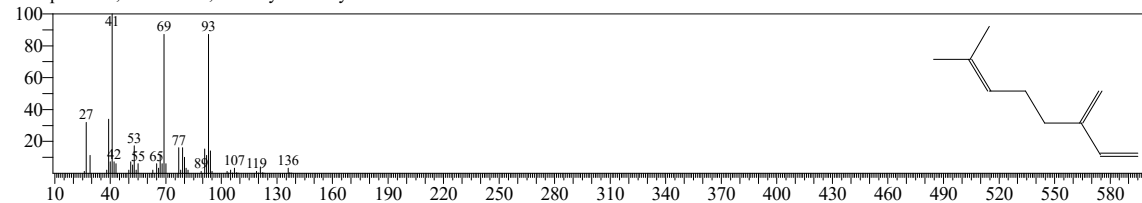

<< Target >>

Line#:5 R.Time:10.875(Scan#:1616) Retention Index:984 MassPeaks:291

RawMode:Averaged 10.840-11.000(1609-1641) BasePeak:93.05(14370)

BG Mode:Calc. from Peak Group 1 - Event 1 Scan

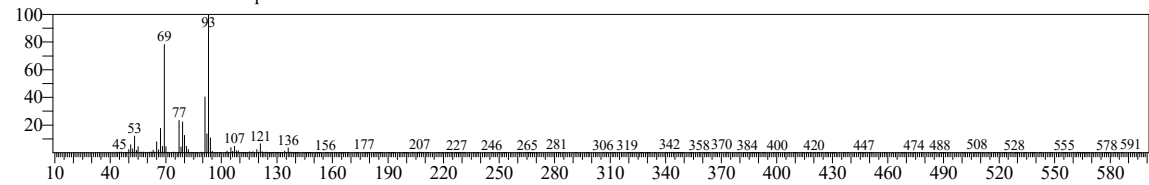

Hit#:9 Entry:40571 Library:W11N17MAIN1.lib

SI:93 Formula:C10H16 CAS:127-91-3 MolWeight:136 RetIndex:943

CompName:beta.-Pinene

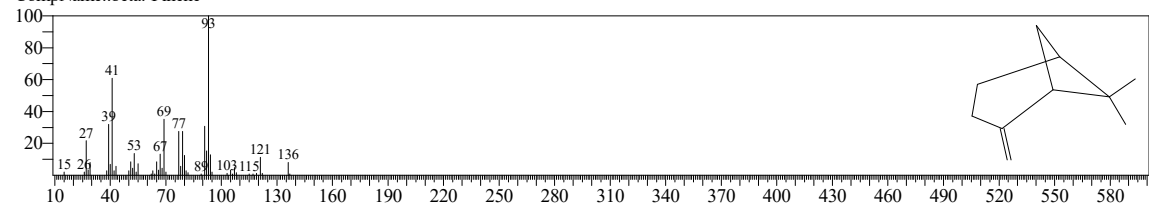

Hit#:10 Entry:18243 Library:NIST17.lib

SI:93 Formula:C10H16 CAS:127-91-3 MolWeight:136 RetIndex:943

CompName:beta.-Pinene

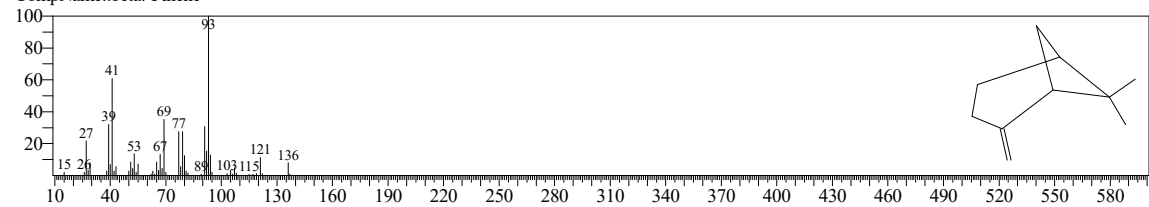

<< Target >>

Line#:6 R.Time:12.300(Scan#:1901) Retention Index:1017 MassPeaks:265

RawMode:Averaged 12.265-12.385(1894-1918) BasePeak:119.10(6965)

BG Mode:Calc. from Peak Group 1 - Event 1 Scan

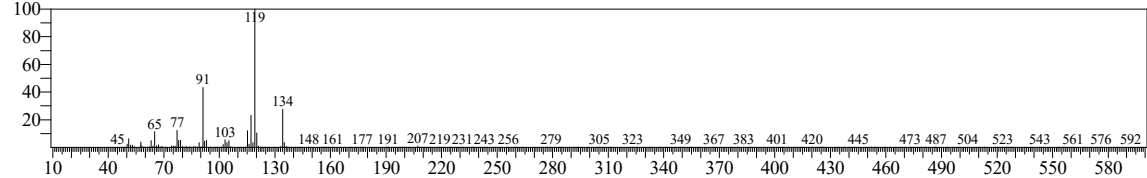

Hit#:1 Entry:37470 Library:W11N17MAIN1.lib

SI:95 Formula:C10H14 CAS:527-84-4 MolWeight:134 RetIndex:1042

CompName:o-Cymene

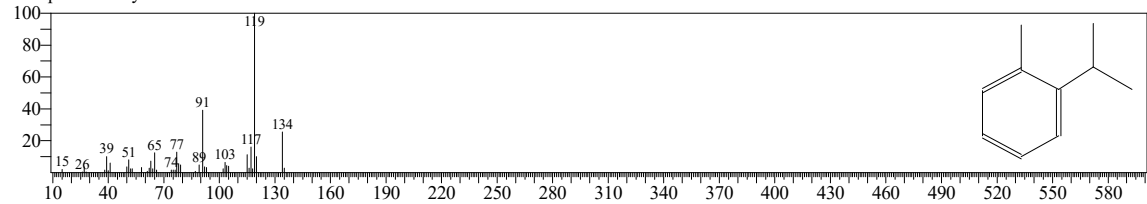

Hit#:2 Entry:17021 Library:NIST17.lib

SI:95 Formula:C10H14 CAS:527-84-4 MolWeight:134 RetIndex:1042

CompName:o-Cymene

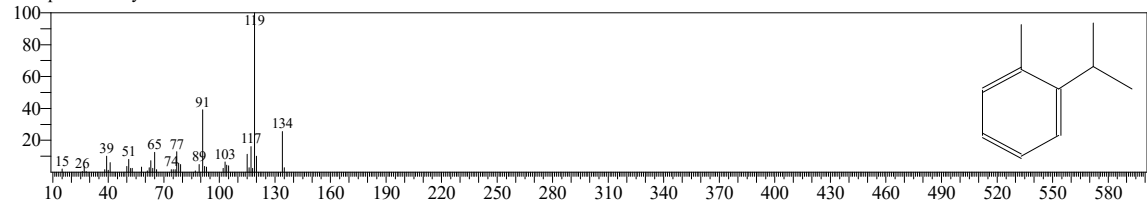

Hit#:3 Entry:17076 Library:NIST17.lib

SI:95 Formula:C10H14 CAS:99-87-6 MolWeight:134 RetIndex:1042

CompName:p-Cymene

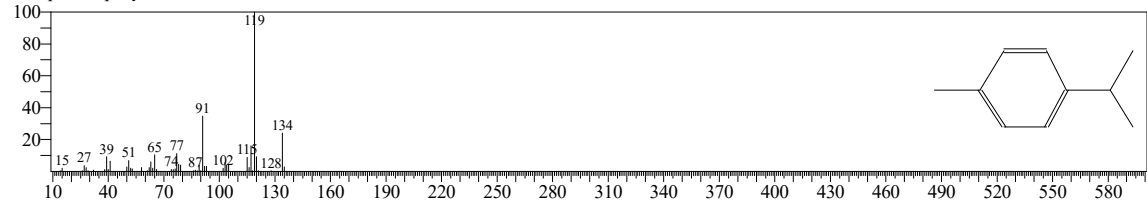

Hit#:4 Entry:37273 Library:W11N17MAIN1.lib

SI:95 Formula:C10H14 CAS:99-87-6 MolWeight:134 RetIndex:1042

CompName:p-Cymene

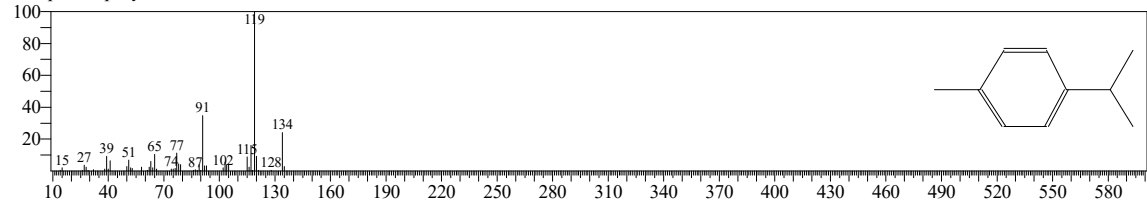



<< Target >>

Line#:6 R.Time:12.300(Scan#:1901) Retention Index:1017 MassPeaks:265

RawMode:Averaged 12.265-12.385(1894-1918) BasePeak:119.10(6965)

BG Mode:Calc. from Peak Group 1 - Event 1 Scan

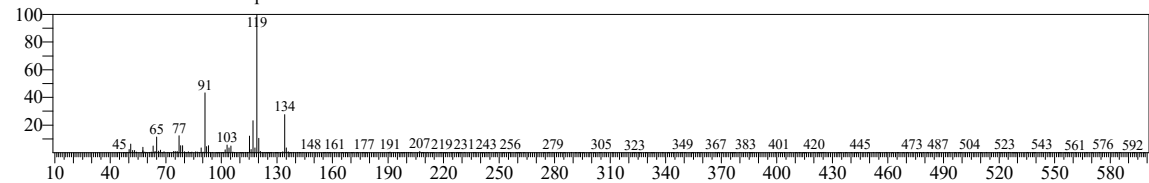

Hit#:5 Entry:37478 Library:W11N17MAIN1.lib

SI:95 Formula:C10H14 CAS:535-77-3 MolWeight:134 RetIndex:1042

CompName:Benzenes, 1-methyl-3-(1-methylethyl)-

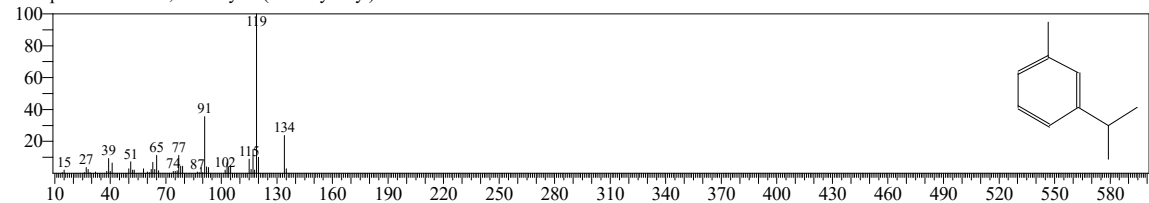

Hit#:6 Entry:17081 Library:NIST17.lib

SI:95 Formula:C10H14 CAS:535-77-3 MolWeight:134 RetIndex:1042

CompName:Benzenes, 1-methyl-3-(1-methylethyl)-

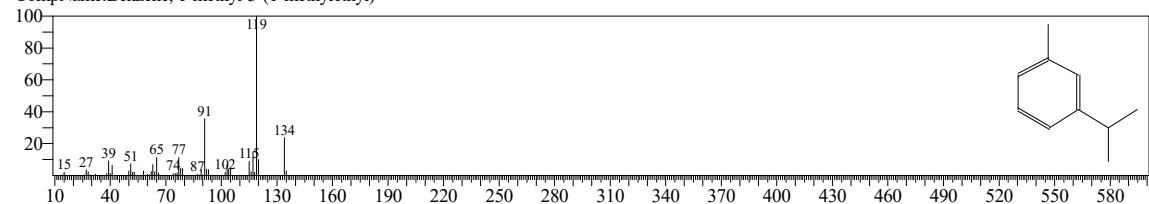

Hit#:7 Entry:317 Library:FFNSC 1.2.lib

SI:93 Formula:C10H14 CAS:99-87-6 MolWeight:134 RetIndex:1025

CompName:Cymene <para->; Benzenes <1-methyl-, 4-(1-methylethyl)->

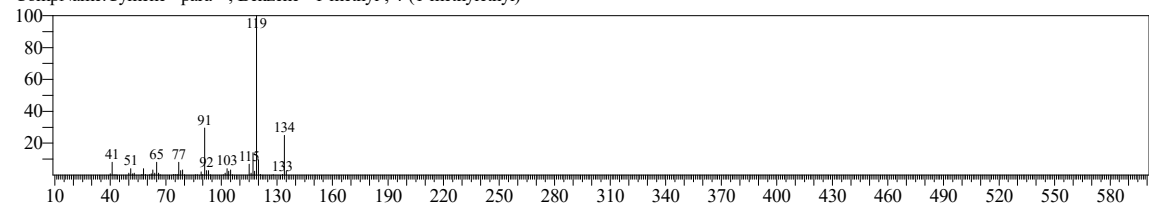

Hit#:8 Entry:37269 Library:W11N17MAIN1.lib

SI:93 Formula:C10H14 CAS:99-87-6 MolWeight:134 RetIndex:1042

CompName:Benzenes, 1-methyl-4-(1-methylethyl)-

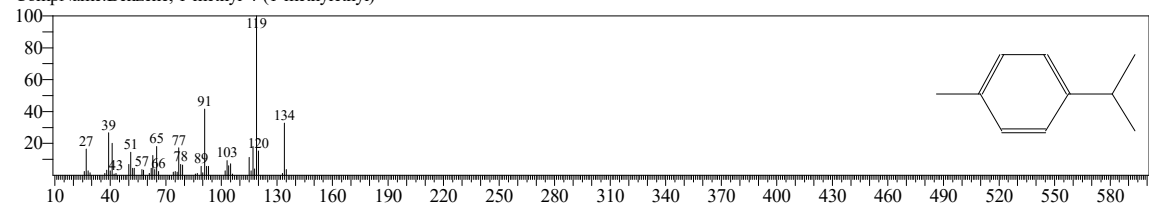

<< Target >>

Line#:6 R.Time:12.300(Scan#:1901) Retention Index:1017 MassPeaks:265

RawMode:Averaged 12.265-12.385(1894-1918) BasePeak:119.10(6965)

BG Mode:Calc. from Peak Group 1 - Event 1 Scan

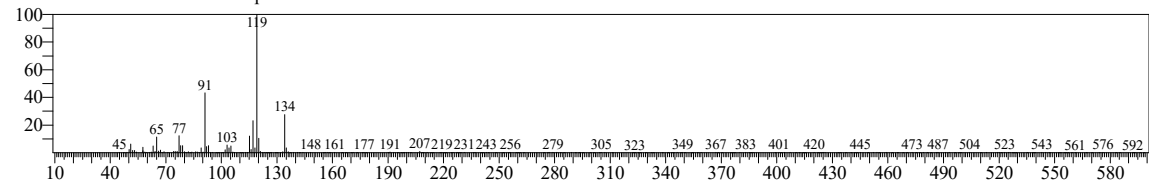

Hit#:9 Entry:37452 Library:W11N17MAIN1.lib

SI:92 Formula:C10H14 CAS:3479-89-8 MolWeight:134 RetIndex:1010

CompName:1,3,5-Cycloheptatriene, 3,7,7-trimethyl-

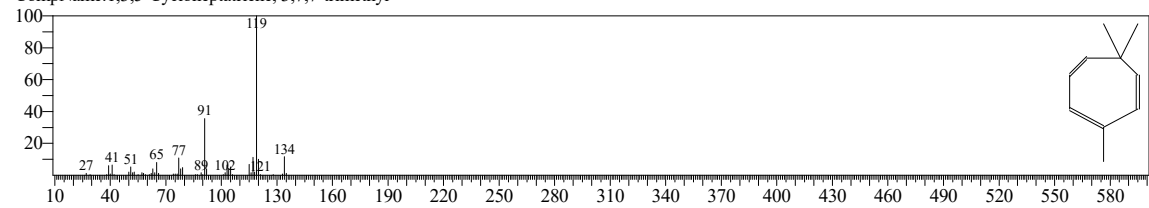

Hit#:10 Entry:17019 Library:NIST17.lib

SI:92 Formula:C10H14 CAS:3479-89-8 MolWeight:134 RetIndex:1010

CompName:1,3,5-Cycloheptatriene, 3,7,7-trimethyl-

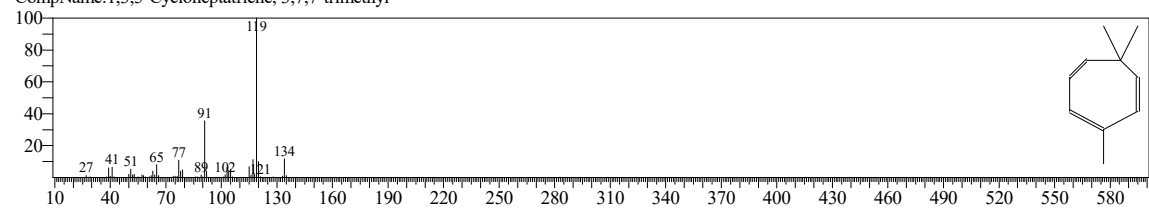

<< Target >>

Line#:7 R.Time:12.465(Scan#:1934) Retention Index:1021 MassPeaks:330

RawMode:Averaged 12.385-12.580(1918-1957) BasePeak:93.10(6622)

BG Mode:Calc. from Peak Group 1 - Event 1 Scan

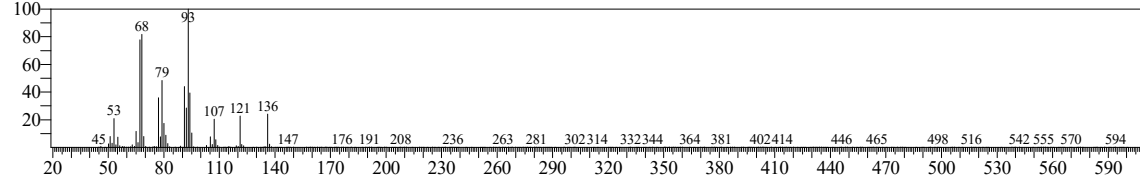

Hit#:1 Entry:18356 Library:NIST17.lib

SI:94 Formula:C10H16 CAS:5989-27-5 MolWeight:136 RetIndex:1018

CompName:D-Limonene

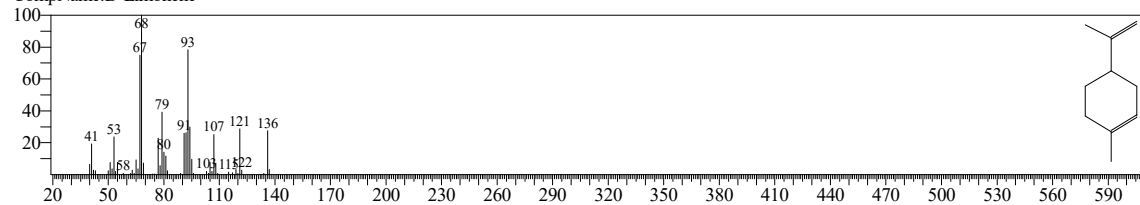

Hit#:2 Entry:40617 Library:W11N17MAIN1.lib

SI:94 Formula:C10H16 CAS:5989-27-5 MolWeight:136 RetIndex:1018

CompName:D-Limonene

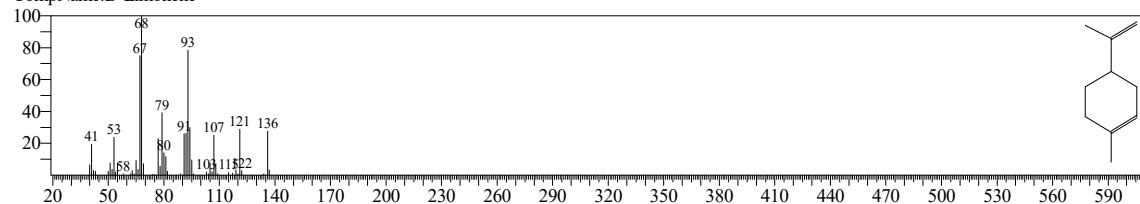

Hit#:3 Entry:18350 Library:NIST17.lib

SI:92 Formula:C10H16 CAS:138-86-3 MolWeight:136 RetIndex:1018

CompName:Limonene

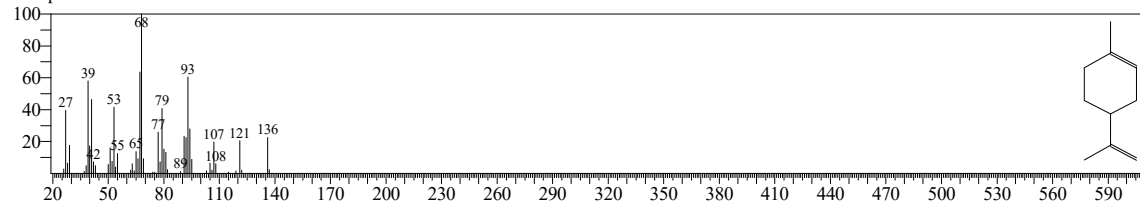

Hit#:4 Entry:40609 Library:W11N17MAIN1.lib

SI:92 Formula:C10H16 CAS:138-86-3 MolWeight:136 RetIndex:1018

CompName:Limonene

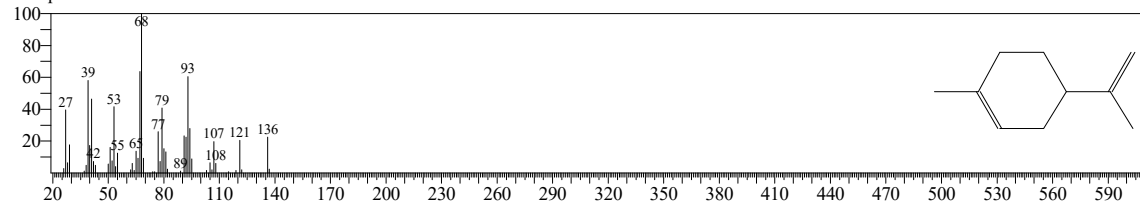

<< Target >>

Line#:7 R.Time:12.465(Scan#:1934) Retention Index:1021 MassPeaks:330

RawMode:Averaged 12.385-12.580(1918-1957) BasePeak:93.10(6622)

BG Mode:Calc. from Peak Group 1 - Event 1 Scan

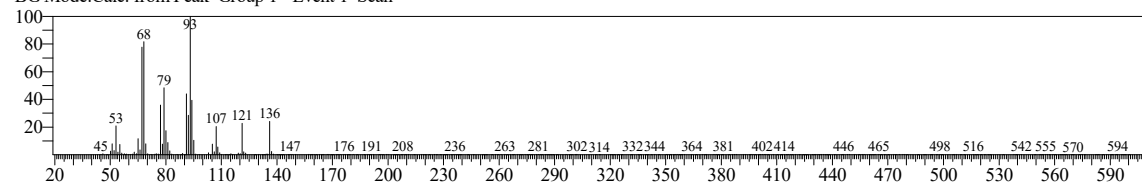

Hit#:5 Entry:40613 Library:W11N17MAIN1.lib

SI:92 Formula:C10H16 CAS:138-86-3 MolWeight:136 RetIndex:1018

CompName:Limonene

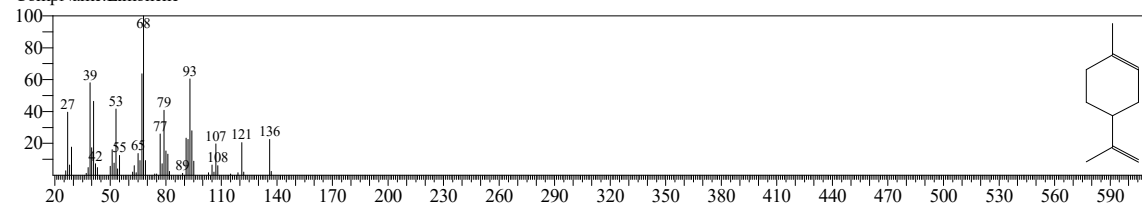

Hit#:6 Entry:443 Library:FFNSC 1.2.lib

SI:91 Formula:C10H16 CAS:138-86-3 MolWeight:136 RetIndex:1030

CompName:Limonene; Cyclohexene <1-methyl-, 4-(1-methylethenyl)->

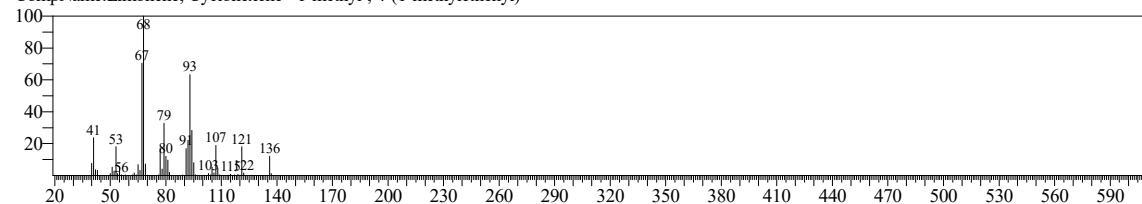

Hit#:7 Entry:18211 Library:NIST17.lib

SI:90 Formula:C10H16 CAS:19465-02-2 MolWeight:136 RetIndex:934

CompName:Cyclobutane, 1,2-bis(1-methylethenyl)-, trans-

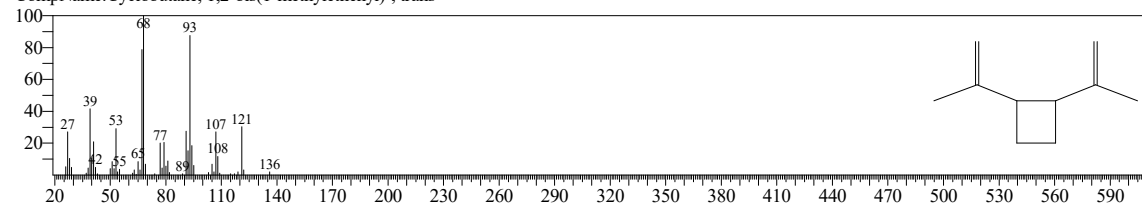

Hit#:8 Entry:40439 Library:W11N17MAIN1.lib

SI:90 Formula:C10H16 CAS:19465-02-2 MolWeight:136 RetIndex:934

CompName:Cyclobutane, 1,2-bis(1-methylethenyl)-, trans-

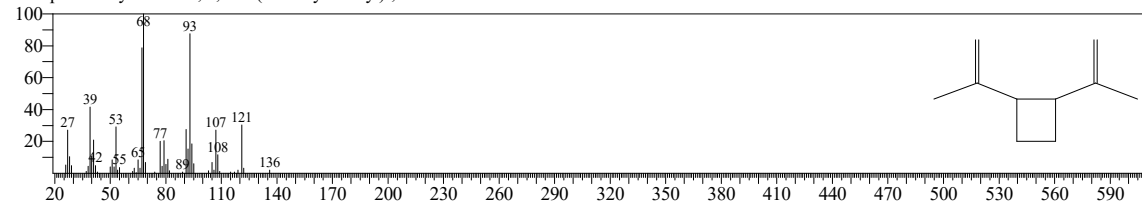

<< Target >>

Line#:7 R.Time:12.465(Scan#:1934) Retention Index:1021 MassPeaks:330

RawMode:Averaged 12.385-12.580(1918-1957) BasePeak:93.10(6622)

BG Mode:Calc. from Peak Group 1 - Event 1 Scan

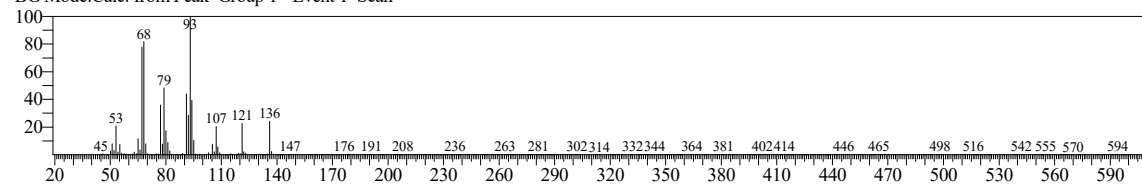

Hit#:9 Entry:40298 Library:W11N17MAIN1.lib

SI:90 Formula:C10H16 CAS:22769-00-2 MolWeight:136 RetIndex:1015

CompName:1,2-Di[(1E)-1-propenyl]cyclobutane

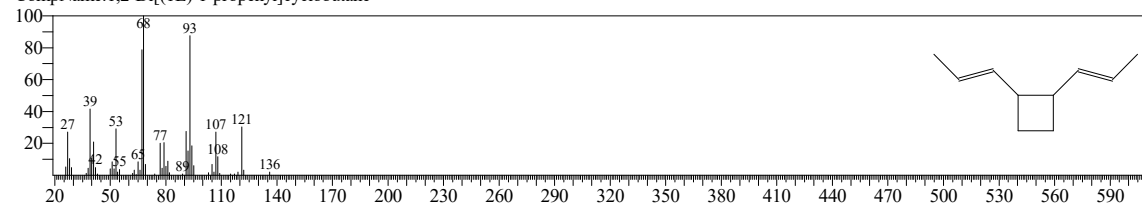

Hit#:10 Entry:40257 Library:W11N17MAIN1.lib

SI:90 Formula:C10H16 CAS:1461-27-4 MolWeight:136 RetIndex:1018

CompName:(+)-m-Mentha-1(6),8-diene

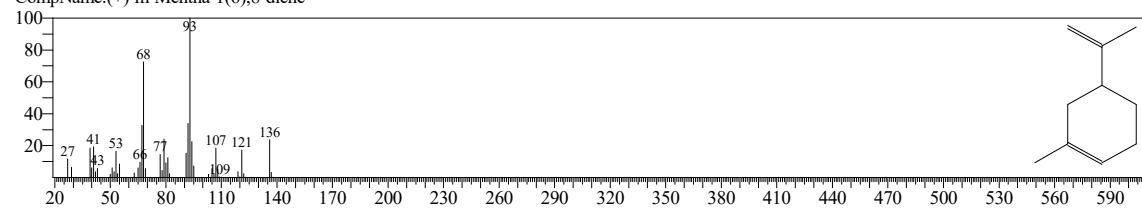

<< Target >>

Line#:8 R.Time:15.570(Scan#:2555) Retention Index:1090 MassPeaks:296

RawMode:Averaged 15.515-15.660(2544-2573) BasePeak:67.05(4914)

BG Mode:Calc. from Peak Group 1 - Event 1 Scan

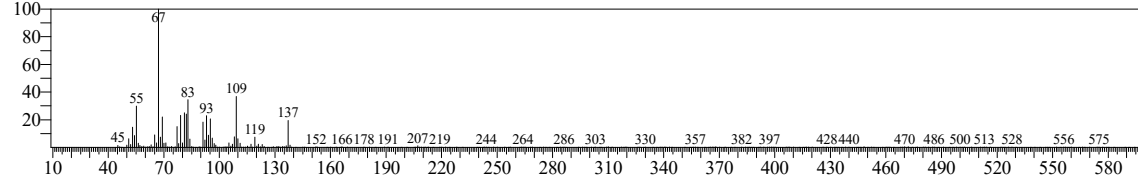

Hit#:1 Entry:29032 Library:NIST17.lib

SI:95 Formula:C10H16O CAS:1686-14-2 MolWeight:152 RetIndex:961

CompName:3-Oxatricyclo[4.1.1.0(2,4)]octane, 2,7,7-trimethyl-

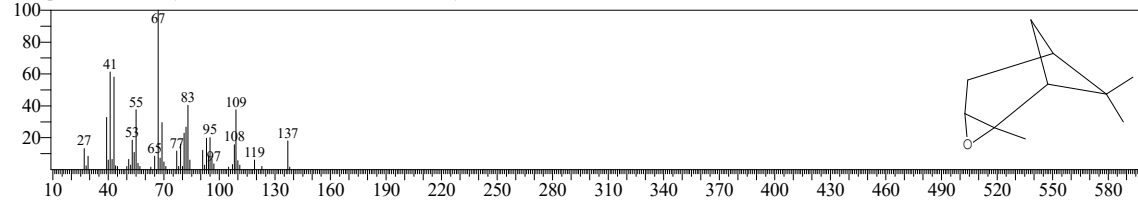

Hit#:2 Entry:67434 Library:W11N17MAIN1.lib

SI:95 Formula:C10H16O CAS:1686-14-2 MolWeight:152 RetIndex:961

CompName:3-Oxatricyclo[4.1.1.0(2,4)]octane, 2,7,7-trimethyl-

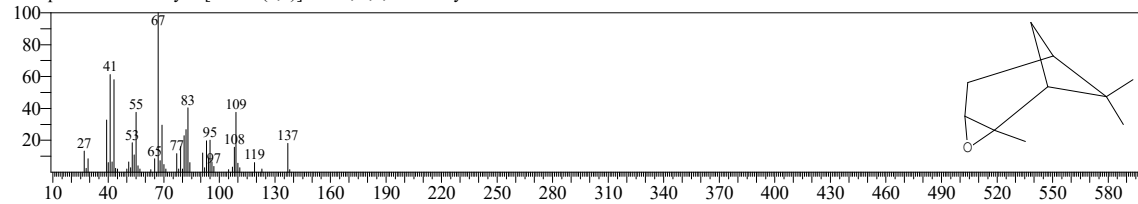

Hit#:3 Entry:67432 Library:W11N17MAIN1.lib

SI:94 Formula:C10H16O CAS:1686-14-2 MolWeight:152 RetIndex:961

CompName:3-Oxatricyclo[4.1.1.0(2,4)]octane, 2,7,7-trimethyl-

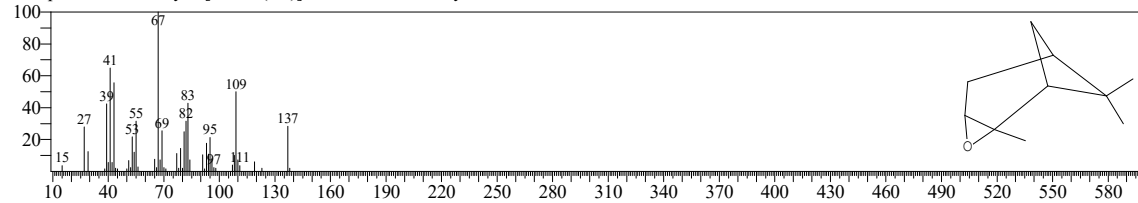

Hit#:4 Entry:29033 Library:NIST17.lib

SI:94 Formula:C10H16O CAS:1686-14-2 MolWeight:152 RetIndex:961

CompName:3-Oxatricyclo[4.1.1.0(2,4)]octane, 2,7,7-trimethyl-

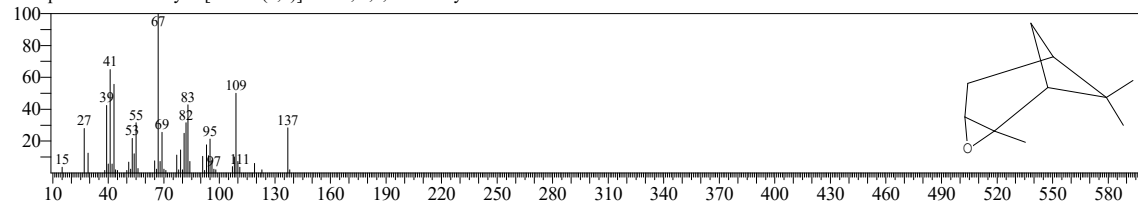

<< Target >>

Line#:8 R.Time:15.570(Scan#:2555) Retention Index:1090 MassPeaks:296

RawMode:Averaged 15.515-15.660(2544-2573) BasePeak:67.05(4914)

BG Mode:Calc. from Peak Group 1 - Event 1 Scan

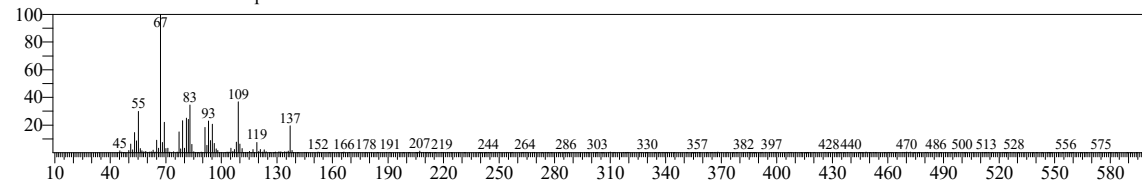

Hit#:5 Entry:67436 Library:W11N17MAIN1.lib

SI:94 Formula:C10H16O CAS:1686-14-2 MolWeight:152 RetIndex:961

CompName:3-Oxatricyclo[4.1.1.0,2,4]octane, 2,7,7-trimethyl-

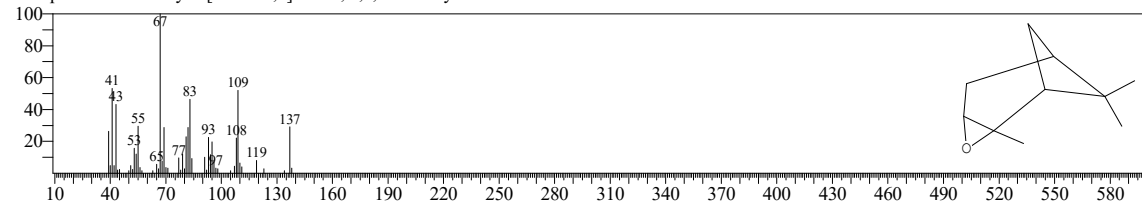

Hit#:6 Entry:67433 Library:W11N17MAIN1.lib

SI:91 Formula:C10H16O CAS:1686-14-2 MolWeight:152 RetIndex:961

CompName:3-Oxatricyclo[4.1.1.0(2,4)]octane, 2,7,7-trimethyl-

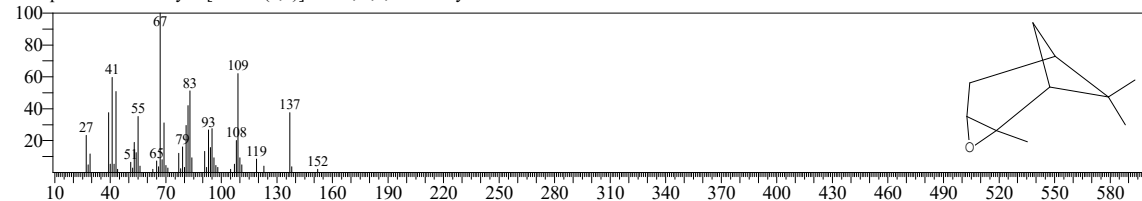

Hit#:7 Entry:28806 Library:NIST17.lib

SI:91 Formula:C10H16O CAS:1686-14-2 MolWeight:152 RetIndex:961

CompName:3-Oxatricyclo[4.1.1.0(2,4)]octane, 2,7,7-trimethyl-

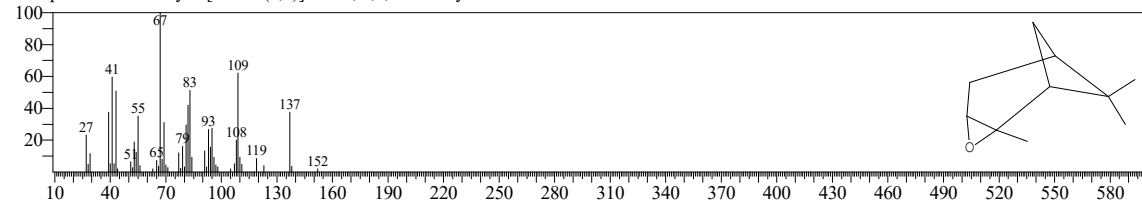

Hit#:8 Entry:955 Library:FFNSC 1.2.lib

SI:87 Formula:C10H16O CAS:13837-75-7 MolWeight:152 RetIndex:1142

CompName:Limonene oxide <cis->; Bicyclo[4.1.0]heptane <7-oxa-, 1-methyl-, 4-(1-methylethenyl)-, (1R,4R,6S)->

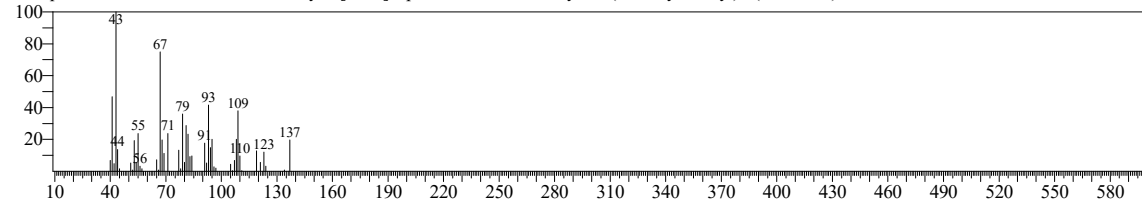

<< Target >>

Line#:8 R.Time:15.570(Scan#:2555) Retention Index:1090 MassPeaks:296

RawMode:Averaged 15.515-15.660(2544-2573) BasePeak:67.05(4914)

BG Mode:Calc. from Peak Group 1 - Event 1 Scan

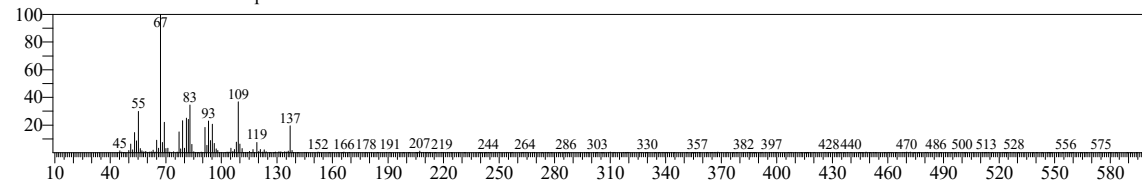

Hit#:9 Entry:28774 Library:NIST17.lib

SI:86 Formula:C10H16O CAS:32543-51-4 MolWeight:152 RetIndex:1031

CompName:cis-(-)-1,2-Epoxy-p-menth-8-ene

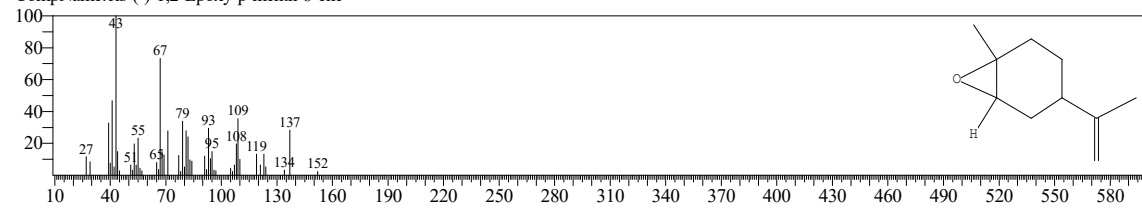

Hit#:10 Entry:66903 Library:W11N17MAIN1.lib

SI:86 Formula:C10H16O CAS:32543-51-4 MolWeight:152 RetIndex:1031

CompName:cis-(-)-1,2-Epoxy-p-menth-8-ene

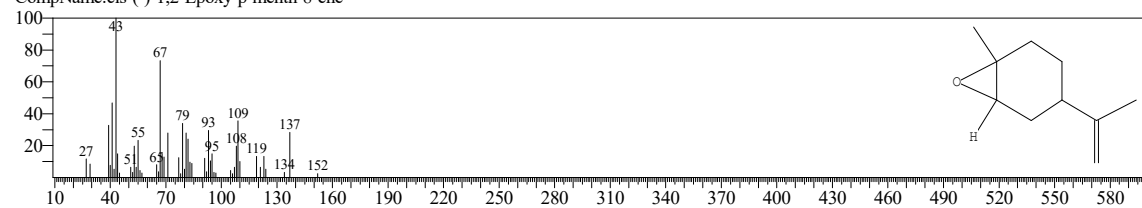



<< Target >>

Line#:9 R.Time:15.705(Scan#:2582) Retention Index:1093 MassPeaks:273

RawMode:Averaged 15.665-15.800(2574-2601) BasePeak:71.10(4253)

BG Mode:Calc. from Peak Group 1 - Event 1 Scan

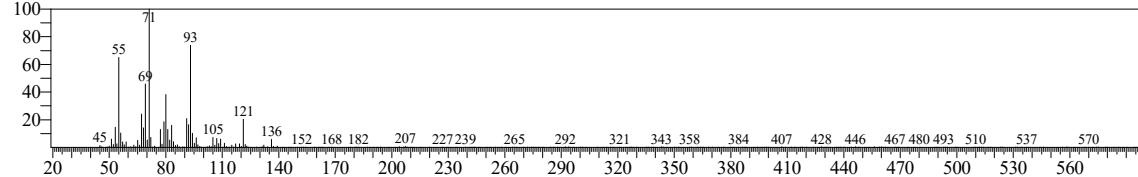

Hit#:1 Entry:365 Library:FFNSC 1.2.lib

SI:96 Formula:C10H18O CAS:78-70-6 MolWeight:154 RetIndex:1101

CompName:Linalool; Octa-1,6-dien-3-ol <3,7-dimethyl->

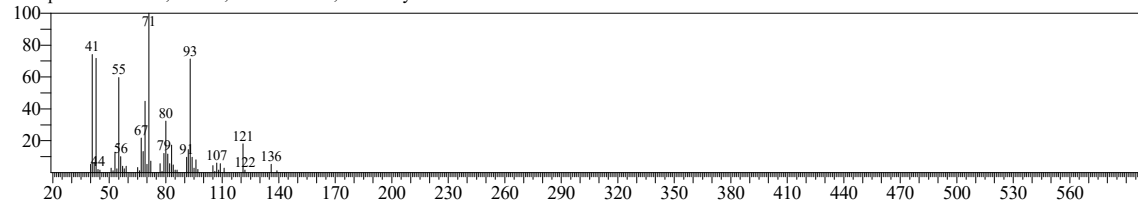

Hit#:2 Entry:30677 Library:NIST17.lib

SI:96 Formula:C10H18O CAS:78-70-6 MolWeight:154 RetIndex:1082

CompName:Linalool

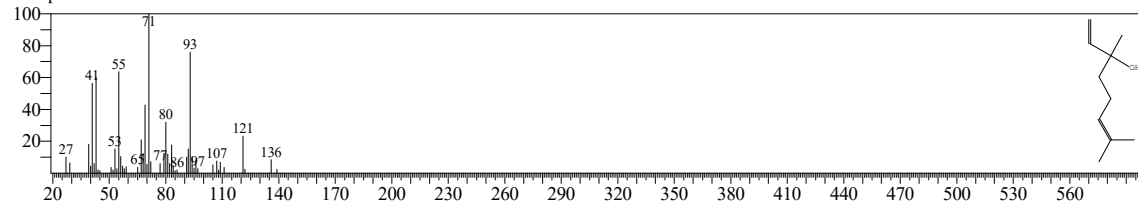

Hit#:3 Entry:71693 Library:W11N17MAIN1.lib

SI:96 Formula:C10H18O CAS:78-70-6 MolWeight:154 RetIndex:1082

CompName:Linalool

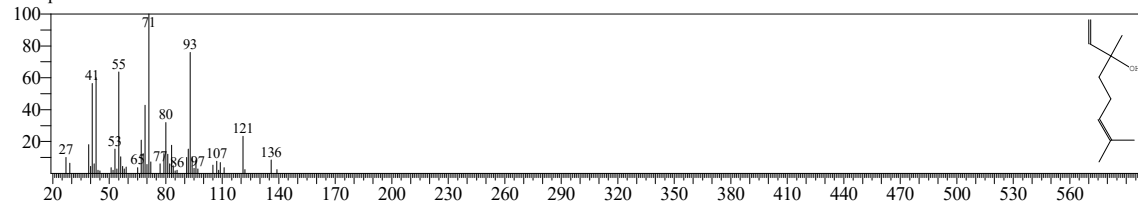

Hit#:4 Entry:71695 Library:W11N17MAIN1.lib

SI:95 Formula:C10H18O CAS:78-70-6 MolWeight:154 RetIndex:1082

CompName:1,6-Octadien-3-ol, 3,7-dimethyl-

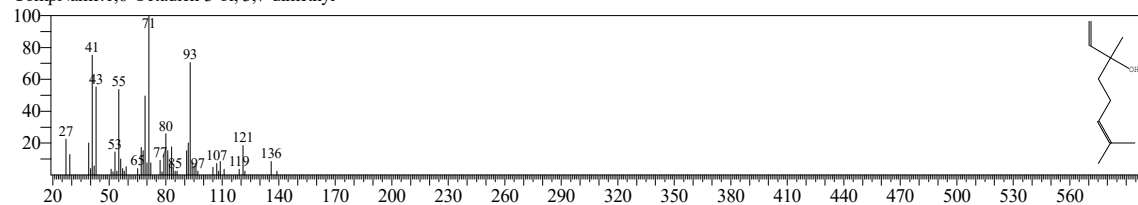

<< Target >>

Line#:9 R.Time:15.705(Scan#:2582) Retention Index:1093 MassPeaks:273

RawMode:Averaged 15.665-15.800(2574-2601) BasePeak:71.10(4253)

BG Mode:Calc. from Peak Group 1 - Event 1 Scan

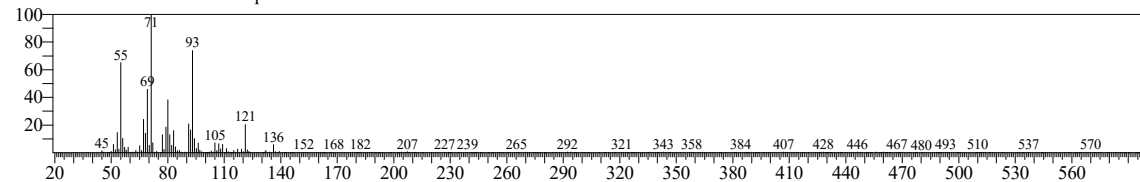

Hit#:5 Entry:40331 Library:W11N17MAIN1.lib

SI:94 Formula:C10H16 CAS:586-62-9 MolWeight:136 RetIndex:1052

CompName:4-Isopropylidene-1-cyclohexene

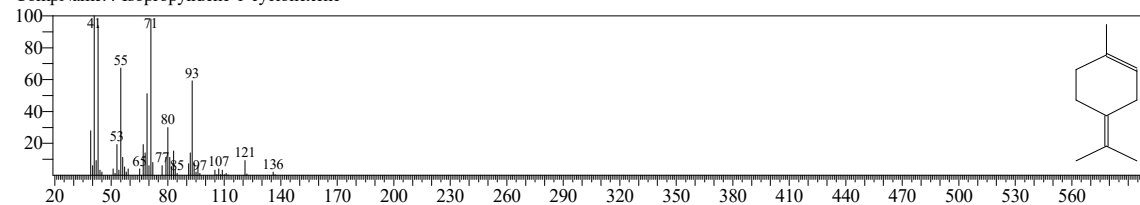

Hit#:6 Entry:71691 Library:W11N17MAIN1.lib

SI:94 Formula:C10H18O CAS:78-70-6 MolWeight:154 RetIndex:1082

CompName:Linalool

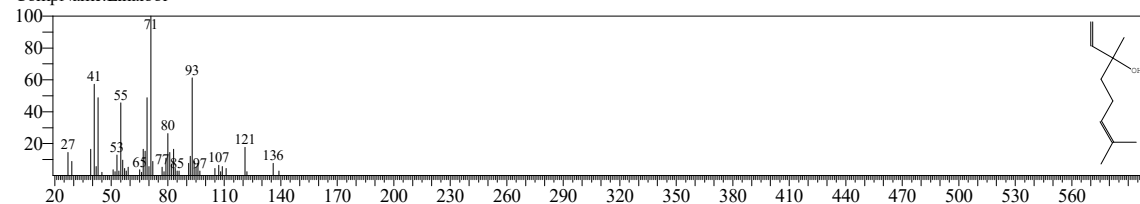

Hit#:7 Entry:30916 Library:NIST17.lib

SI:94 Formula:C10H18O CAS:78-70-6 MolWeight:154 RetIndex:1082

CompName:Linalool

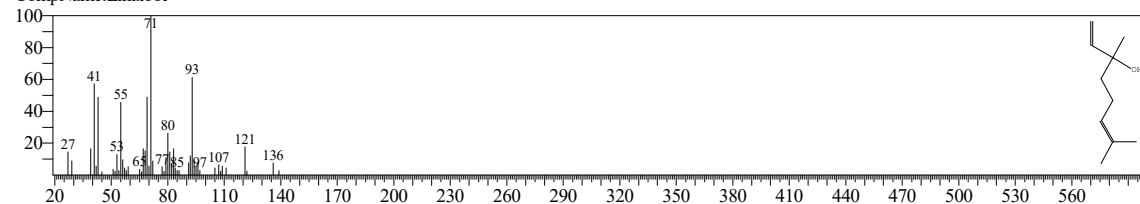

Hit#:8 Entry:71690 Library:W11N17MAIN1.lib

SI:93 Formula:C10H18O CAS:78-70-6 MolWeight:154 RetIndex:1082

CompName:Linalool

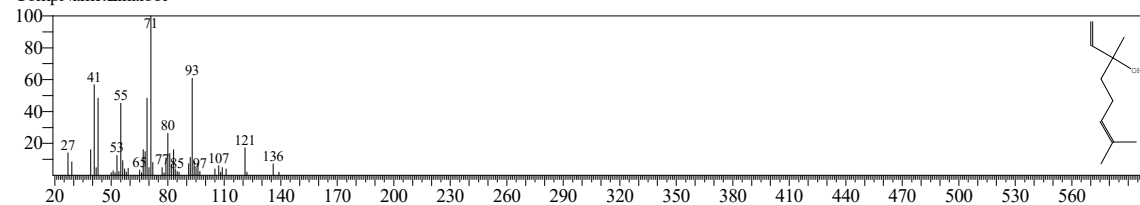

<< Target >>

Line#:9 R.Time:15.705(Scan#:2582) Retention Index:1093 MassPeaks:273

RawMode:Averaged 15.665-15.800(2574-2601) BasePeak:71.10(4253)

BG Mode:Calc. from Peak Group 1 - Event 1 Scan

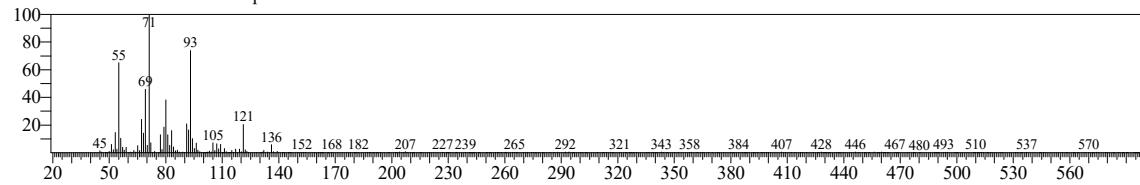

Hit#:9 Entry:30915 Library:NIST17.lib

SI:93 Formula:C10H18O CAS:78-70-6 MolWeight:154 RetIndex:1082

CompName:Linalool

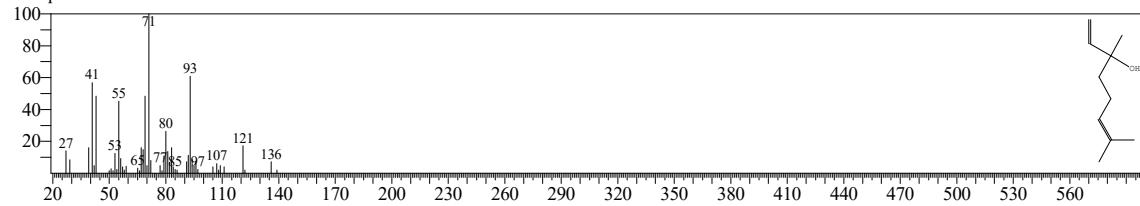

Hit#:10 Entry:71692 Library:W11N17MAIN1.lib

SI:93 Formula:C10H18O CAS:78-70-6 MolWeight:154 RetIndex:1082

CompName:1,6-Octadien-3-ol, 3,7-dimethyl-

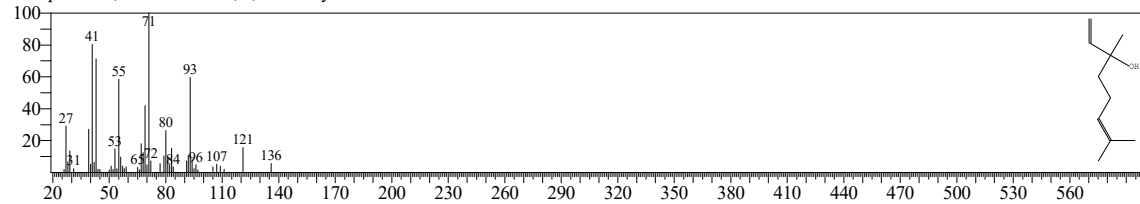

<< Target >>

Line#:10 R.Time:15.930(Scan#:2627) Retention Index:1098 MassPeaks:287

RawMode:Averaged 15.880-16.040(2617-2649) BasePeak:109.10(5318)

BG Mode:Calc. from Peak Group 1 - Event 1 Scan

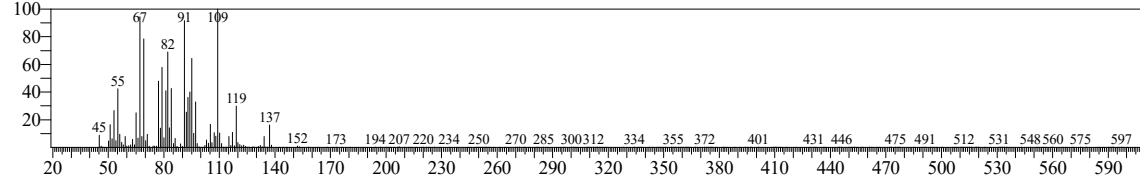

Hit#:1 Entry:67826 Library:W11N17MAIN1.lib

SI:86 Formula:C10H16O CAS:1845-30-3 MolWeight:152 RetIndex:1136

CompName:cis-Verbenol

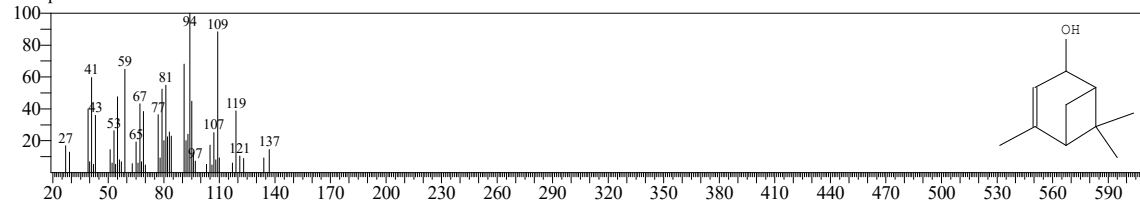

Hit#:2 Entry:28908 Library:NIST17.lib

SI:86 Formula:C10H16O CAS:1845-30-3 MolWeight:152 RetIndex:1136

CompName:cis-Verbenol

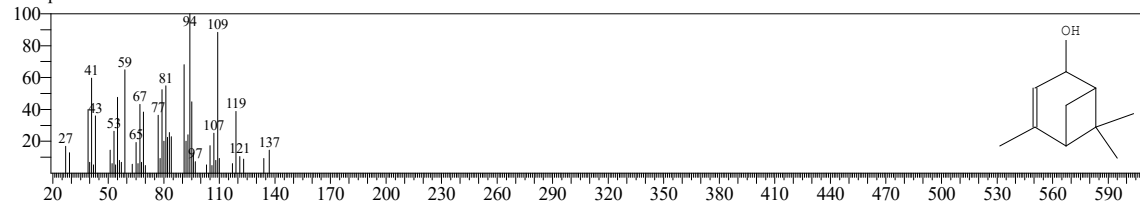

Hit#:3 Entry:67824 Library:W11N17MAIN1.lib

SI:86 Formula:C10H16O CAS:1845-30-3 MolWeight:152 RetIndex:1136

CompName:cis-Verbenol

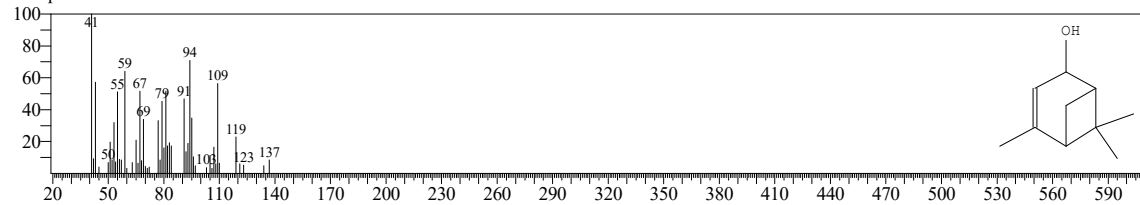

Hit#:4 Entry:67542 Library:W11N17MAIN1.lib

SI:86 Formula:C10H16O CAS:0-00-0 MolWeight:152 RetIndex:1201

CompName:cis-p-mentha-1(7),8-dien-2-ol

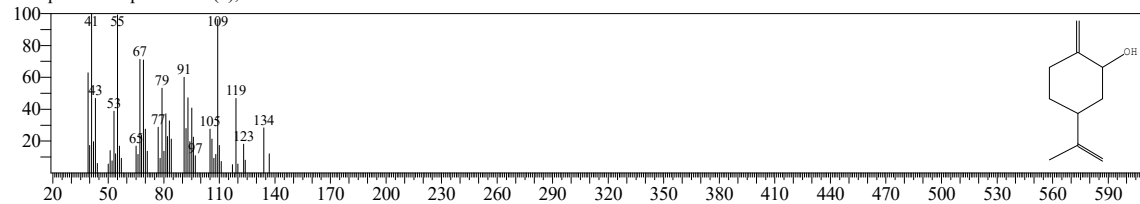

<< Target >>

Line#:10 R.Time:15.930(Scan#:2627) Retention Index:1098 MassPeaks:287

RawMode:Averaged 15.880-16.040(2617-2649) BasePeak:109.10(5318)

BG Mode:Calc. from Peak Group 1 - Event 1 Scan

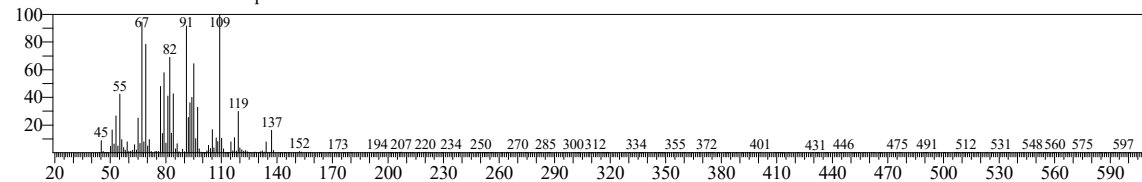

Hit#:5 Entry:29015 Library:NIST17.lib

SI:86 Formula:C10H16O CAS:1845-30-3 MolWeight:152 RetIndex:1136

CompName:cis-Verbenol

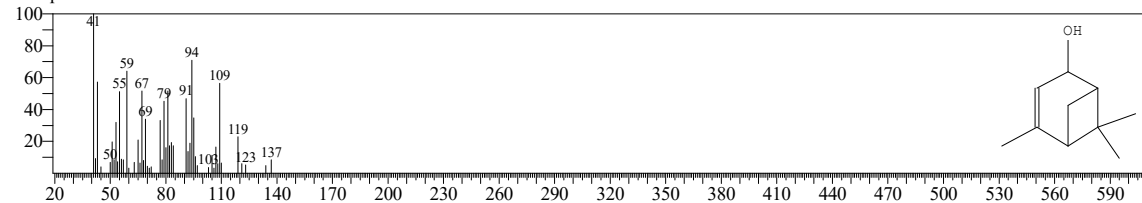

Hit#:6 Entry:28765 Library:NIST17.lib

SI:86 Formula:C10H16O CAS:0-00-0 MolWeight:152 RetIndex:1201

CompName:cis-p-mentha-1(7),8-dien-2-ol

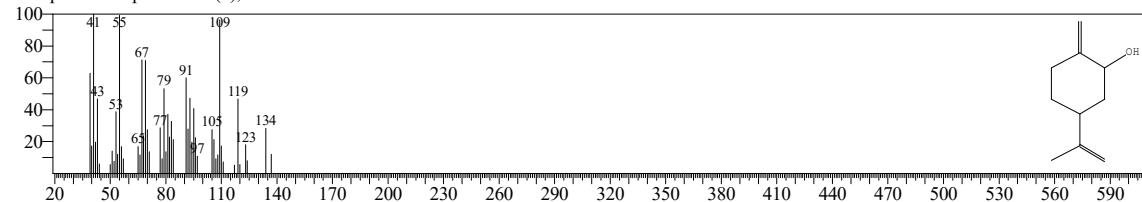

Hit#:7 Entry:971 Library:FFNSC 1.2.lib

SI:86 Formula:C10H16O CAS:473-67-6 MolWeight:152 RetIndex:1146

CompName:Verbenol; Bicyclo-[3.1.1]-hept-3-en-2-ol <4,6,6-trimethyl->

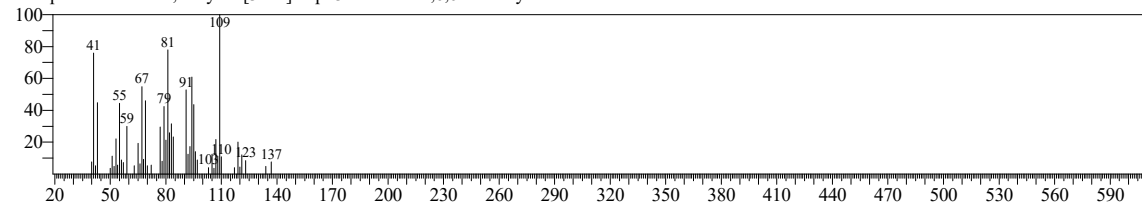

Hit#:8 Entry:67827 Library:W11N17MAIN1.lib

SI:86 Formula:C10H16O CAS:13040-03-4 MolWeight:152 RetIndex:1136

CompName:(1R)-cis-Verbenol

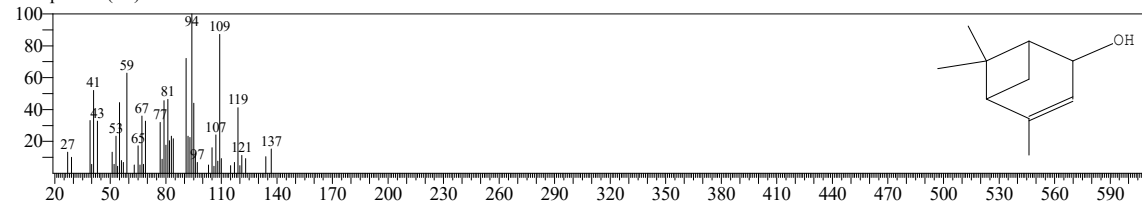

<< Target >>

Line#:10 R.Time:15.930(Scan#:2627) Retention Index:1098 MassPeaks:287

RawMode:Averaged 15.880-16.040(2617-2649) BasePeak:109.10(5318)

BG Mode:Calc. from Peak Group 1 - Event 1 Scan

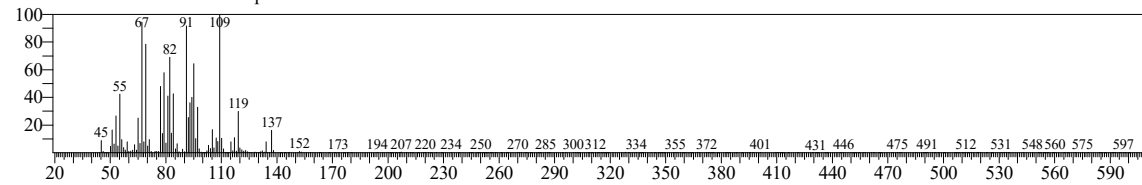

Hit#:9 Entry:28909 Library:NIST17.lib

SI:86 Formula:C10H16O CAS:13040-03-4 MolWeight:152 RetIndex:1136

CompName:(1R)-cis-Verbenol

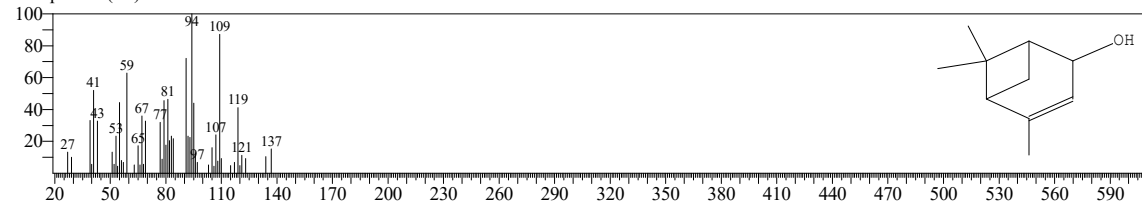

Hit#:10 Entry:67543 Library:W11N17MAIN1.lib

SI:85 Formula:C10H16O CAS:2102-62-7 MolWeight:152 RetIndex:1201

CompName:cis-p-Mentha-1(7),8-dien-2-ol

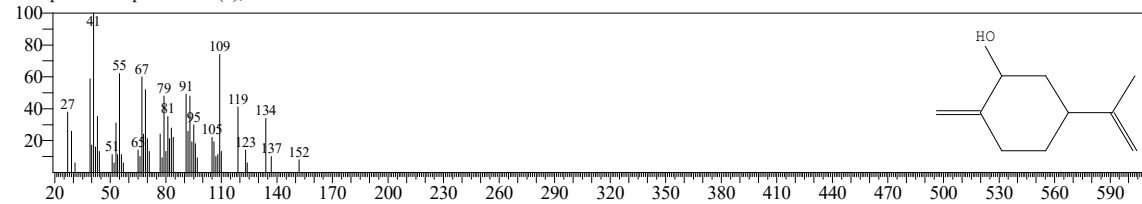

<< Target >>

Line#:11 R.Time:17.435(Scan#:2928) Retention Index:1130 MassPeaks:289

RawMode:Averaged 17.380-17.515(2917-2944) BasePeak:55.05(3016)

BG Mode:Calc. from Peak Group 1 - Event 1 Scan

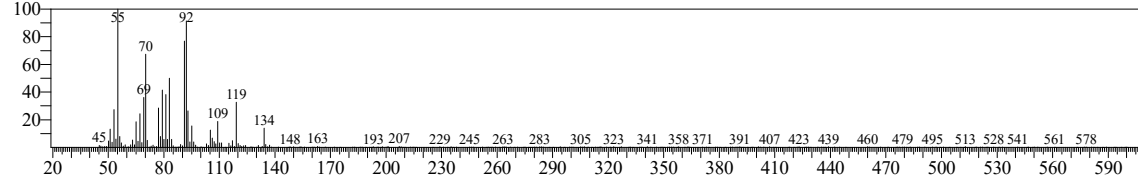

Hit#:1 Entry:970 Library:FFNSC 1.2.lib

SI:96 Formula:C10H16O CAS:1674-08-4 MolWeight:152 RetIndex:1141

CompName:Pinocarveol <trans->; Bicyclo[3.1.1]heptan-3-ol <6,6-dimethyl-, 2-methylene-, (1.alpha.,3.alpha.,5.alpha.)->

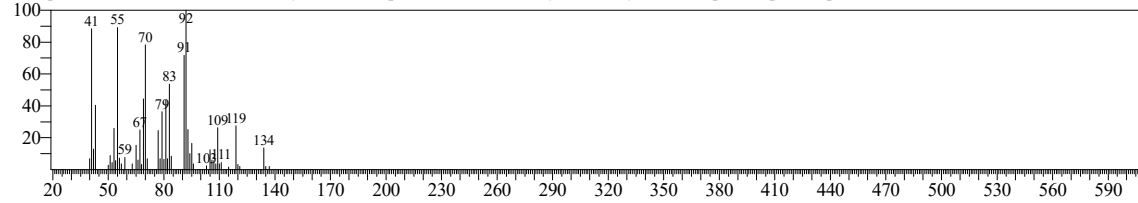

Hit#:2 Entry:67258 Library:W11N17MAIN1.lib

SI:94 Formula:C10H16O CAS:547-61-5 MolWeight:152 RetIndex:1131

CompName:Bicyclo[3.1.1]heptan-3-ol, 6,6-dimethyl-2-methylene-, [1S-(1.alpha.,3.alpha.,5.alpha.)]-

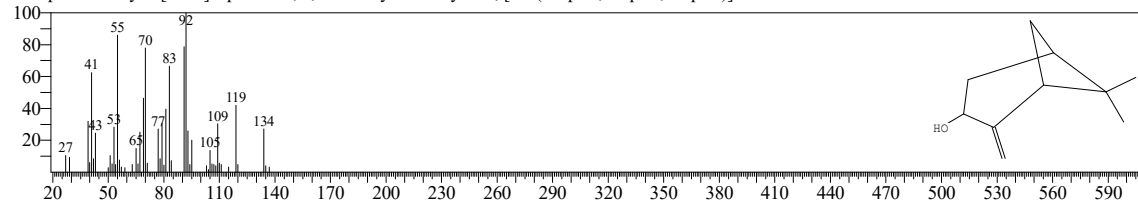

Hit#:3 Entry:29107 Library:NIST17.lib

SI:94 Formula:C10H16O CAS:547-61-5 MolWeight:152 RetIndex:1131

CompName:Bicyclo[3.1.1]heptan-3-ol, 6,6-dimethyl-2-methylene-, [1S-(1.alpha.,3.alpha.,5.alpha.)]-

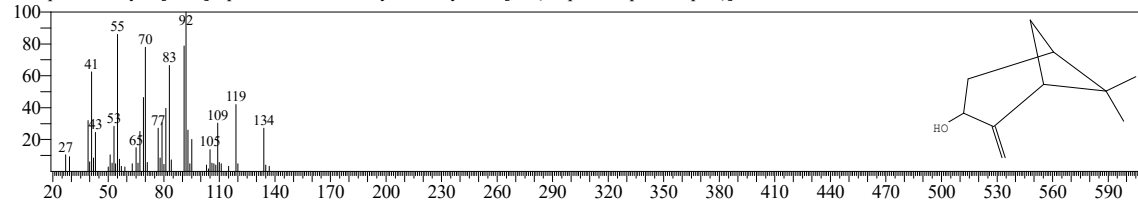

Hit#:4 Entry:29008 Library:NIST17.lib

SI:94 Formula:C10H16O CAS:547-61-5 MolWeight:152 RetIndex:1131

CompName:Bicyclo[3.1.1]heptan-3-ol, 6,6-dimethyl-2-methylene-, [1S-(1.alpha.,3.alpha.,5.alpha.)]-

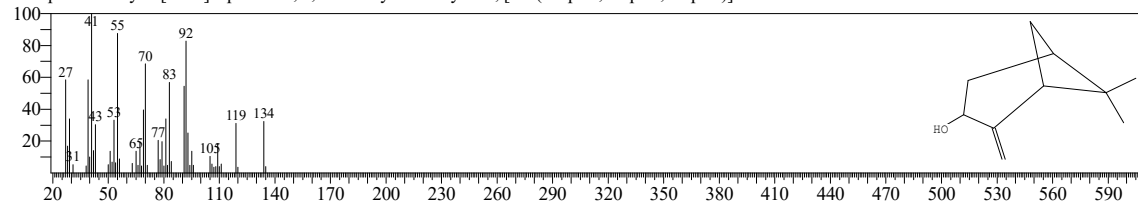

<< Target >>

Line#:11 R.Time:17.435(Scan#:2928) Retention Index:1130 MassPeaks:289

RawMode:Averaged 17.380-17.515(2917-2944) BasePeak:55.05(3016)

BG Mode:Calc. from Peak Group 1 - Event 1 Scan

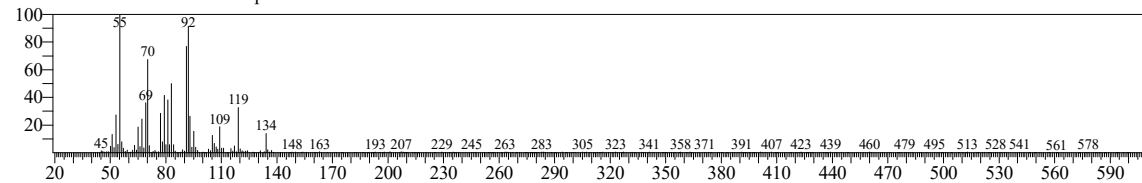

Hit#:5 Entry:67254 Library:W11N17MAIN1.lib

SI:94 Formula:C10H16O CAS:547-61-5 MolWeight:152 RetIndex:1131

CompName:2(10)-Pinen-3-ol, (1S,3R,5S)-(-)

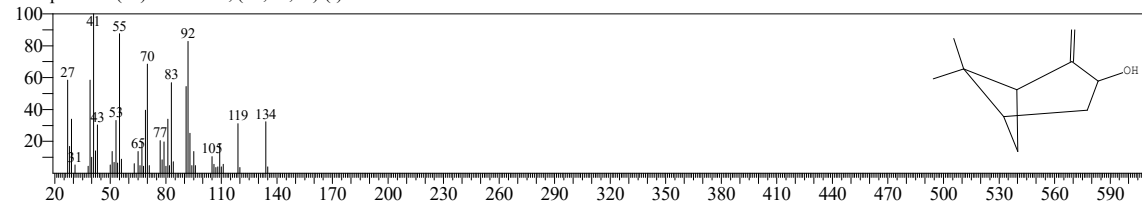

Hit#:6 Entry:67260 Library:W11N17MAIN1.lib

SI:94 Formula:C10H16O CAS:547-61-5 MolWeight:152 RetIndex:1131

CompName:Bicyclo[3.1.1]heptan-3-ol, 6,6-dimethyl-2-methylene-, [1S-(1.alpha.,3.alpha.,5.alpha.)]-

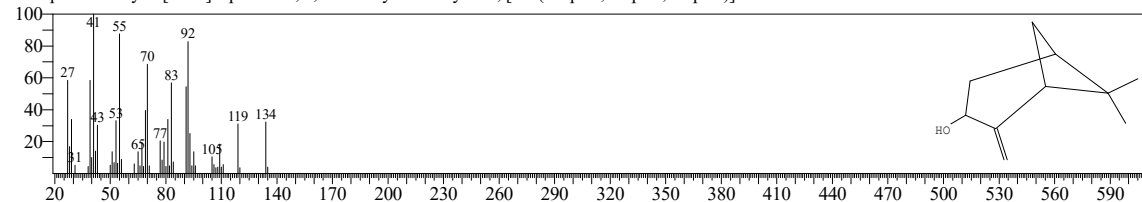

Hit#:7 Entry:67263 Library:W11N17MAIN1.lib

SI:93 Formula:C10H16O CAS:5947-36-4 MolWeight:152 RetIndex:1131

CompName:10-Pinen-3-ol

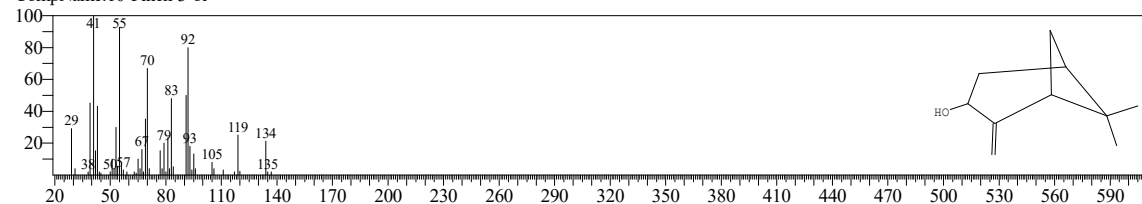

Hit#:8 Entry:67259 Library:W11N17MAIN1.lib

SI:92 Formula:C10H16O CAS:547-61-5 MolWeight:152 RetIndex:1131

CompName:Bicyclo[3.1.1]heptan-3-ol, 6,6-dimethyl-2-methylene-, [1S-(1.alpha.,3.alpha.,5.alpha.)]-

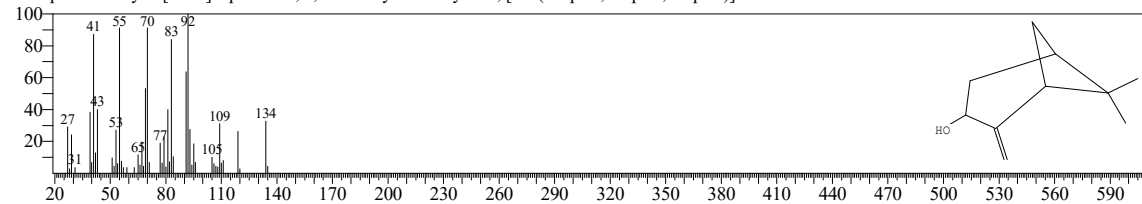



<< Target >>

Line#:11 R.Time:17.435(Scan#:2928) Retention Index:1130 MassPeaks:289

RawMode:Averaged 17.380-17.515(2917-2944) BasePeak:55.05(3016)

BG Mode:Calc. from Peak Group 1 - Event 1 Scan

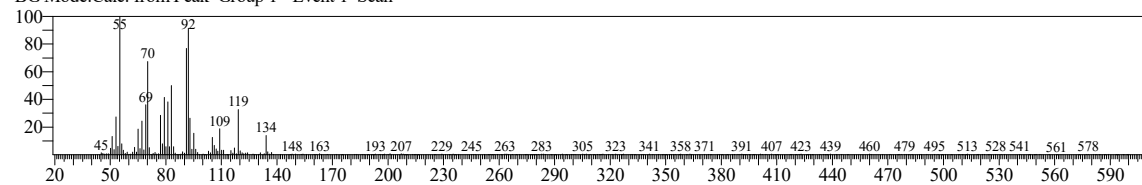

Hit#:9 Entry:67261 Library:W11N17MAIN1.lib

SI:92 Formula:C10H16O CAS:547-61-5 MolWeight:152 RetIndex:1131

CompName:Bicyclo[3.1.1]heptan-3-ol, 6,6-dimethyl-2-methylene-, [1S-(1.alpha.,3.alpha.,5.alpha.)]-

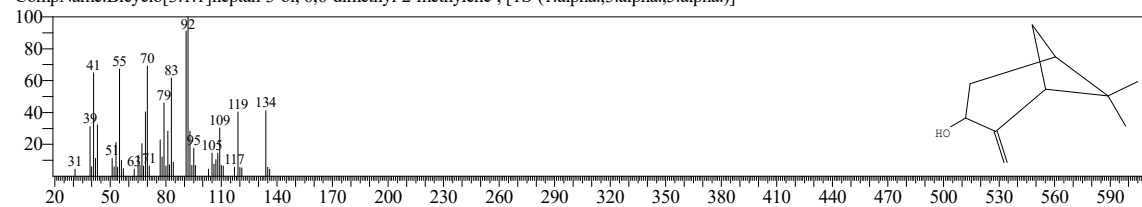

Hit#:10 Entry:29108 Library:NIST17.lib

SI:92 Formula:C10H16O CAS:547-61-5 MolWeight:152 RetIndex:1131

CompName:Bicyclo[3.1.1]heptan-3-ol, 6,6-dimethyl-2-methylene-, [1S-(1.alpha.,3.alpha.,5.alpha.)]-

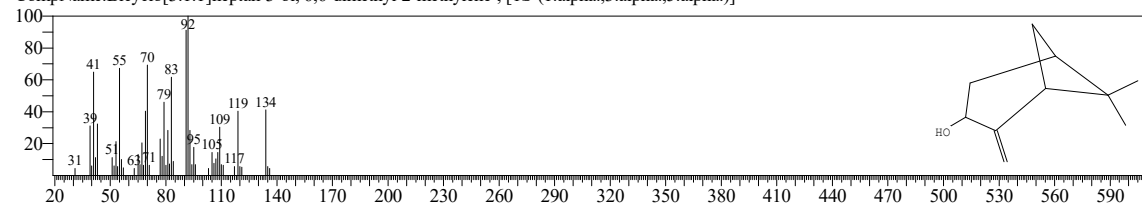

<< Target >>

Line#:12 R.Time:17.575(Scan#:2956) Retention Index:1133 MassPeaks:294

RawMode:Averaged 17.515-17.645(2944-2970) BasePeak:79.05(1403)

BG Mode:Calc. from Peak Group 1 - Event 1 Scan

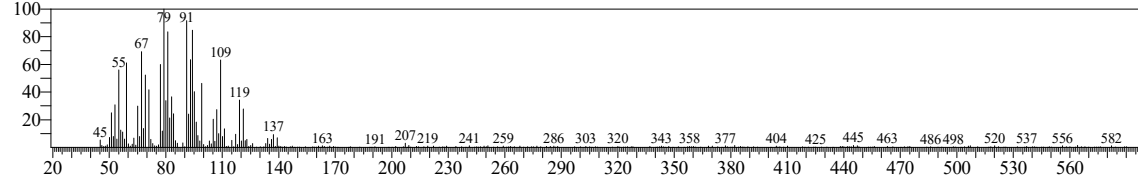

Hit#:1 Entry:29015 Library:NIST17.lib

SI:89 Formula:C10H16O CAS:1845-30-3 MolWeight:152 RetIndex:1136

CompName:cis-Verbenol

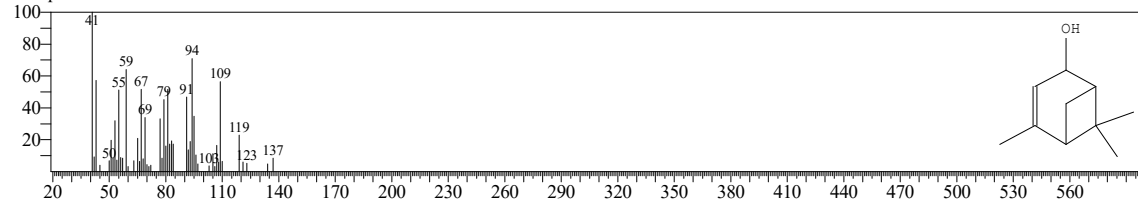

Hit#:2 Entry:67824 Library:W11N17MAIN1.lib

SI:89 Formula:C10H16O CAS:1845-30-3 MolWeight:152 RetIndex:1136

CompName:cis-Verbenol

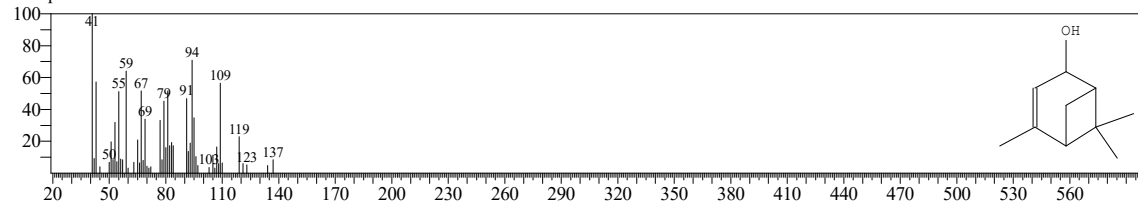

Hit#:3 Entry:29016 Library:NIST17.lib

SI:86 Formula:C10H16O CAS:473-67-6 MolWeight:152 RetIndex:1136

CompName:Verbenol

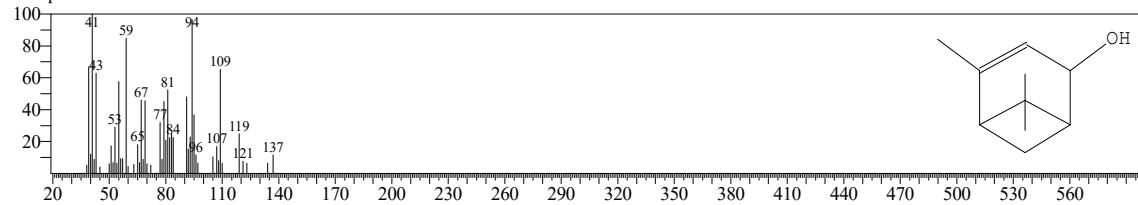

Hit#:4 Entry:67823 Library:W11N17MAIN1.lib

SI:86 Formula:C10H16O CAS:473-67-6 MolWeight:152 RetIndex:1136

CompName:Verbenol

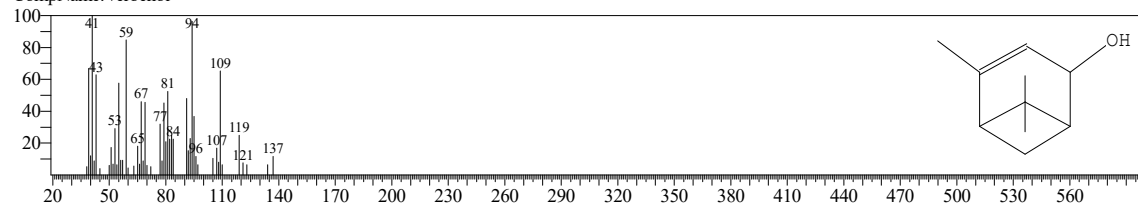

<< Target >>

Line#:12 R.Time:17.575(Scan#:2956) Retention Index:1133 MassPeaks:294

RawMode:Averaged 17.515-17.645(2944-2970) BasePeak:79.05(1403)

BG Mode:Calc. from Peak Group 1 - Event 1 Scan

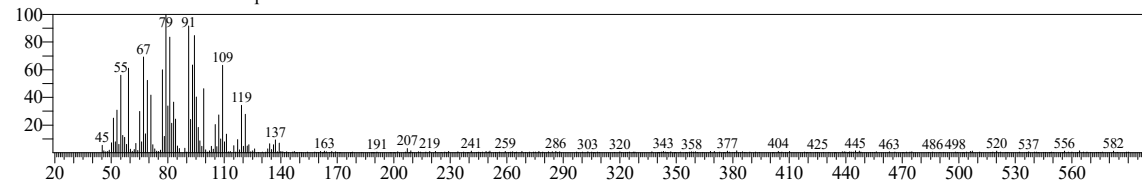

Hit#:5 Entry:28908 Library:NIST17.lib

SI:86 Formula:C10H16O CAS:1845-30-3 MolWeight:152 RetIndex:1136

CompName:cis-Verbenol

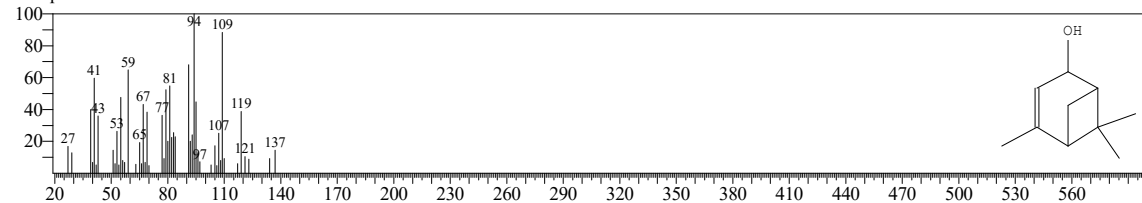

Hit#:6 Entry:67826 Library:W11N17MAIN1.lib

SI:86 Formula:C10H16O CAS:1845-30-3 MolWeight:152 RetIndex:1136

CompName:cis-Verbenol

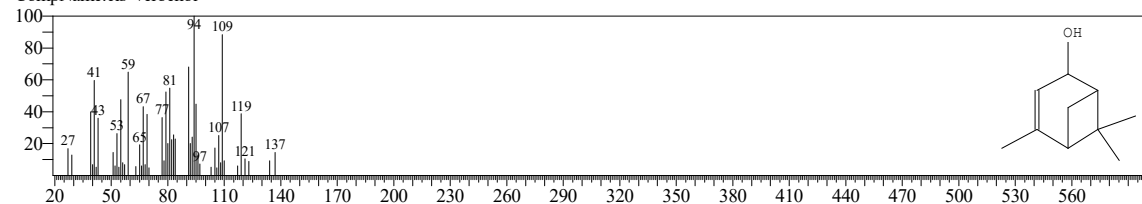

Hit#:7 Entry:67822 Library:W11N17MAIN1.lib

SI:86 Formula:C10H16O CAS:18881-04-4 MolWeight:152 RetIndex:1136

CompName:Bicyclo[3.1.1]hept-3-en-2-ol, 4,6,6-trimethyl-, [1S-(1.alpha.,2.beta.,5.alpha.)]-

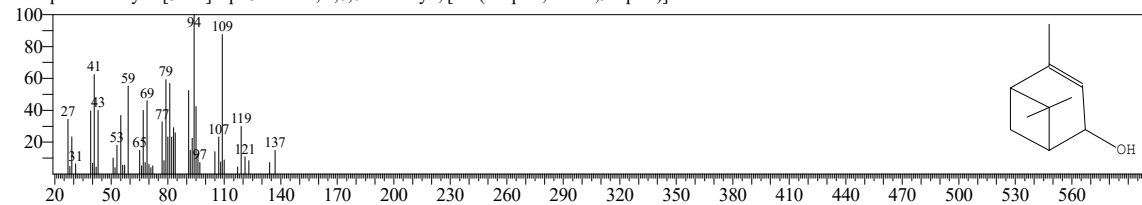

Hit#:8 Entry:28907 Library:NIST17.lib

SI:86 Formula:C10H16O CAS:18881-04-4 MolWeight:152 RetIndex:1136

CompName:Bicyclo[3.1.1]hept-3-en-2-ol, 4,6,6-trimethyl-, [1S-(1.alpha.,2.beta.,5.alpha.)]-

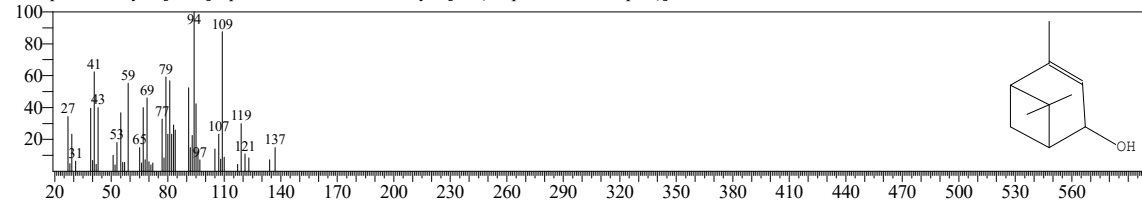

<< Target >>

Line#:12 R.Time:17.575(Scan#:2956) Retention Index:1133 MassPeaks:294

RawMode:Averaged 17.515-17.645(2944-2970) BasePeak:79.05(1403)

BG Mode:Calc. from Peak Group 1 - Event 1 Scan

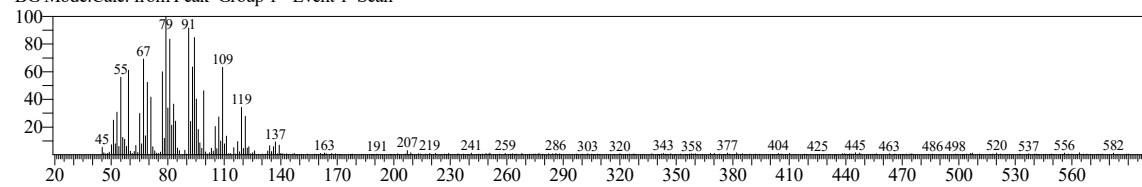

Hit#:9 Entry:67827 Library:W11N17MAIN1.lib

SI:85 Formula:C10H16O CAS:13040-03-4 MolWeight:152 RetIndex:1136

CompName:(1R)-cis-Verbenol

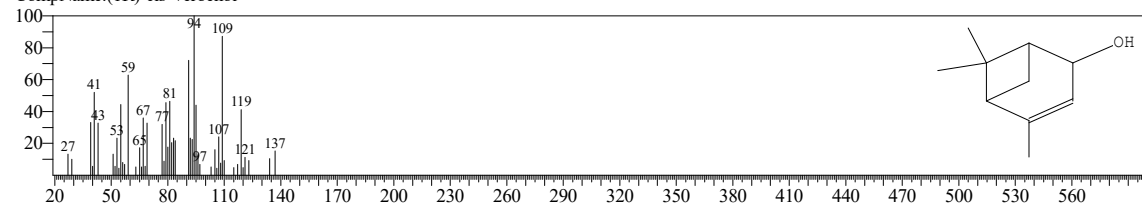

Hit#:10 Entry:28909 Library:NIST17.lib

SI:85 Formula:C10H16O CAS:13040-03-4 MolWeight:152 RetIndex:1136

CompName:(1R)-cis-Verbenol

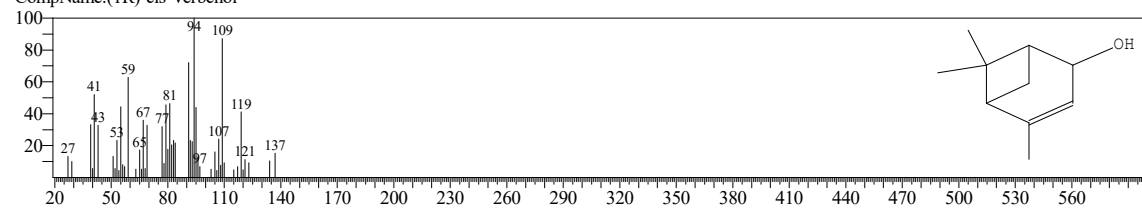

<< Target >>

Line#:13 R.Time:17.725(Scan#:2986) Retention Index:1136 MassPeaks:348

RawMode:Averaged 17.645-17.865(2970-3014) BasePeak:109.10(6994)

BG Mode:Calc. from Peak Group 1 - Event 1 Scan

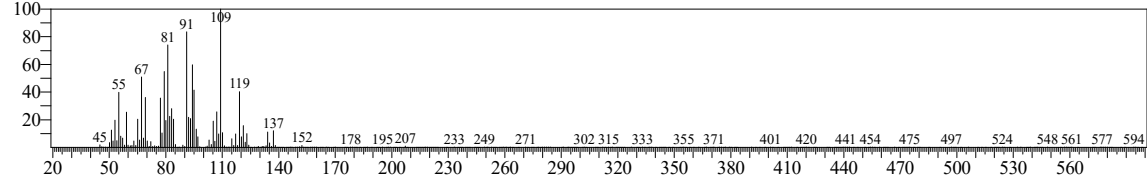

Hit#:1 Entry:971 Library:FFNSC 1.2.lib

SI:95 Formula:C10H16O CAS:473-67-6 MolWeight:152 RetIndex:1146

CompName:Verbenol; Bicyclo-[3.1.1]-hept-3-en-2-ol <4,6,6-trimethyl->

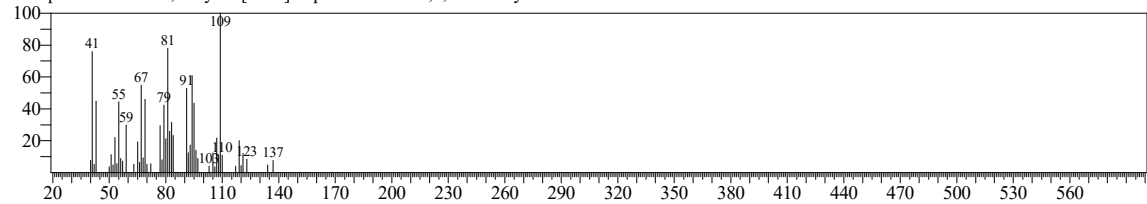

Hit#:2 Entry:28908 Library:NIST17.lib

SI:94 Formula:C10H16O CAS:1845-30-3 MolWeight:152 RetIndex:1136

CompName:cis-Verbenol

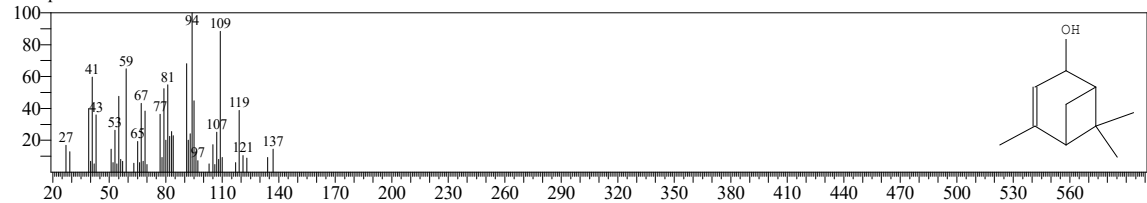

Hit#:3 Entry:67826 Library:W11N17MAIN1.lib

SI:94 Formula:C10H16O CAS:1845-30-3 MolWeight:152 RetIndex:1136

CompName:cis-Verbenol

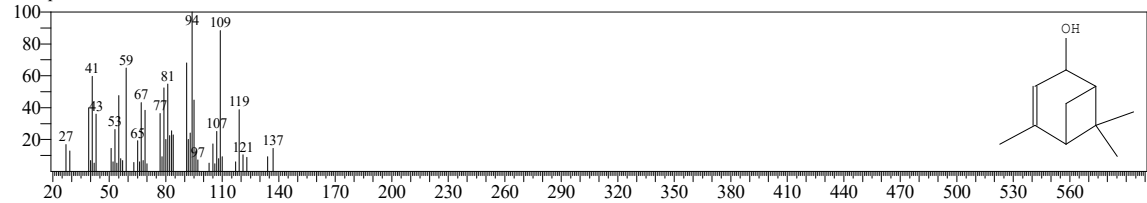

Hit#:4 Entry:67827 Library:W11N17MAIN1.lib

SI:94 Formula:C10H16O CAS:13040-03-4 MolWeight:152 RetIndex:1136

CompName:(1R)-cis-Verbenol

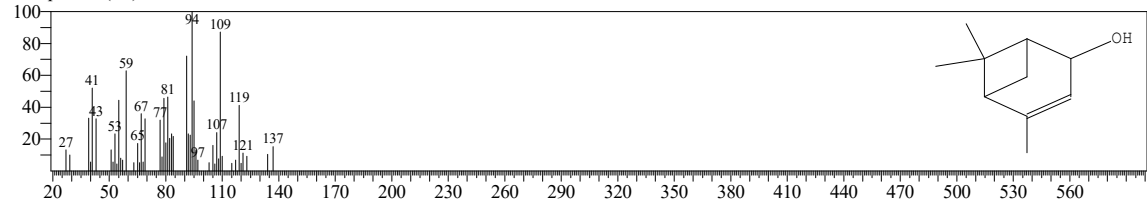

<< Target >>

Line#:13 R.Time:17.725(Scan#:2986) Retention Index:1136 MassPeaks:348

RawMode:Averaged 17.645-17.865(2970-3014) BasePeak:109.10(6994)

BG Mode:Calc. from Peak Group 1 - Event 1 Scan

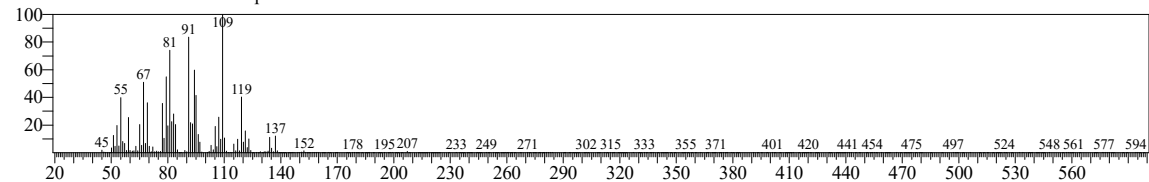

Hit#:5 Entry:28909 Library:NIST17.lib

SI:94 Formula:C10H16O CAS:13040-03-4 MolWeight:152 RetIndex:1136

CompName:(1R)-cis-Verbenol

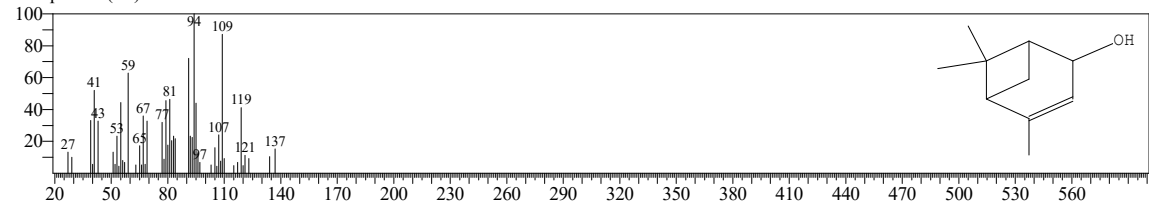

Hit#:6 Entry:28960 Library:NIST17.lib

SI:92 Formula:C10H16O CAS:1820-09-3 MolWeight:152 RetIndex:1136

CompName:trans-Verbenol

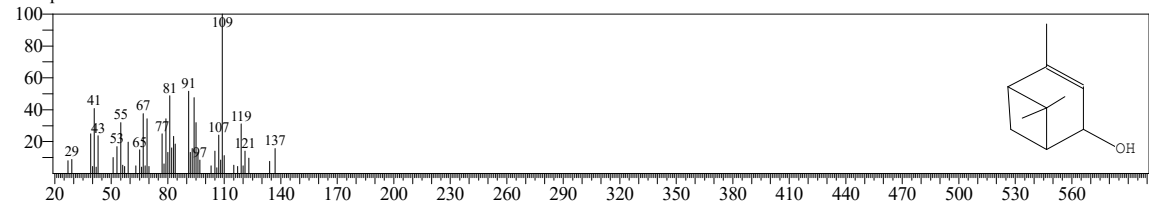

Hit#:7 Entry:67828 Library:W11N17MAIN1.lib

SI:92 Formula:C10H16O CAS:1820-09-3 MolWeight:152 RetIndex:1136

CompName:trans-Verbenol

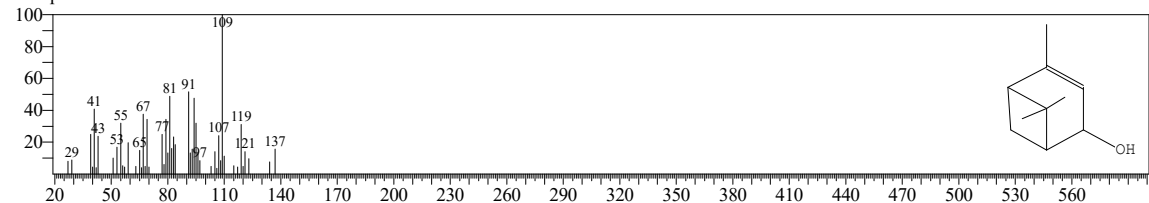

Hit#:8 Entry:28907 Library:NIST17.lib

SI:92 Formula:C10H16O CAS:18881-04-4 MolWeight:152 RetIndex:1136

CompName:Bicyclo[3.1.1]hept-3-en-2-ol, 4,6,6-trimethyl-, [1S-(1.alpha.,2.beta.,5.alpha.)]-

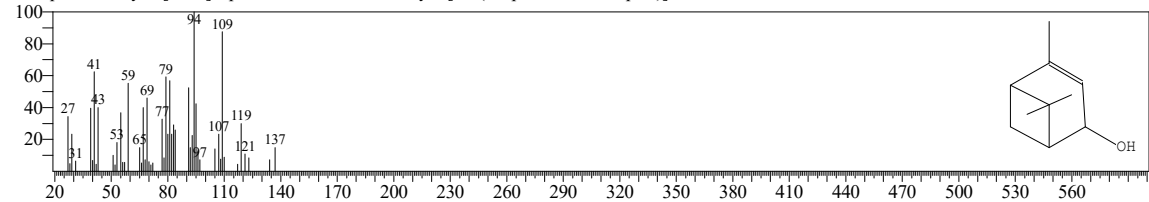

<< Target >>

Line#:13 R.Time:17.725(Scan#:2986) Retention Index:1136 MassPeaks:348

RawMode:Averaged 17.645-17.865(2970-3014) BasePeak:109.10(6994)

BG Mode:Calc. from Peak Group 1 - Event 1 Scan

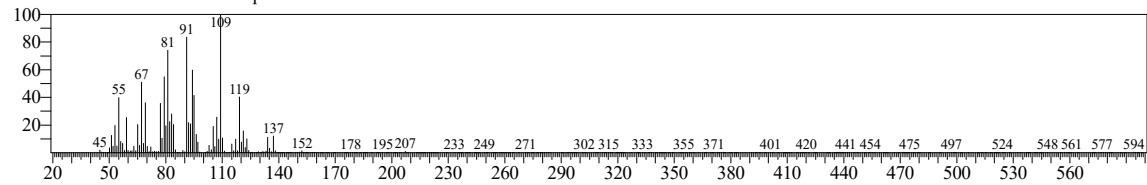

Hit#:9 Entry:67822 Library:W11N17MAIN1.lib

SI:92 Formula:C10H16O CAS:18881-04-4 MolWeight:152 RetIndex:1136

CompName:Bicyclo[3.1.1]hept-3-en-2-ol, 4,6,6-trimethyl-, [1S-(1.alpha.,2.beta.,5.alpha.)]-

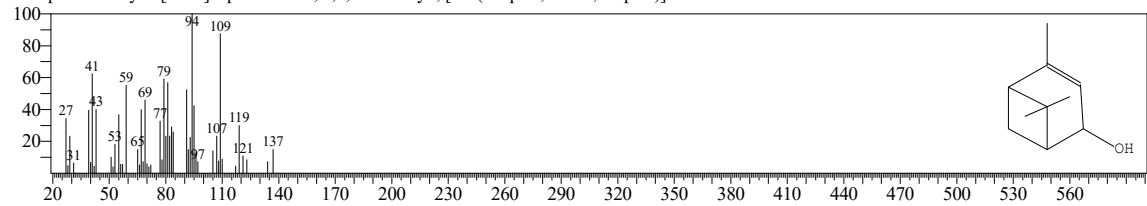

Hit#:10 Entry:28957 Library:NIST17.lib

SI:90 Formula:C10H16O CAS:55722-60-6 MolWeight:152 RetIndex:1136

CompName:cis-Chrysanthenol

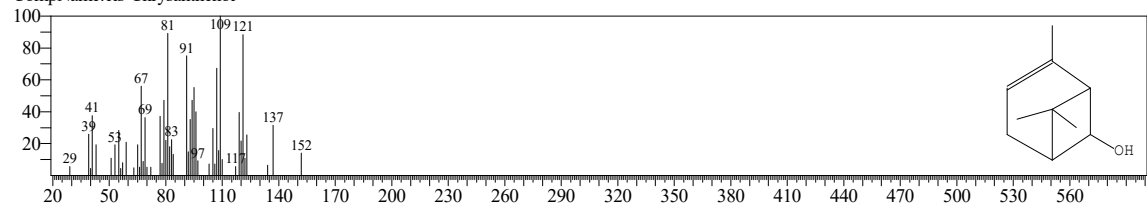

<< Target >>

Line#:14 R.Time:19.260(Scan#:3293) Retention Index:1169 MassPeaks:288

RawMode:Averaged 19.220-19.390(3285-3319) BasePeak:71.05(7862)

BG Mode:Calc. from Peak Group 1 - Event 1 Scan

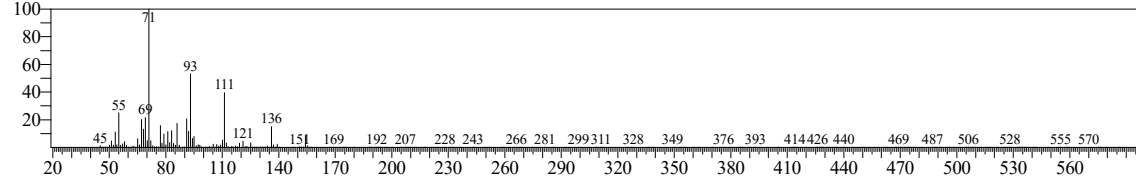

Hit#:1 Entry:30910 Library:NIST17.lib

SI:94 Formula:C10H18O CAS:562-74-3 MolWeight:154 RetIndex:1137

CompName:Terpinen-4-ol

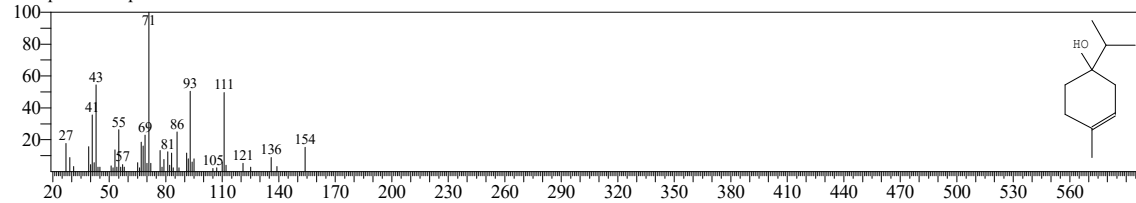

Hit#:2 Entry:72615 Library:W11N17MAIN1.lib

SI:94 Formula:C10H18O CAS:562-74-3 MolWeight:154 RetIndex:1137

CompName:Terpinen-4-ol

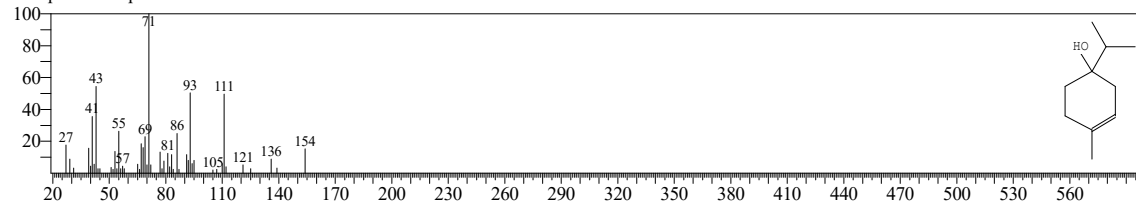

Hit#:3 Entry:72618 Library:W11N17MAIN1.lib

SI:93 Formula:C10H18O CAS:562-74-3 MolWeight:154 RetIndex:1137

CompName:3-Cyclohexen-1-ol, 4-methyl-1-(1-methylethyl)-

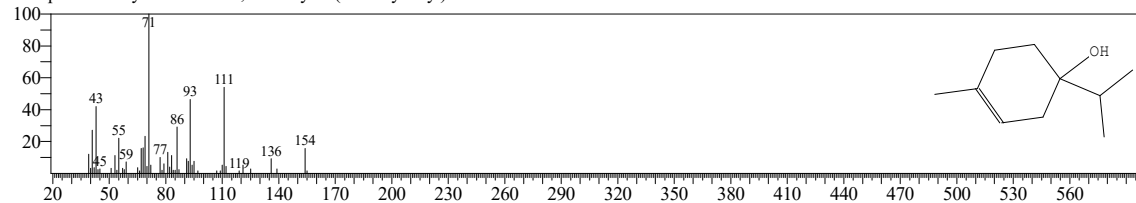

Hit#:4 Entry:72610 Library:W11N17MAIN1.lib

SI:93 Formula:C10H18O CAS:20126-76-5 MolWeight:154 RetIndex:1137

CompName:3-Cyclohexen-1-ol, 4-methyl-1-(1-methylethyl)-, (R)-

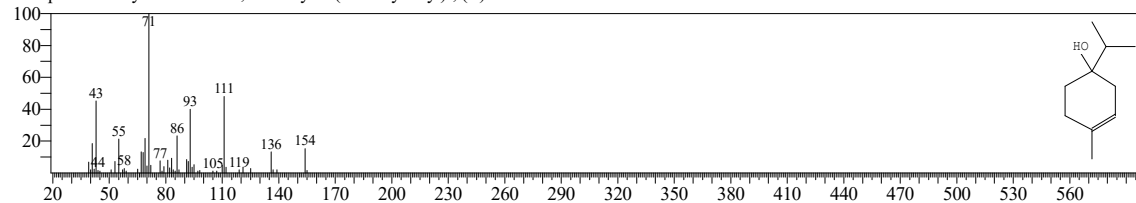



<< Target >>

Line#:14 R.Time:19.260(Scan#:3293) Retention Index:1169 MassPeaks:288

RawMode:Averaged 19.220-19.390(3285-3319) BasePeak:71.05(7862)

BG Mode:Calc. from Peak Group 1 - Event 1 Scan

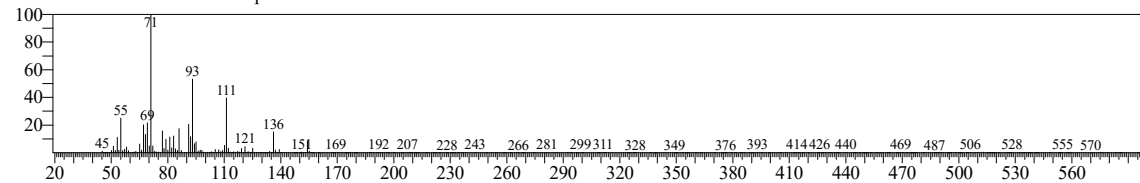

Hit#:5 Entry:72619 Library:W11N17MAIN1.lib

SI:93 Formula:C10H18O CAS:562-74-3 MolWeight:154 RetIndex:1137

CompName:Terpinen-4-ol

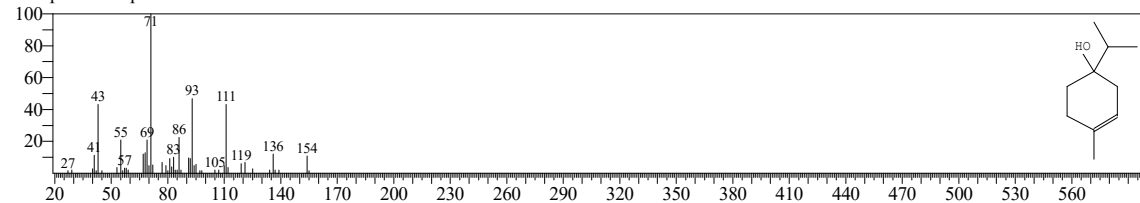

Hit#:6 Entry:30917 Library:NIST17.lib

SI:93 Formula:C10H18O CAS:562-74-3 MolWeight:154 RetIndex:1137

CompName:Terpinen-4-ol

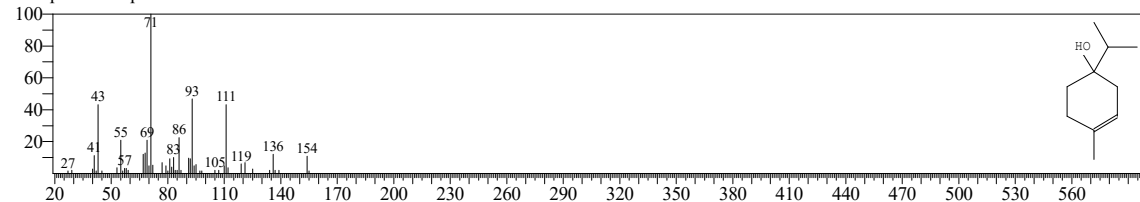

Hit#:7 Entry:72616 Library:W11N17MAIN1.lib

SI:93 Formula:C10H18O CAS:562-74-3 MolWeight:154 RetIndex:1137

CompName:3-Cyclohexen-1-ol, 4-methyl-1-(1-methylethyl)-

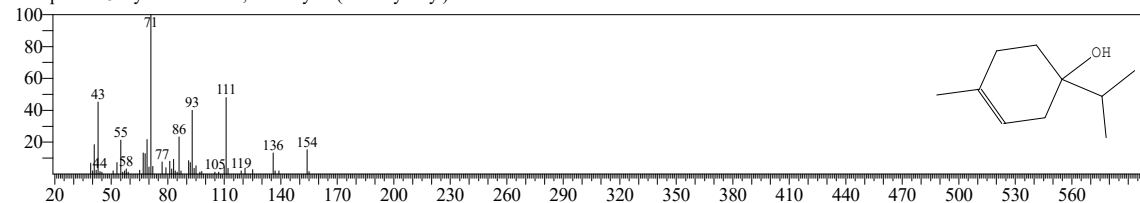

Hit#:8 Entry:30680 Library:NIST17.lib

SI:93 Formula:C10H18O CAS:20126-76-5 MolWeight:154 RetIndex:1137

CompName:3-Cyclohexen-1-ol, 4-methyl-1-(1-methylethyl)-, (R)-

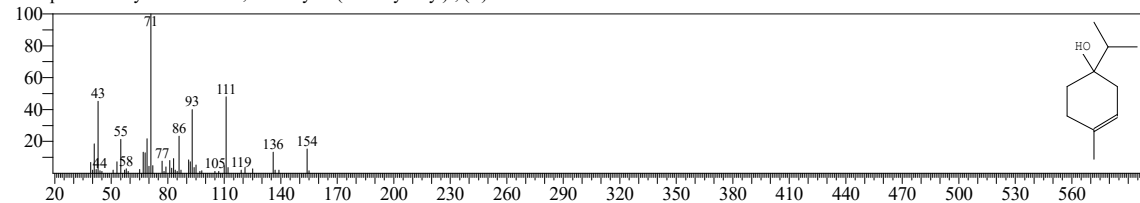

<< Target >>

Line#:14 R.Time:19.260(Scan#:3293) Retention Index:1169 MassPeaks:288

RawMode:Averaged 19.220-19.390(3285-3319) BasePeak:71.05(7862)

BG Mode:Calc. from Peak Group 1 - Event 1 Scan

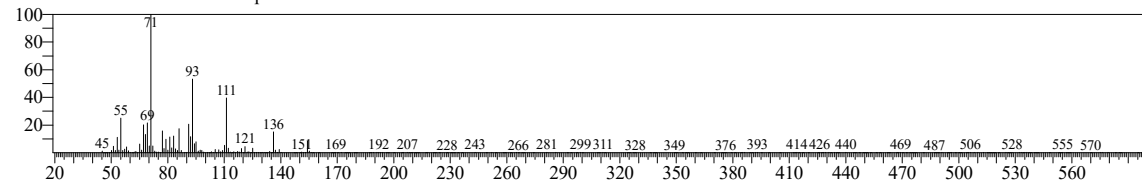

Hit#:9 Entry:72612 Library:W11N17MAIN1.lib

SI:92 Formula:C10H18O CAS:562-74-3 MolWeight:154 RetIndex:1137

CompName:Terpinen-4-ol

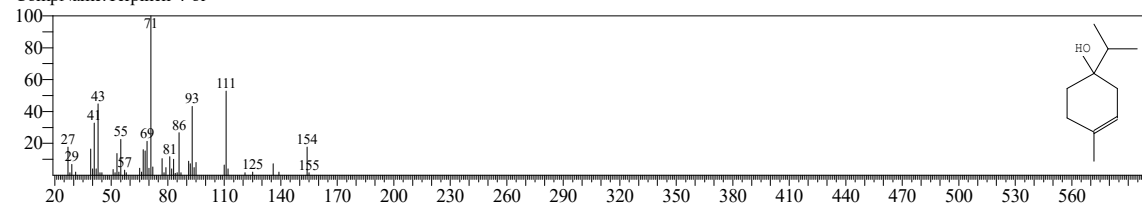

Hit#:10 Entry:30919 Library:NIST17.lib

SI:92 Formula:C10H18O CAS:562-74-3 MolWeight:154 RetIndex:1137

CompName:Terpinen-4-ol

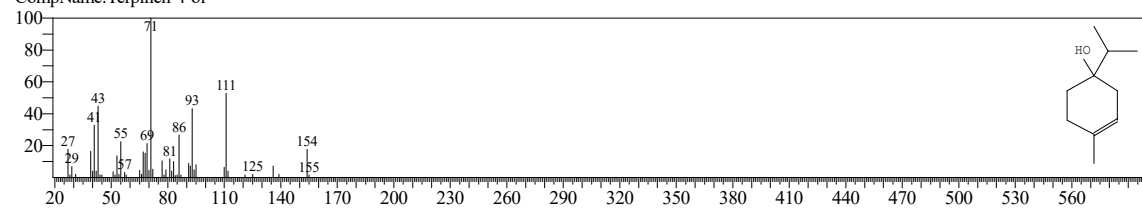

<< Target >>

Line#:15 R.Time:19.890(Scan#:3419) Retention Index:1183 MassPeaks:337

RawMode:Averaged 19.850-20.010(3411-3443) BasePeak:59.05(4351)

BG Mode:Calc. from Peak Group 1 - Event 1 Scan

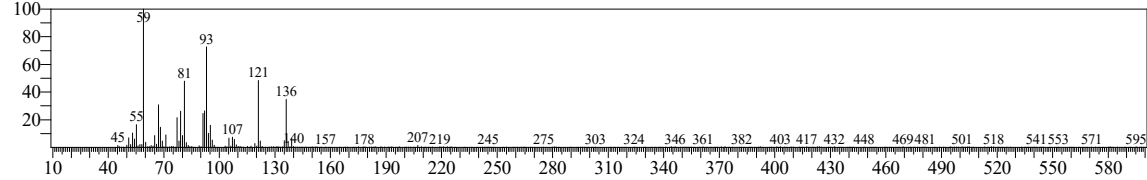

Hit#:1 Entry:71939 Library:W11N17MAIN1.lib

SI:95 Formula:C10H18O CAS:470-08-6 MolWeight:154 RetIndex:1138

CompName:(1S)-1,3,3-trimethylnorboman-2-ol

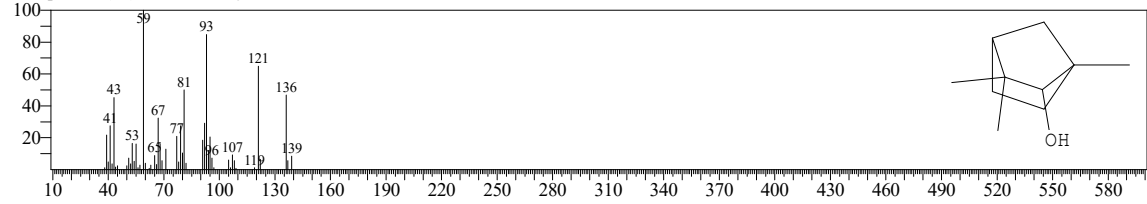

Hit#:2 Entry:497 Library:FFNSC 1.2.lib

SI:95 Formula:C10H18O CAS:98-55-5 MolWeight:154 RetIndex:1198

CompName:Terpineol <alpha->; Cyclohex-3-ene-1-methanol <alpha,alpha,4-trimethyl->

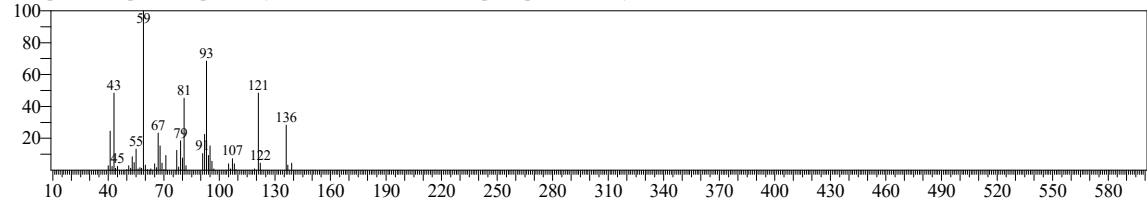

Hit#:3 Entry:30626 Library:NIST17.lib

SI:93 Formula:C10H18O CAS:98-55-5 MolWeight:154 RetIndex:1143

CompName:alpha.-Terpineol

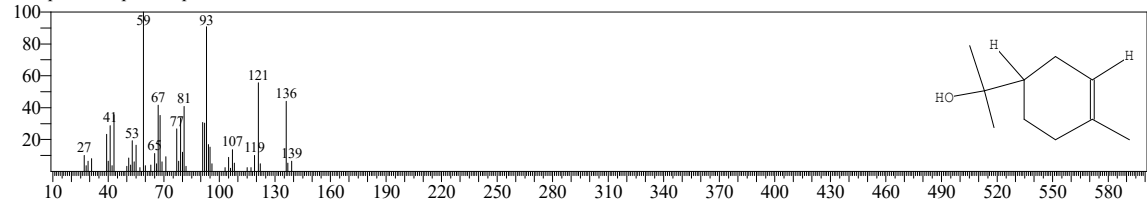

Hit#:4 Entry:72628 Library:W11N17MAIN1.lib

SI:93 Formula:C10H18O CAS:98-55-5 MolWeight:154 RetIndex:1143

CompName:alpha.-Terpineol

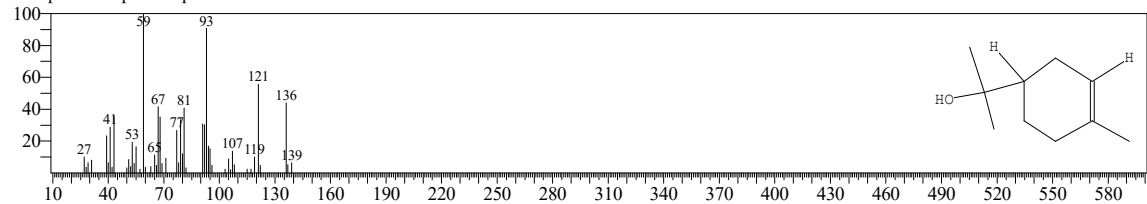

<< Target >>

Line#:15 R.Time:19.890(Scan#:3419) Retention Index:1183 MassPeaks:337

RawMode:Averaged 19.850-20.010(3411-3443) BasePeak:59.05(4351)

BG Mode:Calc. from Peak Group 1 - Event 1 Scan

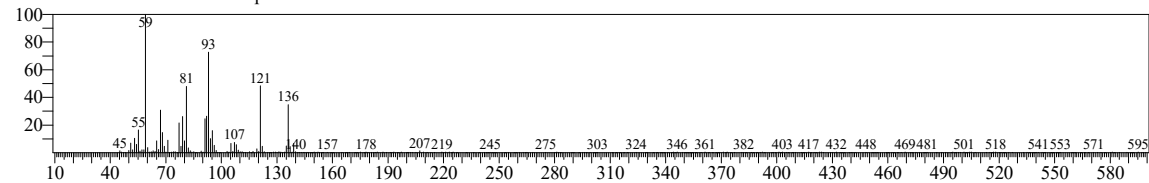

Hit#:5 Entry:30878 Library:NIST17.lib

SI:92 Formula:C10H18O CAS:98-55-5 MolWeight:154 RetIndex:1143

CompName:alpha.-Terpineol

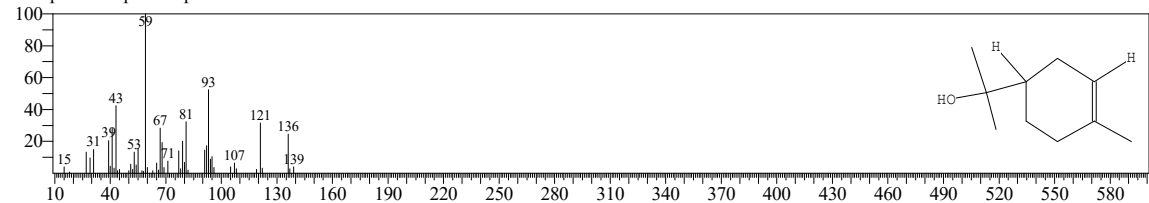

Hit#:6 Entry:72630 Library:W11N17MAIN1.lib

SI:92 Formula:C10H18O CAS:98-55-5 MolWeight:154 RetIndex:1143

CompName:alpha.-Terpineol

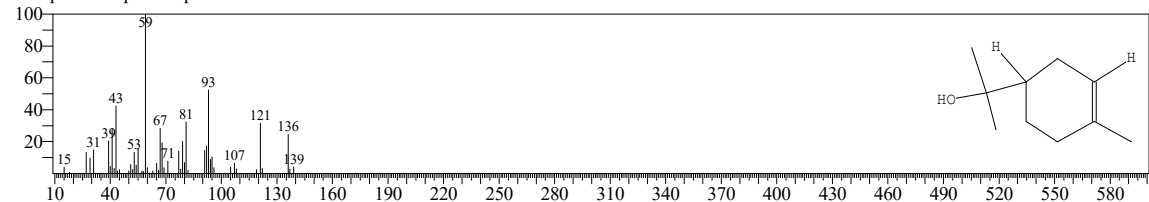

Hit#:7 Entry:30879 Library:NIST17.lib

SI:92 Formula:C10H18O CAS:10482-56-1 MolWeight:154 RetIndex:1143

CompName:L.-alpha.-Terpineol

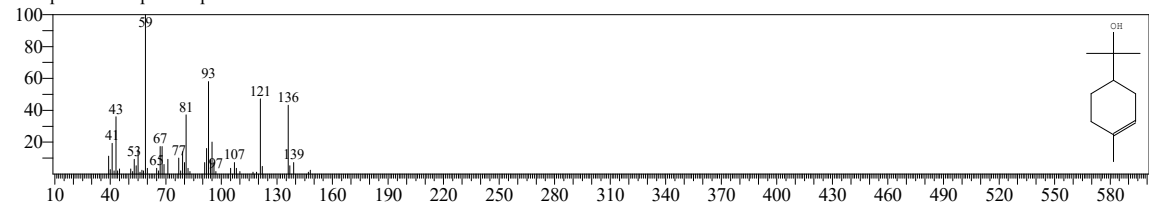

Hit#:8 Entry:72624 Library:W11N17MAIN1.lib

SI:92 Formula:C10H18O CAS:10482-56-1 MolWeight:154 RetIndex:1143

CompName:L.-alpha.-Terpineol

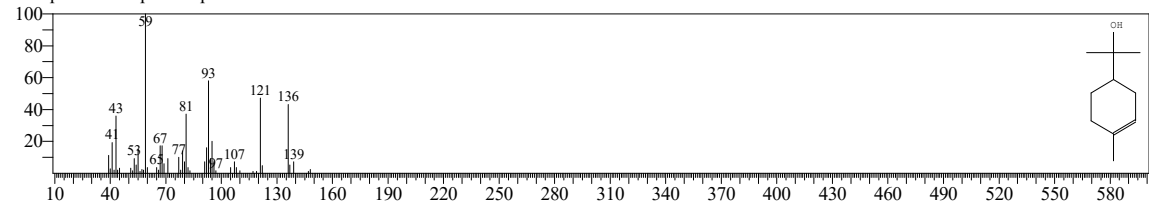

<< Target >>

Line#:15 R.Time:19.890(Scan#:3419) Retention Index:1183 MassPeaks:337

RawMode:Averaged 19.850-20.010(3411-3443) BasePeak:59.05(4351)

BG Mode:Calc. from Peak Group 1 - Event 1 Scan

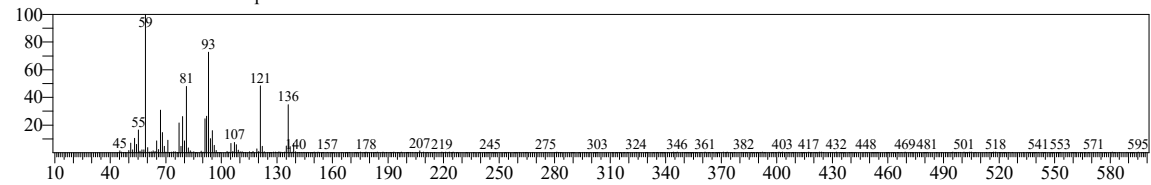

Hit#:9 Entry:30880 Library:NIST17.lib

SI:92 Formula:C10H18O CAS:98-55-5 MolWeight:154 RetIndex:1143

CompName:.alpha.-Terpineol

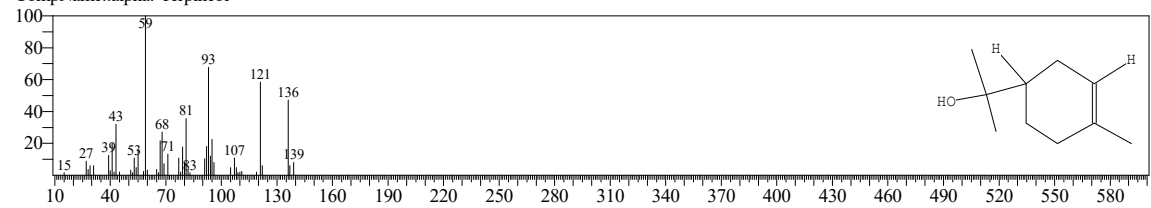

Hit#:10 Entry:72632 Library:W11N17MAIN1.lib

SI:92 Formula:C10H18O CAS:98-55-5 MolWeight:154 RetIndex:1143

CompName:.alpha.-Terpineol

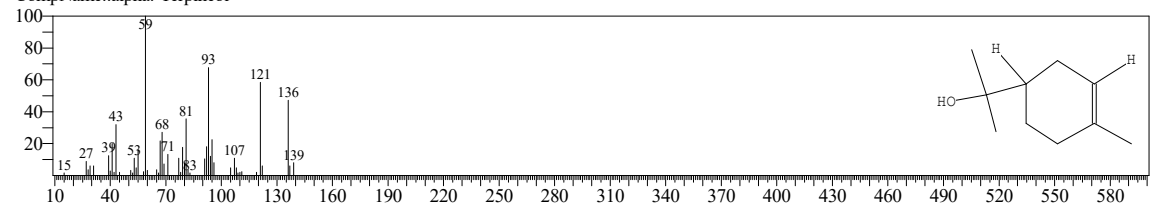

<< Target >>

Line#:16 R.Time:20.125(Scan#:3466) Retention Index:1188 MassPeaks:380

RawMode:Averaged 20.010-20.240(3443-3489) BasePeak:79.05(3732)

BG Mode:Calc. from Peak Group 1 - Event 1 Scan

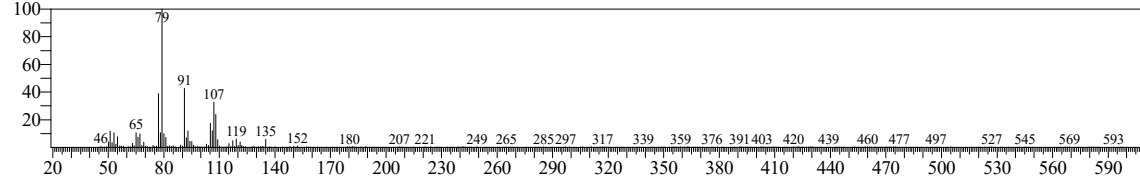

Hit#:1 Entry:790 Library:FFNSC 1.2.lib

SI:93 Formula:C10H14O CAS:564-94-3 MolWeight:150 RetIndex:1197

CompName:Myrtenal; Bicyclo(3.1.1)hept-2-ene-2-carboxaldehyde <6,6-dimethyl->

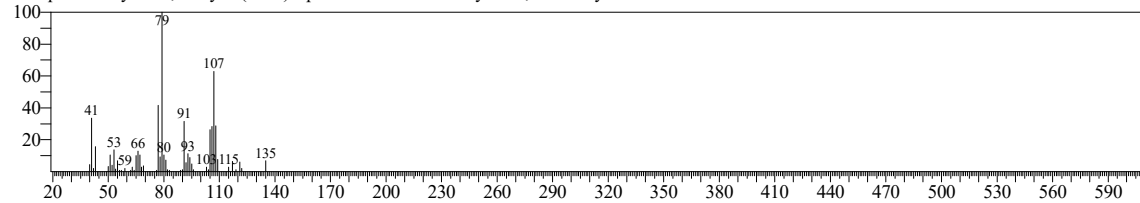

Hit#:2 Entry:67646 Library:W11N17MAIN1.lib

SI:90 Formula:C10H16O CAS:19894-97-4 MolWeight:152 RetIndex:1191

CompName:(-)-Myrtenol

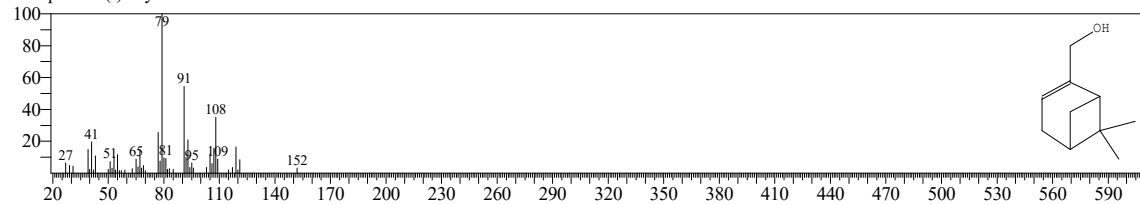

Hit#:3 Entry:28836 Library:NIST17.lib

SI:90 Formula:C10H16O CAS:19894-97-4 MolWeight:152 RetIndex:1191

CompName:(-)-Myrtenol

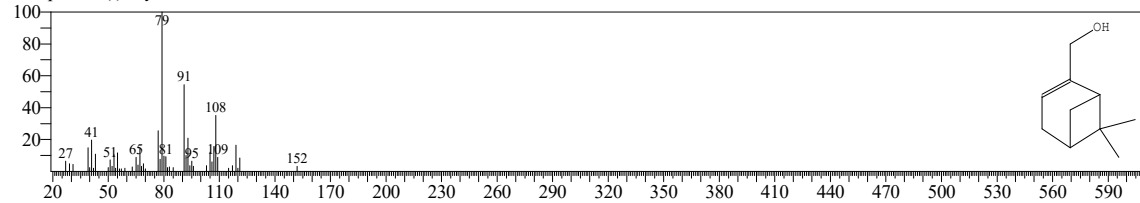

Hit#:4 Entry:27147 Library:NIST17.lib

SI:90 Formula:C10H14O CAS:18486-69-6 MolWeight:150 RetIndex:1136

CompName:(1R)-(-)-Myrtenal

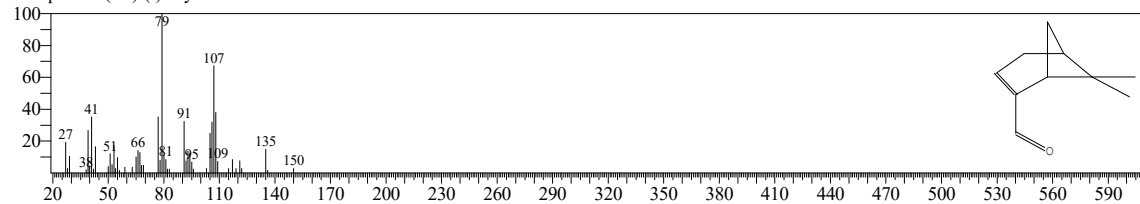

<< Target >>

Line#:16 R.Time:20.125(Scan#:3466) Retention Index:1188 MassPeaks:380

RawMode:Averaged 20.010-20.240(3443-3489) BasePeak:79.05(3732)

BG Mode:Calc. from Peak Group 1 - Event 1 Scan

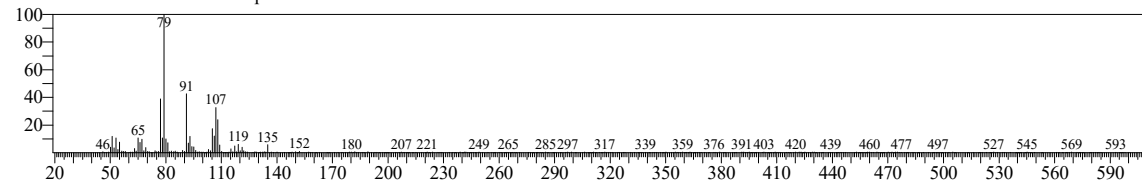

Hit#:5 Entry:62726 Library:W11N17MAIN1.lib

SI:90 Formula:C10H14O CAS:18486-69-6 MolWeight:150 RetIndex:1136

CompName:(1R)-(-)-Myrtenal

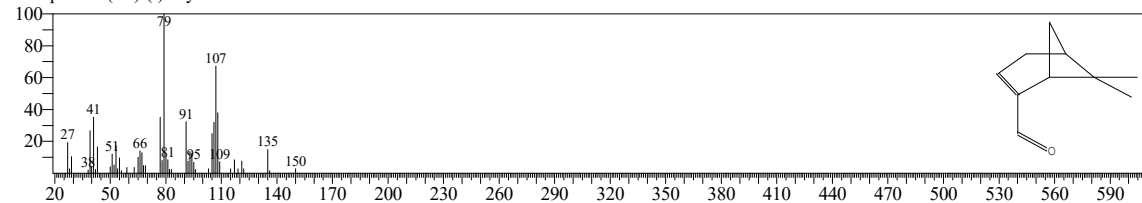

Hit#:6 Entry:62724 Library:W11N17MAIN1.lib

SI:90 Formula:C10H14O CAS:564-94-3 MolWeight:150 RetIndex:1136

CompName:Bicyclo[3.1.1]hept-2-ene-2-carboxaldehyde, 6,6-dimethyl-

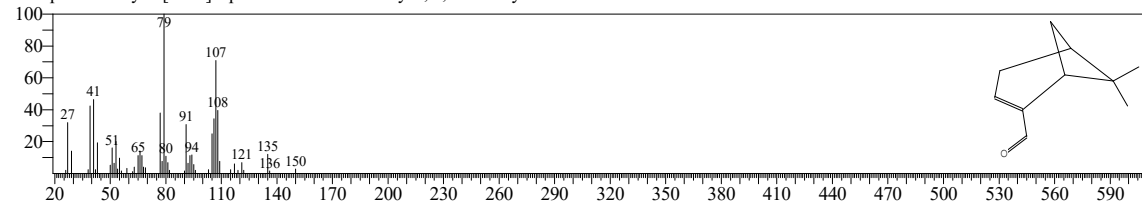

Hit#:7 Entry:27316 Library:NIST17.lib

SI:90 Formula:C10H14O CAS:564-94-3 MolWeight:150 RetIndex:1136

CompName:Bicyclo[3.1.1]hept-2-ene-2-carboxaldehyde, 6,6-dimethyl-

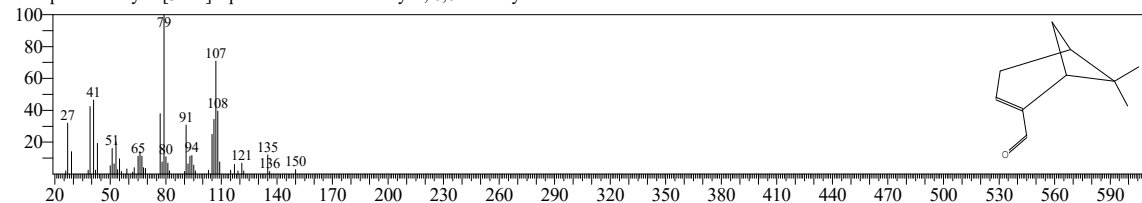

Hit#:8 Entry:62725 Library:W11N17MAIN1.lib

SI:90 Formula:C10H14O CAS:564-94-3 MolWeight:150 RetIndex:1136

CompName:Bicyclo[3.1.1]hept-2-ene-2-carboxaldehyde, 6,6-dimethyl-

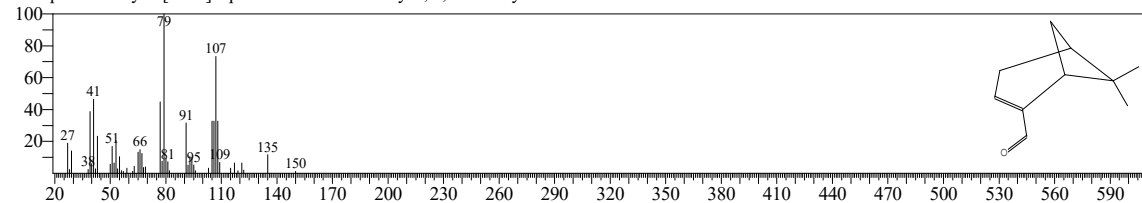

<< Target >>

Line#:16 R.Time:20.125(Scan#:3466) Retention Index:1188 MassPeaks:380

RawMode:Averaged 20.010-20.240(3443-3489) BasePeak:79.05(3732)

BG Mode:Calc. from Peak Group 1 - Event 1 Scan

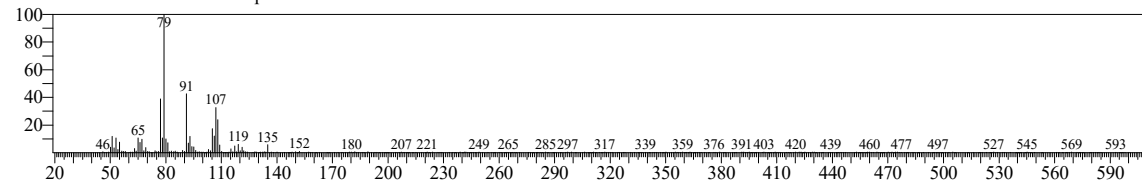

Hit#:9 Entry:27315 Library:NIST17.lib

SI:90 Formula:C10H14O CAS:564-94-3 MolWeight:150 RetIndex:1136

CompName:Bicyclo[3.1.1]hept-2-ene-2-carboxaldehyde, 6,6-dimethyl-

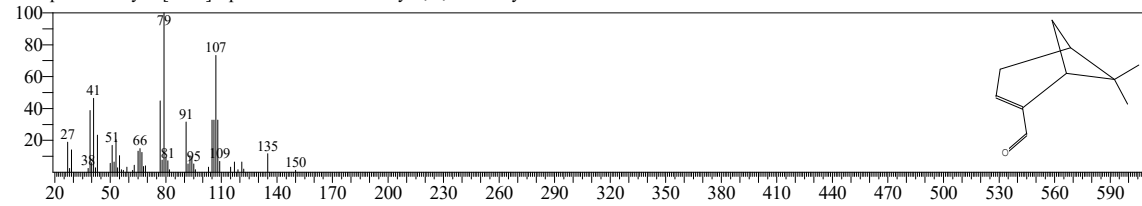

Hit#:10 Entry:813 Library:FFNSC 1.2.lib

SI:89 Formula:C10H16O CAS:515-00-4 MolWeight:152 RetIndex:1202

CompName:Myrtenol; Bicyclo(3.1.1)hept-2-ene <2-methanol-, 6,6-dimethyl->

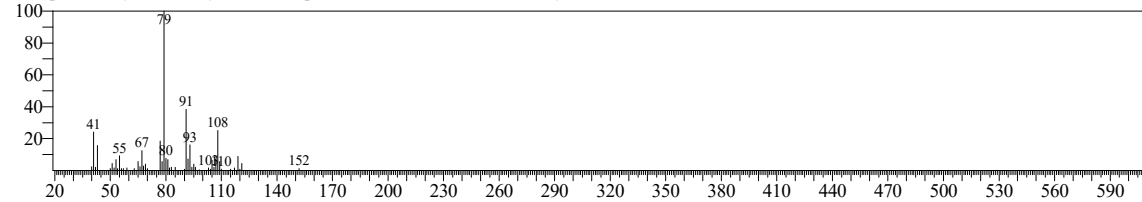



<< Target >>

Line#:17 R.Time:20.700(Scan#:3581) Retention Index:1200 MassPeaks:266

RawMode:Averaged 20.650-20.790(3571-3599) BasePeak:107.10(4386)

BG Mode:Calc. from Peak Group 1 - Event 1 Scan

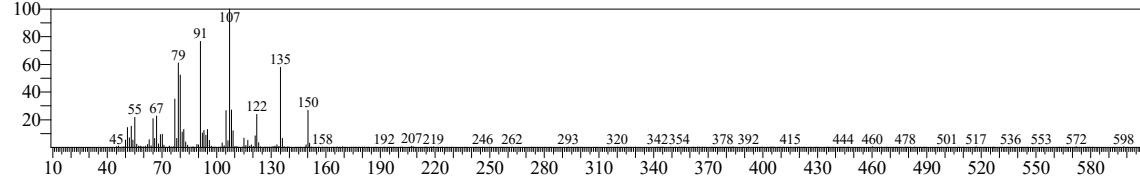

Hit#:1 Entry:820 Library:FFNSC 1.2.lib

SI:96 Formula:C10H14O CAS:80-57-9 MolWeight:150 RetIndex:1208

CompName:Verbenone; Bicyclo(3.1.1)hept-3-en-2-one <4,6,6-trimethyl->

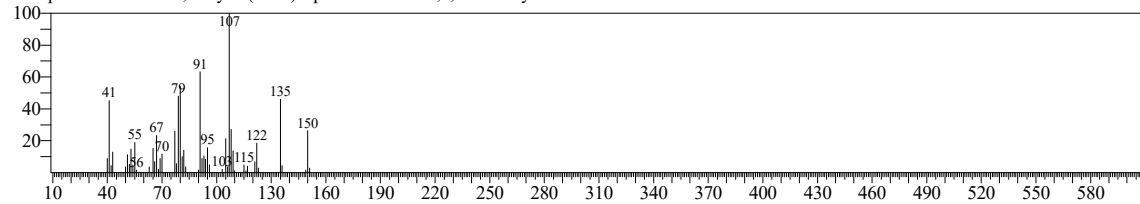

Hit#:2 Entry:27355 Library:NIST17.lib

SI:95 Formula:C10H14O CAS:1196-01-6 MolWeight:150 RetIndex:1119

CompName:Bicyclo[3.1.1]hept-3-en-2-one, 4,6,6-trimethyl-, (1S)-

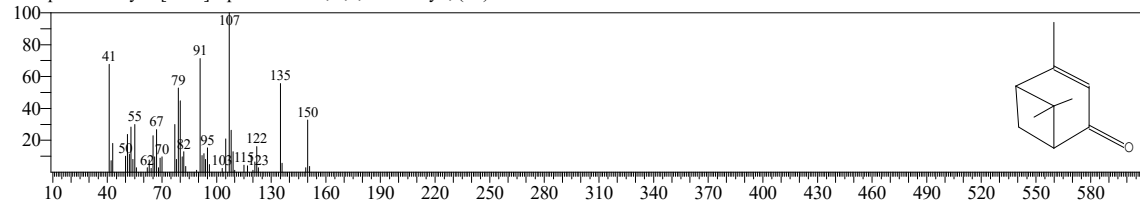

Hit#:3 Entry:62506 Library:W11N17MAIN1.lib

SI:95 Formula:C10H14O CAS:1196-01-6 MolWeight:150 RetIndex:1119

CompName:Bicyclo[3.1.1]hept-3-en-2-one, 4,6,6-trimethyl-, (1S)-

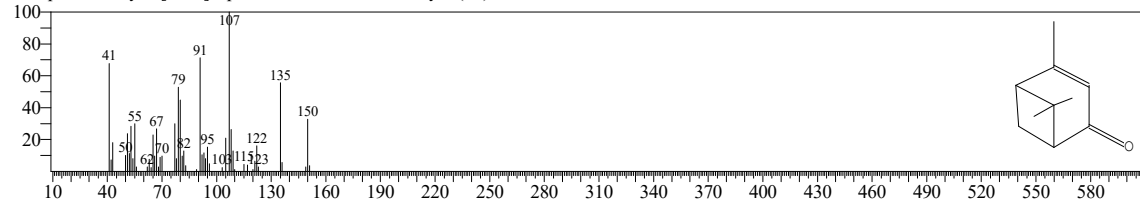

Hit#:4 Entry:62503 Library:W11N17MAIN1.lib

SI:94 Formula:C10H14O CAS:1196-01-6 MolWeight:150 RetIndex:1119

CompName:Bicyclo[3.1.1]hept-3-en-2-one, 4,6,6-trimethyl-, (1S)-

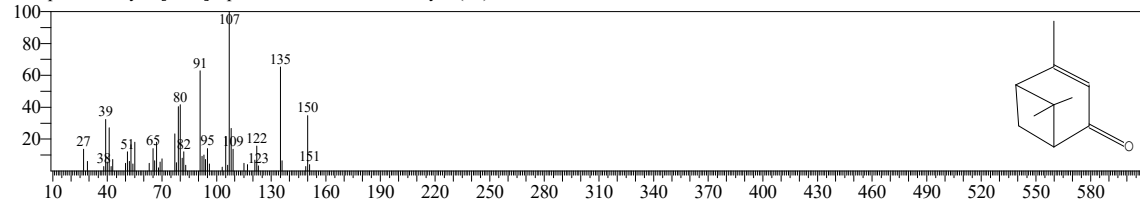

<< Target >>

Line#:17 R.Time:20.700(Scan#:3581) Retention Index:1200 MassPeaks:266

RawMode:Averaged 20.650-20.790(3571-3599) BasePeak:107.10(4386)

BG Mode:Calc. from Peak Group 1 - Event 1 Scan

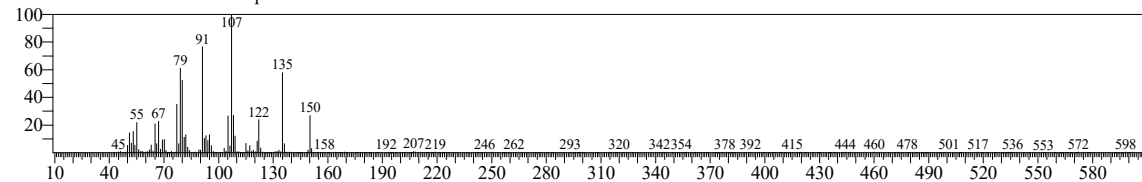

Hit#:5 Entry:62508 Library:W11N17MAIN1.lib

SI:94 Formula:C10H14O CAS:1196-01-6 MolWeight:150 RetIndex:1119

CompName:2-Pinen-4-one

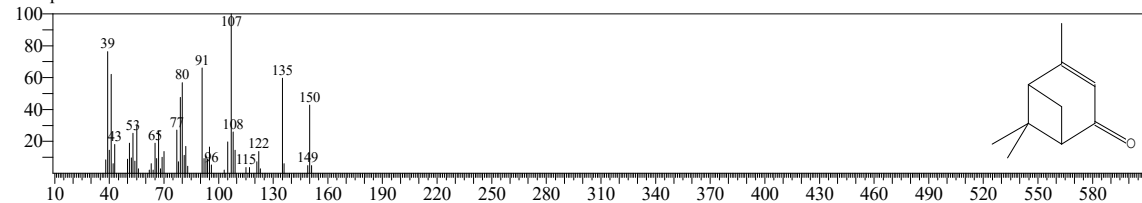

Hit#:6 Entry:27217 Library:NIST17.lib

SI:94 Formula:C10H14O CAS:1196-01-6 MolWeight:150 RetIndex:1119

CompName:Bicyclo[3.1.1]hept-3-en-2-one, 4,6,6-trimethyl-, (1S)-

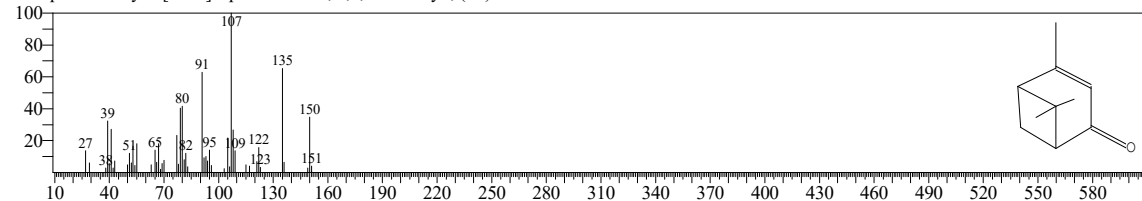

Hit#:7 Entry:27361 Library:NIST17.lib

SI:93 Formula:C10H14O CAS:473-06-3 MolWeight:150 RetIndex:1119

CompName:Bicyclo[3.1.1]hept-2-en-6-one, 2,7,7-trimethyl-

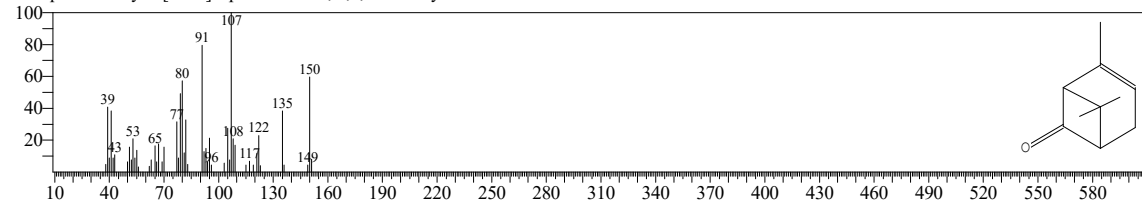

Hit#:8 Entry:62628 Library:W11N17MAIN1.lib

SI:93 Formula:C10H14O CAS:473-06-3 MolWeight:150 RetIndex:1119

CompName:Bicyclo[3.1.1]hept-2-en-6-one, 2,7,7-trimethyl-

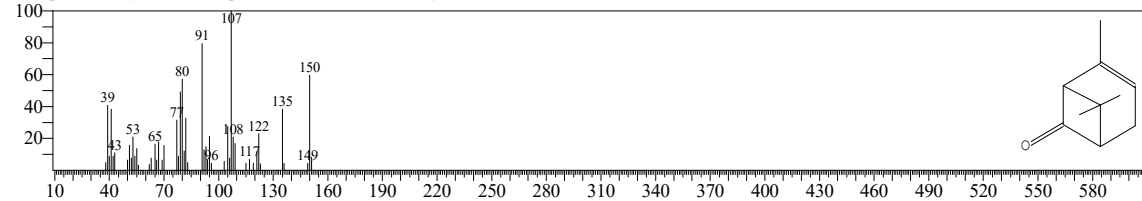

<< Target >>

Line#:17 R.Time:20.700(Scan#:3581) Retention Index:1200 MassPeaks:266

RawMode:Averaged 20.650-20.790(3571-3599) BasePeak:107.10(4386)

BG Mode:Calc. from Peak Group 1 - Event 1 Scan

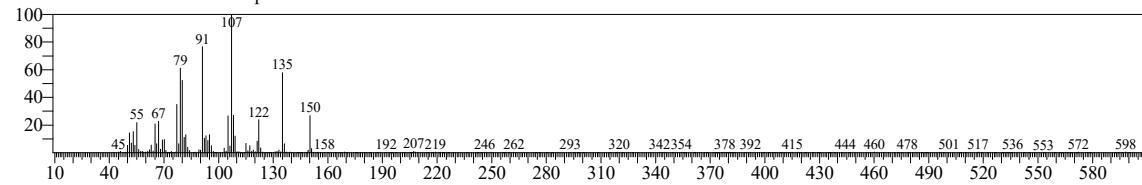

Hit#:9 Entry:27362 Library:NIST17.lib

SI:93 Formula:C10H14O CAS:80-57-9 MolWeight:150 RetIndex:1119

CompName:Bicyclo[3.1.1]hept-3-en-2-one, 4,6,6-trimethyl-

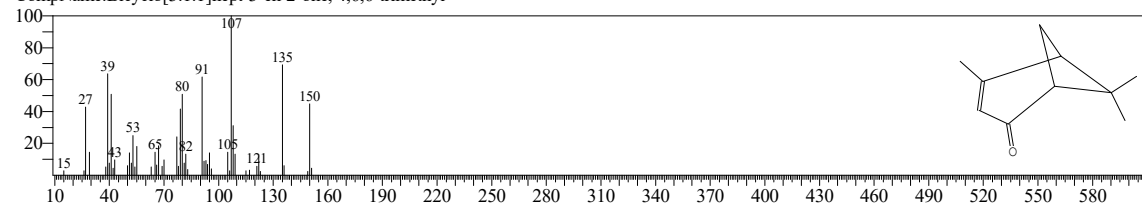

Hit#:10 Entry:62499 Library:W11N17MAIN1.lib

SI:93 Formula:C10H14O CAS:80-57-9 MolWeight:150 RetIndex:1119

CompName:Bicyclo[3.1.1]hept-3-en-2-one, 4,6,6-trimethyl-

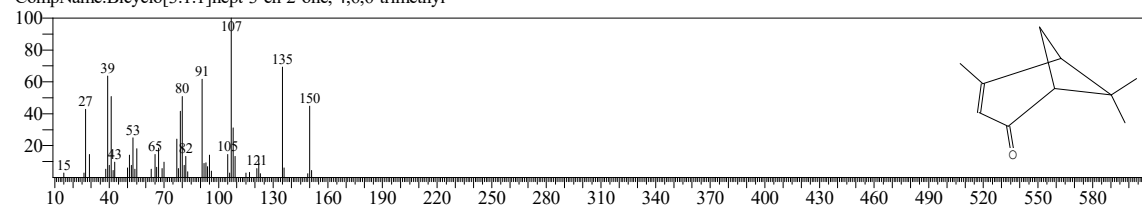

<< Target >>

Line#:18 R.Time:28.580(Scan#:5157) Retention Index:1377 MassPeaks:259

RawMode:Averaged 28.520-28.655(5145-5172) BasePeak:81.10(1817)

BG Mode:Calc. from Peak Group 1 - Event 1 Scan

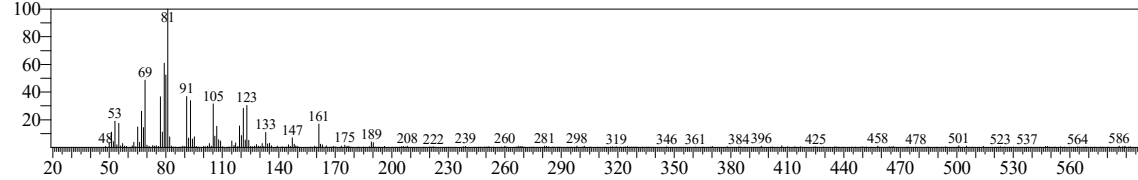

Hit#:1 Entry:203815 Library:W11N17MAIN1.lib

SI:87 Formula:C15H24 CAS:0-00-0 MolWeight:204 RetIndex:1407

CompName:Bicyclo[5.2.0]nonane, 4-methylene-2,8,8-trimethyl-2-vinyl-

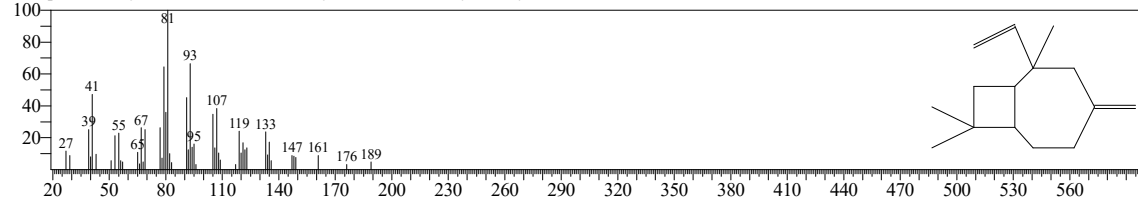

Hit#:2 Entry:75007 Library:NIST17.lib

SI:87 Formula:C15H24 CAS:0-00-0 MolWeight:204 RetIndex:1407

CompName:Bicyclo[5.2.0]nonane, 4-methylene-2,8,8-trimethyl-2-vinyl-

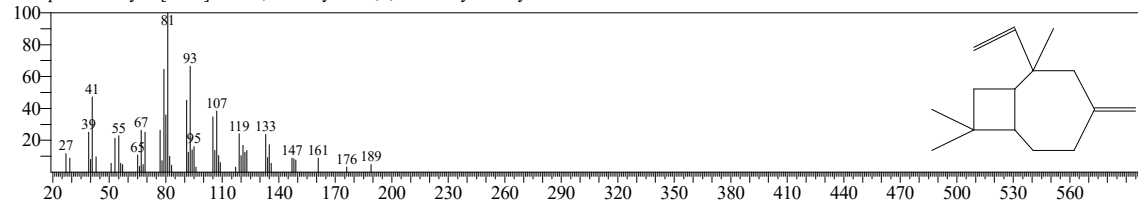

Hit#:3 Entry:965 Library:FFNSC 1.2.lib

SI:84 Formula:C15H24 CAS:33380-83-9 MolWeight:204 RetIndex:1390

CompName:Elemene <beta->; Cyclohexane <1-ethenyl-, 1-methyl-, 2,4-bis(1-methylethenyl)->

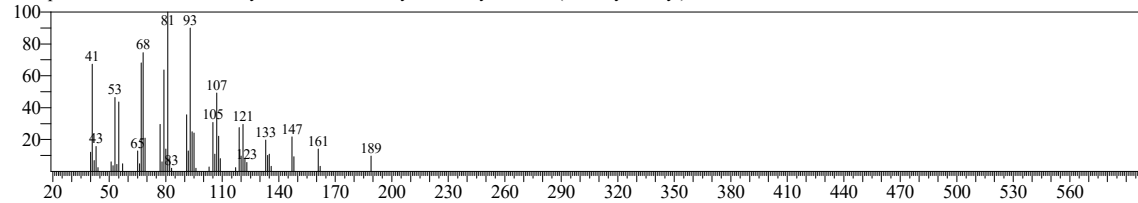

Hit#:4 Entry:204612 Library:W11N17MAIN1.lib

SI:83 Formula:C15H24 CAS:0-00-0 MolWeight:204 RetIndex:1407

CompName:Bicyclo[4.3.0]nonane, 7-methylene-2,4,4-trimethyl-2-vinyl-

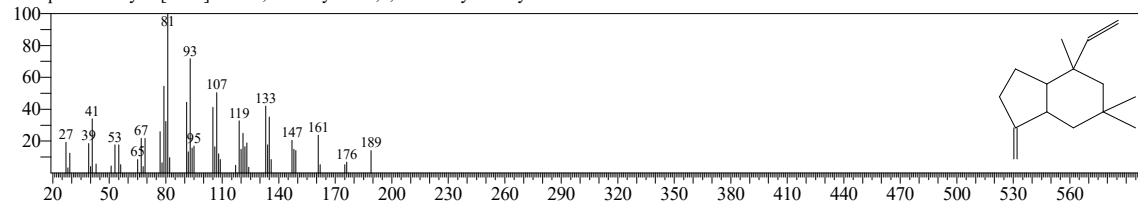

<< Target >>

Line#:18 R.Time:28.580(Scan#:5157) Retention Index:1377 MassPeaks:259

RawMode:Averaged 28.520-28.655(5145-5172) BasePeak:81.10(1817)

BG Mode:Calc. from Peak Group 1 - Event 1 Scan

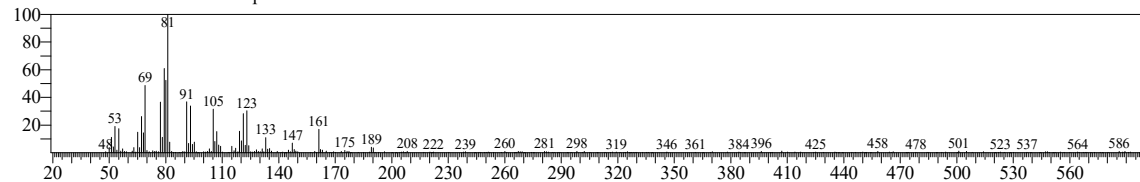

Hit#:5 Entry:75006 Library:NIST17.lib

SI:83 Formula:C15H24 CAS:0-00-0 MolWeight:204 RetIndex:1407

CompName:Bicyclo[4.3.0]nonane, 7-methylene-2,4,4-trimethyl-2-vinyl-

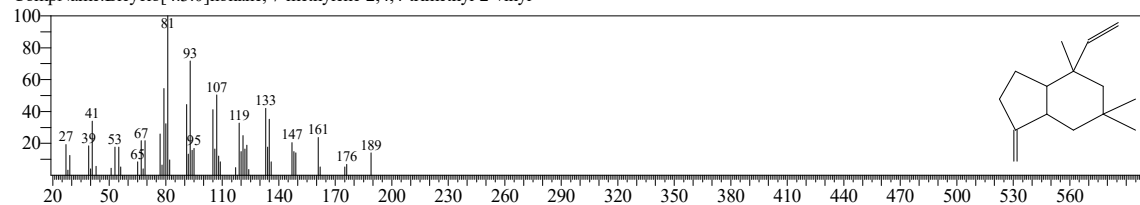

Hit#:6 Entry:204613 Library:W11N17MAIN1.lib

SI:83 Formula:C15H24 CAS:0-00-0 MolWeight:204 RetIndex:1407

CompName:Bicyclo[4.3.0]nonane, 7-methylene-2,4,4-trimethyl-2-vinyl-

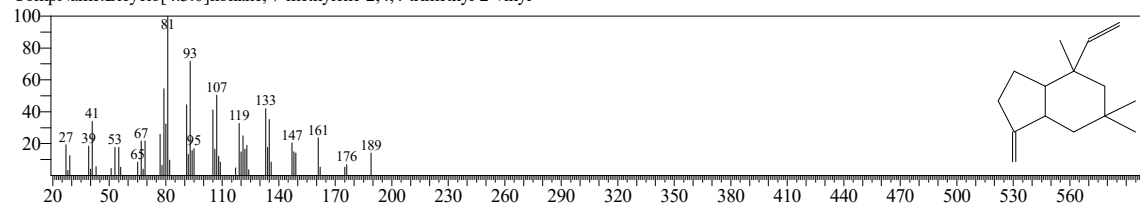

Hit#:7 Entry:203842 Library:W11N17MAIN1.lib

SI:83 Formula:C15H24 CAS:502-61-4 MolWeight:204 RetIndex:1458

CompName:.alpha.-Farnesene

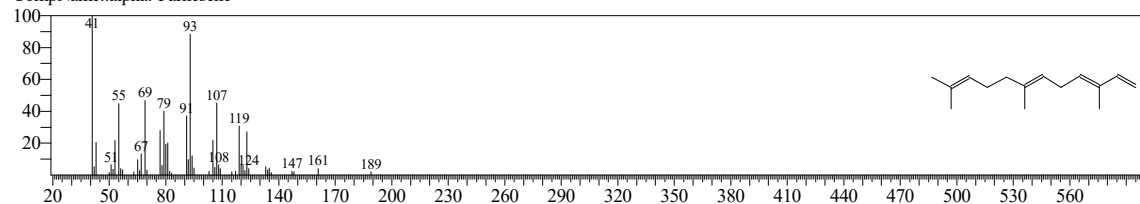

Hit#:8 Entry:75241 Library:NIST17.lib

SI:83 Formula:C15H24 CAS:502-61-4 MolWeight:204 RetIndex:1458

CompName:.alpha.-Farnesene

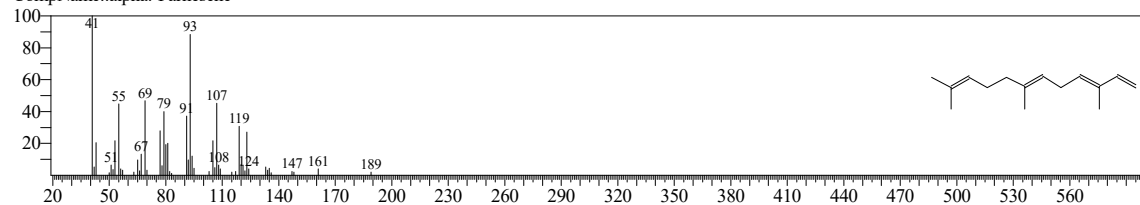

<< Target >>

Line#:18 R.Time:28.580(Scan#:5157) Retention Index:1377 MassPeaks:259

RawMode:Averaged 28.520-28.655(5145-5172) BasePeak:81.10(1817)

BG Mode:Calc. from Peak Group 1 - Event 1 Scan

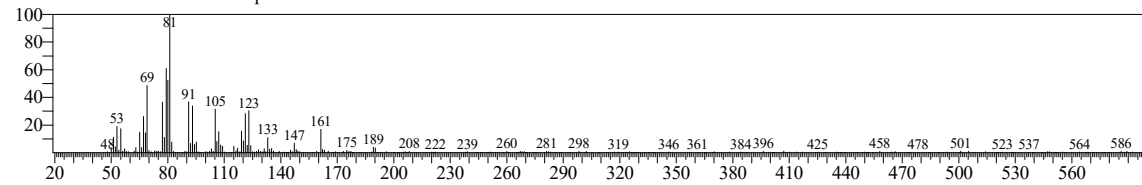

Hit#:9 Entry:75001 Library:NIST17.lib

SI:83 Formula:C15H24 CAS:110823-68-2 MolWeight:204 RetIndex:1398

CompName:Cyclohexane, 1-ethenyl-1-methyl-2,4-bis(1-methylethenyl)-

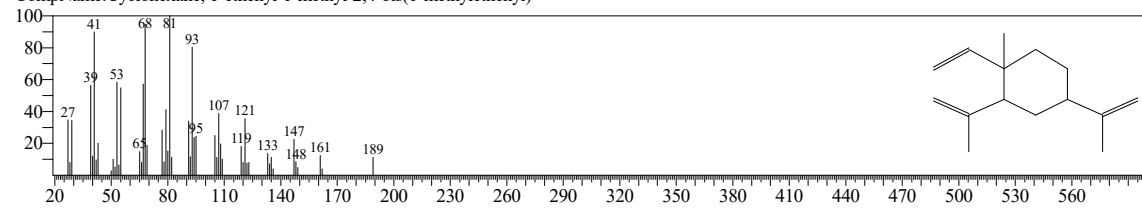

Hit#:10 Entry:204299 Library:W11N17MAIN1.lib

SI:83 Formula:C15H24 CAS:110823-68-2 MolWeight:204 RetIndex:1398

CompName:Cyclohexane, 1-ethenyl-1-methyl-2,4-bis(1-methylethenyl)-

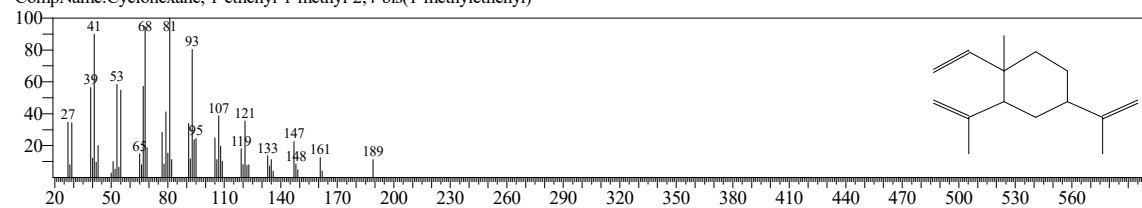

<< Target >>

Line#:19 R.Time:28.890(Scan#:5219) Retention Index:1385 MassPeaks:326

RawMode:Averaged 28.815-29.005(5204-5242) BasePeak:93.10(9804)

BG Mode:Calc. from Peak Group 1 - Event 1 Scan

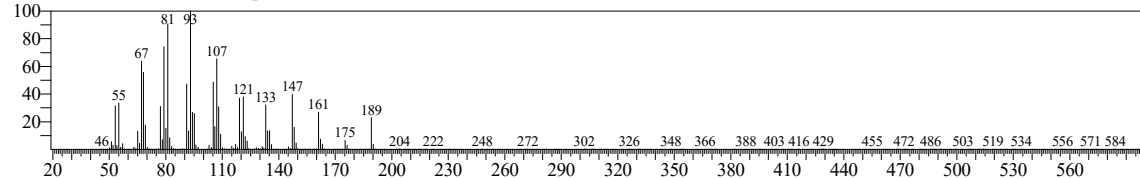

Hit#:1 Entry:204302 Library:W11N17MAIN1.lib

SI:97 Formula:C15H24 CAS:515-13-9 MolWeight:204 RetIndex:1398

CompName:1-Methyl-1-ethenyl-2,4-bis(1-methylethenyl)cyclohexane

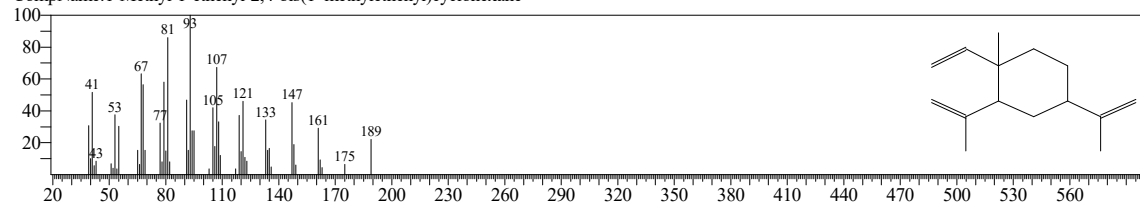

Hit#:2 Entry:204298 Library:W11N17MAIN1.lib

SI:95 Formula:C15H24 CAS:515-13-9 MolWeight:204 RetIndex:1398

CompName:Cyclohexane, 1-ethenyl-1-methyl-2,4-bis(1-methylethenyl)-, [1S-(1.alpha.,2.beta.,4.beta.)]-

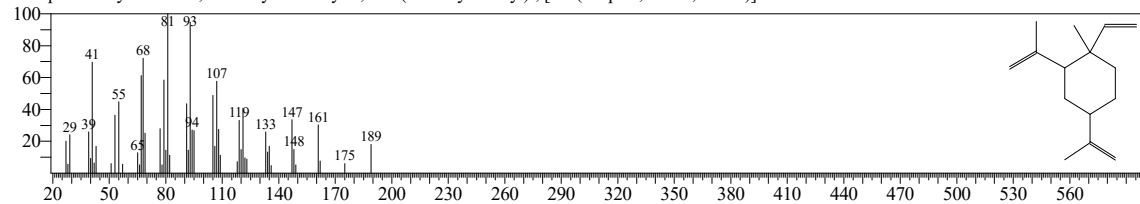

Hit#:3 Entry:75270 Library:NIST17.lib

SI:95 Formula:C15H24 CAS:515-13-9 MolWeight:204 RetIndex:1398

CompName:Cyclohexane, 1-ethenyl-1-methyl-2,4-bis(1-methylethenyl)-, [1S-(1.alpha.,2.beta.,4.beta.)]-

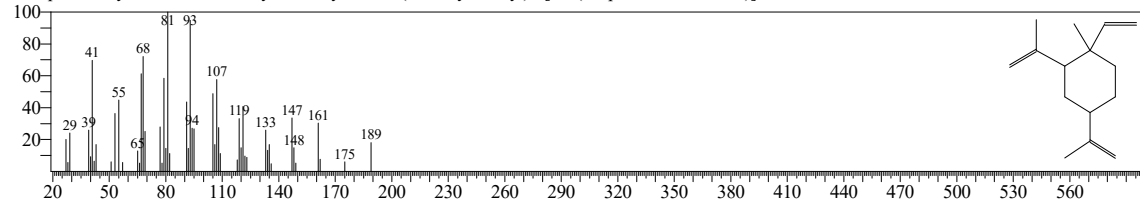

Hit#:4 Entry:204301 Library:W11N17MAIN1.lib

SI:93 Formula:C15H24 CAS:515-13-9 MolWeight:204 RetIndex:1398

CompName:Cyclohexane, 1-ethenyl-1-methyl-2,4-bis(1-methylethenyl)-, [1S-(1.alpha.,2.beta.,4.beta.)]-

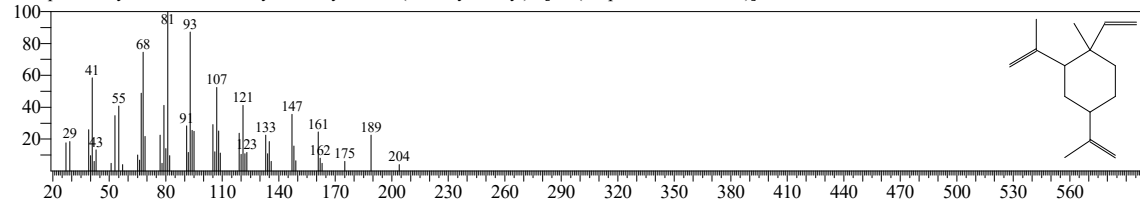

<< Target >>

Line#:19 R.Time:28.890(Scan#:5219) Retention Index:1385 MassPeaks:326

RawMode:Averaged 28.815-29.005(5204-5242) BasePeak:93.10(9804)

BG Mode:Calc. from Peak Group 1 - Event 1 Scan

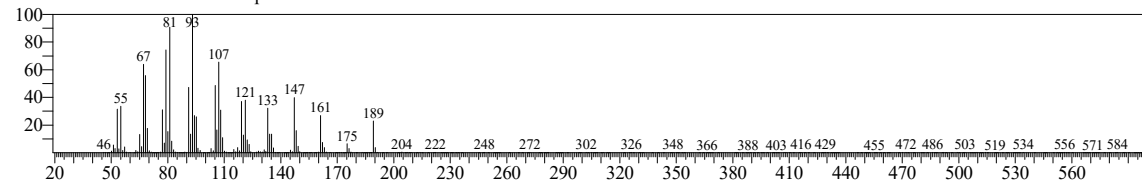

Hit#:5 Entry:204295 Library:W11N17MAIN1.lib

SI:93 Formula:C15H24 CAS:515-13-9 MolWeight:204 RetIndex:1398

CompName:1-Methyl-1-ethenyl-2,4-bis(1-methylethenyl)cyclohexane

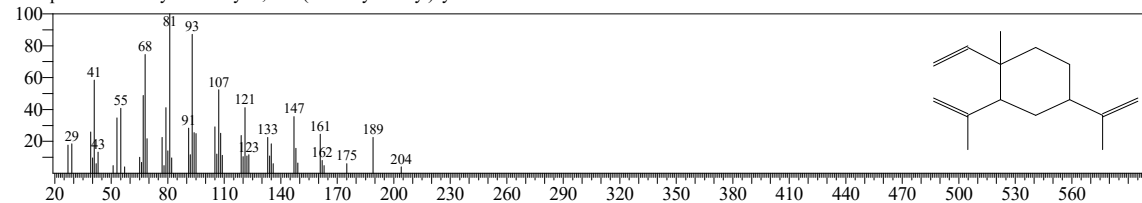

Hit#:6 Entry:75005 Library:NIST17.lib

SI:93 Formula:C15H24 CAS:515-13-9 MolWeight:204 RetIndex:1398

CompName:Cyclohexane, 1-ethenyl-1-methyl-2,4-bis(1-methylethenyl)-, [1S-(1.alpha.,2.beta.,4.beta.)]-

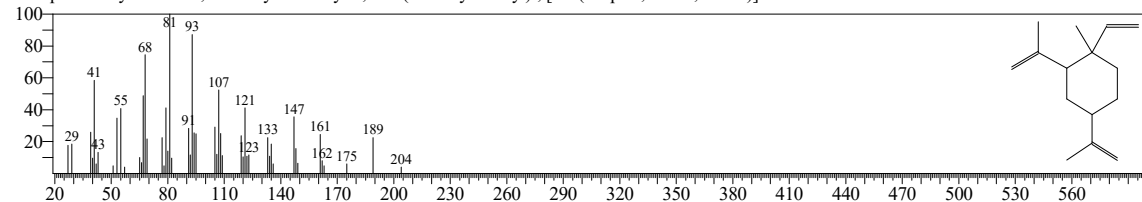

Hit#:7 Entry:965 Library:FFNSC 1.2.lib

SI:93 Formula:C15H24 CAS:33380-83-9 MolWeight:204 RetIndex:1390

CompName:Elemene <beta->; Cyclohexane <1-ethenyl-, 1-methyl-, 2,4-bis(1-methylethenyl)->

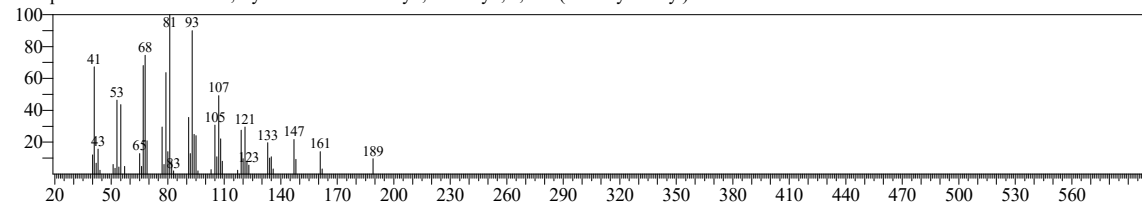

Hit#:8 Entry:204706 Library:W11N17MAIN1.lib

SI:92 Formula:C15H24 CAS:28387-44-2 MolWeight:204 RetIndex:1570

CompName:Germacra-3,9,11-triene, (E,E)-

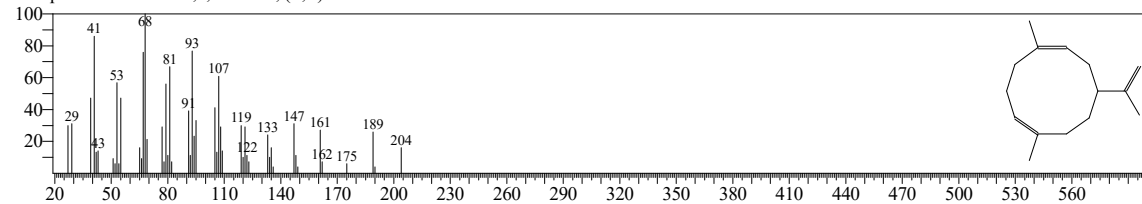



<< Target >>

Line#:19 R.Time:28.890(Scan#:5219) Retention Index:1385 MassPeaks:326

RawMode:Averaged 28.815-29.005(5204-5242) BasePeak:93.10(9804)

BG Mode:Calc. from Peak Group 1 - Event 1 Scan

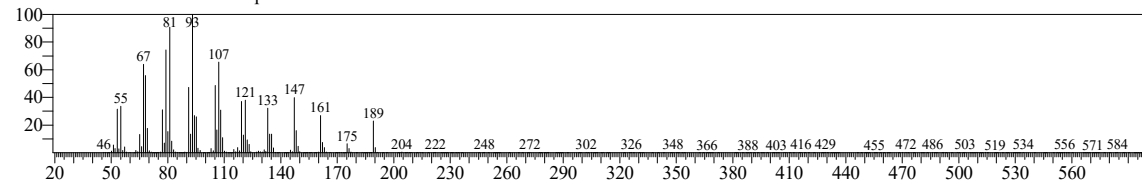

Hit#:9 Entry:204703 Library:W11N17MAIN1.lib

SI:90 Formula:C15H24 CAS:0-00-0 MolWeight:204 RetIndex:1570

CompName:8-Isopropenyl-1,5-dimethyl-cyclodeca-1,5-diene

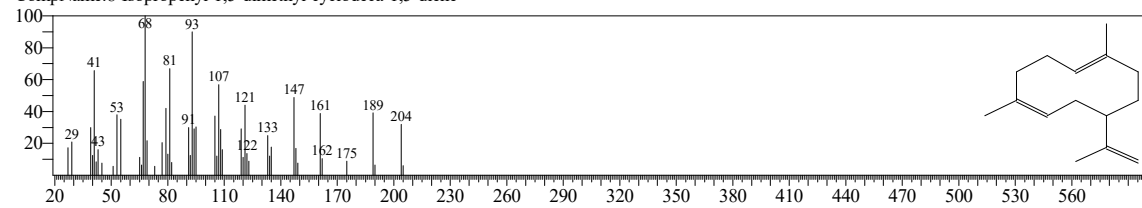

Hit#:10 Entry:74986 Library:NIST17.lib

SI:90 Formula:C15H24 CAS:0-00-0 MolWeight:204 RetIndex:1570

CompName:8-Isopropenyl-1,5-dimethyl-cyclodeca-1,5-diene

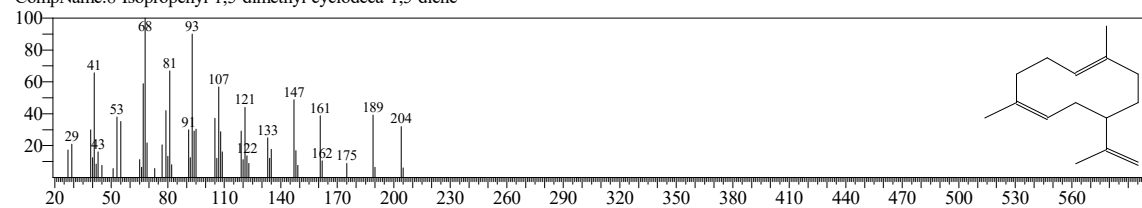

<< Target >>

Line#:20 R.Time:30.025(Scan#:5446) Retention Index:1411 MassPeaks:368

RawMode:Averaged 29.945-30.125(5430-5466) BasePeak:91.05(8608)

BG Mode:Calc. from Peak Group 1 - Event 1 Scan

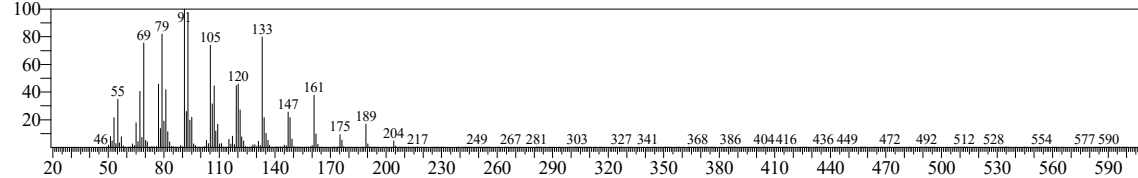

Hit#:1 Entry:204258 Library:W11N17MAIN1.lib

SI:96 Formula:C15H24 CAS:87-44-5 MolWeight:204 RetIndex:1494

CompName:Caryophyllene

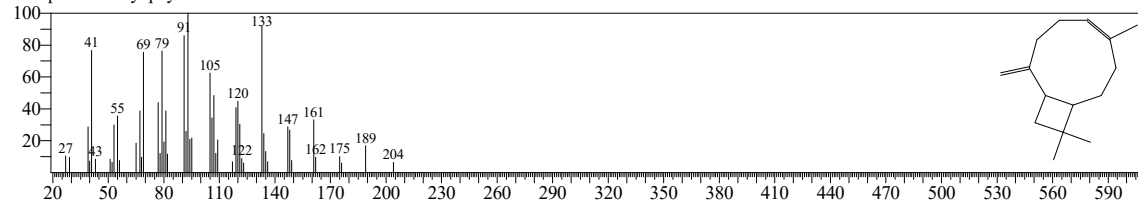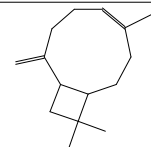

Hit#:2 Entry:75037 Library:NIST17.lib

SI:96 Formula:C15H24 CAS:87-44-5 MolWeight:204 RetIndex:1494

CompName:Caryophyllene

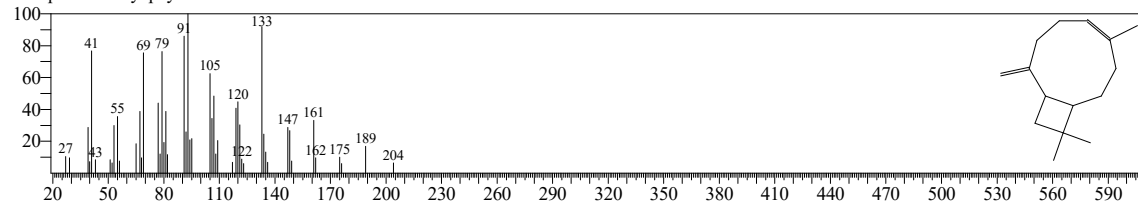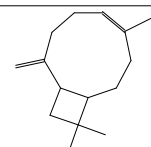

Hit#:3 Entry:75287 Library:NIST17.lib

SI:94 Formula:C15H24 CAS:87-44-5 MolWeight:204 RetIndex:1494

CompName:Caryophyllene

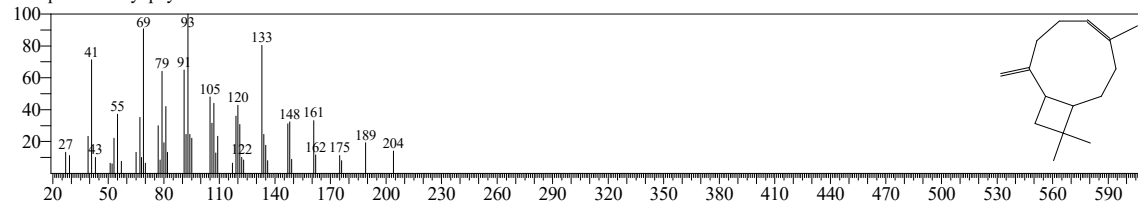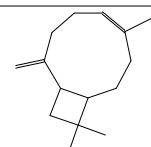

Hit#:4 Entry:204263 Library:W11N17MAIN1.lib

SI:94 Formula:C15H24 CAS:87-44-5 MolWeight:204 RetIndex:1494

CompName:Caryophyllene

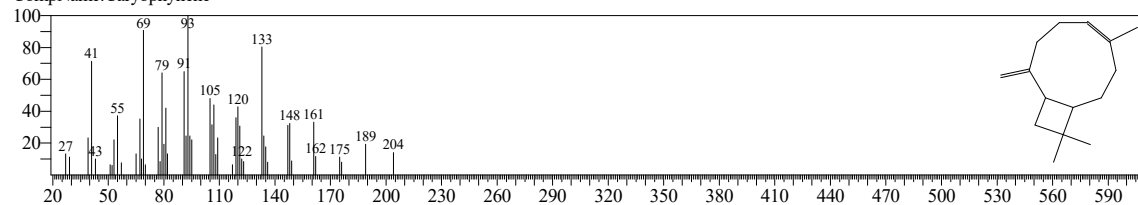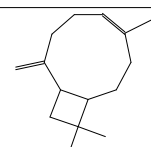

<< Target >>

Line#:20 R.Time:30.025(Scan#:5446) Retention Index:1411 MassPeaks:368

RawMode:Averaged 29.945-30.125(5430-5466) BasePeak:91.05(8608)

BG Mode:Calc. from Peak Group 1 - Event 1 Scan

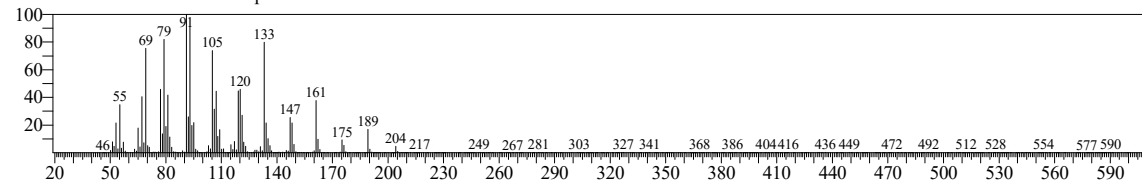

Hit#:5 Entry:75297 Library:NIST17.lib

SI:94 Formula:C15H24 CAS:118-65-0 MolWeight:204 RetIndex:1494

CompName:Bicyclo[7.2.0]undec-4-ene, 4,11,11-trimethyl-8-methylene-[1R-(1R\*,4Z,9S\*)]-

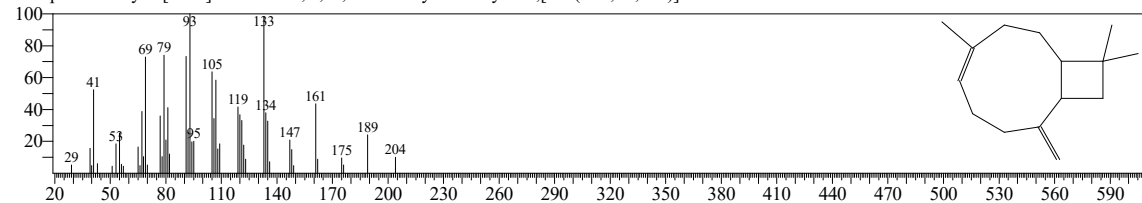

Hit#:6 Entry:204265 Library:W11N17MAIN1.lib

SI:94 Formula:C15H24 CAS:118-65-0 MolWeight:204 RetIndex:1494

CompName:Bicyclo[7.2.0]undec-4-ene, 4,11,11-trimethyl-8-methylene-[1R-(1R\*,4Z,9S\*)]-

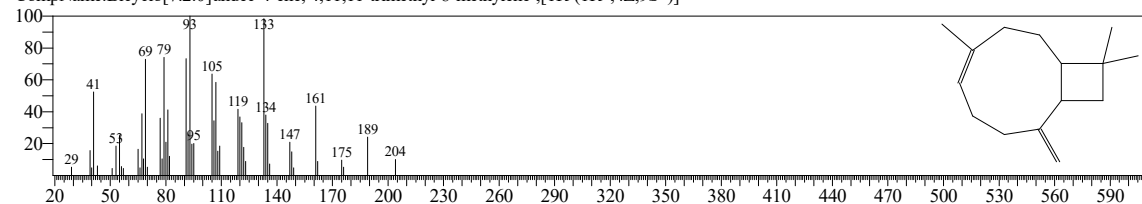

Hit#:7 Entry:204260 Library:W11N17MAIN1.lib

SI:94 Formula:C15H24 CAS:87-44-5 MolWeight:204 RetIndex:1494

CompName:Caryophyllene

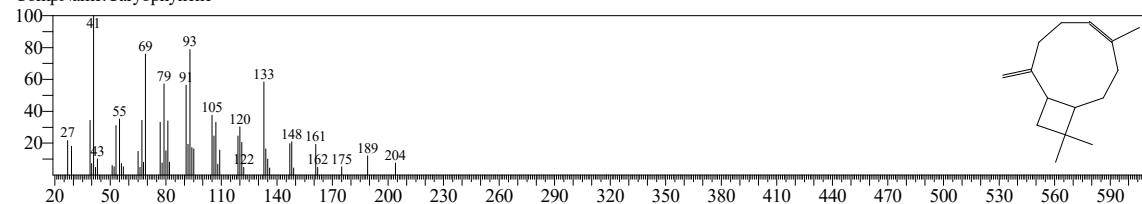

Hit#:8 Entry:75243 Library:NIST17.lib

SI:94 Formula:C15H24 CAS:87-44-5 MolWeight:204 RetIndex:1494

CompName:Caryophyllene

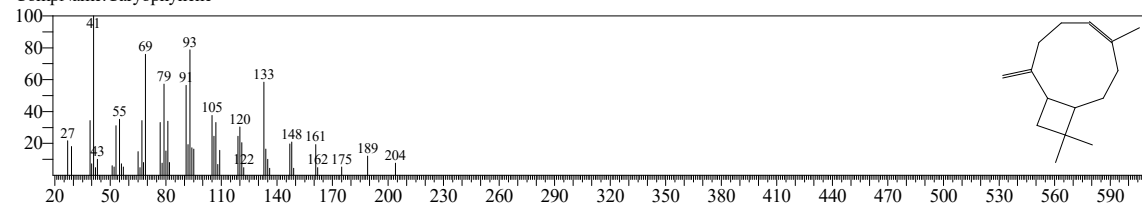

<< Target >>

Line#:20 R.Time:30.025(Scan#:5446) Retention Index:1411 MassPeaks:368

RawMode:Averaged 29.945-30.125(5430-5466) BasePeak:91.05(8608)

BG Mode:Calc. from Peak Group 1 - Event 1 Scan

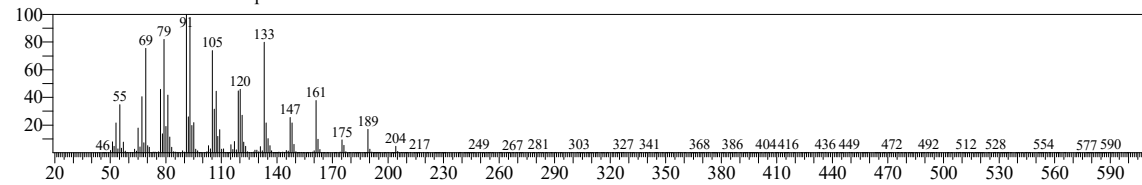

Hit#:9 Entry:204248 Library:W11N17MAIN1.lib

SI:93 Formula:C15H24 CAS:0-00-0 MolWeight:204 RetIndex:1494

CompName:(1R,4Z,9S)-4,11,11-trimethyl-8-methylene-bicyclo[7.2.0]undec-4-ene

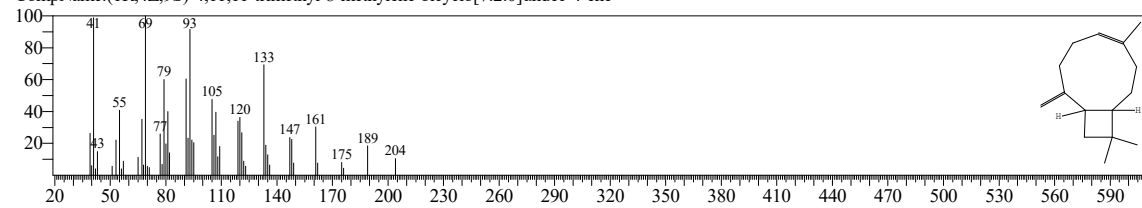

Hit#:10 Entry:204254 Library:W11N17MAIN1.lib

SI:93 Formula:C15H24 CAS:87-44-5 MolWeight:204 RetIndex:1494

CompName:Isocaryophyllene

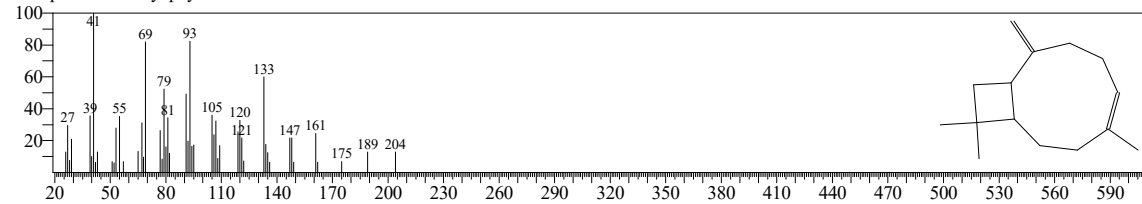

<< Target >>

Line#:21 R.Time:31.440(Scan#:5729) Retention Index:1445 MassPeaks:360

RawMode:Averaged 31.360-31.530(5713-5747) BasePeak:93.10(18766)

BG Mode:Calc. from Peak Group 1 - Event 1 Scan

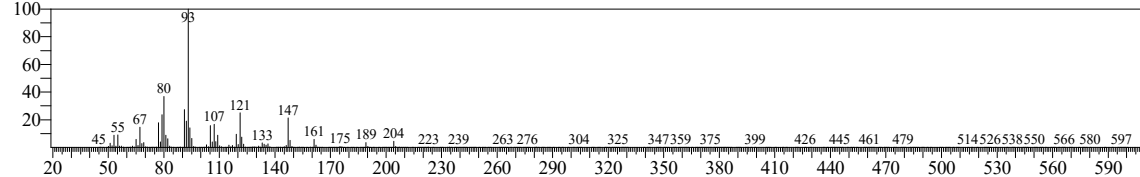

Hit#:1 Entry:203899 Library:W11N17MAIN1.lib

SI:96 Formula:C15H24 CAS:6753-98-6 MolWeight:204 RetIndex:1579

CompName:alpha.-Humulene

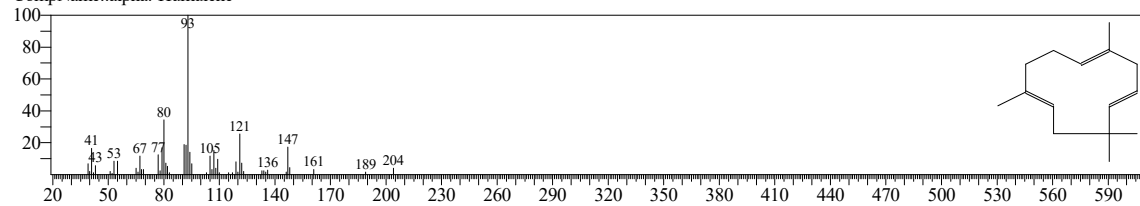

Hit#:2 Entry:1092 Library:FFNSC 1.2.lib

SI:96 Formula:C15 H24 CAS:6753-98-6 MolWeight:204 RetIndex:1454

CompName:Humulene <alpha->; Cycloundeca-1(E),4(E),8(E)-triene <2,6,6,9-tetramethyl->

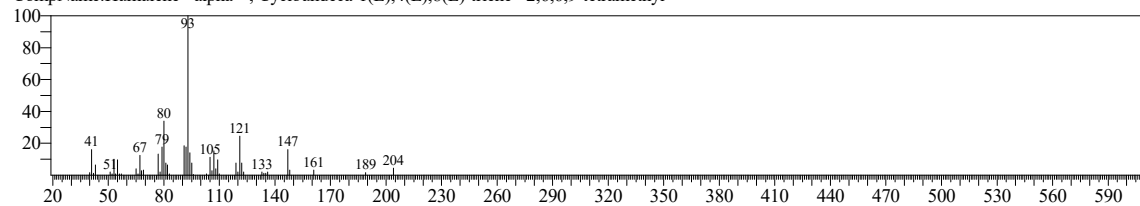

Hit#:3 Entry:203896 Library:W11N17MAIN1.lib

SI:95 Formula:C15H24 CAS:6753-98-6 MolWeight:204 RetIndex:1579

CompName:Humulene

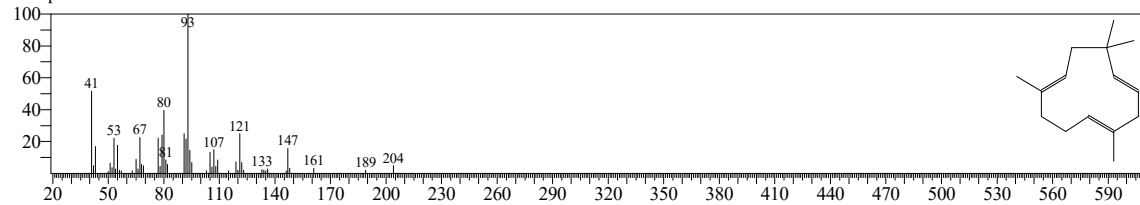

Hit#:4 Entry:75281 Library:NIST17.lib

SI:95 Formula:C15H24 CAS:6753-98-6 MolWeight:204 RetIndex:1579

CompName:Humulene

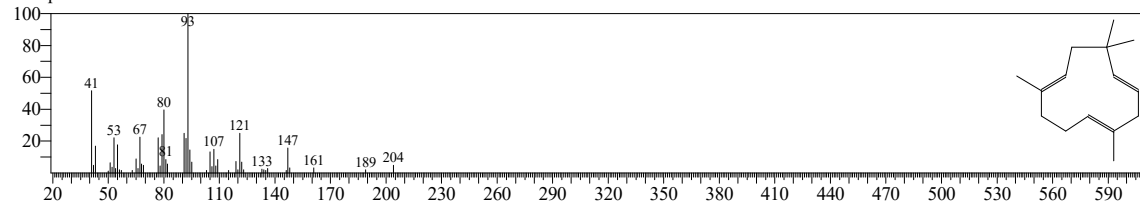

<< Target >>

Line#:21 R.Time:31.440(Scan#:5729) Retention Index:1445 MassPeaks:360

RawMode:Averaged 31.360-31.530(5713-5747) BasePeak:93.10(18766)

BG Mode:Calc. from Peak Group 1 - Event 1 Scan

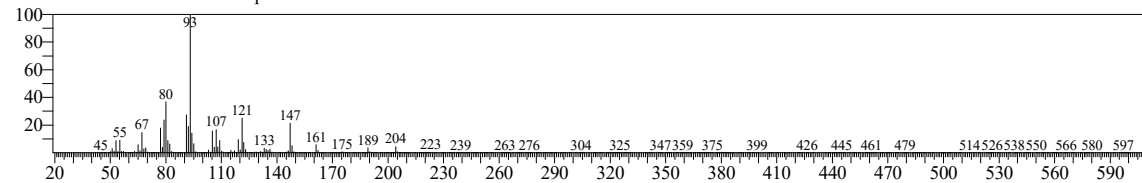

Hit#:5 Entry:75288 Library:NIST17.lib

SI:93 Formula:C15H24 CAS:6753-98-6 MolWeight:204 RetIndex:1579

CompName:Humulene

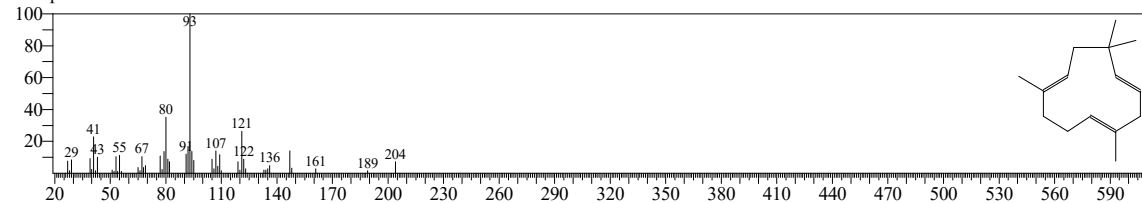

Hit#:6 Entry:203895 Library:W11N17MAIN1.lib

SI:93 Formula:C15H24 CAS:6753-98-6 MolWeight:204 RetIndex:1579

CompName:Humulene

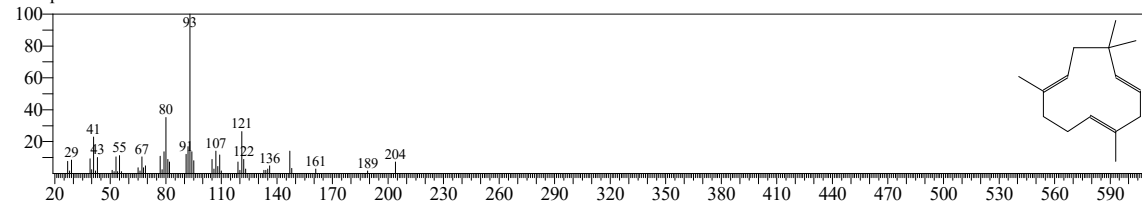

Hit#:7 Entry:75027 Library:NIST17.lib

SI:93 Formula:C15H24 CAS:0-00-0 MolWeight:204 RetIndex:1579

CompName:1,4,7,-Cycloundecatriene, 1,5,9,9-tetramethyl-, Z,Z,Z-

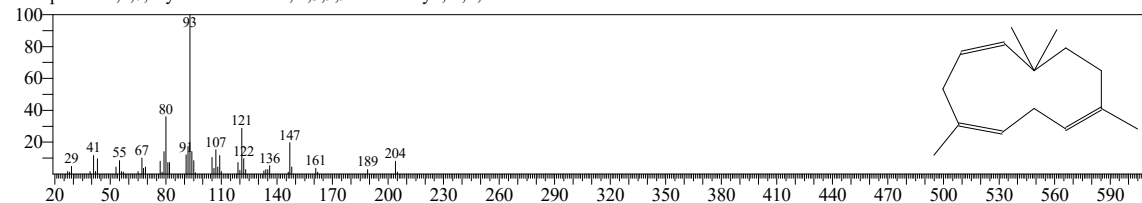

Hit#:8 Entry:203939 Library:W11N17MAIN1.lib

SI:93 Formula:C15H24 CAS:0-00-0 MolWeight:204 RetIndex:1579

CompName:1,4,7,-Cycloundecatriene, 1,5,9,9-tetramethyl-, Z,Z,Z-

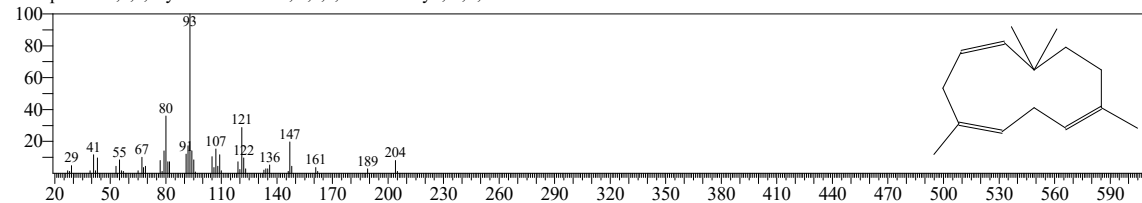

<< Target >>

Line#:21 R.Time:31.440(Scan#:5729) Retention Index:1445 MassPeaks:360

RawMode:Averaged 31.360-31.530(5713-5747) BasePeak:93.10(18766)

BG Mode:Calc. from Peak Group 1 - Event 1 Scan

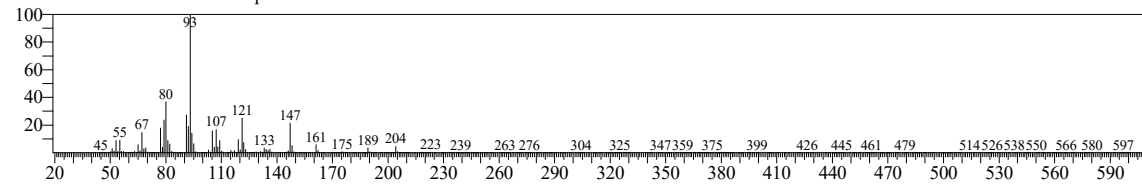

Hit#:9 Entry:203894 Library:W11N17MAIN1.lib

SI:92 Formula:C15H24 CAS:6753-98-6 MolWeight:204 RetIndex:1579

CompName:Humulene

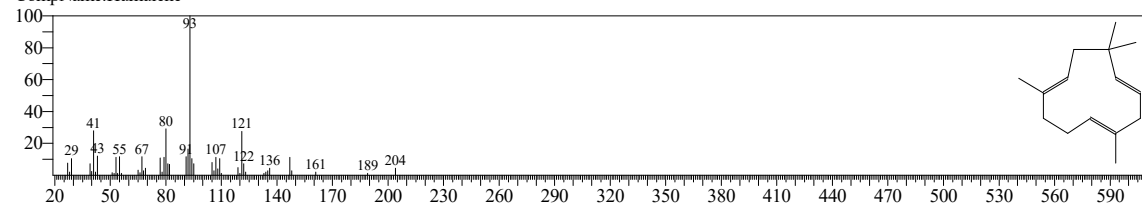

Hit#:10 Entry:75025 Library:NIST17.lib

SI:92 Formula:C15H24 CAS:6753-98-6 MolWeight:204 RetIndex:1579

CompName:Humulene

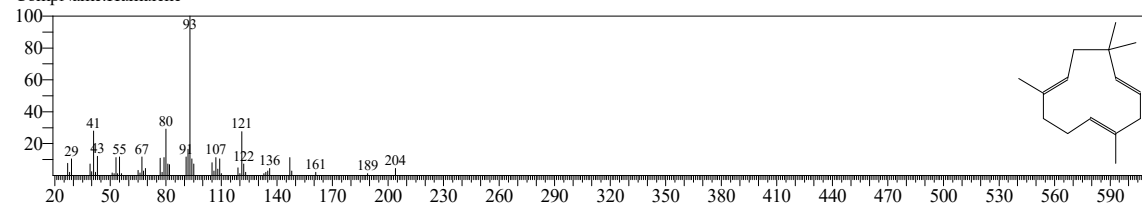

<< Target >>

Line#:22 R.Time:32.110(Scan#:5863) Retention Index:1461 MassPeaks:291

RawMode:Averaged 32.055-32.180(5852-5877) BasePeak:105.10(2224)

BG Mode:Calc. from Peak Group 1 - Event 1 Scan

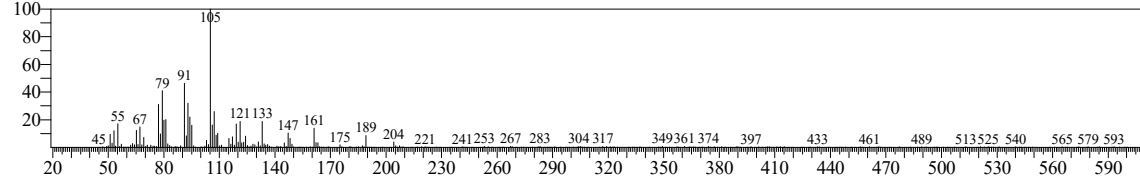

Hit#:1 Entry:75310 Library:NIST17.lib

SI:94 Formula:C15H24 CAS:54868-40-5 MolWeight:204 RetIndex:1474

CompName:(4S,4aR,6R)-4,4a-Dimethyl-6-(prop-1-en-2-yl)-1,2,3,4,4a,5,6,7-octahydronaphthalene

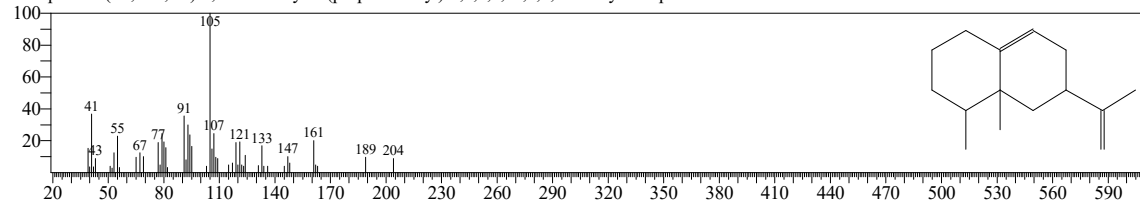

Hit#:2 Entry:204791 Library:W11N17MAIN1.lib

SI:94 Formula:C15H24 CAS:54868-40-5 MolWeight:204 RetIndex:1474

CompName:(4S,4aR,6R)-4,4a-Dimethyl-6-(prop-1-en-2-yl)-1,2,3,4,4a,5,6,7-octahydronaphthalene

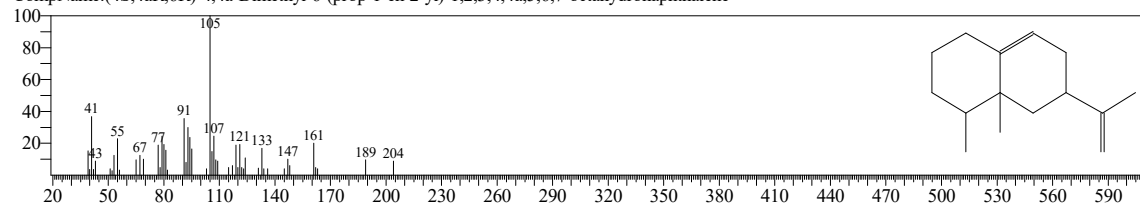

Hit#:3 Entry:204788 Library:W11N17MAIN1.lib

SI:90 Formula:C15H24 CAS:823810-22-6 MolWeight:204 RetIndex:1474

CompName:(4R,4aS,6S)-4,4a-Dimethyl-6-(prop-1-en-2-yl)-1,2,3,4,4a,5,6,7-octahydronaphthalene

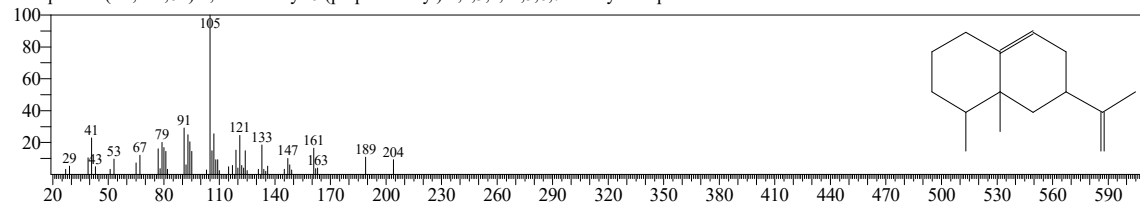

Hit#:4 Entry:75050 Library:NIST17.lib

SI:90 Formula:C15H24 CAS:823810-22-6 MolWeight:204 RetIndex:1474

CompName:(4R,4aS,6S)-4,4a-Dimethyl-6-(prop-1-en-2-yl)-1,2,3,4,4a,5,6,7-octahydronaphthalene

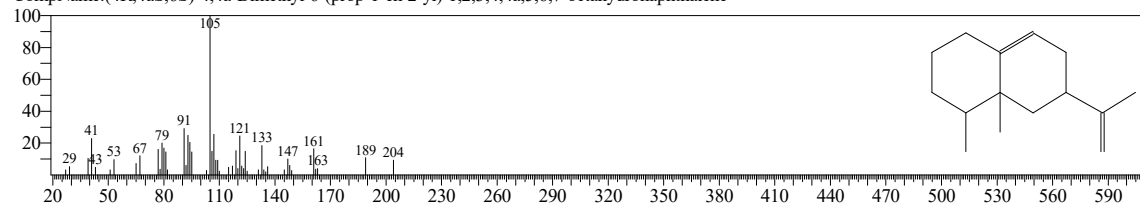



<< Target >>

Line#:22 R.Time:32.110(Scan#:5863) Retention Index:1461 MassPeaks:291

RawMode:Averaged 32.055-32.180(5852-5877) BasePeak:105.10(2224)

BG Mode:Calc. from Peak Group 1 - Event 1 Base

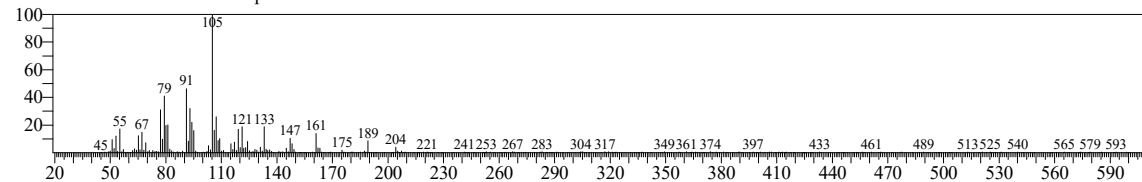

Hit#:5 Entry:75057 Library:NIST17.lib

SI:89 Formula:C15H24 CAS:54868-40-5 MolWeight:204 RetIndex:1474

CompName:(4S,4aR,6R)-4,4a-Dimethyl-6-(prop-1-en-2-yl)-1,2,3,4,4a,5,6,7-octahydronaphthalene

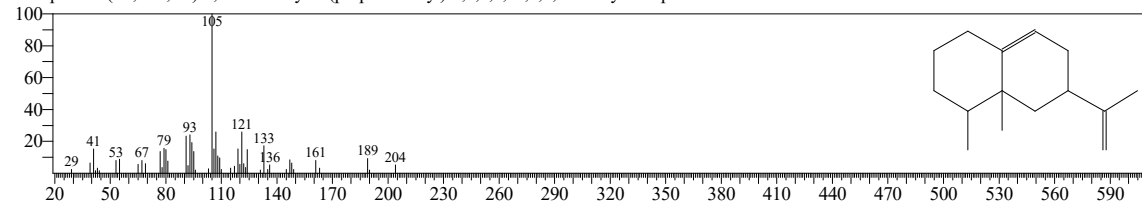

Hit#:6 Entry:204790 Library:W11N17MAIN1.lib

SI:89 Formula:C15H24 CAS:54868-40-5 MolWeight:204 RetIndex:1474

CompName:(4S,4aR,6R)-4,4a-Dimethyl-6-(prop-1-en-2-yl)-1,2,3,4,4a,5,6,7-octahydronaphthalene

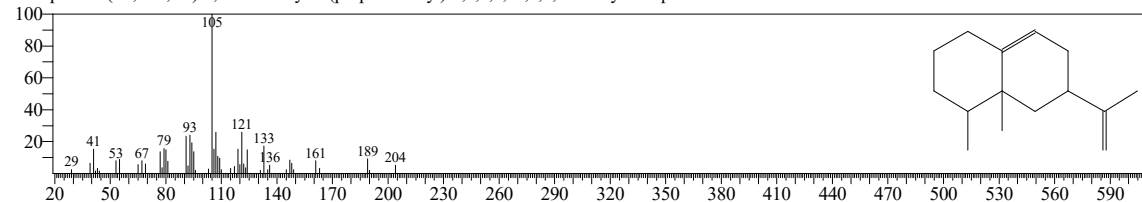

Hit#:7 Entry:204789 Library:W11N17MAIN1.lib

SI:88 Formula:C15H24 CAS:26620-71-3 MolWeight:204 RetIndex:1474

CompName:Aristolochene

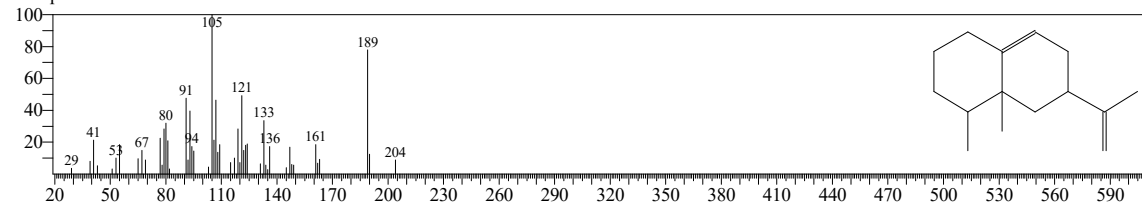

Hit#:8 Entry:75068 Library:NIST17.lib

SI:88 Formula:C15H24 CAS:26620-71-3 MolWeight:204 RetIndex:1474

CompName:Aristolochene

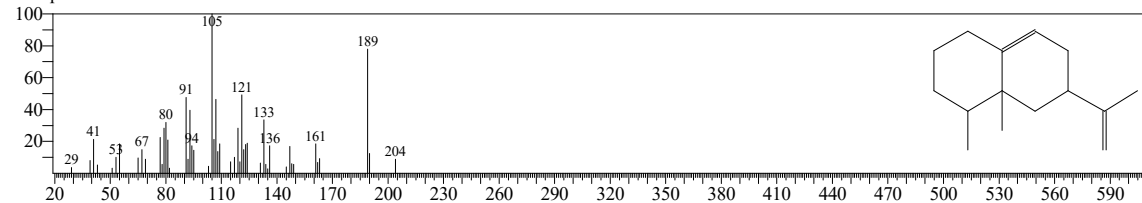

<< Target >>

Line#:22 R.Time:32.110(Scan#:5863) Retention Index:1461 MassPeaks:291

RawMode:Averaged 32.055-32.180(5852-5877) BasePeak:105.10(2224)

BG Mode:Calc. from Peak Group 1 - Event 1 Scan

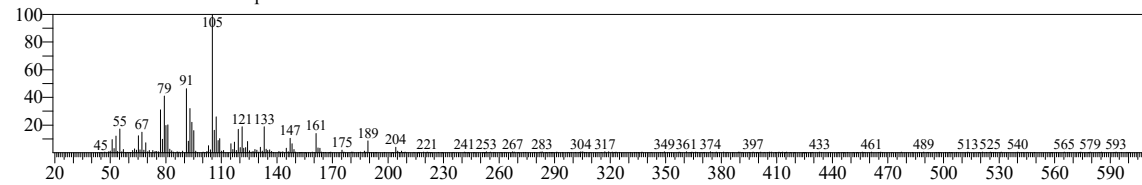

Hit#:9 Entry:204395 Library:W11N17MAIN1.lib

SI:87 Formula:C15H24 CAS:31983-22-9 MolWeight:204 RetIndex:1440

CompName:alpha.-Muurolene

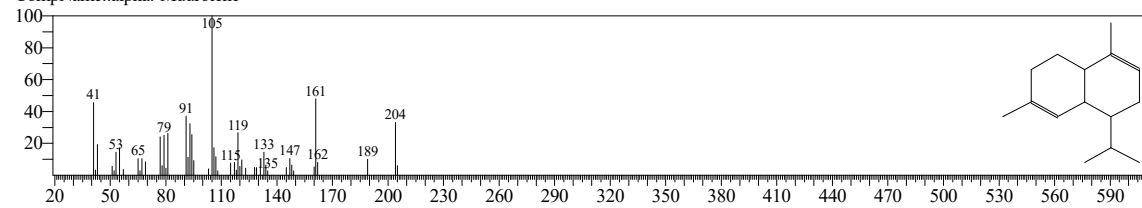

Hit#:10 Entry:75323 Library:NIST17.lib

SI:87 Formula:C15H24 CAS:31983-22-9 MolWeight:204 RetIndex:1440

CompName:alpha.-Muurolene

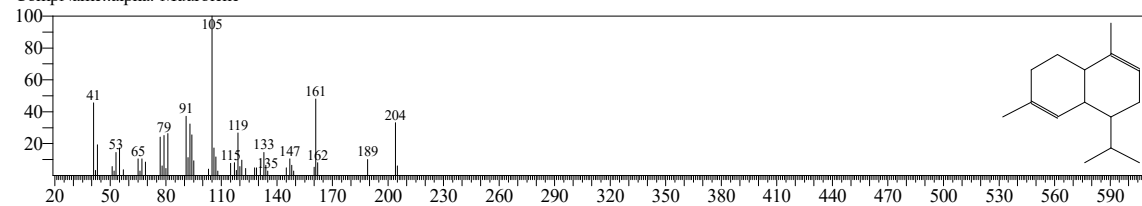

<< Target >>

Line#:23 R.Time:32.395(Scan#:5920) Retention Index:1468 MassPeaks:299

RawMode:Averaged 32.310-32.485(5903-5938) BasePeak:105.10(2091)

BG Mode:Calc. from Peak Group 1 - Event 1 Scan

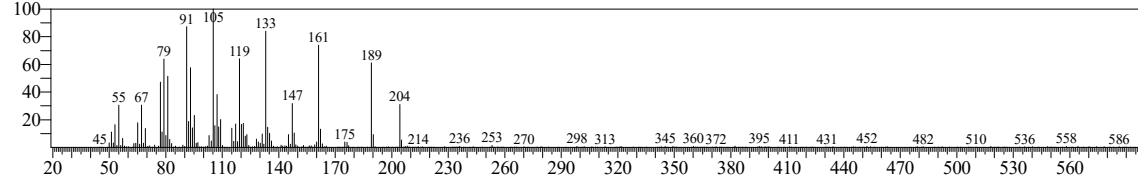

Hit#:1 Entry:75330 Library:NIST17.lib

SI:91 Formula:C15H24 CAS:88-84-6 MolWeight:204 RetIndex:1523

CompName:.beta.-Guaiene

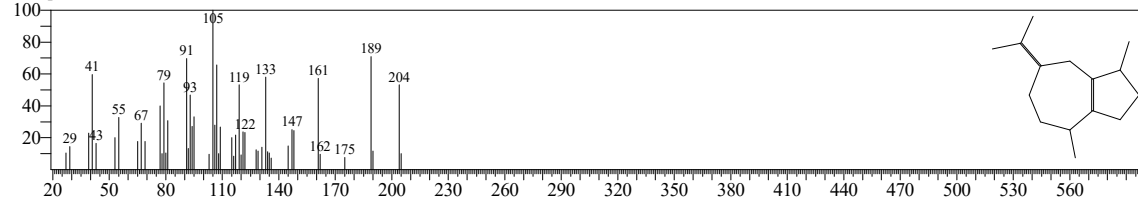

Hit#:2 Entry:203951 Library:W11N17MAIN1.lib

SI:91 Formula:C15H24 CAS:88-84-6 MolWeight:204 RetIndex:1523

CompName:.beta.-Guaiene

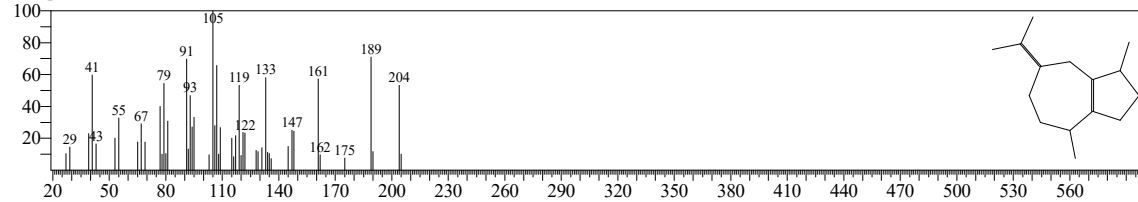

Hit#:3 Entry:204268 Library:W11N17MAIN1.lib

SI:90 Formula:C15H24 CAS:0-00-0 MolWeight:204 RetIndex:1339

CompName:(-)-Sinularene

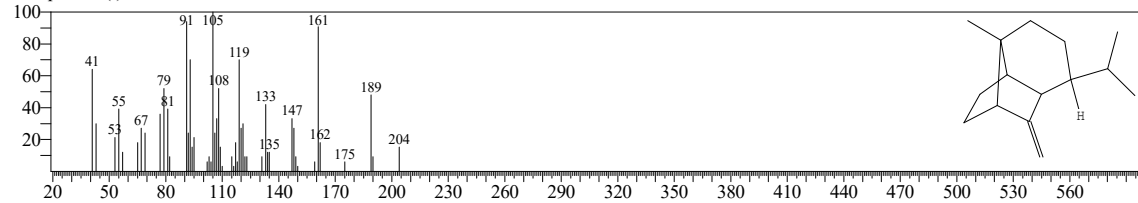

Hit#:4 Entry:75292 Library:NIST17.lib

SI:90 Formula:C15H24 CAS:3691-11-0 MolWeight:204 RetIndex:1490

CompName:Azulene, 1,2,3,5,6,7,8,8a-octahydro-1,4-dimethyl-7-(1-methylethenyl)-, [1S-(1.alpha.,7.alpha.,8a.beta.)]-

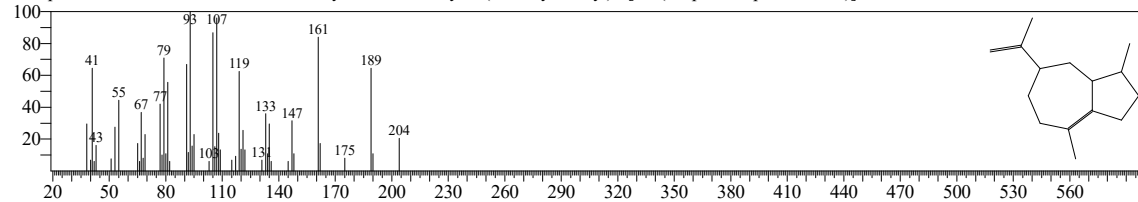

<< Target >>

Line#:23 R.Time:32.395(Scan#:5920) Retention Index:1468 MassPeaks:299

RawMode:Averaged 32.310-32.485(5903-5938) BasePeak:105.10(2091)

BG Mode:Calc. from Peak Group 1 - Event 1 Scan

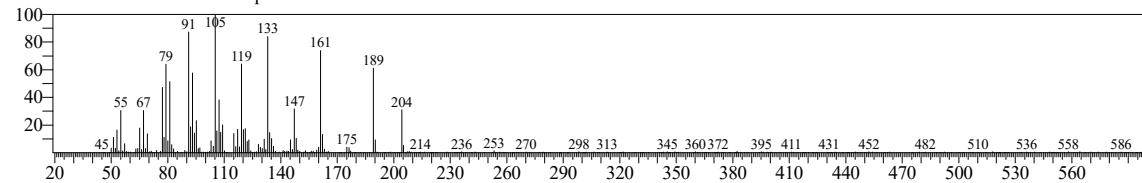

Hit#:5 Entry:204472 Library:W11N17MAIN1.lib

SI:90 Formula:C15H24 CAS:489-40-7 MolWeight:204 RetIndex:1419

CompName:1H-Cycloprop[e]azulene, 1a,2,3,4,4a,5,6,7b-octahydro-1,1,4,7-tetramethyl-, [1aR-(1a.alpha.,4.alpha.,4a.beta.,7b.alpha.)]-

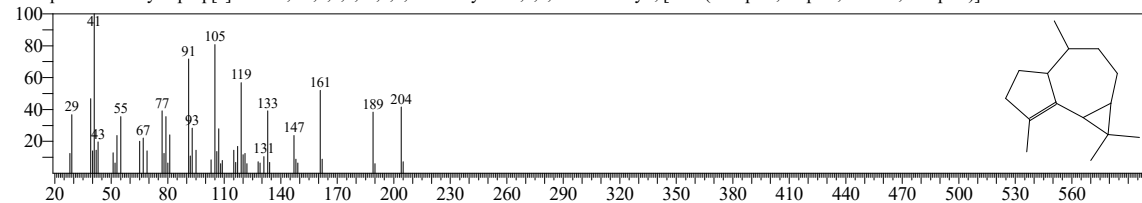

Hit#:6 Entry:75248 Library:NIST17.lib

SI:90 Formula:C15H24 CAS:489-40-7 MolWeight:204 RetIndex:1419

CompName:1H-Cycloprop[e]azulene, 1a,2,3,4,4a,5,6,7b-octahydro-1,1,4,7-tetramethyl-, [1aR-(1a.alpha.,4.alpha.,4a.beta.,7b.alpha.)]-

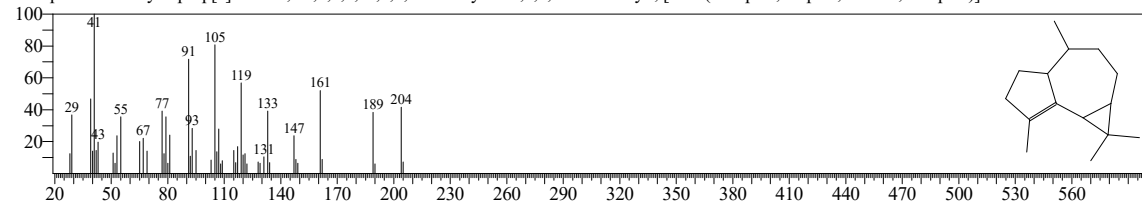

Hit#:7 Entry:204746 Library:W11N17MAIN1.lib

SI:90 Formula:C15H24 CAS:3691-11-0 MolWeight:204 RetIndex:1490

CompName:Azulene, 1,2,3,5,6,7,8,8a-octahydro-1,4-dimethyl-7-(1-methylethenyl)-, [1S-(1.alpha.,7.alpha.,8a.beta.)]-

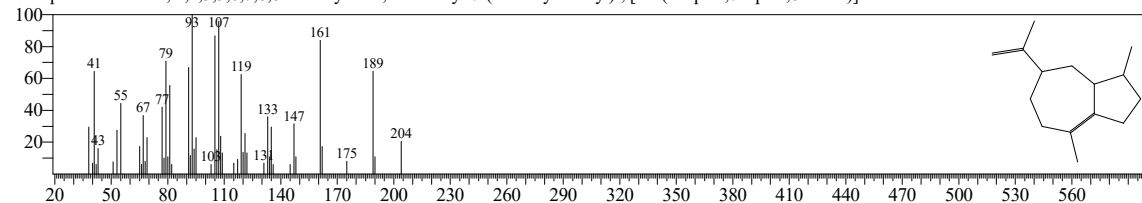

Hit#:8 Entry:204471 Library:W11N17MAIN1.lib

SI:90 Formula:C15H24 CAS:489-40-7 MolWeight:204 RetIndex:1419

CompName:1H-Cycloprop[e]azulene, 1a,2,3,4,4a,5,6,7b-octahydro-1,1,4,7-tetramethyl-, [1aR-(1a.alpha.,4.alpha.,4a.beta.,7b.alpha.)]-

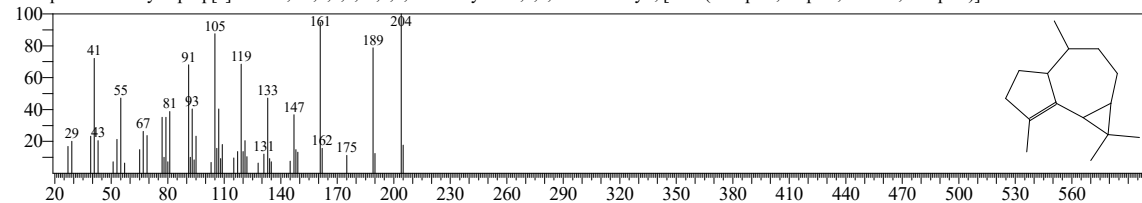

<< Target >>

Line#:23 R.Time:32.395(Scan#:5920) Retention Index:1468 MassPeaks:299

RawMode:Averaged 32.310-32.485(5903-5938) BasePeak:105.10(2091)

BG Mode:Calc. from Peak Group 1 - Event 1 Scan

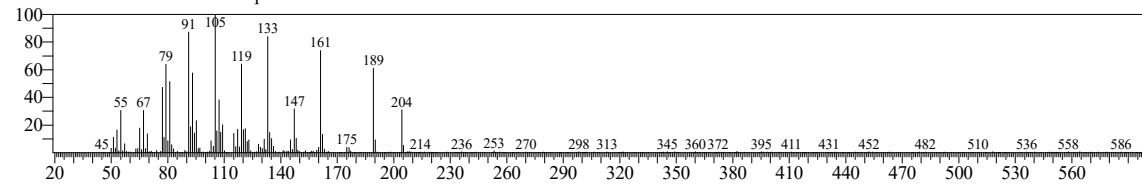

Hit#:9 Entry:75226 Library:NIST17.lib

SI:90 Formula:C15H24 CAS:489-40-7 MolWeight:204 RetIndex:1419

CompName:1H-Cycloprop[e]azulene, 1a,2,3,4,4a,5,6,7b-octahydro-1,1,4,7-tetramethyl-, [1aR-(1a.alpha.,4.alpha.,4a.beta.,7b.alpha.)]-

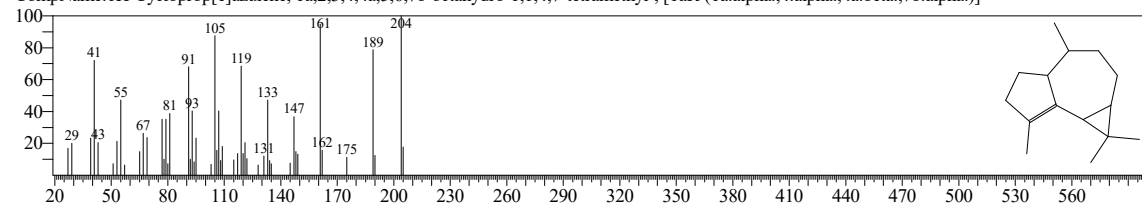

Hit#:10 Entry:75181 Library:NIST17.lib

SI:90 Formula:C15H24 CAS:58893-88-2 MolWeight:204 RetIndex:1502

CompName:(4aR,8aS)-4a-Methyl-1-methylene-7-(propan-2-ylidene)decahydronaphthalene

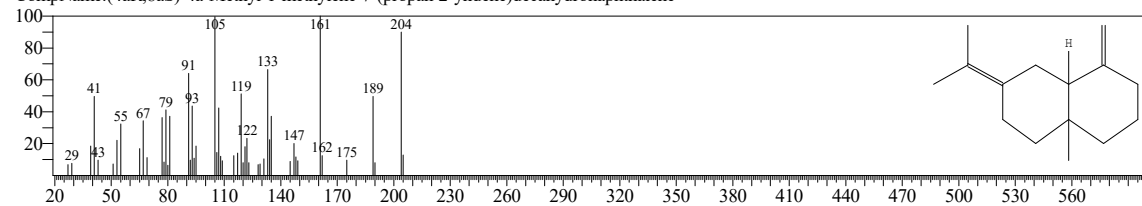

<< Target >>

Line#:24 R.Time:32.595(Scan#:5960) Retention Index:1473 MassPeaks:337

RawMode:Averaged 32.485-32.735(5938-5988) BasePeak:161.15(152941)

BG Mode:Calc. from Peak Group 1 - Event 1 Scan

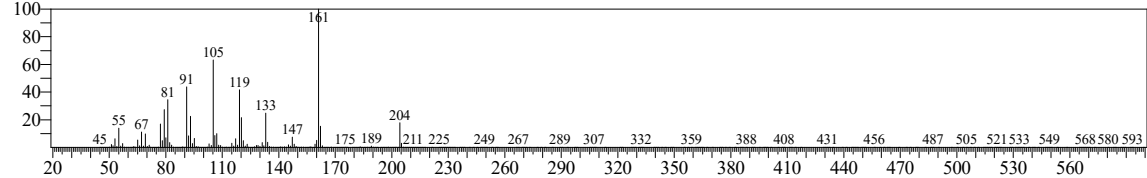

Hit#:1 Entry:203946 Library:W11N17MAIN1.lib

SI:96 Formula:C15H24 CAS:23986-74-5 MolWeight:204 RetIndex:1515

CompName:(-)-Germacrene D

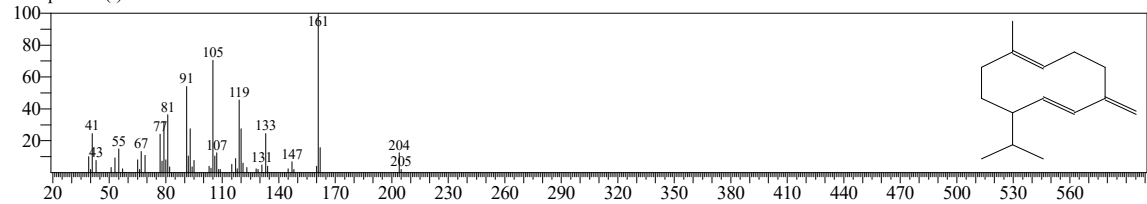

Hit#:2 Entry:1093 Library:FFNSC 1.2.lib

SI:93 Formula:C15H24 CAS:39029-41-9 MolWeight:204 RetIndex:1512

CompName:Cadinene <gamma->, Naphthalene <1,2,3,4,4a,5,6,8a-octahydro-, 7-methyl-, 4-methylene-, 1-(1-methylethyl)-, (1R,4aS,8aS)->

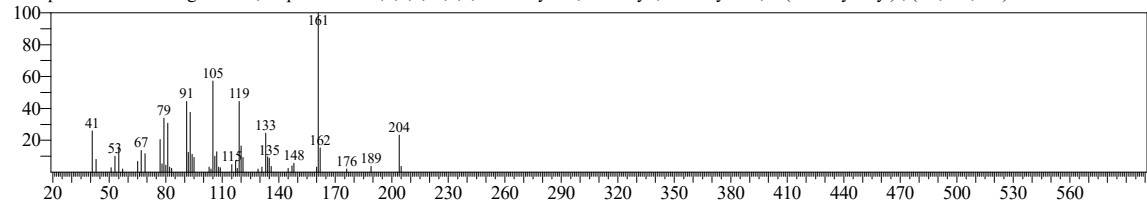

Hit#:3 Entry:204513 Library:W11N17MAIN1.lib

SI:93 Formula:C15H24 CAS:18252-44-3 MolWeight:204 RetIndex:1216

CompName:(1R,2S,6S,7S,8S)-8-Isopropyl-1-methyl-3-methylenetricyclo[4.4.0.0.2,7]decane-rel-

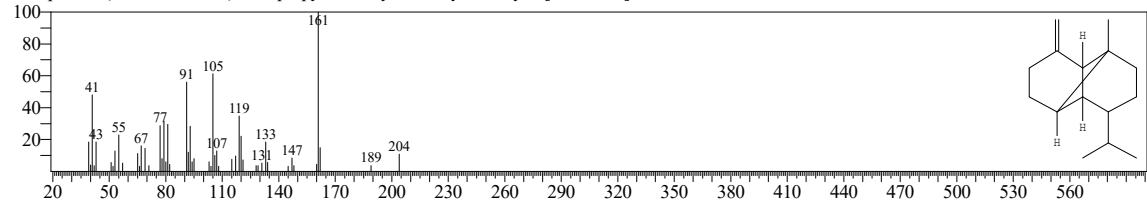

Hit#:4 Entry:75394 Library:NIST17.lib

SI:93 Formula:C15H24 CAS:13744-15-5 MolWeight:204 RetIndex:1339

CompName:1H-Cyclopenta[1,3]cyclopropa[1,2]benzene, octahydro-7-methyl-3-methylene-4-(1-methylethyl)-, [3aS-(3a.alpha.,3b.beta.,4.beta.,7.alpha.,7aS\*

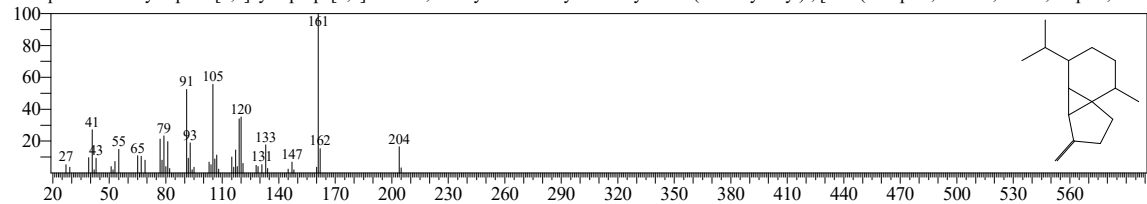

<< Target >>

Line#:24 R.Time:32.595(Scan#:5960) Retention Index:1473 MassPeaks:337

RawMode:Averaged 32.485-32.735(5938-5988) BasePeak:161.15(152941)

BG Mode:Calc. from Peak Group 1 - Event 1 Scan

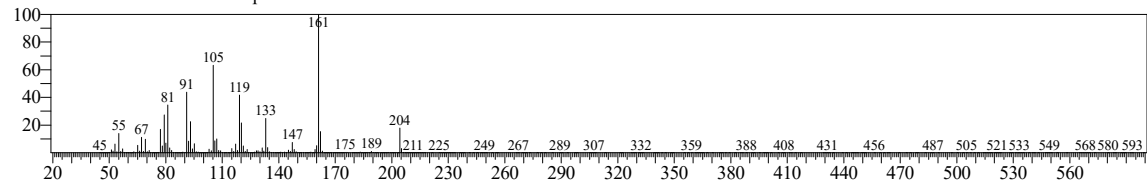

Hit#:5 Entry:203917 Library:W11N17MAIN1.lib

SI:93 Formula:C15H24 CAS:13744-15-5 MolWeight:204 RetIndex:1339

CompName:1H-Cyclopenta[1,3]cyclopropa[1,2]benzene, octahydro-7-methyl-3-methylene-4-(1-methylethyl)-, [3aS-(3a.alpha.,3b.beta.,4.beta.,7.alpha.,7aS\*

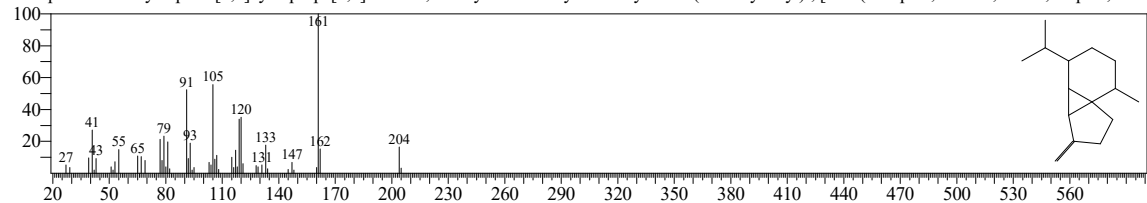

Hit#:6 Entry:75399 Library:NIST17.lib

SI:93 Formula:C15H24 CAS:18252-44-3 MolWeight:204 RetIndex:1216

CompName:(1R,2S,6S,7S,8S)-8-Isopropyl-1-methyl-3-methylenetricyclo[4.4.0.02,7]decane-rel-

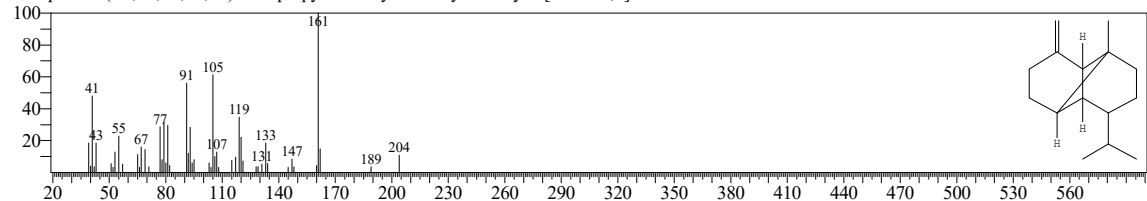

Hit#:7 Entry:203948 Library:W11N17MAIN1.lib

SI:93 Formula:C15H24 CAS:23986-74-5 MolWeight:204 RetIndex:1515

CompName:(-)-Germacrene D

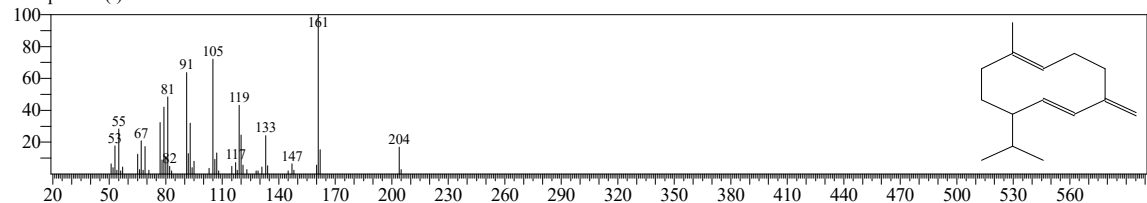

Hit#:8 Entry:75171 Library:NIST17.lib

SI:92 Formula:C15H24 CAS:18252-44-3 MolWeight:204 RetIndex:1216

CompName:(1R,2S,6S,7S,8S)-8-Isopropyl-1-methyl-3-methylenetricyclo[4.4.0.02,7]decane-rel-

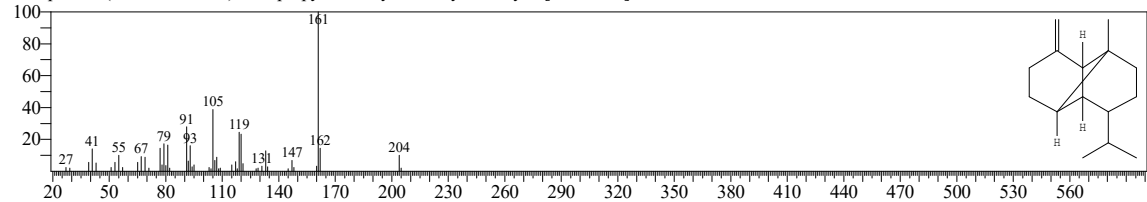

<< Target >>

Line#:24 R.Time:32.595(Scan#:5960) Retention Index:1473 MassPeaks:337

RawMode:Averaged 32.485-32.735(5938-5988) BasePeak:161.15(152941)

BG Mode:Calc. from Peak Group 1 - Event 1 Scan

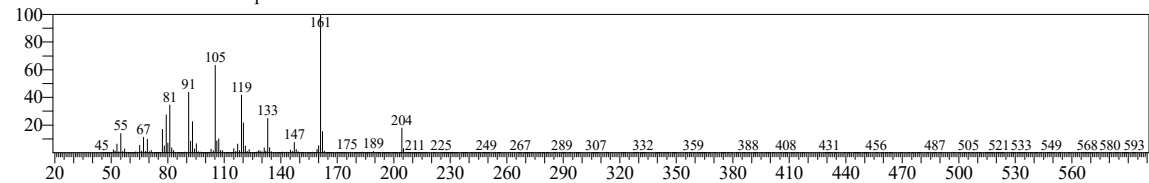

Hit#:9 Entry:204510 Library:W11N17MAIN1.lib

SI:92 Formula:C15H24 CAS:18252-44-3 MolWeight:204 RetIndex:1216

CompName:(1R,2S,6S,7S,8S)-8-Isopropyl-1-methyl-3-methylenetricyclo[4.4.0.0<sup>2,7</sup>]decane-rel-

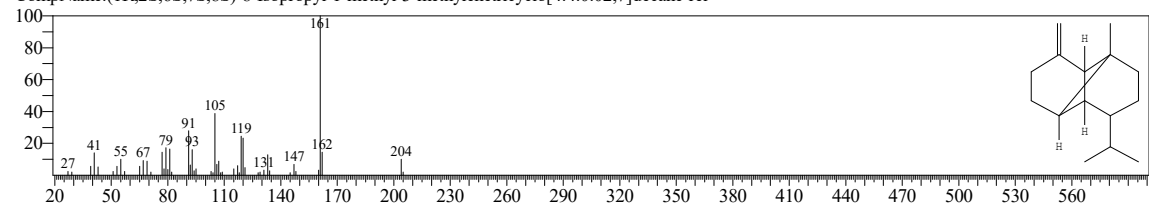

Hit#:10 Entry:203942 Library:W11N17MAIN1.lib

SI:92 Formula:C15H24 CAS:23986-74-5 MolWeight:204 RetIndex:1515

CompName:Germacrene D

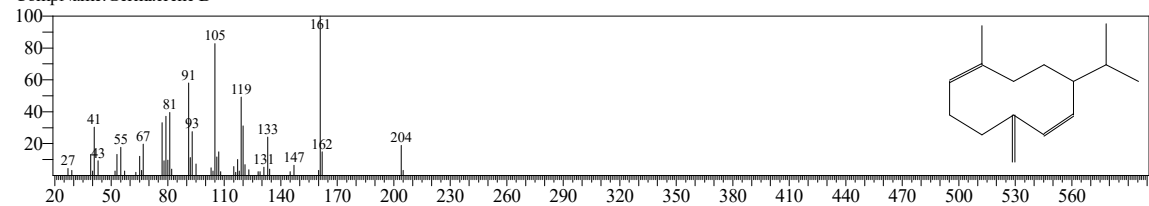



<< Target >>

Line#:25 R.Time:32.850(Scan#:6011) Retention Index:1479 MassPeaks:331

RawMode:Averaged 32.735-32.970(5988-6035) BasePeak:105.10(5127)

BG Mode:Calc. from Peak Group 1 - Event 1 Scan

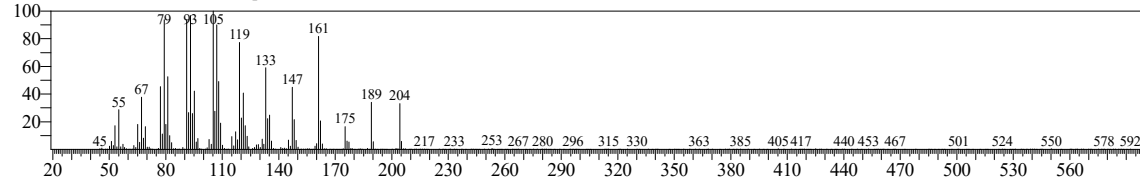

Hit#:1 Entry:828 Library:FFNSC 1.2.lib

SI:95 Formula:C15 H24 CAS:4630-07-3 MolWeight:204 RetIndex:1492

CompName:Valencene; Napthalene <1,2,3,5,6,7,8,8a-octahydro-, 1,8a-dimethyl-, 7-(1-methylethenyl)->

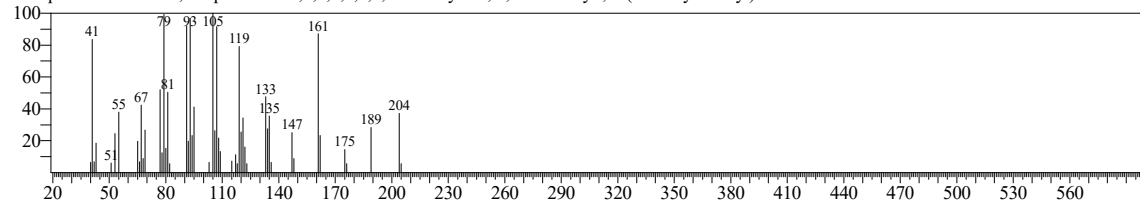

Hit#:2 Entry:75072 Library:NIST17.lib

SI:94 Formula:C15H24 CAS:10219-75-7 MolWeight:204 RetIndex:1474

CompName:Napthalene, 1,2,3,5,6,7,8,8a-octahydro-1,8a-dimethyl-7-(1-methylethenyl)-, [1S-(1.alpha.,7.alpha.,8a.alpha.)]-

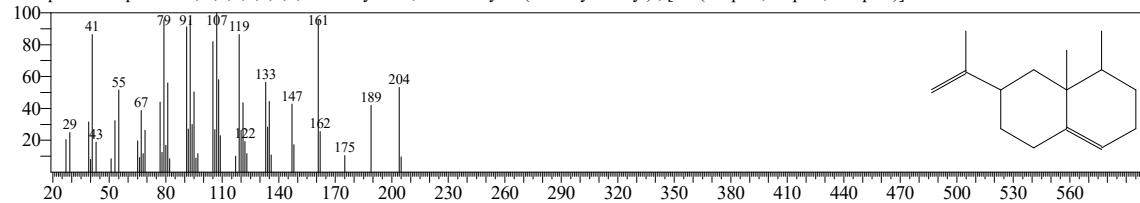

Hit#:3 Entry:204378 Library:W11N17MAIN1.lib

SI:94 Formula:C15H24 CAS:10219-75-7 MolWeight:204 RetIndex:1474

CompName:Napthalene, 1,2,3,5,6,7,8,8a-octahydro-1,8a-dimethyl-7-(1-methylethenyl)-, [1S-(1.alpha.,7.alpha.,8a.alpha.)]-

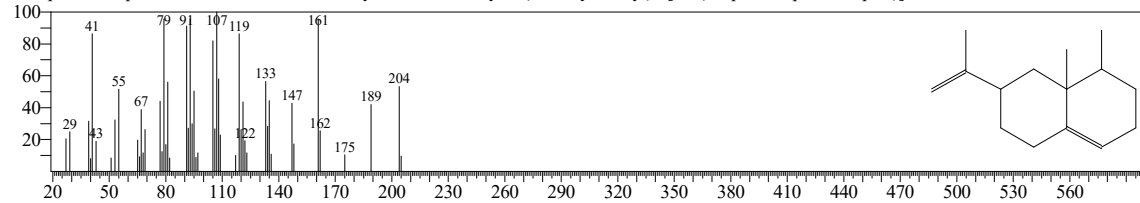

Hit#:4 Entry:204374 Library:W11N17MAIN1.lib

SI:94 Formula:C15H24 CAS:10219-75-7 MolWeight:204 RetIndex:1474

CompName:4.beta.H,5.alpha.-Eremophila-1(10),11-diene

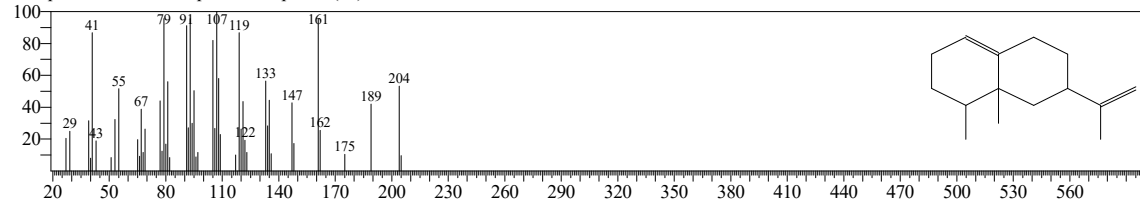

<< Target >>

Line#:25 R.Time:32.850(Scan#:6011) Retention Index:1479 MassPeaks:331

RawMode:Averaged 32.735-32.970(5988-6035) BasePeak:105.10(5127)

BG Mode:Calc. from Peak Group 1 - Event 1 Scan

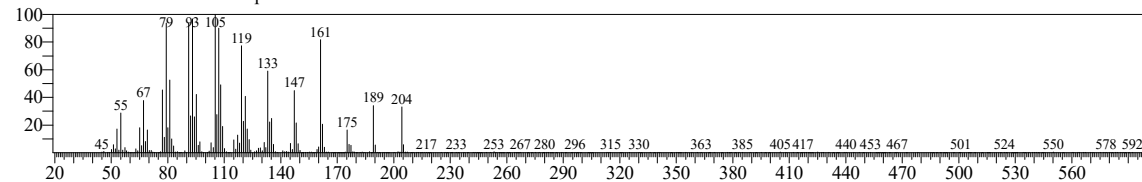

Hit#:5 Entry:204376 Library:W11N17MAIN1.lib

SI:94 Formula:C15H24 CAS:4630-07-3 MolWeight:204 RetIndex:1474

CompName:4.beta.H.5.alpha.-Eremophila-1(10),11-diene

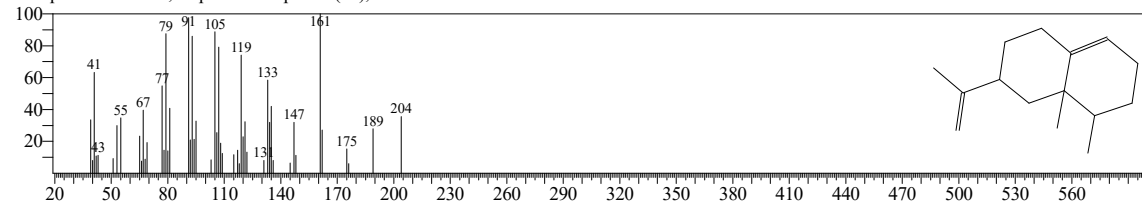

Hit#:6 Entry:75317 Library:NIST17.lib

SI:93 Formula:C15H24 CAS:17066-67-0 MolWeight:204 RetIndex:1469

CompName:Naphthalene, decahydro-4a-methyl-1-methylene-7-(1-methylethenyl)-, [4aR-(4a.alpha.,7.alpha.,8a.beta.)]-

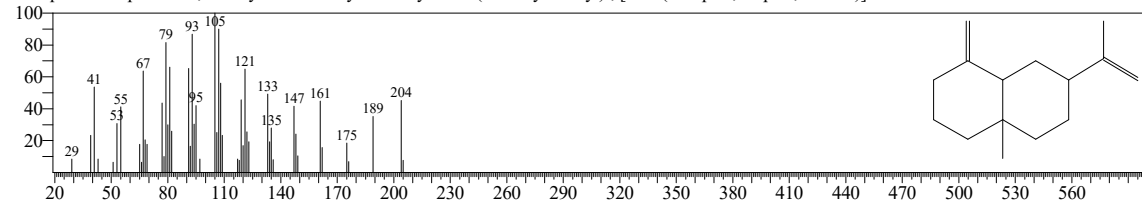

Hit#:7 Entry:204796 Library:W11N17MAIN1.lib

SI:93 Formula:C15H24 CAS:17066-67-0 MolWeight:204 RetIndex:1469

CompName:Naphthalene, decahydro-4a-methyl-1-methylene-7-(1-methylethenyl)-, [4aR-(4a.alpha.,7.alpha.,8a.beta.)]-

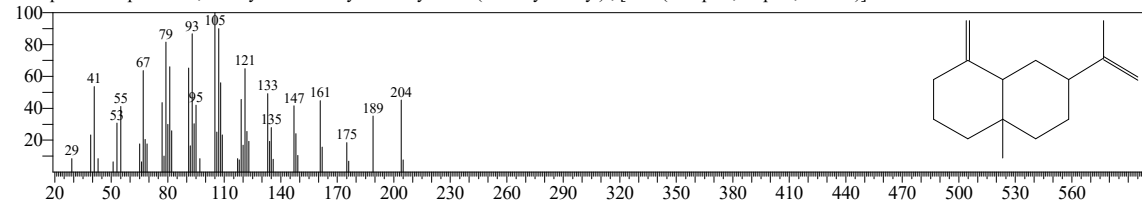

Hit#:8 Entry:204048 Library:W11N17MAIN1.lib

SI:93 Formula:C15H24 CAS:25246-27-9 MolWeight:204 RetIndex:1386

CompName:Alloaromadendrene

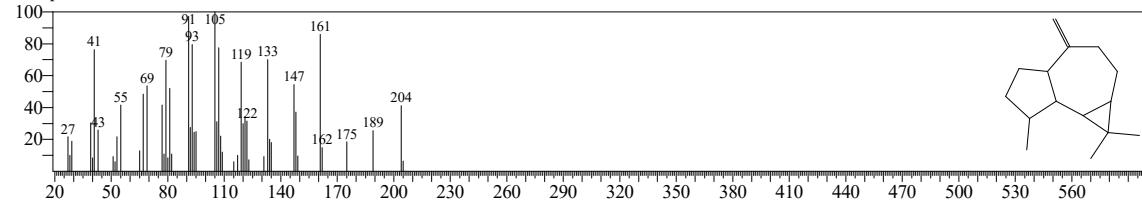

<< Target >>

Line#:25 R.Time:32.850(Scan#:6011) Retention Index:1479 MassPeaks:331

RawMode:Averaged 32.735-32.970(5988-6035) BasePeak:105.10(5127)

BG Mode:Calc. from Peak Group 1 - Event 1 Scan

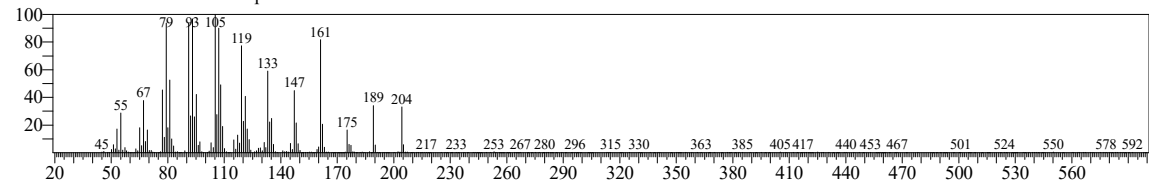

Hit#:9 Entry:75312 Library:NIST17.lib

SI:93 Formula:C15H24 CAS:25246-27-9 MolWeight:204 RetIndex:1386

CompName:Alloaromadendrene

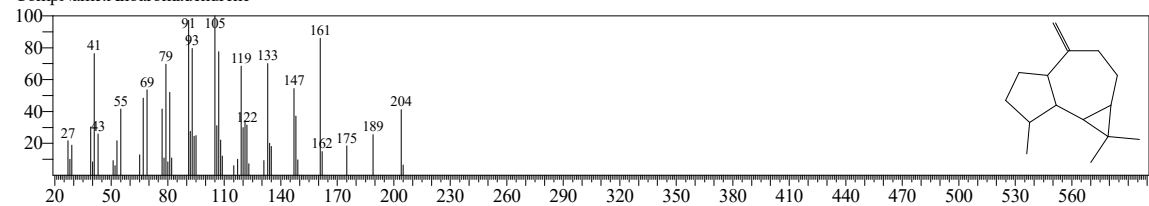

Hit#:10 Entry:1031 Library:FFNSC 1.2.lib

SI:92 Formula:C15H24 CAS:489-39-4 MolWeight:204 RetIndex:1438

CompName:Aromadendrene; Cycloprop[e]azulene <1H-, decahydro-, 1,1,7-trimethyl-, 4-methylene-, (1aR,4aR,7R,7aR,7bS)->

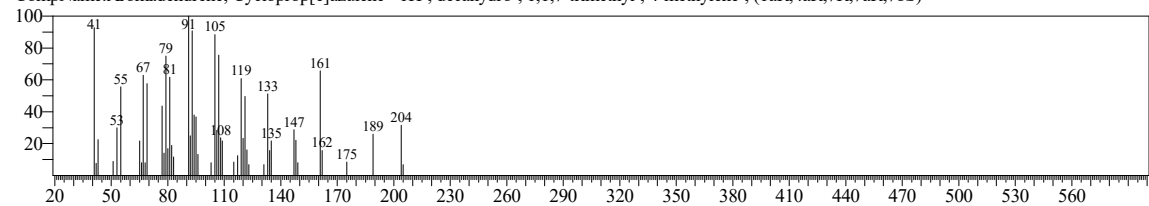

<< Target >>

Line#:26 R.Time:33.210(Scan#:6083) Retention Index:1488 MassPeaks:311

RawMode:Averaged 33.080-33.325(6057-6106) BasePeak:121.10(17145)

BG Mode:Calc. from Peak Group 1 - Event 1 Scan

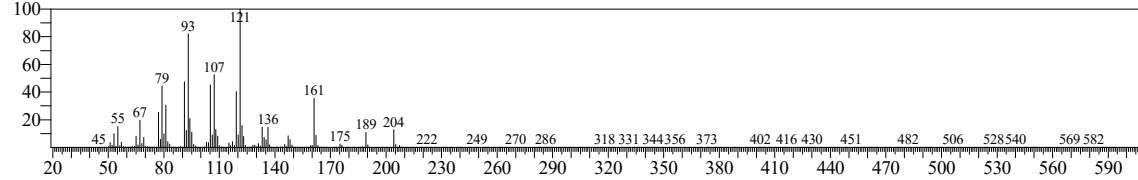

Hit#:1 Entry:204569 Library:W11N17MAIN1.lib

SI:95 Formula:C15H24 CAS:24703-35-3 MolWeight:204 RetIndex:1499

CompName:(1S,2E,6E,10R)-3,7,11,11-Tetramethylbicyclo[8.1.0]undeca-2,6-diene

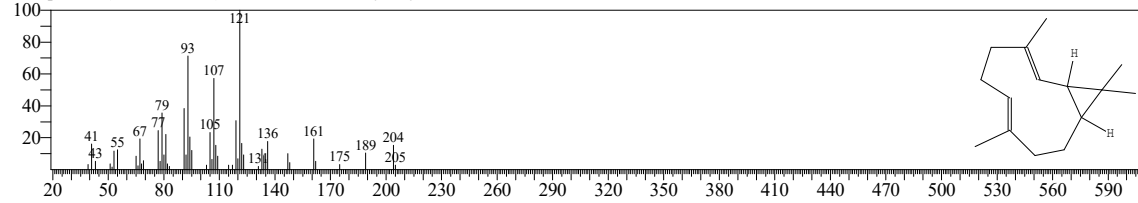

Hit#:2 Entry:75124 Library:NIST17.lib

SI:95 Formula:C15H24 CAS:24703-35-3 MolWeight:204 RetIndex:1499

CompName:(1S,2E,6E,10R)-3,7,11,11-Tetramethylbicyclo[8.1.0]undeca-2,6-diene

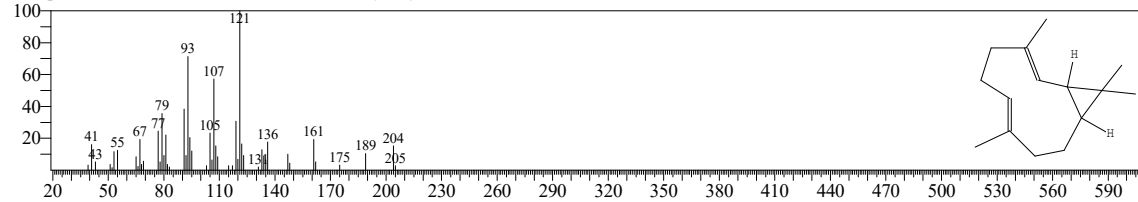

Hit#:3 Entry:1110 Library:FFNSC 1.2.lib

SI:95 Formula:C15H24 CAS:24703-35-3 MolWeight:204 RetIndex:1497

CompName:Bicyclogermacrene; Bicyclo[8.1.0]undeca-2,6-diene <3,7,11,11-tetramethyl-, (1S,2E,6E,10R)->

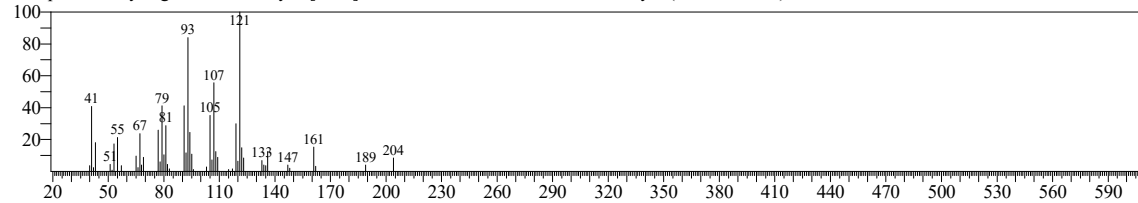

Hit#:4 Entry:204567 Library:W11N17MAIN1.lib

SI:92 Formula:C15H24 CAS:100762-46-7 MolWeight:204 RetIndex:1499

CompName:Bicyclogermacrene

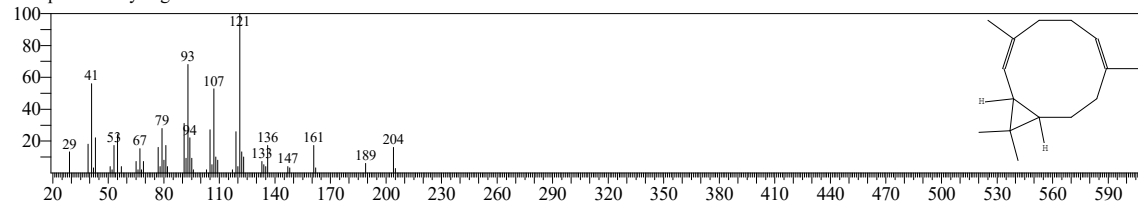

<< Target >>

Line#:26 R.Time:33.210(Scan#:6083) Retention Index:1488 MassPeaks:311

RawMode:Averaged 33.080-33.325(6057-6106) BasePeak:121.10(17145)

BG Mode:Calc. from Peak Group 1 - Event 1 Scan

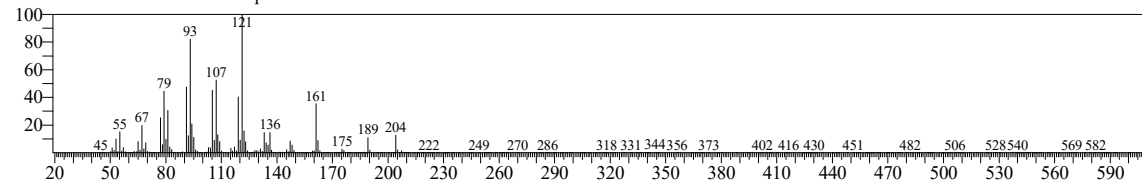

Hit#:5 Entry:1080 Library:FFNSC 1.2.lib

SI:91 Formula:C15H24 CAS:15423-57-1 MolWeight:204 RetIndex:1557

CompName:Germacrene B; Cyclodeca-1(E),5(E)-diene <1,5-dimethyl-, 8-(1-methylethylidene)->

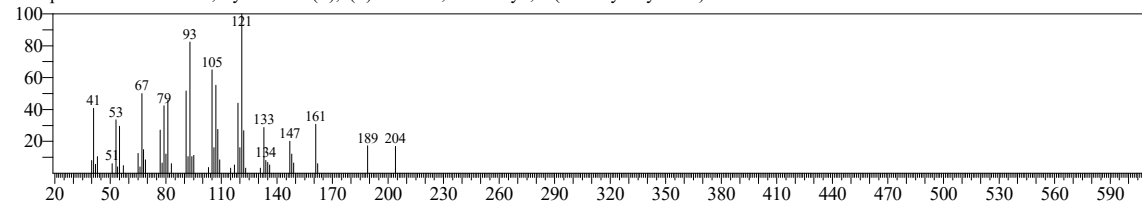

Hit#:6 Entry:75368 Library:NIST17.lib

SI:91 Formula:C15H24 CAS:15423-57-1 MolWeight:204 RetIndex:1603

CompName:1,5-Cyclodecadiene, 1,5-dimethyl-8-(1-methylethylidene)-, (E,E)-

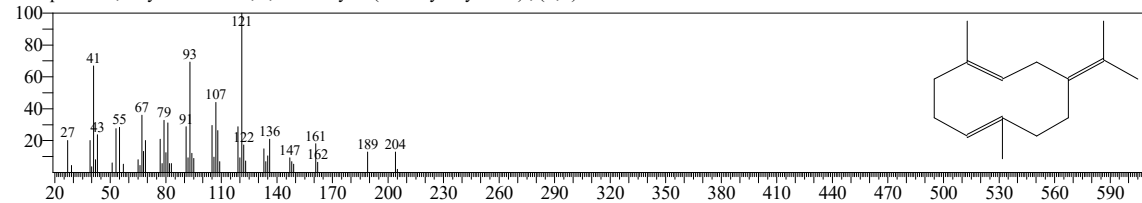

Hit#:7 Entry:203965 Library:W11N17MAIN1.lib

SI:91 Formula:C15H24 CAS:15423-57-1 MolWeight:204 RetIndex:1603

CompName:1,5-Cyclodecadiene, 1,5-dimethyl-8-(1-methylethylidene)-, (E,E)-

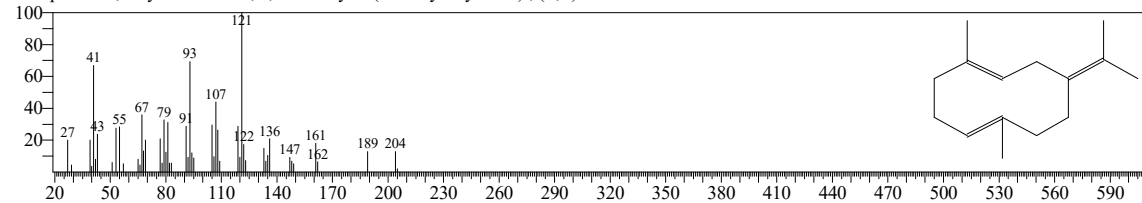

Hit#:8 Entry:203967 Library:W11N17MAIN1.lib

SI:91 Formula:C15H24 CAS:15423-57-1 MolWeight:204 RetIndex:1603

CompName:1,5-Cyclodecadiene, 1,5-dimethyl-8-(1-methylethylidene)-, (E,E)-

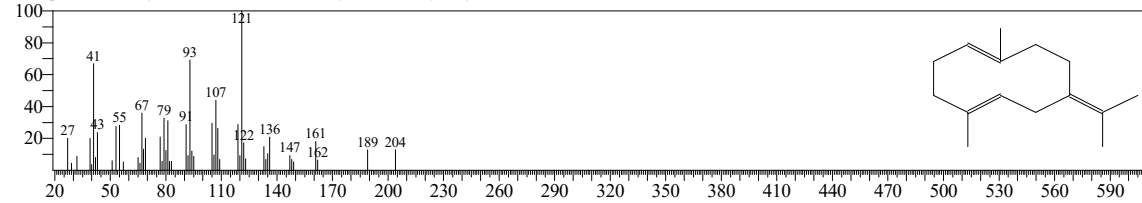

<< Target >>

Line#:26 R.Time:33.210(Scan#:6083) Retention Index:1488 MassPeaks:311

RawMode:Averaged 33.080-33.325(6057-6106) BasePeak:121.10(17145)

BG Mode:Calc. from Peak Group 1 - Event 1 Scan

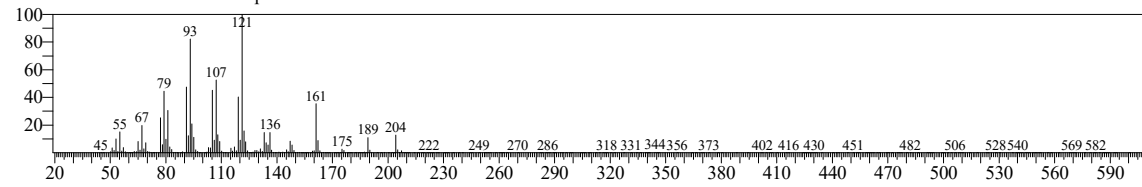

Hit#:9 Entry:203964 Library:W11N17MAIN1.lib

SI:91 Formula:C15H24 CAS:15423-57-1 MolWeight:204 RetIndex:1603

CompName:1,5-Cyclodecadiene, 1,5-dimethyl-8-(1-methylethylidene)-, (E,E)-

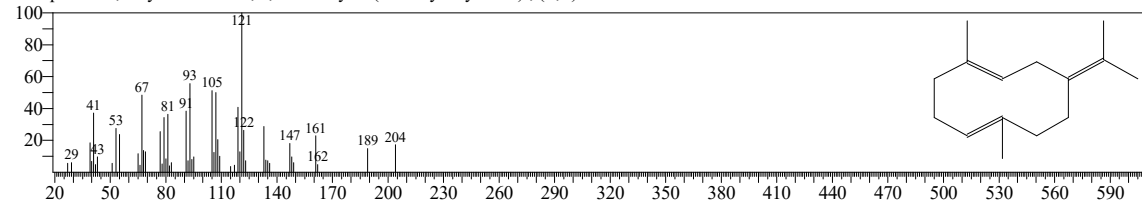

Hit#:10 Entry:75122 Library:NIST17.lib

SI:91 Formula:C15H24 CAS:15423-57-1 MolWeight:204 RetIndex:1603

CompName:1,5-Cyclodecadiene, 1,5-dimethyl-8-(1-methylethylidene)-, (E,E)-

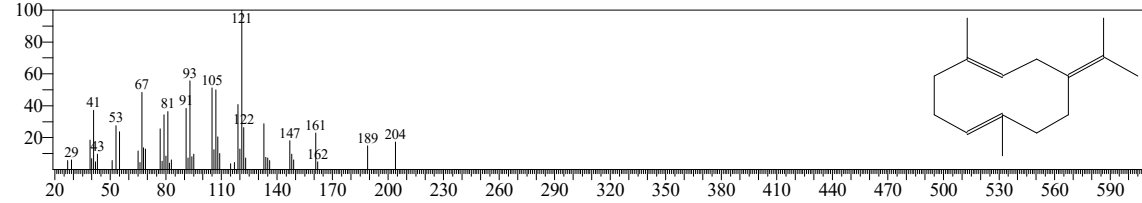

<< Target >>

Line#:27 R.Time:33.375(Scan#:6116) Retention Index:1492 MassPeaks:291

RawMode:Averaged 33.325-33.460(6106-6133) BasePeak:105.10(2667)

BG Mode:Calc. from Peak Group 1 - Event 1 Scan

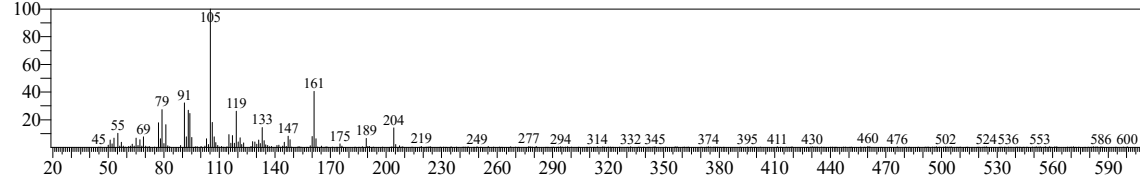

Hit#:1 Entry:1052 Library:FFNSC 1.2.lib

SI:93 Formula:C15H24 CAS:10208-80-7 MolWeight:204 RetIndex:1497

CompName:Muurolene <alpha->; Naphthalene <1,2,4a,5,6,8a-hexahydro-, 4,7-dimethyl-, 1-(1-methylethyl)-, (1S,4aS,8aR)->

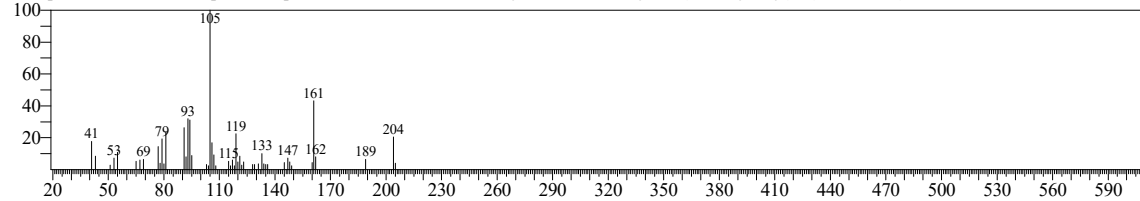

Hit#:2 Entry:204387 Library:W11N17MAIN1.lib

SI:93 Formula:C15H24 CAS:10208-80-7 MolWeight:204 RetIndex:1440

CompName:.alpha.-Muurolene

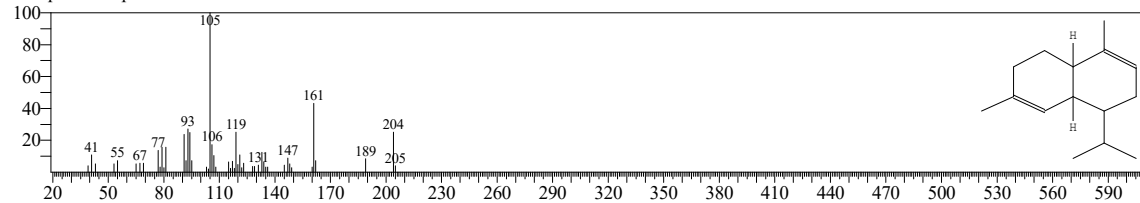

Hit#:3 Entry:75325 Library:NIST17.lib

SI:93 Formula:C15H24 CAS:10208-80-7 MolWeight:204 RetIndex:1440

CompName:.alpha.-Muurolene

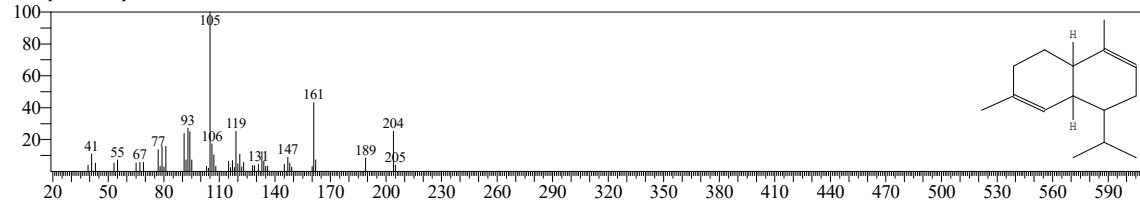

Hit#:4 Entry:204395 Library:W11N17MAIN1.lib

SI:93 Formula:C15H24 CAS:31983-22-9 MolWeight:204 RetIndex:1440

CompName:.alpha.-Muurolene

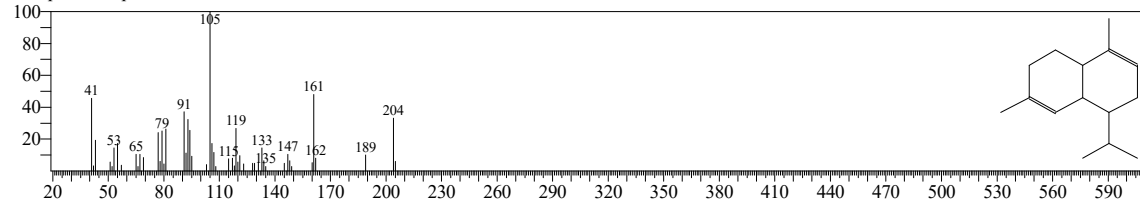

<< Target >>

Line#:27 R.Time:33.375(Scan#:6116) Retention Index:1492 MassPeaks:291

RawMode:Averaged 33.325-33.460(6106-6133) BasePeak:105.10(2667)

BG Mode:Calc. from Peak Group 1 - Event 1 Scan

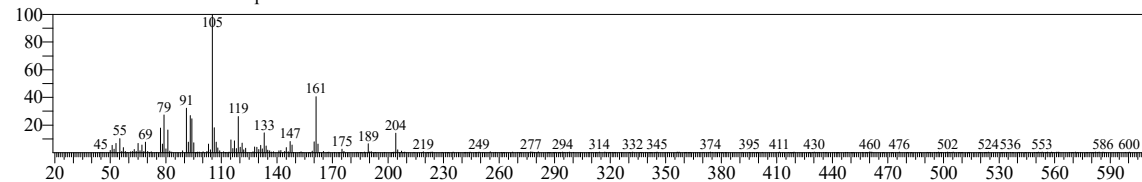

Hit#:5 Entry:75323 Library:NIST17.lib

SI:93 Formula:C15H24 CAS:31983-22-9 MolWeight:204 RetIndex:1440

CompName:alpha.-Muurolene

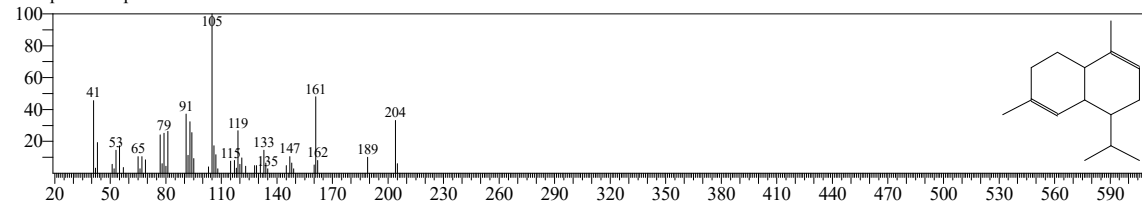

Hit#:6 Entry:204391 Library:W11N17MAIN1.lib

SI:92 Formula:C15H24 CAS:24406-05-1 MolWeight:204 RetIndex:1440

CompName:Naphthalene, 1,2,4a,5,6,8a-hexahydro-4,7-dimethyl-1-(1-methylethyl)-, [1S-(1.alpha.,4a.beta.,8a.alpha.)]-

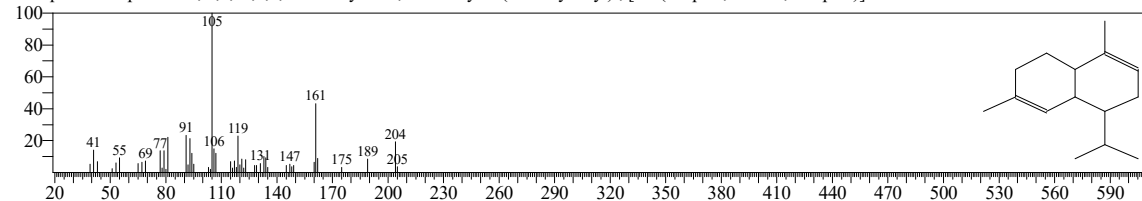

Hit#:7 Entry:75324 Library:NIST17.lib

SI:92 Formula:C15H24 CAS:24406-05-1 MolWeight:204 RetIndex:1440

CompName:Naphthalene, 1,2,4a,5,6,8a-hexahydro-4,7-dimethyl-1-(1-methylethyl)-, [1S-(1.alpha.,4a.beta.,8a.alpha.)]-

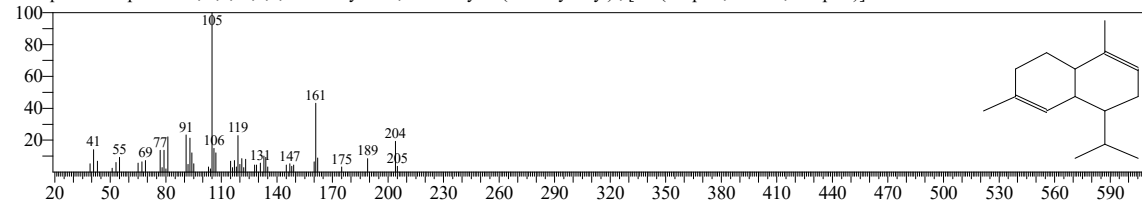

Hit#:8 Entry:204385 Library:W11N17MAIN1.lib

SI:91 Formula:C15H24 CAS:20085-19-2 MolWeight:204 RetIndex:1440

CompName:(1R,4aS,8aR)-1-Isopropyl-4,7-dimethyl-1,2,4a,5,6,8a-hexahydronaphthalene

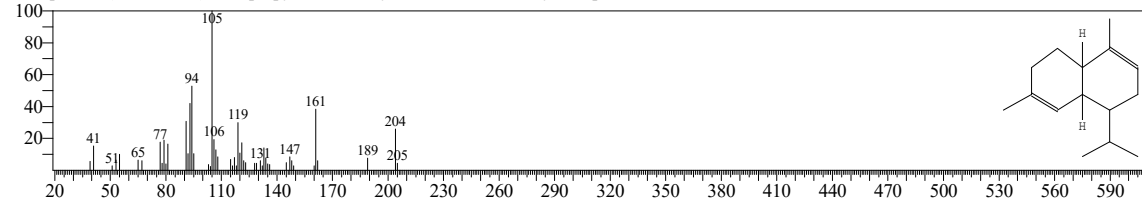



<< Target >>

Line#:27 R.Time:33.375(Scan#:6116) Retention Index:1492 MassPeaks:291

RawMode:Averaged 33.325-33.460(6106-6133) BasePeak:105.10(2667)

BG Mode:Calc. from Peak Group 1 - Event 1 Scan

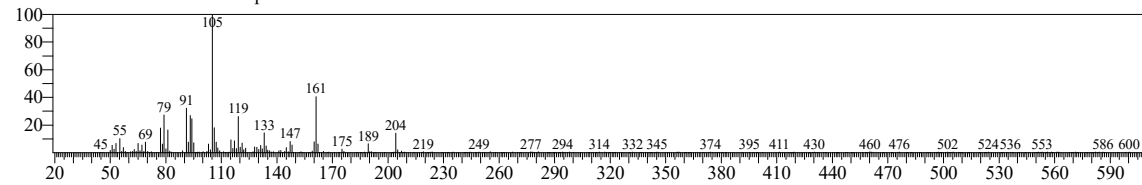

Hit#:9 Entry:75054 Library:NIST17.lib

SI:91 Formula:C15H24 CAS:20085-19-2 MolWeight:204 RetIndex:1440

CompName:(1R,4aS,8aR)-1-Isopropyl-4,7-dimethyl-1,2,4a,5,6,8a-hexahydronaphthalene

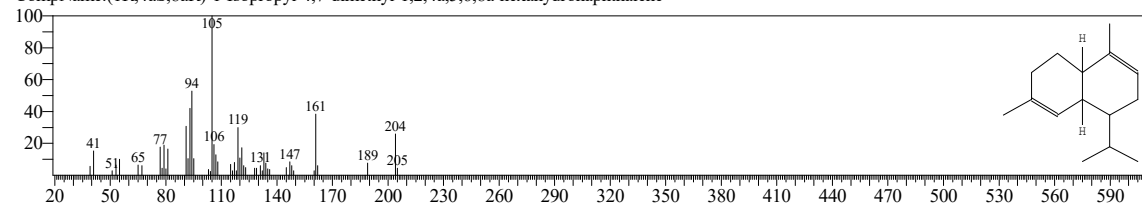

Hit#:10 Entry:75064 Library:NIST17.lib

SI:90 Formula:C15H24 CAS:483-75-0 MolWeight:204 RetIndex:1440

CompName:Naphthalene, 1,2,4a,5,6,8a-hexahydro-4,7-dimethyl-1-(1-methylethyl)-

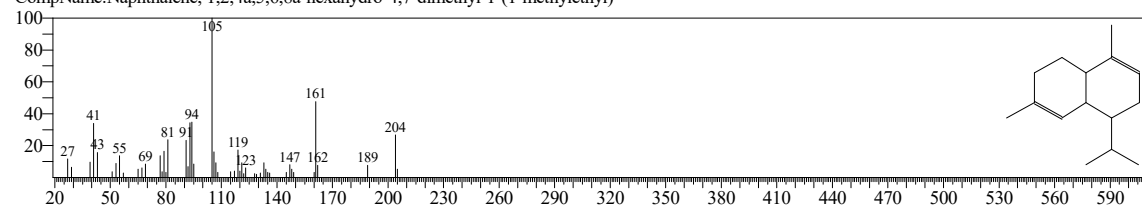

<< Target >>

Line#:28 R.Time:33.555(Scan#:6152) Retention Index:1496 MassPeaks:358

RawMode:Averaged 33.480-33.645(6137-6170) BasePeak:93.10(4853)

BG Mode:Calc. from Peak Group 1 - Event 1 Scan

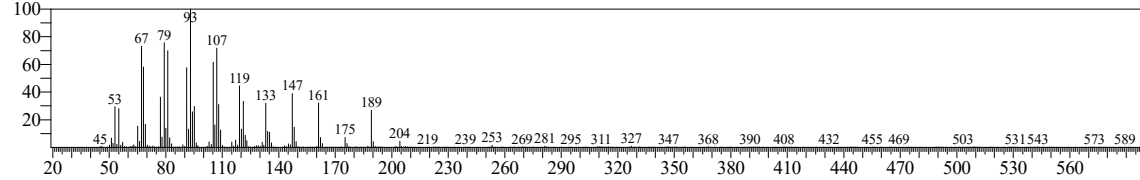

Hit#:1 Entry:204302 Library:W11N17MAIN1.lib

SI:95 Formula:C15H24 CAS:515-13-9 MolWeight:204 RetIndex:1398

CompName:1-Methyl-1-ethenyl-2,4-bis(1-methylethenyl)cyclohexane

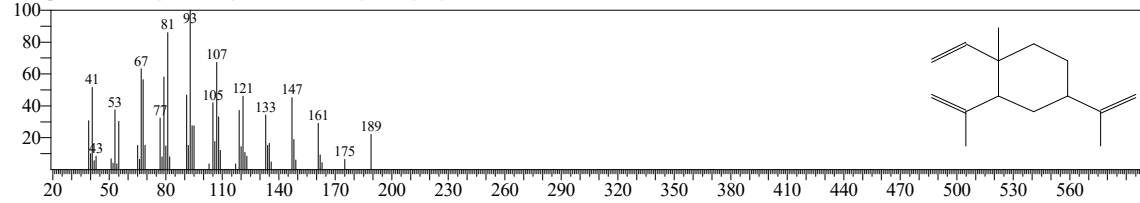

Hit#:2 Entry:204298 Library:W11N17MAIN1.lib

SI:93 Formula:C15H24 CAS:515-13-9 MolWeight:204 RetIndex:1398

CompName:Cyclohexane, 1-ethenyl-1-methyl-2,4-bis(1-methylethenyl)-, [1S-(1.alpha.,2.beta.,4.beta.)]-

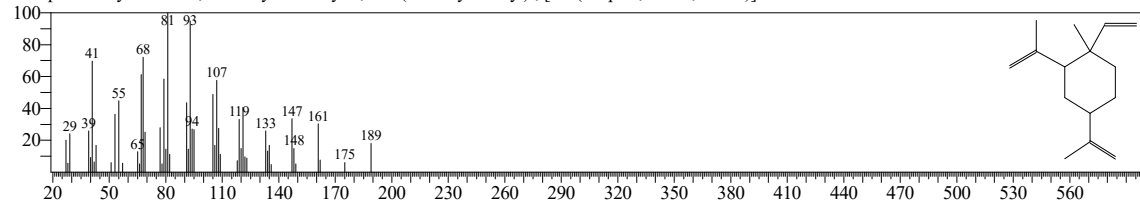

Hit#:3 Entry:75270 Library:NIST17.lib

SI:93 Formula:C15H24 CAS:515-13-9 MolWeight:204 RetIndex:1398

CompName:Cyclohexane, 1-ethenyl-1-methyl-2,4-bis(1-methylethenyl)-, [1S-(1.alpha.,2.beta.,4.beta.)]-



Hit#:4 Entry:204706 Library:W11N17MAIN1.lib

SI:92 Formula:C15H24 CAS:28387-44-2 MolWeight:204 RetIndex:1570

CompName:Germacra-3,9,11-triene, (E,E)-

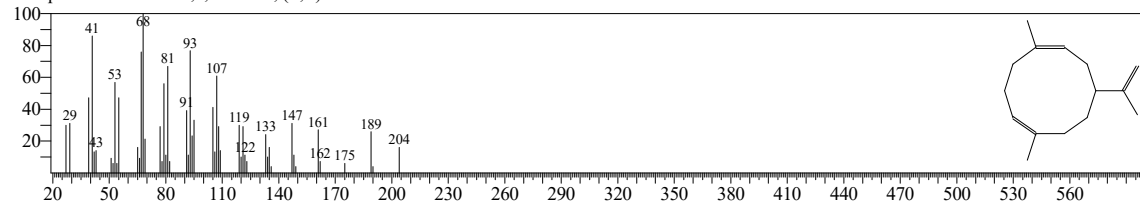

<< Target >>

Line#:28 R.Time:33.555(Scan#:6152) Retention Index:1496 MassPeaks:358

RawMode:Averaged 33.480-33.645(6137-6170) BasePeak:93.10(4853)

BG Mode:Calc. from Peak Group 1 - Event 1 Scan

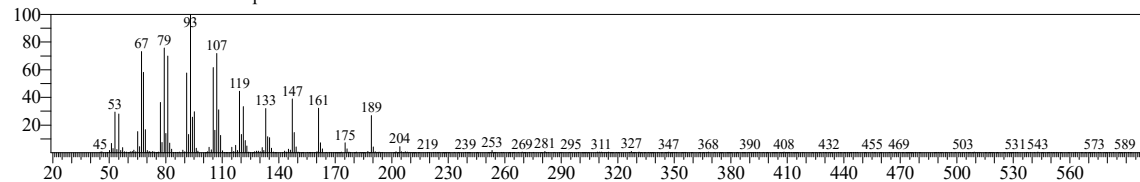

Hit#:5 Entry:204301 Library:W11N17MAIN1.lib

SI:91 Formula:C15H24 CAS:515-13-9 MolWeight:204 RetIndex:1398

CompName:Cyclohexane, 1-ethenyl-1-methyl-2,4-bis(1-methylethenyl)-, [1S-(1.alpha.,2.beta.,4.beta.)]-

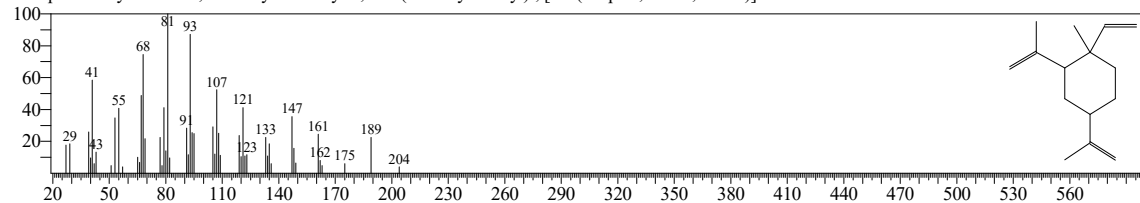

Hit#:6 Entry:75005 Library:NIST17.lib

SI:91 Formula:C15H24 CAS:515-13-9 MolWeight:204 RetIndex:1398

CompName:Cyclohexane, 1-ethenyl-1-methyl-2,4-bis(1-methylethenyl)-, [1S-(1.alpha.,2.beta.,4.beta.)]-

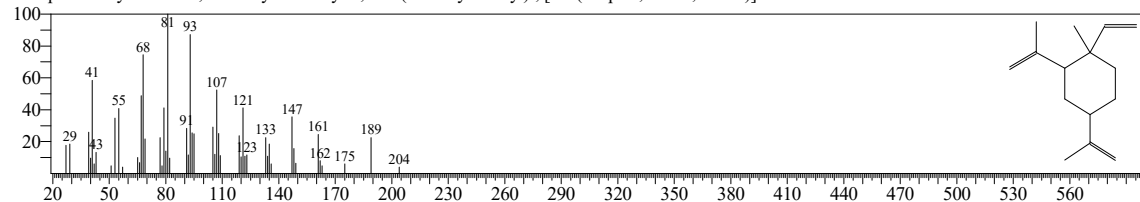

Hit#:7 Entry:204295 Library:W11N17MAIN1.lib

SI:91 Formula:C15H24 CAS:515-13-9 MolWeight:204 RetIndex:1398

CompName:1-Methyl-1-ethenyl-2,4-bis(1'-methylethenyl)cyclohexane

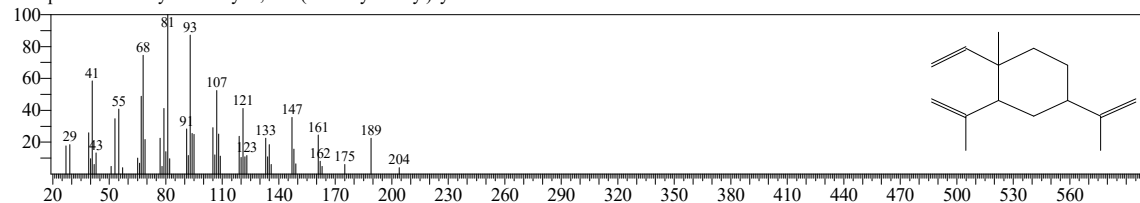

Hit#:8 Entry:204739 Library:W11N17MAIN1.lib

SI:91 Formula:C15H24 CAS:3691-11-0 MolWeight:204 RetIndex:1490

CompName:delta-Guaiene

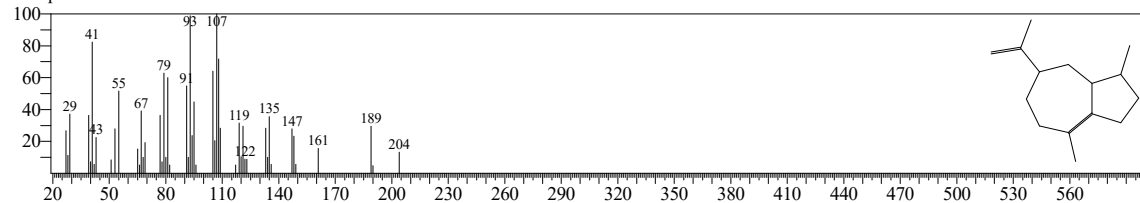

<< Target >>

Line#:28 R.Time:33.555(Scan#:6152) Retention Index:1496 MassPeaks:358

RawMode:Averaged 33.480-33.645(6137-6170) BasePeak:93.10(4853)

BG Mode:Calc. from Peak Group 1 - Event 1 Scan

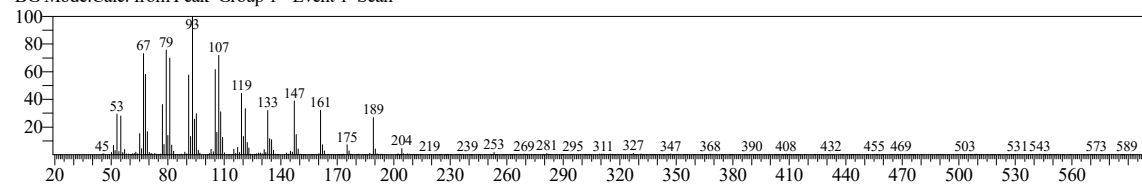

Hit#:9 Entry:965 Library:FFNSC 1.2.lib

SI:91 Formula:C15 H24 CAS:33380-83-9 MolWeight:204 RetIndex:1390

CompName:Elemene <beta->; Cyclohexane <1-ethenyl-, 1-methyl-, 2,4-bis(1-methylethenyl)->

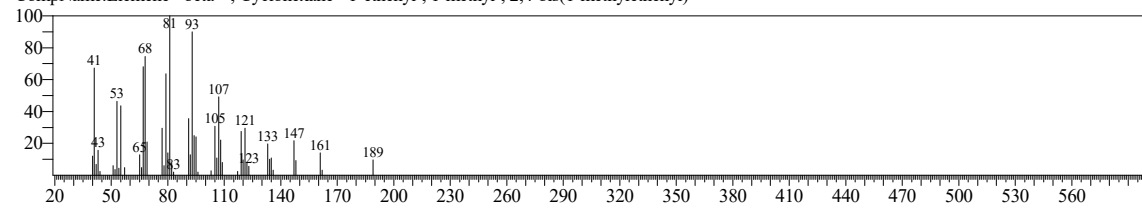

Hit#:10 Entry:204744 Library:W11N17MAIN1.lib

SI:91 Formula:C15H24 CAS:3691-11-0 MolWeight:204 RetIndex:1490

CompName:Azulene, 1,2,3,5,6,7,8,8a-octahydro-1,4-dimethyl-7-(1-methylethenyl)-, [1S-(1.alpha.,7.alpha.,8a.beta.)]-

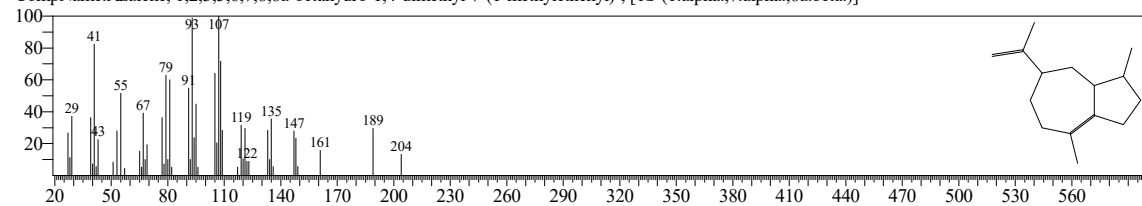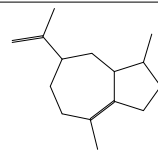

<< Target >>

Line#:29 R.Time:33.925(Scan#:6226) Retention Index:1505 MassPeaks:318

RawMode:Averaged 33.865-34.040(6214-6249) BasePeak:161.15(1481)

BG Mode:Calc. from Peak Group 1 - Event 1 Scan

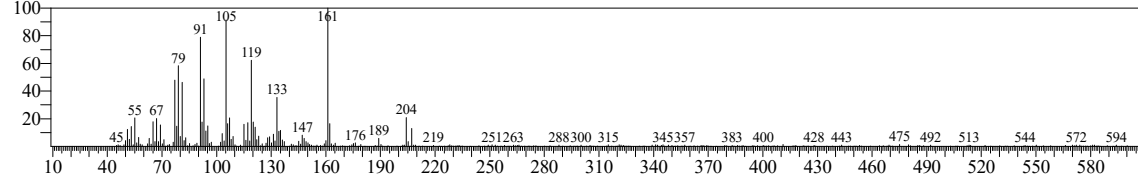

Hit#:1 Entry:75400 Library:NIST17.lib

SI:92 Formula:C15H24 CAS:483-75-0 MolWeight:204 RetIndex:1440

CompName:Naphthalene, 1,2,4a,5,6,8a-hexahydro-4,7-dimethyl-1-(1-methylethyl)-

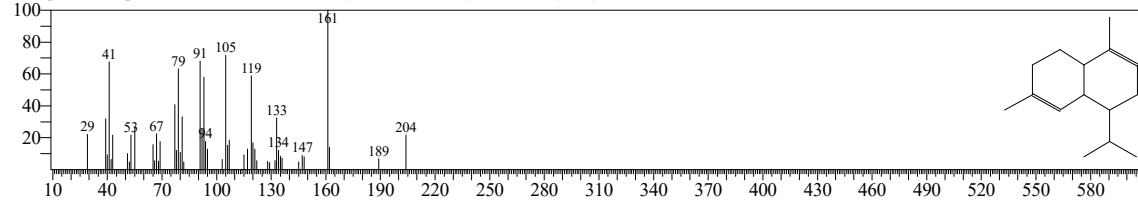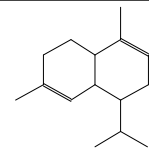

Hit#:2 Entry:204394 Library:W11N17MAIN1.lib

SI:92 Formula:C15H24 CAS:483-75-0 MolWeight:204 RetIndex:1440

CompName:Naphthalene, 1,2,4a,5,6,8a-hexahydro-4,7-dimethyl-1-(1-methylethyl)-

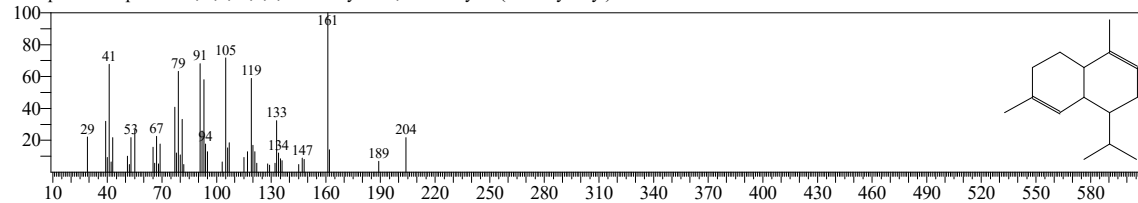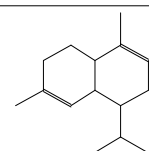

Hit#:3 Entry:203941 Library:W11N17MAIN1.lib

SI:91 Formula:C15H24 CAS:317819-80-0 MolWeight:204 RetIndex:1515

CompName:(S,1Z,6Z)-8-Isopropyl-1-methyl-5-methylenecyclodeca-1,6-diene

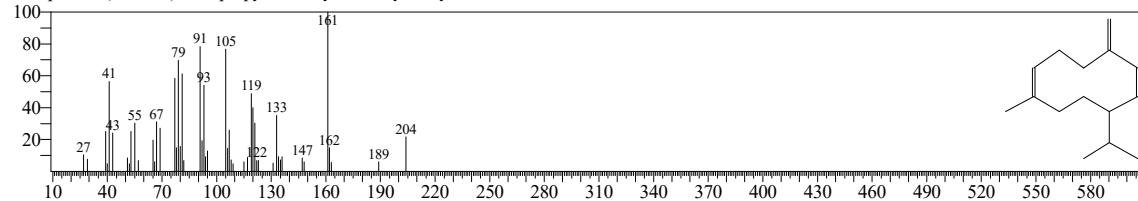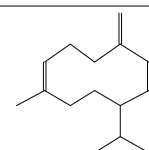

Hit#:4 Entry:75163 Library:NIST17.lib

SI:91 Formula:C15H24 CAS:317819-80-0 MolWeight:204 RetIndex:1515

CompName:(S,1Z,6Z)-8-Isopropyl-1-methyl-5-methylenecyclodeca-1,6-diene

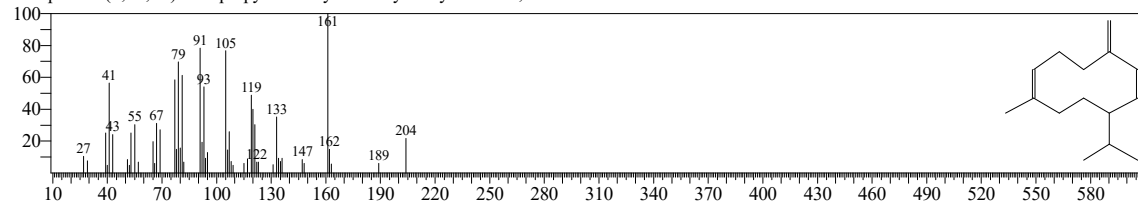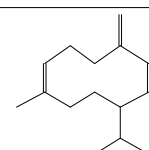

<< Target >>

Line#:29 R.Time:33.925(Scan#:6226) Retention Index:1505 MassPeaks:318

RawMode:Averaged 33.865-34.040(6214-6249) BasePeak:161.15(1481)

BG Mode:Calc. from Peak Group 1 - Event 1 Scan

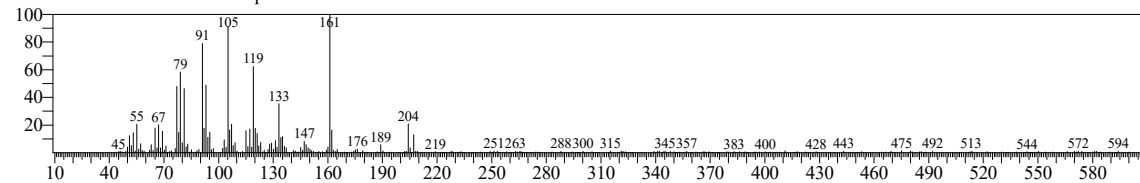

Hit#:5 Entry:75384 Library:NIST17.lib

SI:91 Formula:C15H24 CAS:30021-74-0 MolWeight:204 RetIndex:1435

CompName:gamma.-Muurolene

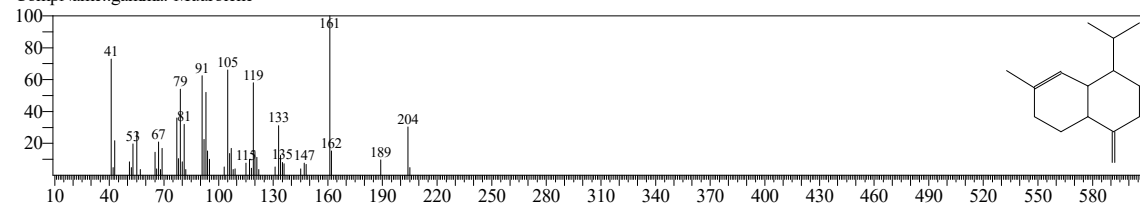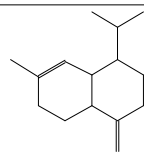

Hit#:6 Entry:204652 Library:W11N17MAIN1.lib

SI:91 Formula:C15H24 CAS:30021-74-0 MolWeight:204 RetIndex:1435

CompName:gamma.-Muurolene

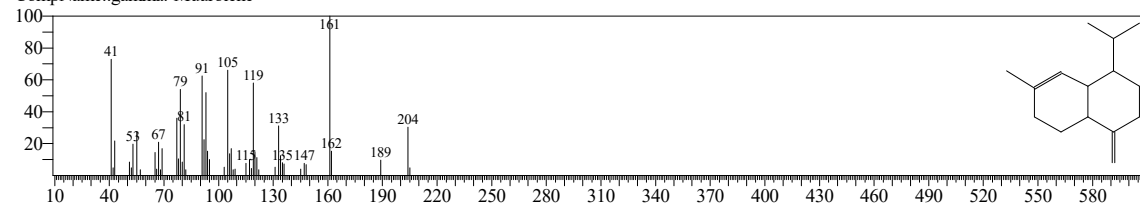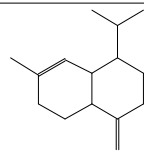

Hit#:7 Entry:203949 Library:W11N17MAIN1.lib

SI:91 Formula:C15H24 CAS:23986-74-5 MolWeight:204 RetIndex:1515

CompName:(-)-Germacrene D

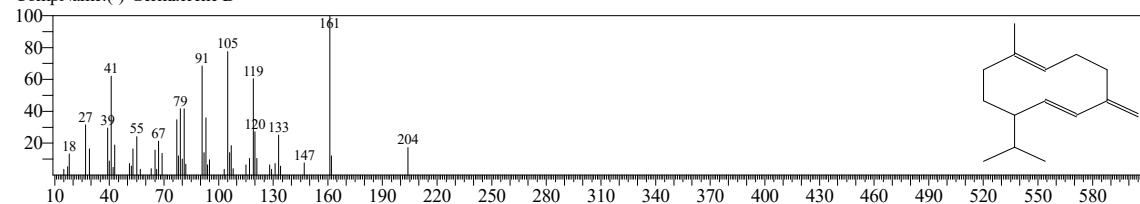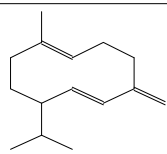

Hit#:8 Entry:204512 Library:W11N17MAIN1.lib

SI:90 Formula:C15H24 CAS:18252-44-3 MolWeight:204 RetIndex:1216

CompName:(1R,2S,6S,7S,8S)-8-Isopropyl-1-methyl-3-methylenetricyclo[4.4.0.02,7]decane-rel-

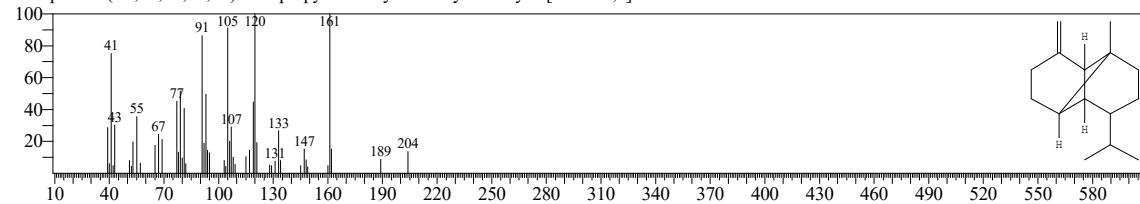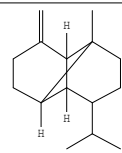

<< Target >>

Line#:29 R.Time:33.925(Scan#:6226) Retention Index:1505 MassPeaks:318

RawMode:Averaged 33.865-34.040(6214-6249) BasePeak:161.15(1481)

BG Mode:Calc. from Peak Group 1 - Event 1 Scan

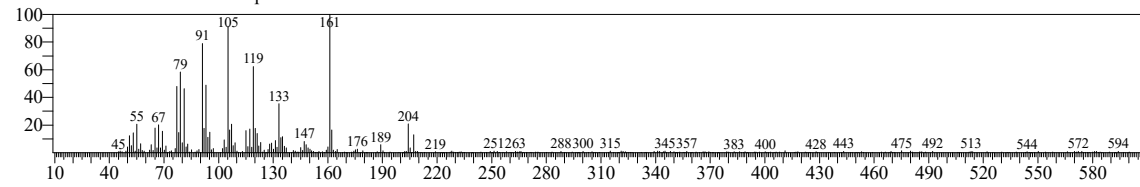

Hit#:9 Entry:75366 Library:NIST17.lib

SI:90 Formula:C15H24 CAS:18252-44-3 MolWeight:204 RetIndex:1216

CompName:(1R,2S,6S,7S,8S)-8-Isopropyl-1-methyl-3-methylenetricyclo[4.4.0.02,7]decane-rel-

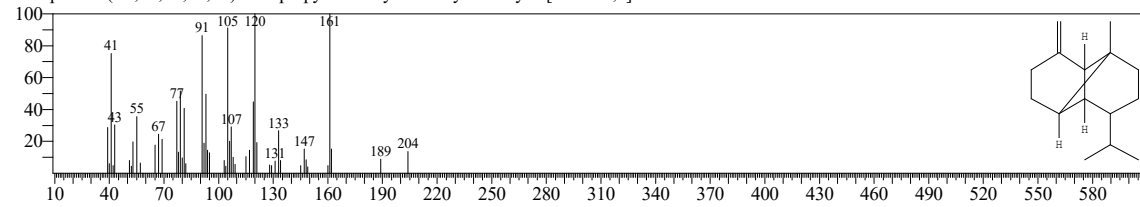

Hit#:10 Entry:75168 Library:NIST17.lib

SI:90 Formula:C15H24 CAS:23986-74-5 MolWeight:204 RetIndex:1515

CompName:Germacrene D

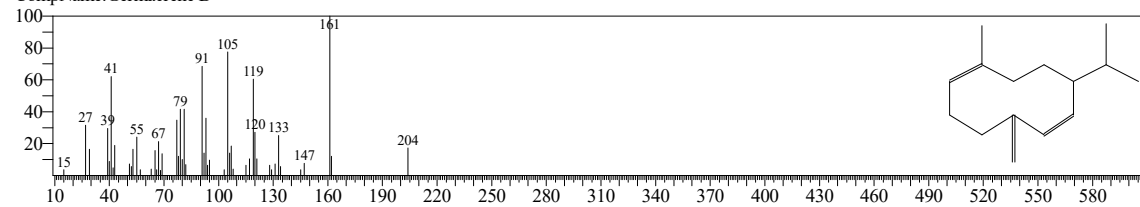

<< Target >>

Line#:30 R.Time:34.290(Scan#:6299) Retention Index:1515 MassPeaks:331

RawMode:Averaged 34.220-34.430(6285-6327) BasePeak:161.15(5747)

BG Mode:Calc. from Peak Group 1 - Event 1 Scan

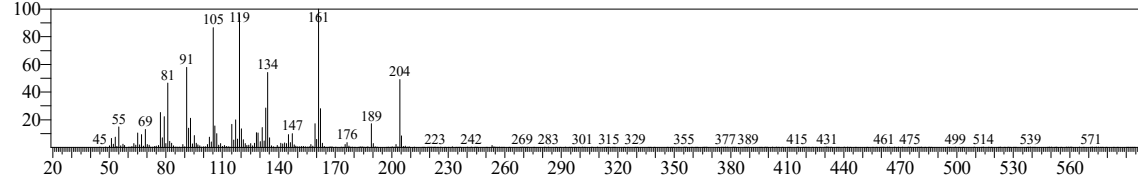

Hit#:1 Entry:838 Library:FFNSC 1.2.lib

SI:94 Formula:C15H24 CAS:483-76-1 MolWeight:204 RetIndex:1518

CompName:Cadinene <delta->, Naphthalene <1,2,3,5,6,8a-hexahydro-, 4,7-dimethyl-, 1-(1-methylethyl)->

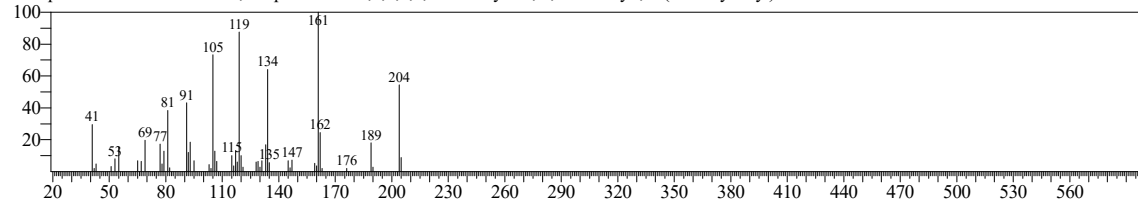

Hit#:2 Entry:203935 Library:W11N17MAIN1.lib

SI:92 Formula:C15H24 CAS:483-76-1 MolWeight:204 RetIndex:1469

CompName:delta-Cadinene

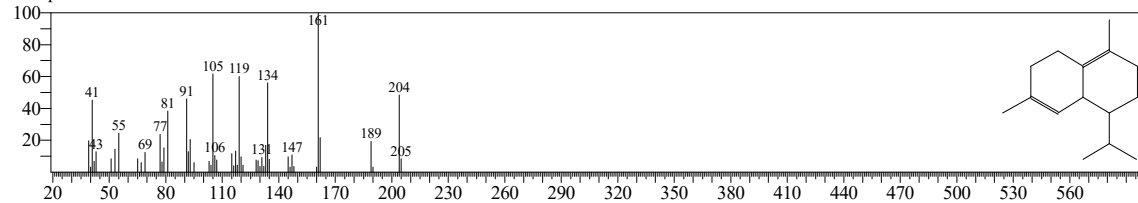

Hit#:3 Entry:75412 Library:NIST17.lib

SI:92 Formula:C15H24 CAS:483-76-1 MolWeight:204 RetIndex:1469

CompName:Naphthalene, 1,2,3,5,6,8a-hexahydro-4,7-dimethyl-1-(1-methylethyl)-, (1S-cis)-

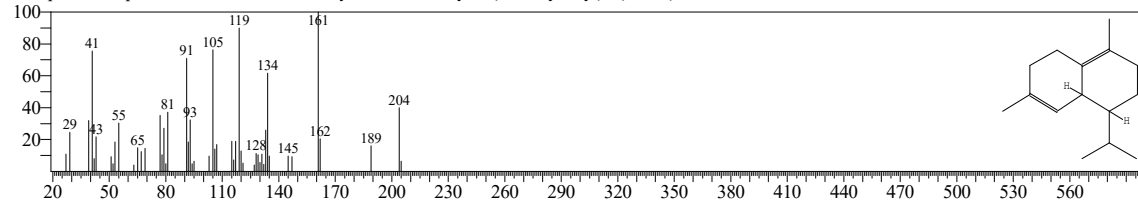

Hit#:4 Entry:203928 Library:W11N17MAIN1.lib

SI:92 Formula:C15H24 CAS:483-76-1 MolWeight:204 RetIndex:1469

CompName:Naphthalene, 1,2,3,5,6,8a-hexahydro-4,7-dimethyl-1-(1-methylethyl)-, (1S-cis)-

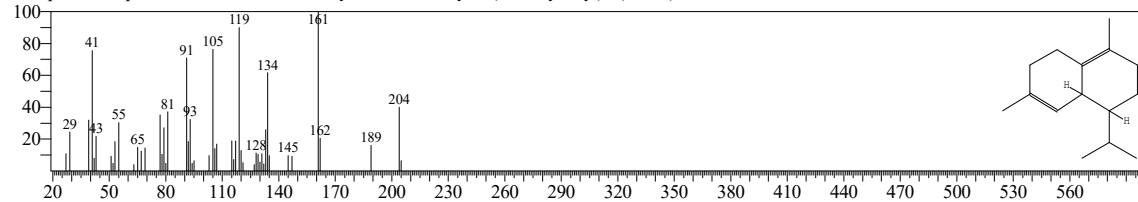



<< Target >>

Line#:30 R.Time:34.290(Scan#:6299) Retention Index:1515 MassPeaks:331

RawMode:Averaged 34.220-34.430(6285-6327) BasePeak:161.15(5747)

BG Mode:Calc. from Peak Group 1 - Event 1 Scan

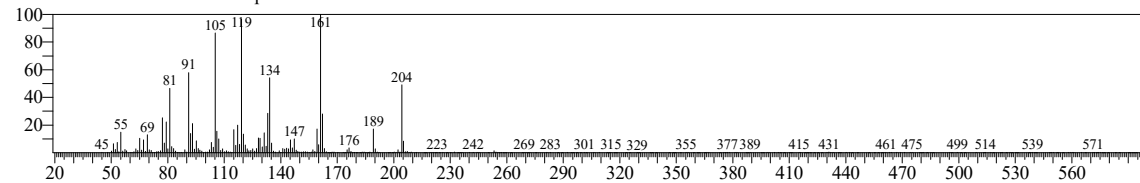

Hit#:5 Entry:75187 Library:NIST17.lib

SI:90 Formula:C15H24 CAS:16729-01-4 MolWeight:204 RetIndex:1469

CompName:1-Isopropyl-4,7-dimethyl-1,2,3,5,6,8a-hexahydronaphthalene

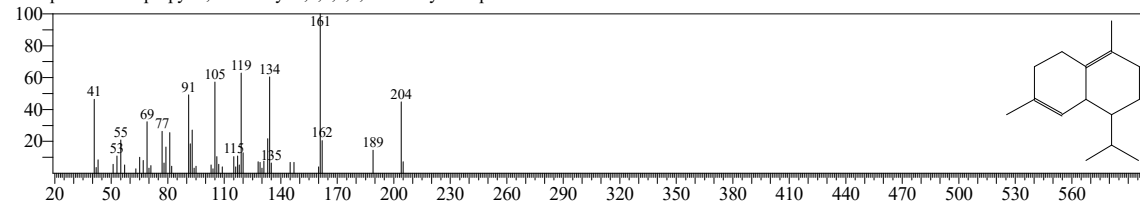

Hit#:6 Entry:203934 Library:W11N17MAIN1.lib

SI:90 Formula:C15H24 CAS:16729-01-4 MolWeight:204 RetIndex:1469

CompName:1-Isopropyl-4,7-dimethyl-1,2,3,5,6,8a-hexahydronaphthalene

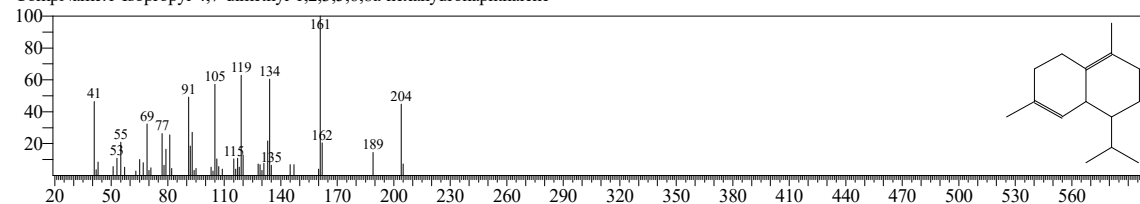

Hit#:7 Entry:204079 Library:W11N17MAIN1.lib

SI:88 Formula:C15H24 CAS:0-00-0 MolWeight:204 RetIndex:1440

CompName:cis-muurolo-3,5-diene

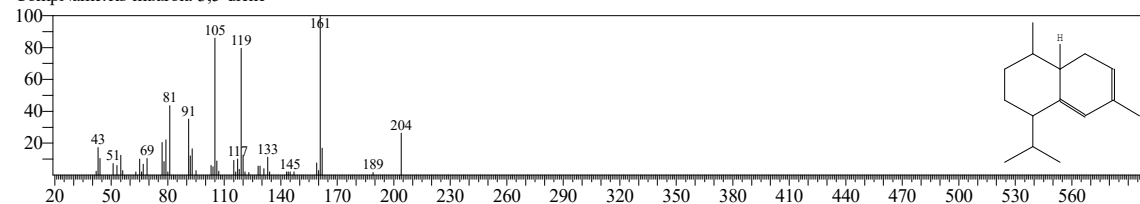

Hit#:8 Entry:75172 Library:NIST17.lib

SI:88 Formula:C15H24 CAS:0-00-0 MolWeight:204 RetIndex:1440

CompName:cis-muurolo-3,5-diene

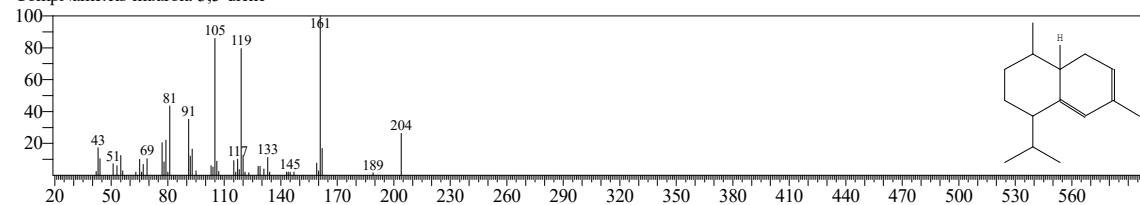

<< Target >>

Line#:30 R.Time:34.290(Scan#:6299) Retention Index:1515 MassPeaks:331

RawMode:Averaged 34.220-34.430(6285-6327) BasePeak:161.15(5747)

BG Mode:Calc. from Peak Group 1 - Event 1 Scan

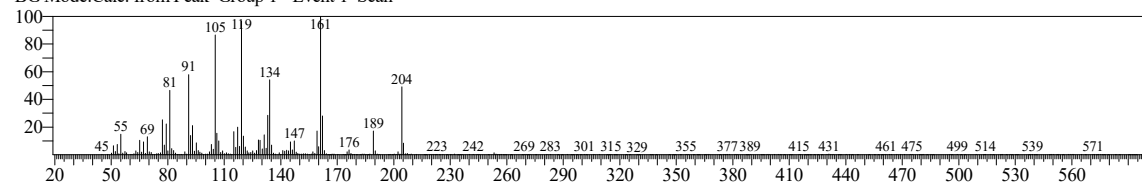

Hit#:9 Entry:204284 Library:W11N17MAIN1.lib

SI:87 Formula:C15H24 CAS:95910-36-4 MolWeight:204 RetIndex:1419

CompName:(-)-Isoledene

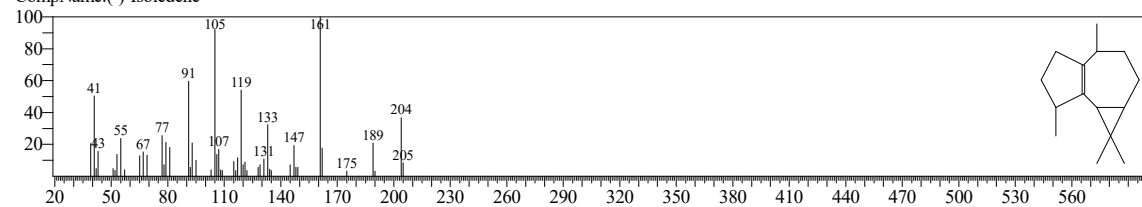

Hit#:10 Entry:204045 Library:W11N17MAIN1.lib

SI:87 Formula:C15H24 CAS:489-39-4 MolWeight:204 RetIndex:1386

CompName:1,1,7-Trimethyl-4-methylenedecahydro-1H-cyclopropa[c]azulene

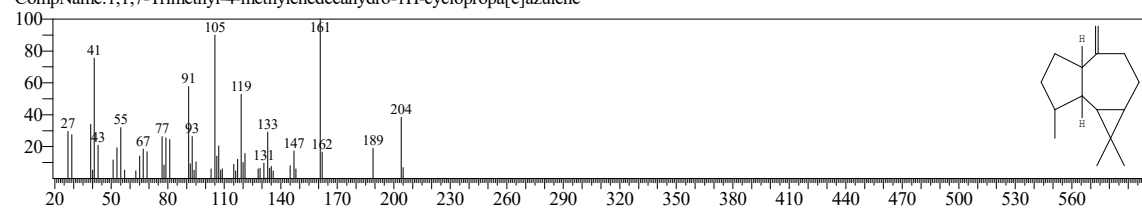

<< Target >>

Line#:31 R.Time:35.460(Scan#:6533) Retention Index:1545 MassPeaks:374

RawMode:Averaged 35.410-35.550(6523-6551) BasePeak:91.05(627)

BG Mode:Calc. from Peak Group 1 - Event 1 Scan

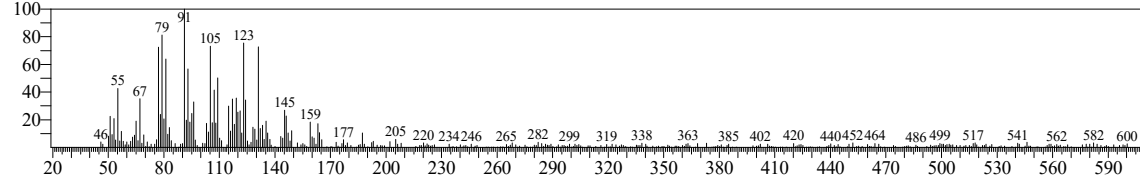

Hit#:1 Entry:91640 Library:NIST17.lib

SI:81 Formula:C15H24O CAS:81968-62-9 MolWeight:220 RetIndex:1699

CompName:(1R,7S,E)-7-Isopropyl-4,10-dimethylenecyclodec-5-enol

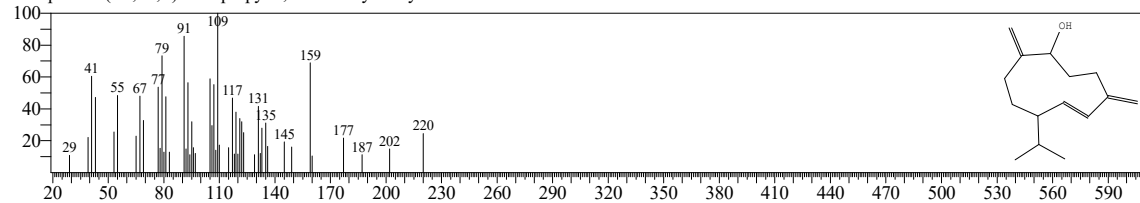

Hit#:2 Entry:257873 Library:W11N17MAIN1.lib

SI:81 Formula:C15H24O CAS:81968-62-9 MolWeight:220 RetIndex:1699

CompName:(1R,7S,E)-7-Isopropyl-4,10-dimethylenecyclodec-5-enol

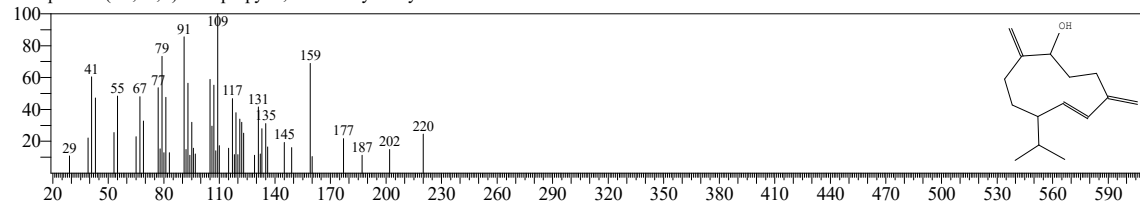

Hit#:3 Entry:228618 Library:NIST17.lib

SI:79 Formula:C20H30O5 CAS:5508-58-7 MolWeight:350 RetIndex:2944

CompName:Andrographolide

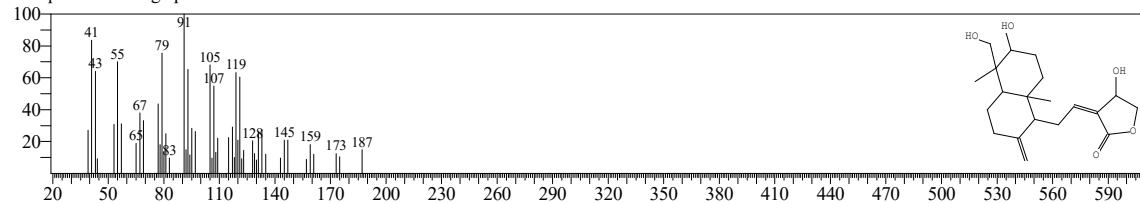

Hit#:4 Entry:153172 Library:W11N17MAIN2.lib

SI:79 Formula:C20H30O5 CAS:5508-58-7 MolWeight:350 RetIndex:2944

CompName:Andrographolide

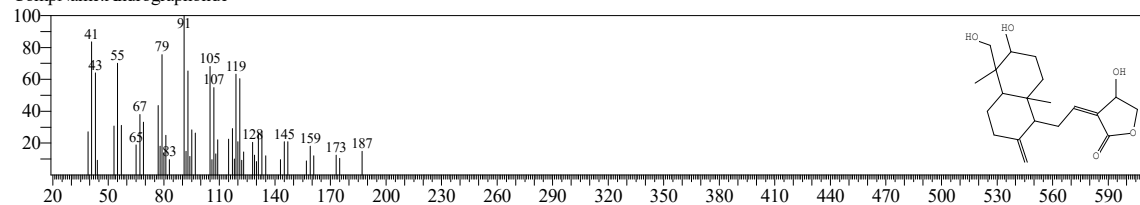

<< Target >>

Line#:31 R.Time:35.460(Scan#:6533) Retention Index:1545 MassPeaks:374

RawMode:Averaged 35.410-35.550(6523-6551) BasePeak:91.05(627)

BG Mode:Calc. from Peak Group 1 - Event 1 Scan

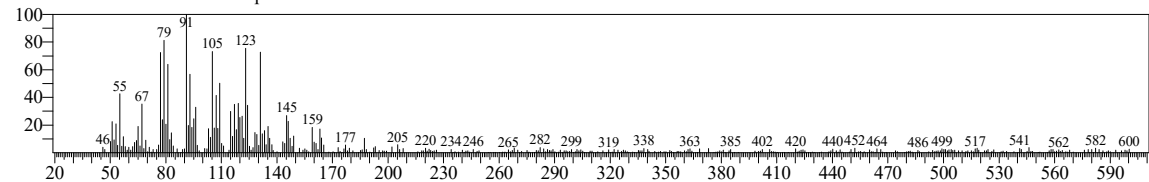

Hit#:5 Entry:89515 Library:NIST17.lib

SI:79 Formula:C15H22O CAS:470-41-7 MolWeight:218 RetIndex:1604

CompName:(1aR,4aS,8aS)-4a,8,8-Trimethyl-1,1a,4,4a,5,6,7,8-octahydrocyclopropa[d]naphthalene-2-carbaldehyde

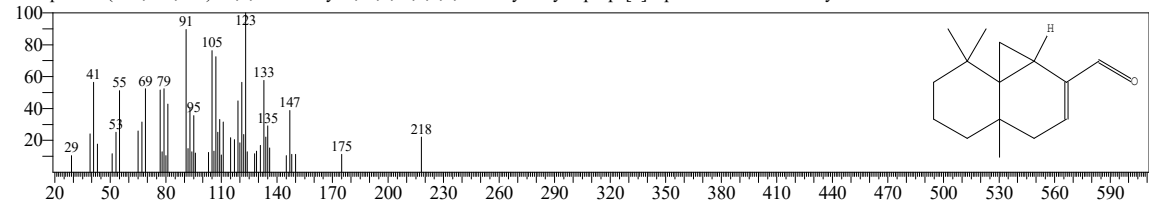

Hit#:6 Entry:250229 Library:W11N17MAIN1.lib

SI:79 Formula:C15H22O CAS:470-41-7 MolWeight:218 RetIndex:1604

CompName:(1aR,4aS,8aS)-4a,8,8-Trimethyl-1,1a,4,4a,5,6,7,8-octahydrocyclopropa[d]naphthalene-2-carbaldehyde

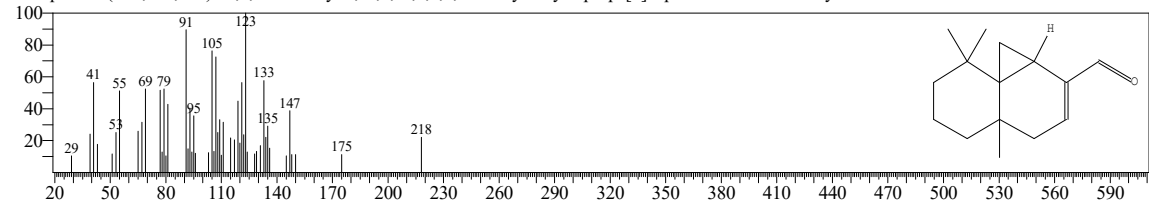

Hit#:7 Entry:118557 Library:NIST17.lib

SI:79 Formula:C15H18O3 CAS:130838-06-1 MolWeight:246 RetIndex:1892

CompName:Spirafolide

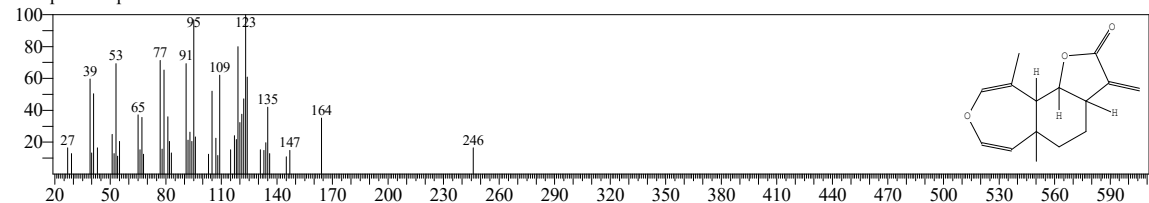

Hit#:8 Entry:347621 Library:W11N17MAIN1.lib

SI:79 Formula:C15H18O3 CAS:130838-06-1 MolWeight:246 RetIndex:1892

CompName:Spirafolide

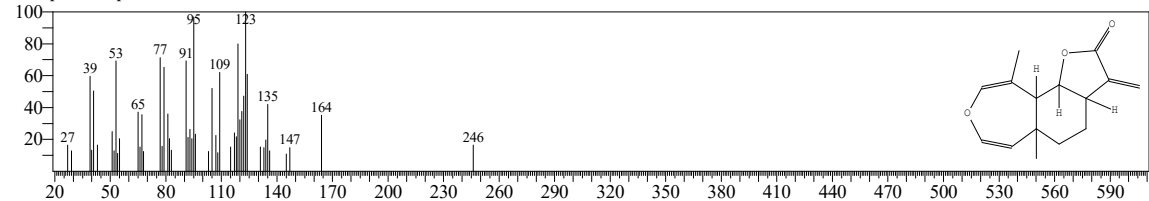

<< Target >>

Line#:31 R.Time:35.460(Scan#:6533) Retention Index:1545 MassPeaks:374

RawMode:Averaged 35.410-35.550(6523-6551) BasePeak:91.05(627)

BG Mode:Calc. from Peak Group 1 - Event 1 Scan

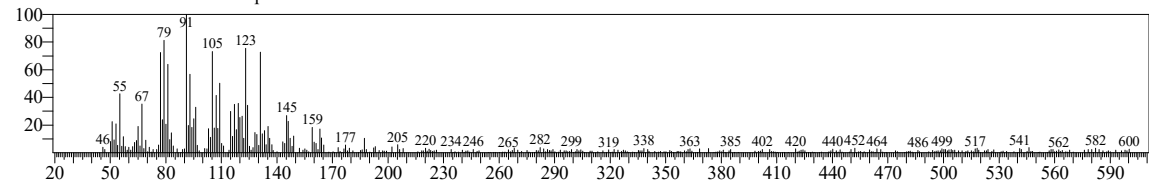

Hit#:9 Entry:257766 Library:W1N17MAIN1.lib

SI:78 Formula:C15H24O CAS:65018-15-7 MolWeight:220 RetIndex:1716

CompName:2-((2R,4aR,8aR)-4a,8-Dimethyl-1,2,3,4,4a,5,6,8a-octahydronaphthalen-2-yl)prop-2-en-1-ol

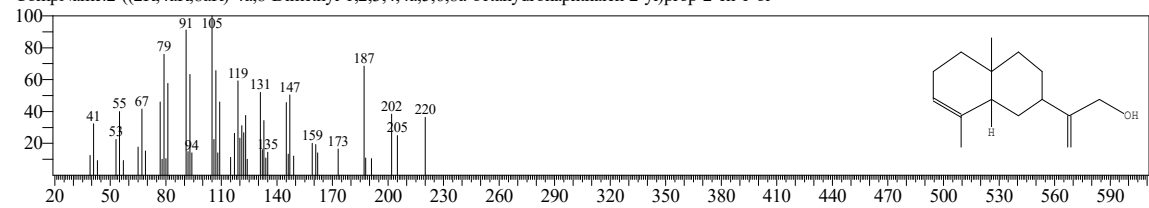

Hit#:10 Entry:91623 Library:NIST17.lib

SI:78 Formula:C15H24O CAS:65018-15-7 MolWeight:220 RetIndex:1716

CompName:2-((2R,4aR,8aR)-4a,8-Dimethyl-1,2,3,4,4a,5,6,8a-octahydronaphthalen-2-yl)prop-2-en-1-ol

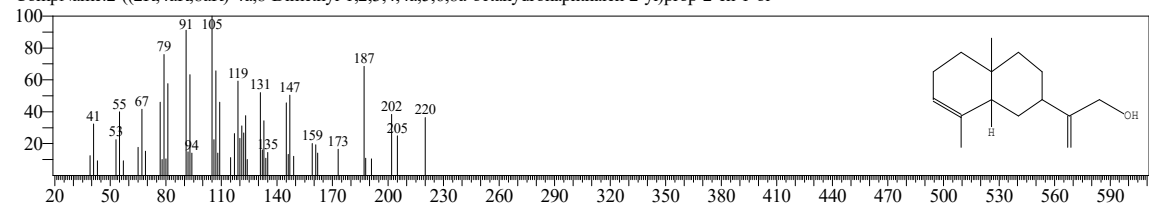

<< Target >>

Line#:32 R.Time:35.960(Scan#:6633) Retention Index:1558 MassPeaks:327

RawMode:Averaged 35.905-36.045(6622-6650) BasePeak:81.05(981)

BG Mode:Calc. from Peak Group 1 - Event 1 Scan

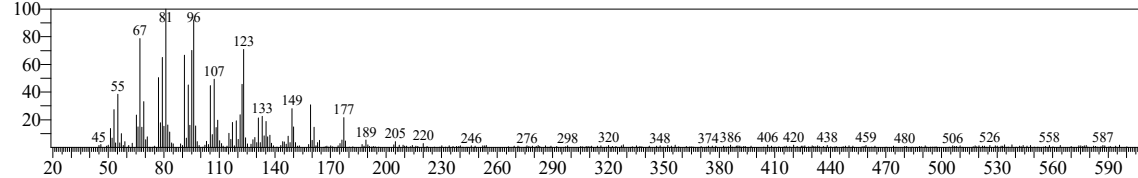

Hit#:1 Entry:257312 Library:W11N17MAIN1.lib

SI:90 Formula:C15H24O CAS:88395-47-5 MolWeight:220 RetIndex:1448

CompName:(1S,3aR,4R,8R,8aS)-1-Isopropyl-3a-methyl-7-methylenedecaahydro-4,8-epoxyazulene

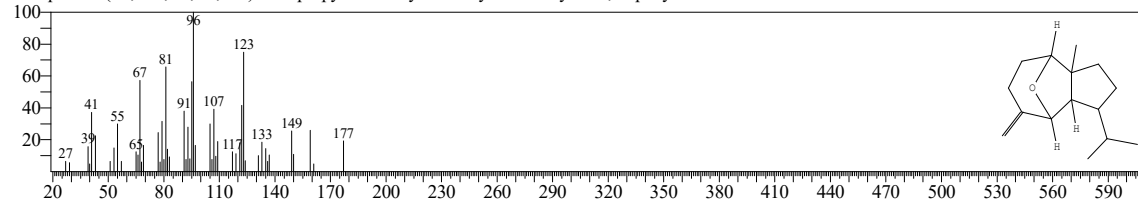

Hit#:2 Entry:91620 Library:NIST17.lib

SI:90 Formula:C15H24O CAS:88395-47-5 MolWeight:220 RetIndex:1448

CompName:(1S,3aR,4R,8R,8aS)-1-Isopropyl-3a-methyl-7-methylenedecaahydro-4,8-epoxyazulene

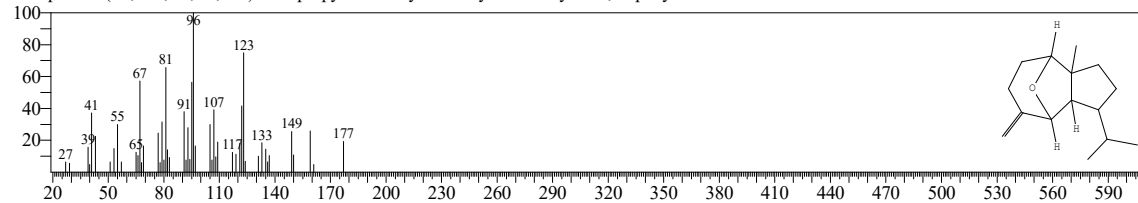

Hit#:3 Entry:257313 Library:W11N17MAIN1.lib

SI:89 Formula:C15H24O CAS:0-00-0 MolWeight:220 RetIndex:1448

CompName:1,5-Epoxysalvial-4(14)-ene

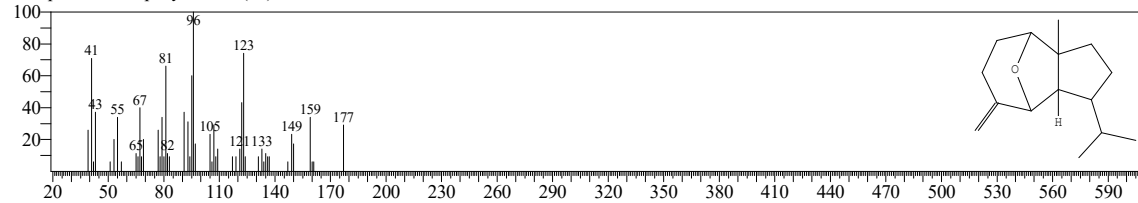

Hit#:4 Entry:143505 Library:W11N17MAIN2.lib

SI:84 Formula:C22H34O3 CAS:55902-84-6 MolWeight:346 RetIndex:2338

CompName:Kauran-18-al, 17-(acetyloxy)-, (4.beta.)-

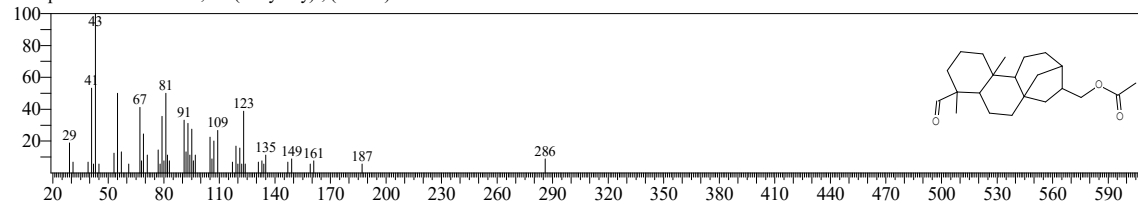

<< Target >>

Line#:32 R.Time:35.960(Scan#:6633) Retention Index:1558 MassPeaks:327

RawMode:Averaged 35.905-36.045(6622-6650) BasePeak:81.05(981)

BG Mode:Calc. from Peak Group 1 - Event 1 Scan

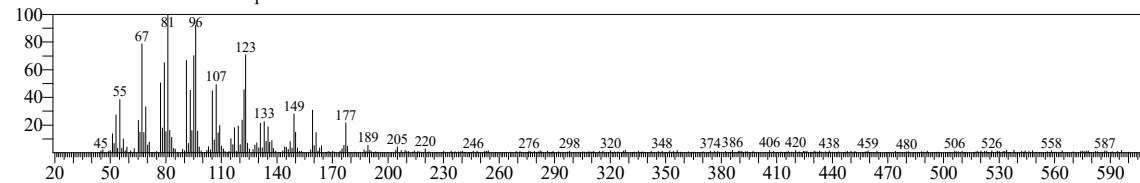

Hit#:5 Entry:225418 Library:NIST17.lib

SI:84 Formula:C22H34O3 CAS:55902-84-6 MolWeight:346 RetIndex:2338

CompName:Kauran-18-al, 17-(acetyloxy)-, (4.beta.)-

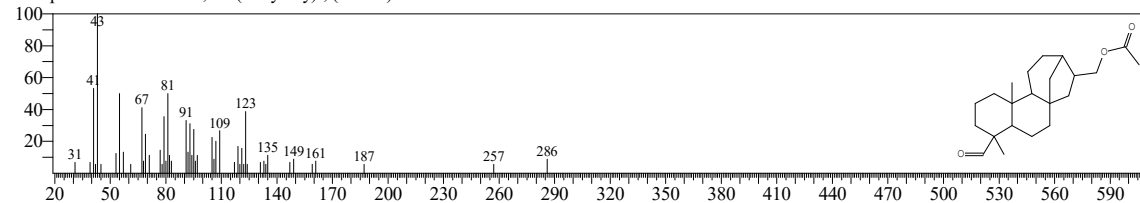

Hit#:6 Entry:143506 Library:W11N17MAIN2.lib

SI:84 Formula:C22H34O3 CAS:55902-84-6 MolWeight:346 RetIndex:2338

CompName:Kauran-18-al, 17-(acetyloxy)-, (4.beta.)-

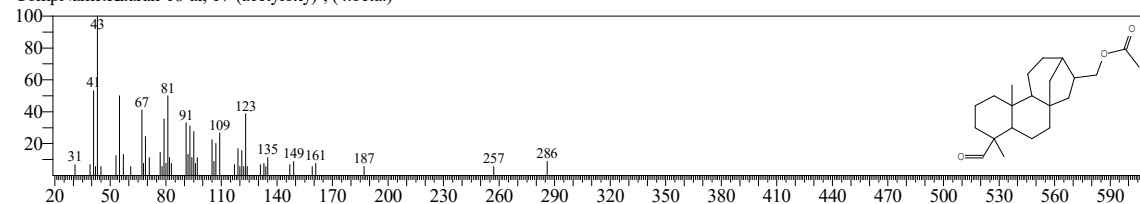

Hit#:7 Entry:91551 Library:NIST17.lib

SI:83 Formula:C15H24O CAS:0-00-0 MolWeight:220 RetIndex:1281

CompName:Isoaromadendrene epoxide

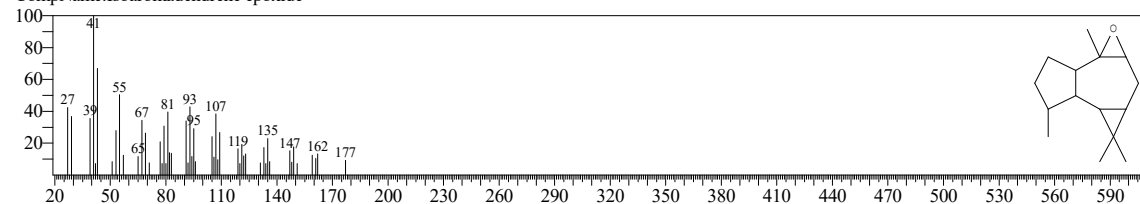

Hit#:8 Entry:257480 Library:W11N17MAIN1.lib

SI:83 Formula:C15H24O CAS:0-00-0 MolWeight:220 RetIndex:1281

CompName:Isoaromadendrene epoxide

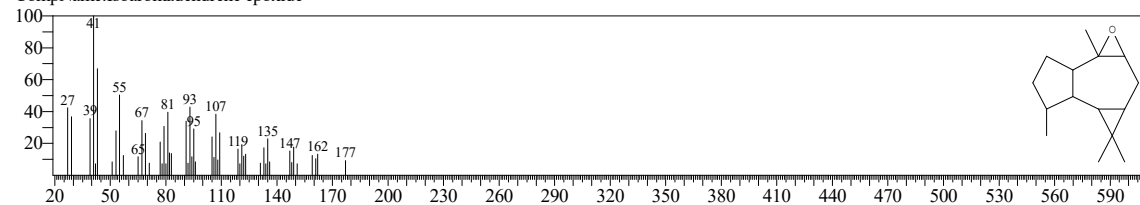

<< Target >>

Line#:32 R.Time:35.960(Scan#:6633) Retention Index:1558 MassPeaks:327

RawMode:Averaged 35.905-36.045(6622-6650) BasePeak:81.05(981)

BG Mode:Calc. from Peak Group 1 - Event 1 Scan

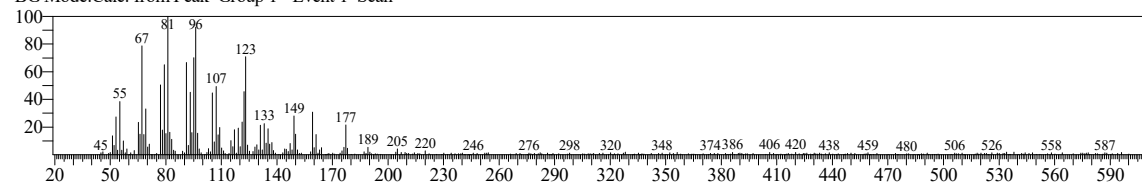

Hit#:9 Entry:257479 Library:W11N17MAIN1.lib

SI:83 Formula:C15H24O CAS:0-00-0 MolWeight:220 RetIndex:1281

CompName:Isoaromadendrene epoxide

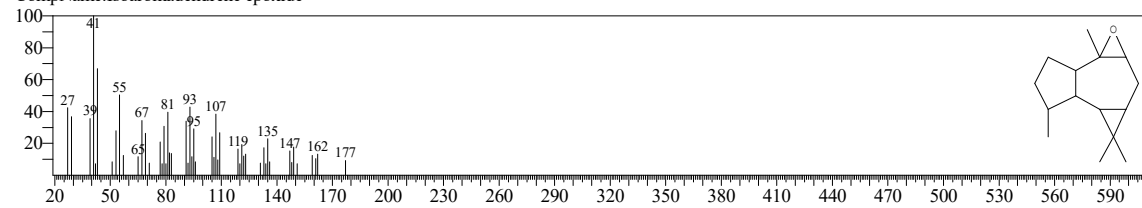

Hit#:10 Entry:6239 Library:W11N17MAIN2.lib

SI:82 Formula:C20H30O2 CAS:104263-85-6 MolWeight:302 RetIndex:2296

CompName:(E)-Labda-8(17),12-diene-15,16-dial

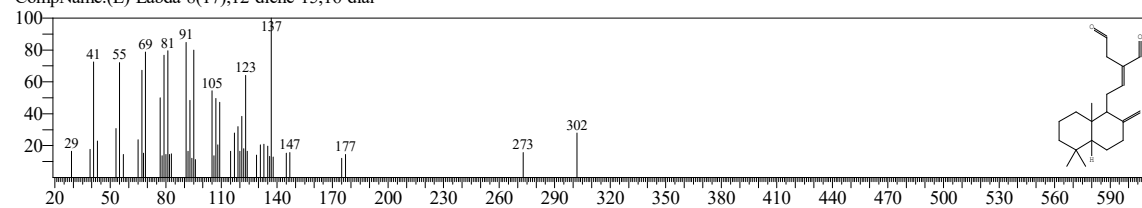



<< Target >>

Line#:33 R.Time:36.375(Scan#:6716) Retention Index:1568 MassPeaks:306

RawMode:Averaged 36.240-36.460(6689-6733) BasePeak:81.10(5549)

BG Mode:Calc. from Peak Group 1 - Event 1 Scan

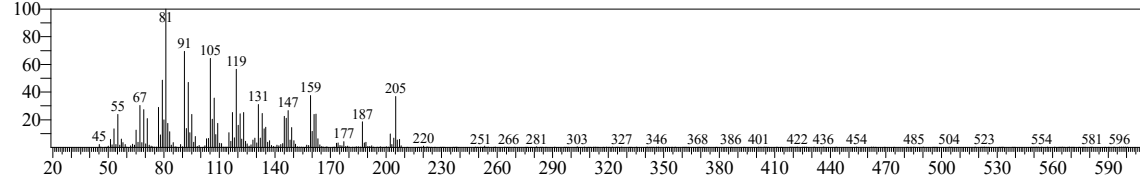

Hit#:1 Entry:903 Library:FFNSC 1.2.lib

SI:87 Formula:C15 H24 O CAS:6750-60-3 MolWeight:220 RetIndex:1576

CompName:Spathulenol; Cycloprop[e]azulen-7-ol <decahydro-, 1,1,7-trimethyl-, 4-methylene-, 1H->

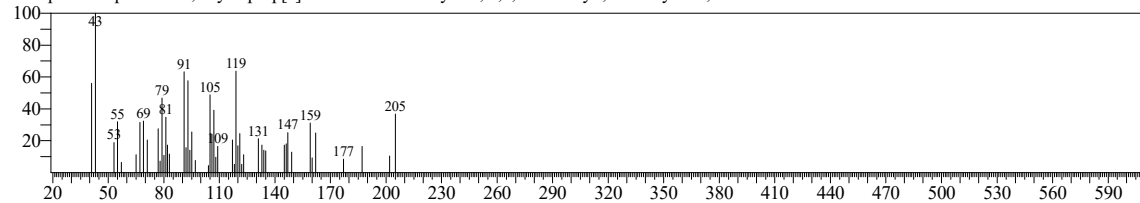

Hit#:2 Entry:257448 Library:W11N17MAIN1.lib

SI:86 Formula:C15H24O CAS:6750-60-3 MolWeight:220 RetIndex:1536

CompName:1H-Cycloprop[e]azulen-7-ol, decahydro-1,1,7-trimethyl-4-methylene-, [1ar-(1a.alpha.,4a.alpha.,7.beta.,7a.beta.,7b.alpha.)]-

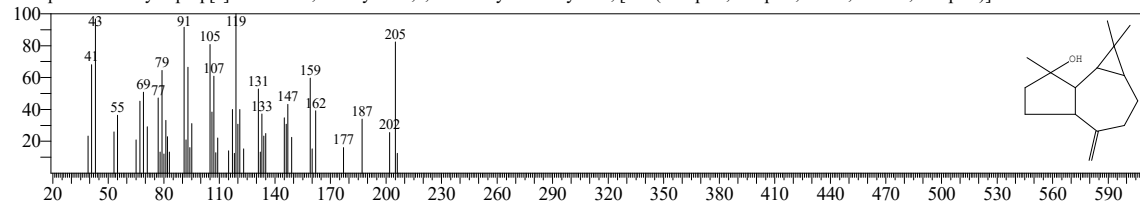

Hit#:3 Entry:91764 Library:NIST17.lib

SI:86 Formula:C15H24O CAS:6750-60-3 MolWeight:220 RetIndex:1536

CompName:1H-Cycloprop[e]azulen-7-ol, decahydro-1,1,7-trimethyl-4-methylene-, [1ar-(1a.alpha.,4a.alpha.,7.beta.,7a.beta.,7b.alpha.)]-

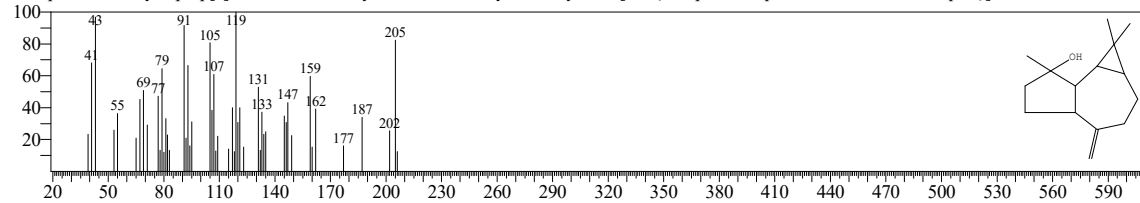

Hit#:4 Entry:91745 Library:NIST17.lib

SI:85 Formula:C15H24O CAS:6750-60-3 MolWeight:220 RetIndex:1536

CompName:1H-Cycloprop[e]azulen-7-ol, decahydro-1,1,7-trimethyl-4-methylene-, [1ar-(1a.alpha.,4a.alpha.,7.beta.,7a.beta.,7b.alpha.)]-

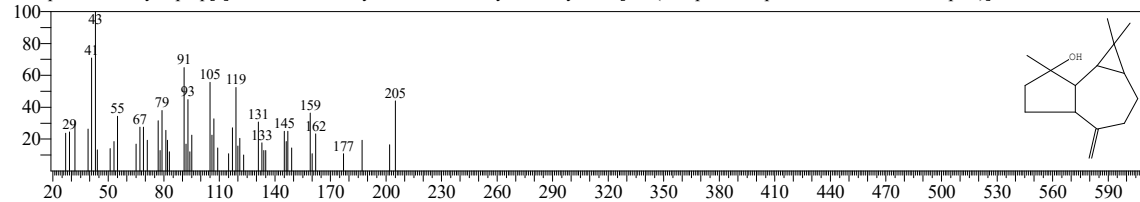

<< Target >>

Line#:33 R.Time:36.375(Scan#:6716) Retention Index:1568 MassPeaks:306

RawMode:Averaged 36.240-36.460(6689-6733) BasePeak:81.10(5549)

BG Mode:Calc. from Peak Group 1 - Event 1 Scan

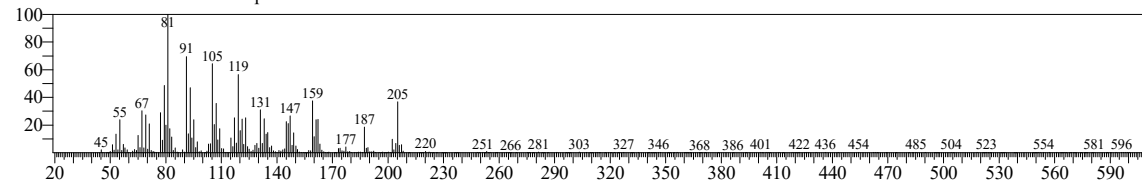

Hit#:5 Entry:257452 Library:W11N17MAIN1.lib

SI:85 Formula:C15H24O CAS:6750-60-3 MolWeight:220 RetIndex:1536

CompName:1H-Cycloprop[e]azulen-7-ol, decahydro-1,1,7-trimethyl-4-methylene-, [1ar-(1a.alpha.,4a.alpha.,7.beta.,7a.beta.,7b.alpha.)]-

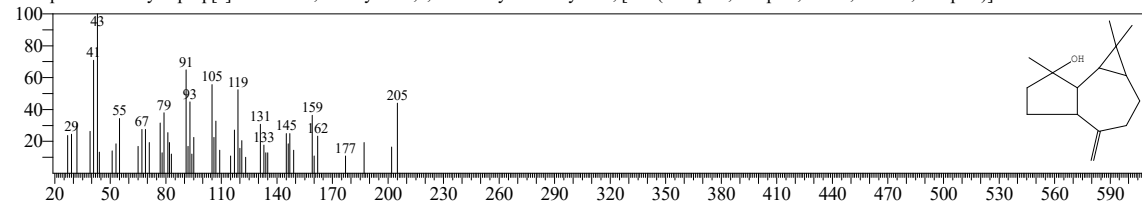

Hit#:6 Entry:257453 Library:W11N17MAIN1.lib

SI:85 Formula:C15H24O CAS:77171-55-2 MolWeight:220 RetIndex:1536

CompName:(-)-Spathulenol

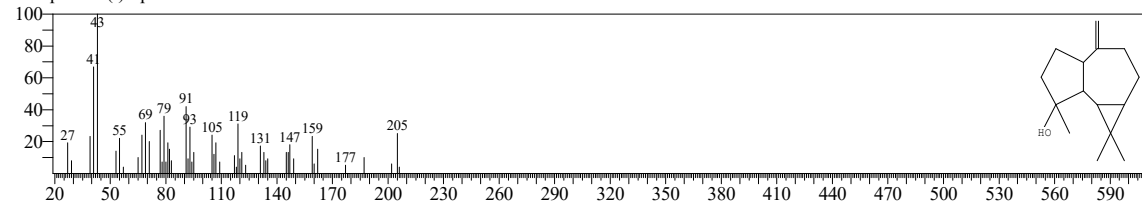

Hit#:7 Entry:91576 Library:NIST17.lib

SI:83 Formula:C15H24O CAS:6750-60-3 MolWeight:220 RetIndex:1536

CompName:1H-Cycloprop[e]azulen-7-ol, decahydro-1,1,7-trimethyl-4-methylene-, [1ar-(1a.alpha.,4a.alpha.,7.beta.,7a.beta.,7b.alpha.)]-

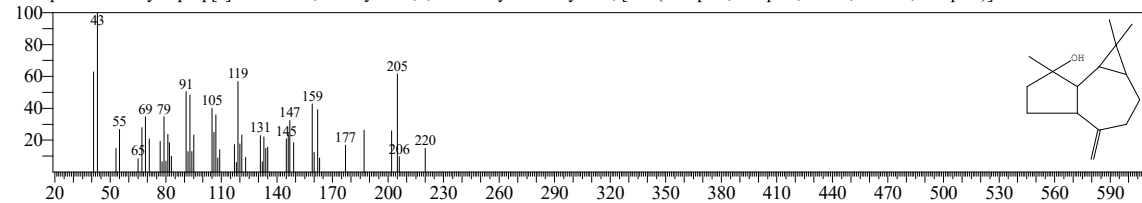

Hit#:8 Entry:257451 Library:W11N17MAIN1.lib

SI:83 Formula:C15H24O CAS:6750-60-3 MolWeight:220 RetIndex:1536

CompName:1H-Cycloprop[e]azulen-7-ol, decahydro-1,1,7-trimethyl-4-methylene-, [1ar-(1a.alpha.,4a.alpha.,7.beta.,7a.beta.,7b.alpha.)]-

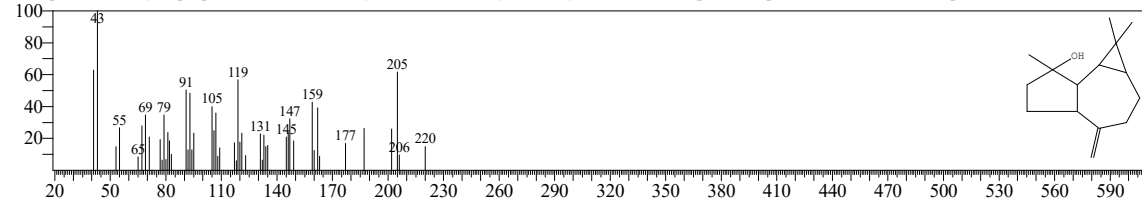

<< Target >>

Line#:33 R.Time:36.375(Scan#:6716) Retention Index:1568 MassPeaks:306

RawMode:Averaged 36.240-36.460(6689-6733) BasePeak:81.10(5549)

BG Mode:Calc. from Peak Group 1 - Event 1 Scan

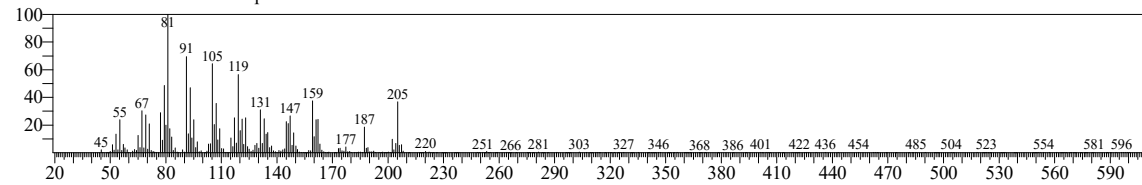

Hit#:9 Entry:257450 Library:W11N17MAIN1.lib

SI:83 Formula:C15H24O CAS:6750-60-3 MolWeight:220 RetIndex:1536

CompName:(-)-Spathulenol

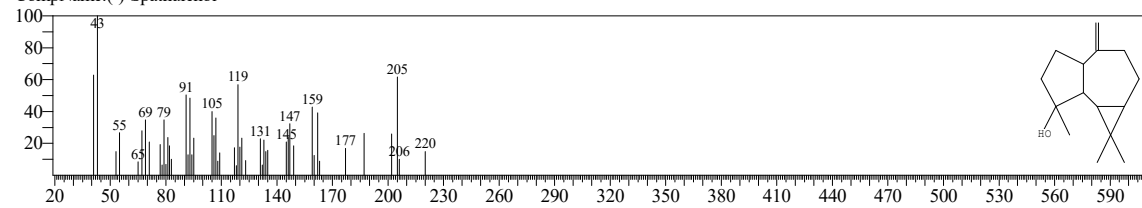

Hit#:10 Entry:257440 Library:W11N17MAIN1.lib

SI:83 Formula:C15H24O CAS:0-00-0 MolWeight:220 RetIndex:1569

CompName:Isospathulenol

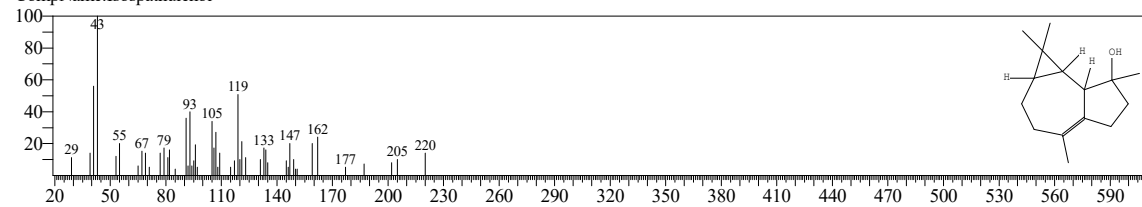

<< Target >>

Line#:34 R.Time:36.490(Scan#:6739) Retention Index:1571 MassPeaks:284

RawMode:Averaged 36.460-36.535(6733-6748) BasePeak:93.10(409)

BG Mode:Calc. from Peak Group 1 - Event 1 Scan

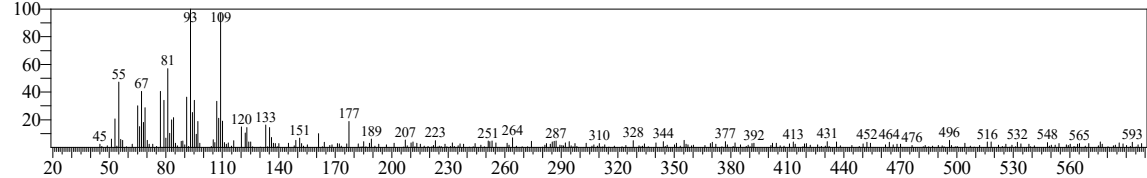

Hit#:1 Entry:42839 Library:W11N17MAIN1.lib

SI:79 Formula:C9H14O CAS:6975-94-6 MolWeight:138 RetIndex:1073

CompName:3,5-Dimethylcyclohex-1-ene-4-carboxaldehyde

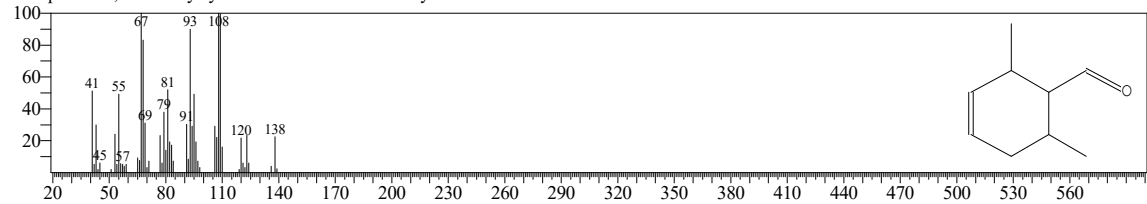

Hit#:2 Entry:19344 Library:NIST17.lib

SI:79 Formula:C9H14O CAS:6975-94-6 MolWeight:138 RetIndex:1073

CompName:3,5-Dimethylcyclohex-1-ene-4-carboxaldehyde

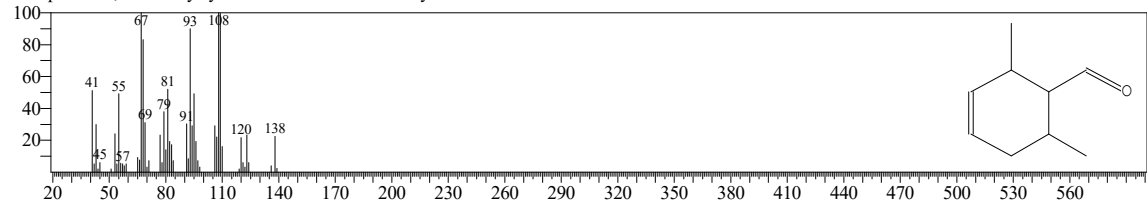

Hit#:3 Entry:94043 Library:NIST17.lib

SI:78 Formula:C15H26O CAS:1139-17-9 MolWeight:222 RetIndex:1635

CompName:Isolongifolol

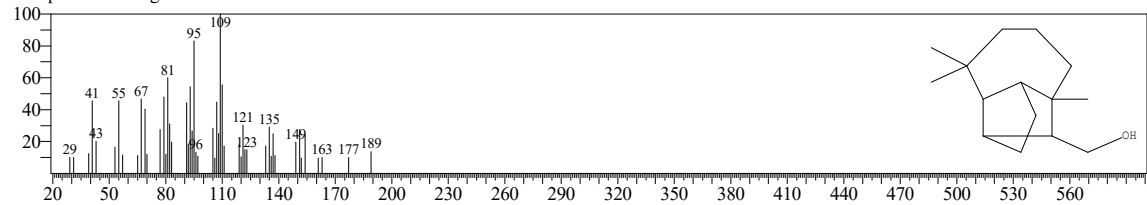

Hit#:4 Entry:265909 Library:W11N17MAIN1.lib

SI:78 Formula:C15H26O CAS:1139-17-9 MolWeight:222 RetIndex:1635

CompName:Isolongifolol

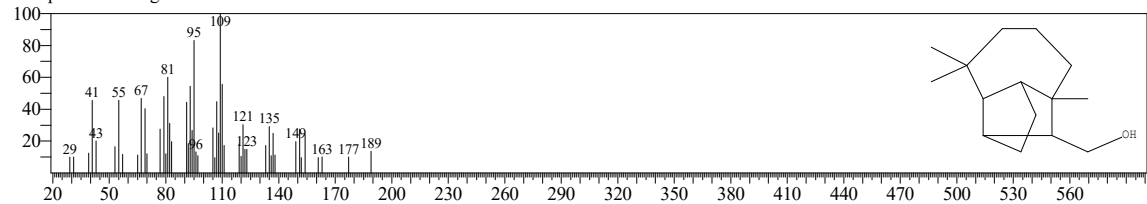

<< Target >>

Line#:34 R.Time:36.490(Scan#:6739) Retention Index:1571 MassPeaks:284

RawMode:Averaged 36.460-36.535(6733-6748) BasePeak:93.10(409)

BG Mode:Calc. from Peak Group 1 - Event 1 Scan

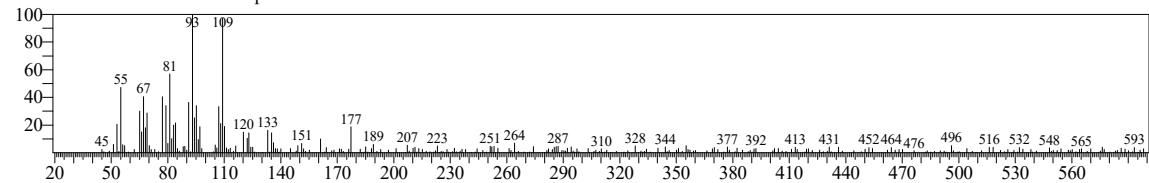

Hit#:5 Entry:145 Library:FFNSC 1.2.lib

SI:77 Formula:C15 H24 O CAS:1139-30-6 MolWeight:220 RetIndex:1587

CompName:Caryophyllene oxide; Dodecane <5-oxatricyclo(8.2.0.04,6), 4,12,12-trimethyl-, 9-methylene->

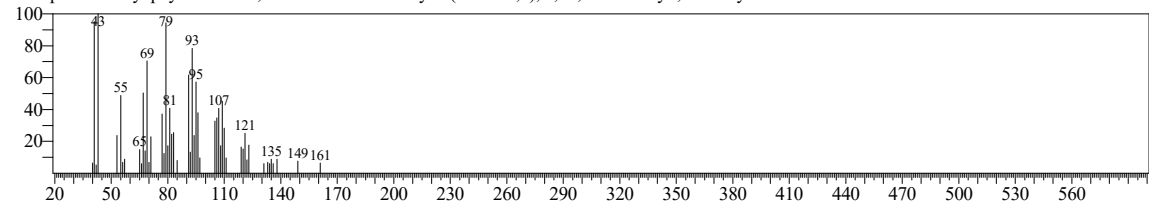

Hit#:6 Entry:971 Library:FFNSC 1.2.lib

SI:77 Formula:C10 H16 O CAS:473-67-6 MolWeight:152 RetIndex:1146

CompName:Verbenol; Bicyclo-[3.1.1]-hept-3-en-2-ol <4,6,6-trimethyl->

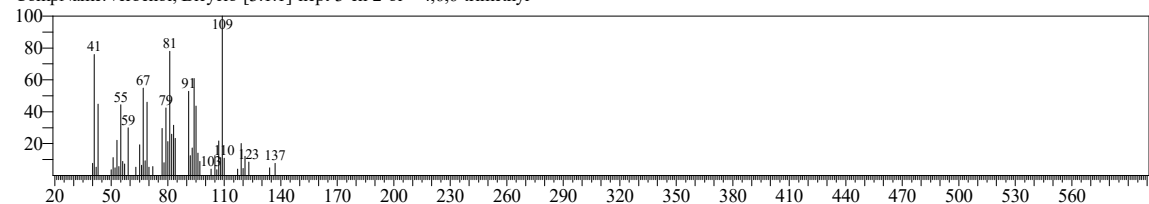

Hit#:7 Entry:257821 Library:W11N17MAIN1.lib

SI:77 Formula:C15H24O CAS:1139-30-6 MolWeight:220 RetIndex:1507

CompName:Caryophyllene oxide

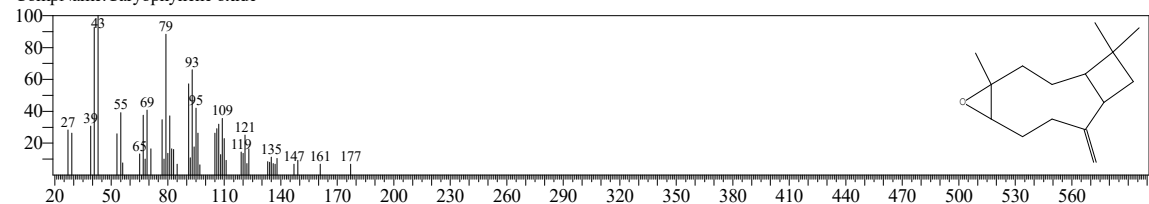

Hit#:8 Entry:91570 Library:NIST17.lib

SI:77 Formula:C15H24O CAS:1139-30-6 MolWeight:220 RetIndex:1507

CompName:Caryophyllene oxide

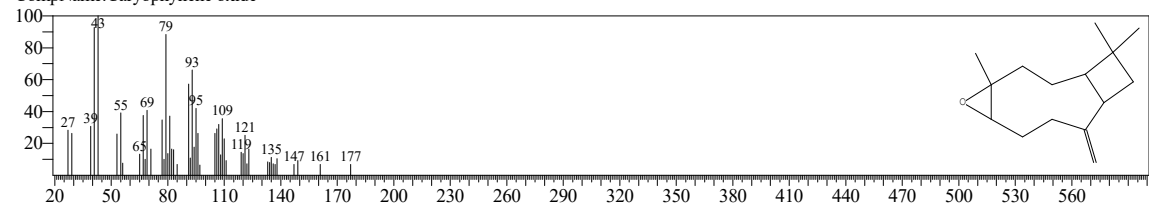

<< Target >>

Line#:34 R.Time:36.490(Scan#:6739) Retention Index:1571 MassPeaks:284

RawMode:Averaged 36.460-36.535(6733-6748) BasePeak:93.10(409)

BG Mode:Calc. from Peak Group 1 - Event 1 Scan

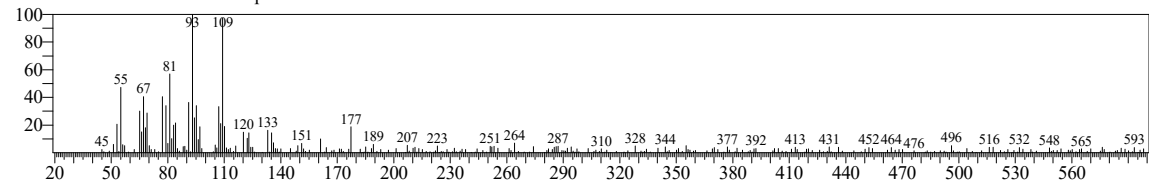

Hit#:9 Entry:91810 Library:NIST17.lib

SI:77 Formula:C16H28 CAS:0-00-0 MolWeight:220 RetIndex:1637

CompName:Z-3-Hexadecen-7-yne

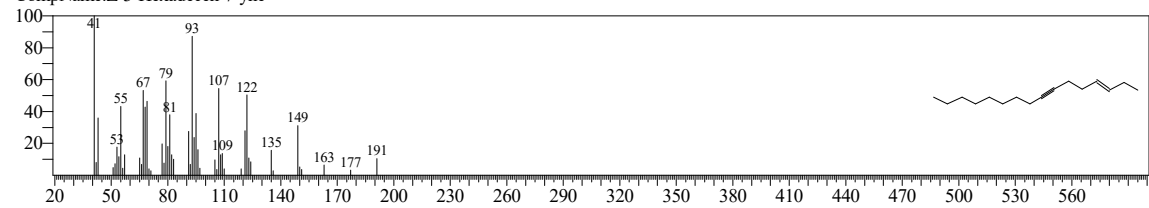

Hit#:10 Entry:258364 Library:W11N17MAIN1.lib

SI:77 Formula:C16H28 CAS:0-00-0 MolWeight:220 RetIndex:1637

CompName:Z-3-Hexadecen-7-yne

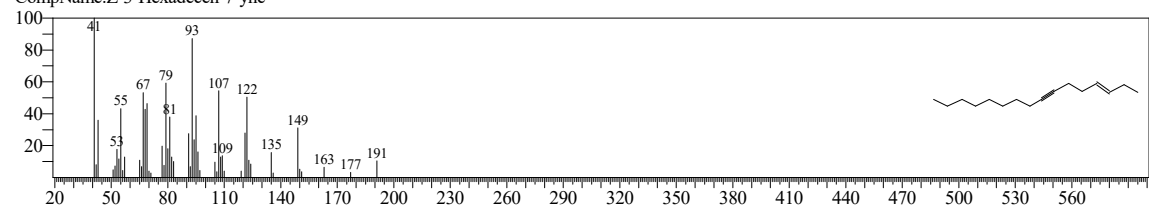

<< Target >>

Line#:35 R.Time:36.590(Scan#:6759) Retention Index:1574 MassPeaks:340

RawMode:Averaged 36.535-36.715(6748-6784) BasePeak:79.05(1606)

BG Mode:Calc. from Peak Group 1 - Event 1 Scan

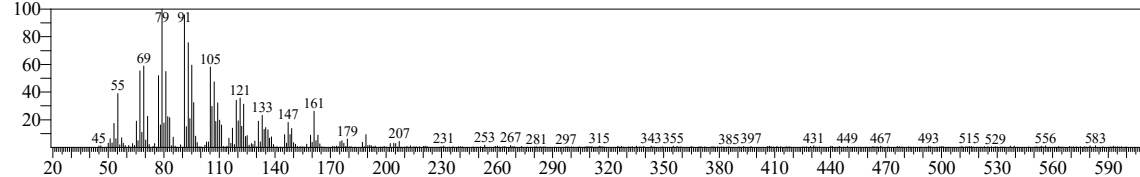

Hit#:1 Entry:257825 Library:W11N17MAIN1.lib

SI:91 Formula:C15H24O CAS:1139-30-6 MolWeight:220 RetIndex:1507

CompName:5-Oxatricyclo[8.2.0.0.4,6]dodecane, 4,12,12-trimethyl-9-methylene-, (1R,4R,6R,10S)-

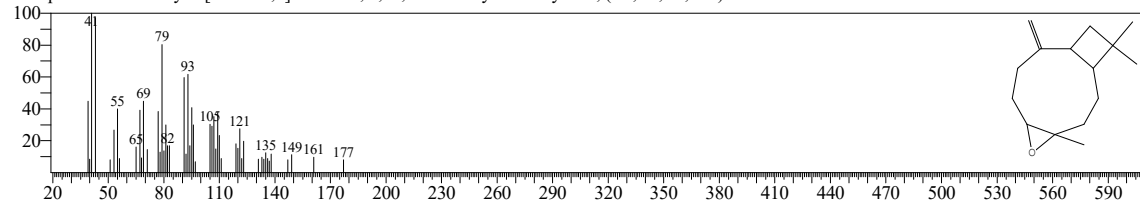

Hit#:2 Entry:257824 Library:W11N17MAIN1.lib

SI:91 Formula:C15H24O CAS:1139-30-6 MolWeight:220 RetIndex:1507

CompName:5-Oxatricyclo[8.2.0.0.4,6]dodecane, 4,12,12-trimethyl-9-methylene-, (1R,4R,6R,10S)-

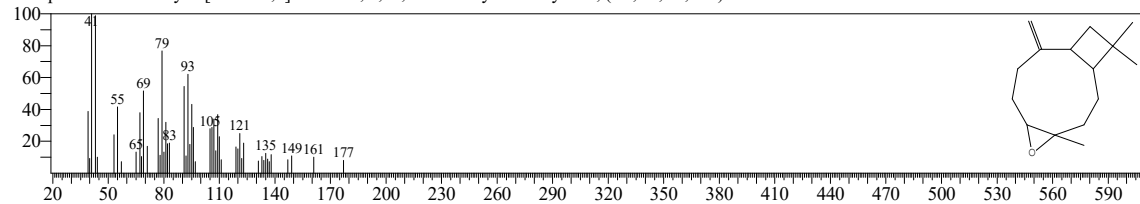

Hit#:3 Entry:145 Library:FFNSC 1.2.lib

SI:89 Formula:C15 H24 O CAS:1139-30-6 MolWeight:220 RetIndex:1587

CompName:Caryophyllene oxide; Dodecane <5-oxatricyclo(8.2.0.0.4,6), 4,12,12-trimethyl-, 9-methylene->

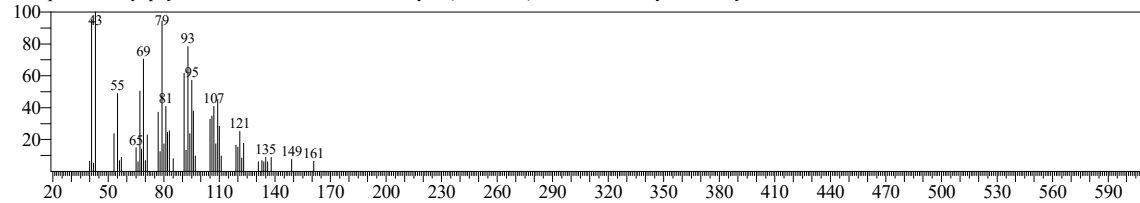

Hit#:4 Entry:91570 Library:NIST17.lib

SI:89 Formula:C15H24O CAS:1139-30-6 MolWeight:220 RetIndex:1507

CompName:Caryophyllene oxide

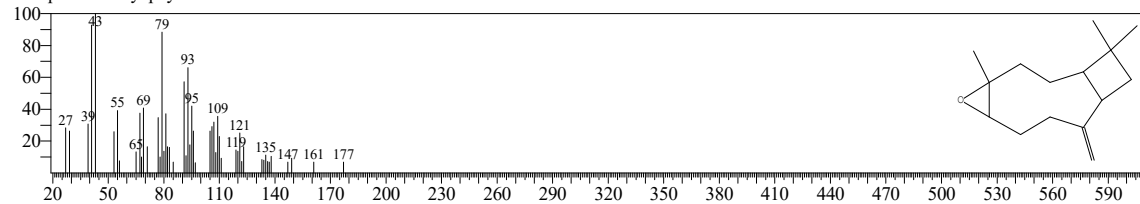

<< Target >>

Line#:35 R.Time:36.590(Scan#:6759) Retention Index:1574 MassPeaks:340

RawMode:Averaged 36.535-36.715(6748-6784) BasePeak:79.05(1606)

BG Mode:Calc. from Peak Group 1 - Event 1 Scan

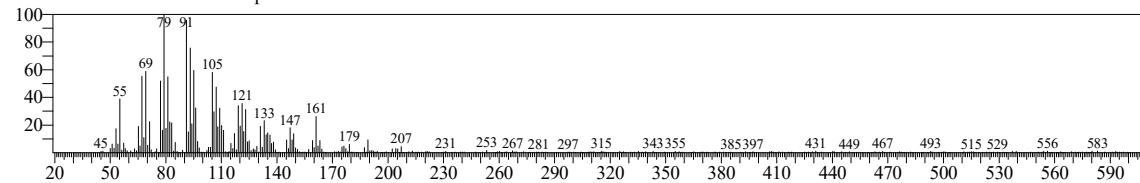

Hit#:5 Entry:257821 Library:W11N17MAIN1.lib

SI:89 Formula:C15H24O CAS:1139-30-6 MolWeight:220 RetIndex:1507

CompName:Caryophyllene oxide

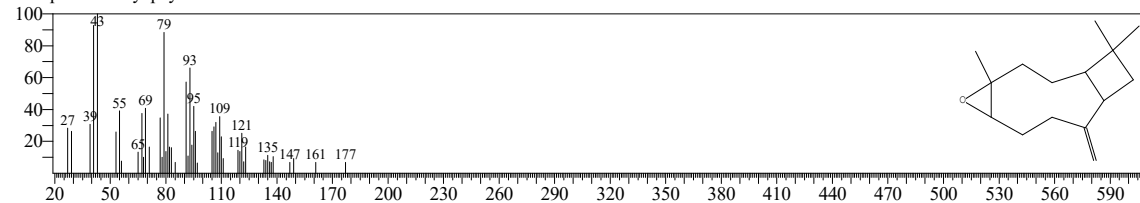

Hit#:6 Entry:257823 Library:W11N17MAIN1.lib

SI:88 Formula:C15H24O CAS:1139-30-6 MolWeight:220 RetIndex:1507

CompName:Caryophyllene oxide

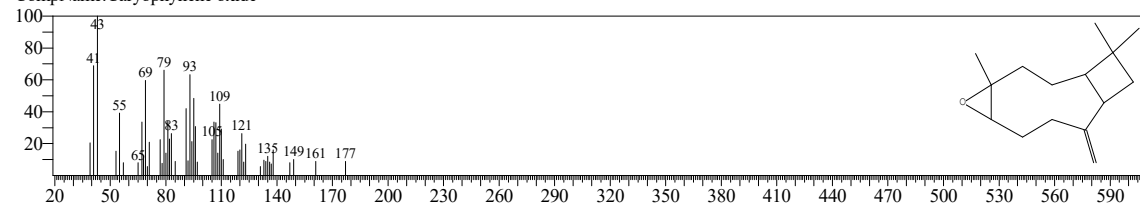

Hit#:7 Entry:257827 Library:W11N17MAIN1.lib

SI:88 Formula:C15H24O CAS:1139-30-6 MolWeight:220 RetIndex:1507

CompName:5-Oxatricyclo[8.2.0.0.4,6]dodecane, 4,12,12-trimethyl-9-methylene-, (1R,4R,6R,10S)-

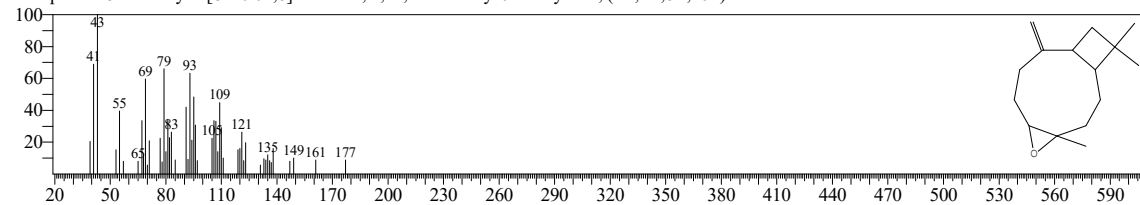

Hit#:8 Entry:91744 Library:NIST17.lib

SI:88 Formula:C15H24O CAS:1139-30-6 MolWeight:220 RetIndex:1507

CompName:Caryophyllene oxide

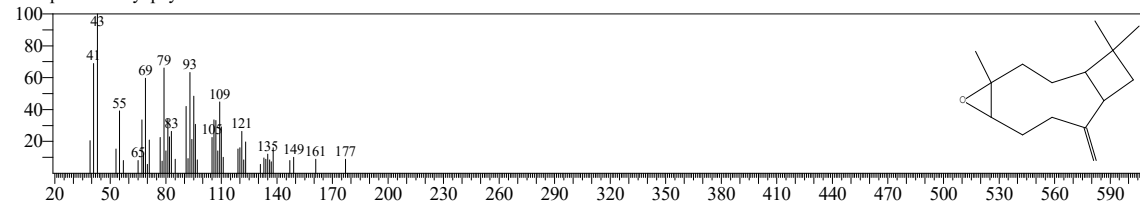



<< Target >>

Line#:35 R.Time:36.590(Scan#:6759) Retention Index:1574 MassPeaks:340

RawMode:Averaged 36.535-36.715(6748-6784) BasePeak:79.05(1606)

BG Mode:Calc. from Peak Group 1 - Event 1 Scan

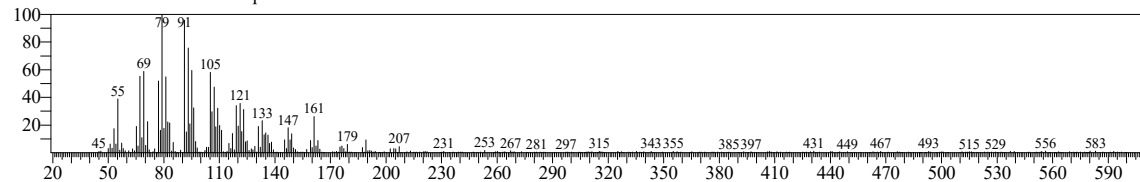

Hit#:9 Entry:257826 Library:W11N17MAIN1.lib

SI:88 Formula:C15H24O CAS:1139-30-6 MolWeight:220 RetIndex:1507

CompName:5-Oxatricyclo[8.2.0.0.4,6]dodecane, 4,12,12-trimethyl-9-methylene-, (1R,4R,6R,10S)-

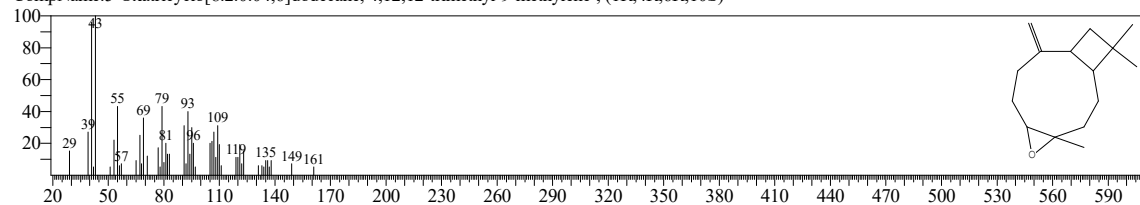

Hit#:10 Entry:91740 Library:NIST17.lib

SI:87 Formula:C15H24O CAS:1139-30-6 MolWeight:220 RetIndex:1507

CompName:Caryophyllene oxide

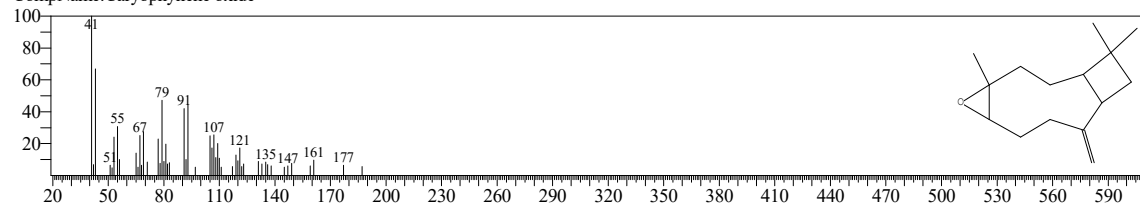

<< Target >>

Line#:36 R.Time:36.790(Scan#:6799) Retention Index:1579 MassPeaks:339

RawMode:Averaged 36.715-36.890(6784-6819) BasePeak:110.10(2123)

BG Mode:Calc. from Peak Group 1 - Event 1 Scan

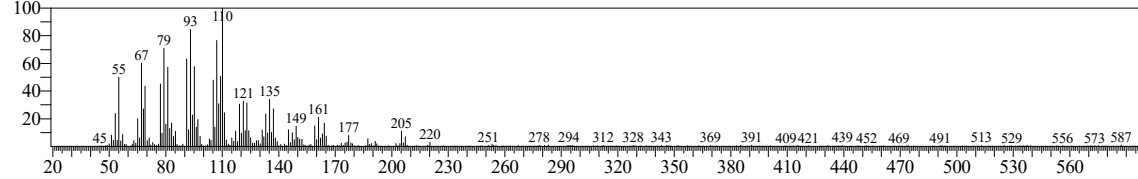

Hit#:1 Entry:257824 Library:W11N17MAIN1.lib

SI:87 Formula:C15H24O CAS:1139-30-6 MolWeight:220 RetIndex:1507

CompName:5-Oxatricyclo[8.2.0.0.4,6]dodecane, 4,12,12-trimethyl-9-methylene-, (1R,4R,6R,10S)-

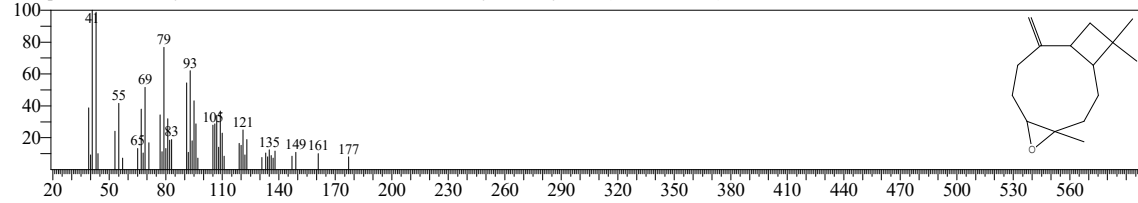

Hit#:2 Entry:257825 Library:W11N17MAIN1.lib

SI:86 Formula:C15H24O CAS:1139-30-6 MolWeight:220 RetIndex:1507

CompName:5-Oxatricyclo[8.2.0.0.4,6]dodecane, 4,12,12-trimethyl-9-methylene-, (1R,4R,6R,10S)-

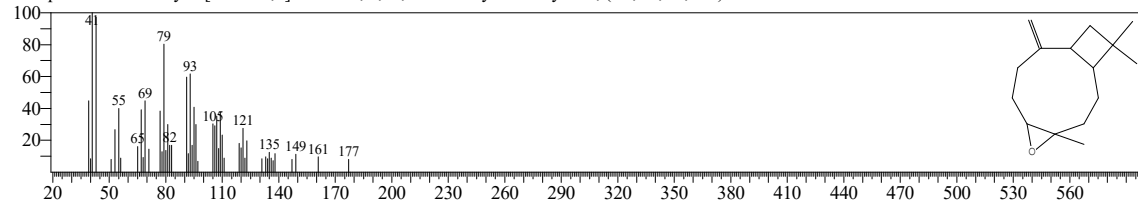

Hit#:3 Entry:257827 Library:W11N17MAIN1.lib

SI:86 Formula:C15H24O CAS:1139-30-6 MolWeight:220 RetIndex:1507

CompName:5-Oxatricyclo[8.2.0.0.4,6]dodecane, 4,12,12-trimethyl-9-methylene-, (1R,4R,6R,10S)-

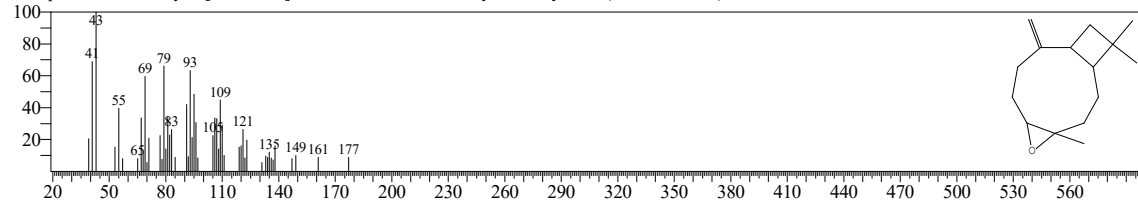

Hit#:4 Entry:91744 Library:NIST17.lib

SI:86 Formula:C15H24O CAS:1139-30-6 MolWeight:220 RetIndex:1507

CompName:Caryophyllene oxide

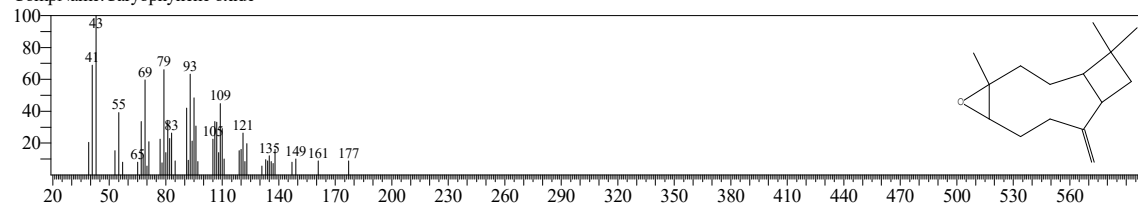

<< Target >>

Line#:36 R.Time:36.790(Scan#:6799) Retention Index:1579 MassPeaks:339

RawMode:Averaged 36.715-36.890(6784-6819) BasePeak:110.10(2123)

BG Mode:Calc. from Peak Group 1 - Event 1 Scan

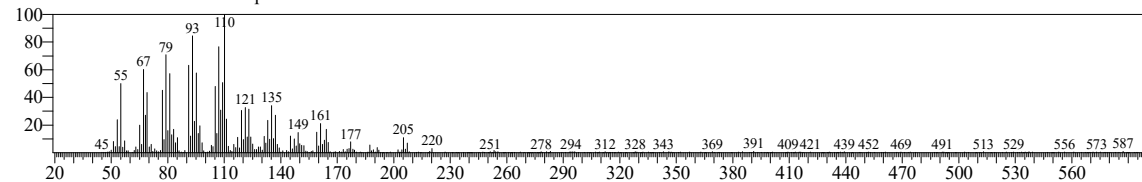

Hit#:5 Entry:257823 Library:W11N17MAIN1.lib

SI:86 Formula:C15H24O CAS:1139-30-6 MolWeight:220 RetIndex:1507

CompName:Caryophyllene oxide

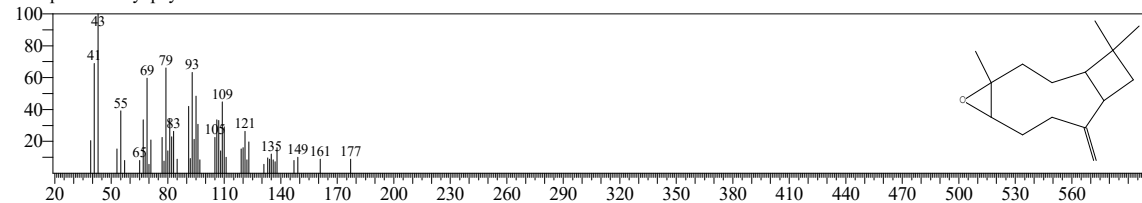

Hit#:6 Entry:257826 Library:W11N17MAIN1.lib

SI:86 Formula:C15H24O CAS:1139-30-6 MolWeight:220 RetIndex:1507

CompName:5-Oxatricyclo[8.2.0.0.4,6]dodecane, 4,12,12-trimethyl-9-methylene-, (1R,4R,6R,10S)-

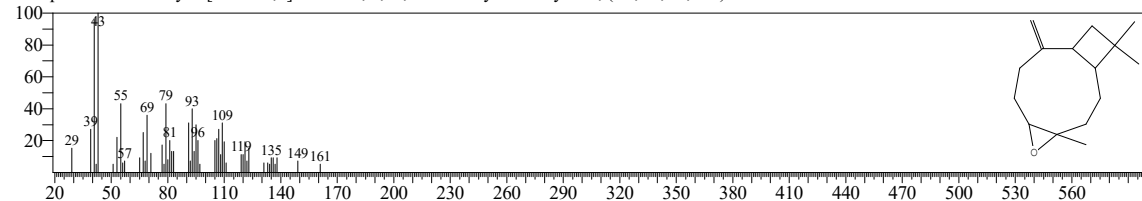

Hit#:7 Entry:145 Library:FFNSC 1.2.lib

SI:85 Formula:C15H24O CAS:1139-30-6 MolWeight:220 RetIndex:1587

CompName:Caryophyllene oxide; Dodecane <5-oxatricyclo(8.2.0.0.4,6), 4,12,12-trimethyl-, 9-methylene->

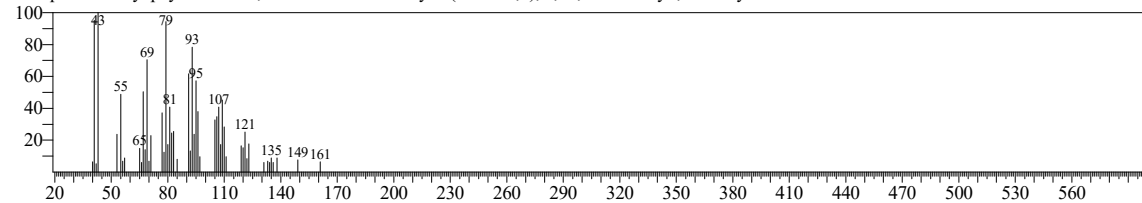

Hit#:8 Entry:91570 Library:NIST17.lib

SI:85 Formula:C15H24O CAS:1139-30-6 MolWeight:220 RetIndex:1507

CompName:Caryophyllene oxide

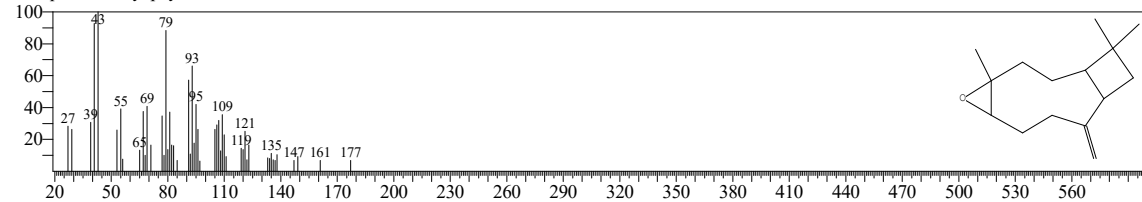

<< Target >>

Line#:36 R.Time:36.790(Scan#:6799) Retention Index:1579 MassPeaks:339

RawMode:Averaged 36.715-36.890(6784-6819) BasePeak:110.10(2123)

BG Mode:Calc. from Peak Group 1 - Event 1 Scan

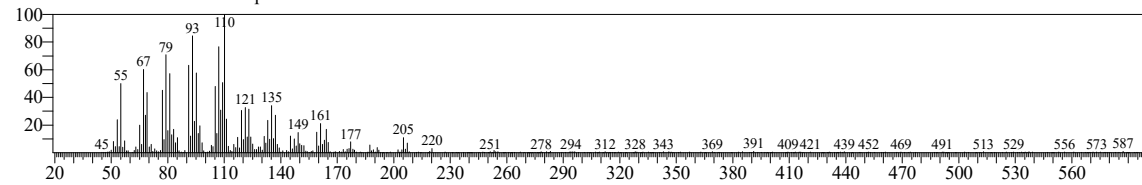

Hit#:9 Entry:257821 Library:W11N17MAIN1.lib

SI:85 Formula:C15H24O CAS:1139-30-6 MolWeight:220 RetIndex:1507

CompName:Caryophyllene oxide

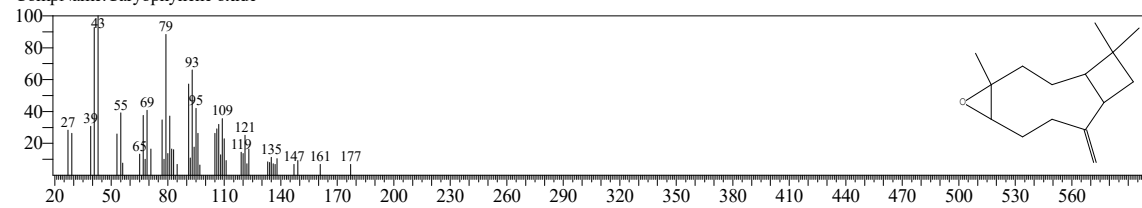

Hit#:10 Entry:257319 Library:W11N17MAIN1.lib

SI:83 Formula:C15H24O CAS:0-00-0 MolWeight:220 RetIndex:1531

CompName:cis-Z-.alpha.-Bisabolene epoxide

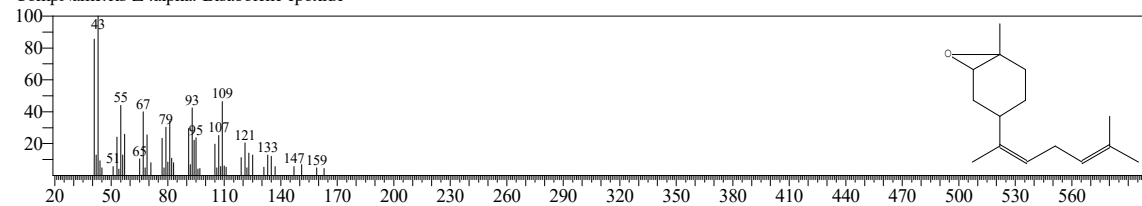

<< Target >>

Line#:37 R.Time:37.590(Scan#:6959) Retention Index:1600 MassPeaks:281

RawMode:Averaged 37.530-37.640(6947-6969) BasePeak:67.10(1252)

BG Mode:Calc. from Peak Group 1 - Event 1 Scan

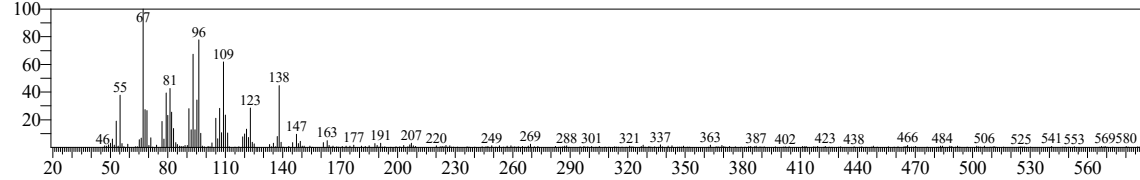

Hit#:1 Entry:91639 Library:NIST17.lib

SI:91 Formula:C15H24O CAS:19888-34-7 MolWeight:220 RetIndex:1592

CompName:(1R,3E,7E,11R)-1,5,5,8-Tetramethyl-12-oxabicyclo[9.1.0]dodeca-3,7-diene

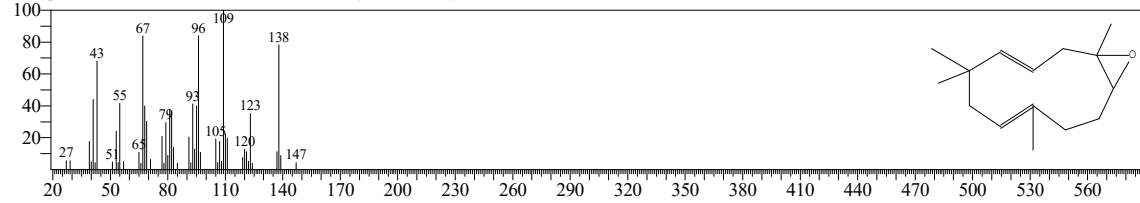

Hit#:2 Entry:257942 Library:W11N17MAIN1.lib

SI:91 Formula:C15H24O CAS:19888-34-7 MolWeight:220 RetIndex:1592

CompName:(1R,3E,7E,11R)-1,5,5,8-Tetramethyl-12-oxabicyclo[9.1.0]dodeca-3,7-diene

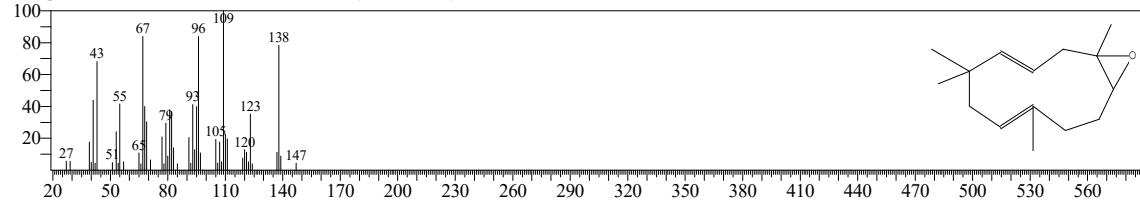

Hit#:3 Entry:19344 Library:NIST17.lib

SI:83 Formula:C9H14O CAS:6975-94-6 MolWeight:138 RetIndex:1073

CompName:3,5-Dimethylcyclohex-1-ene-4-carboxaldehyde

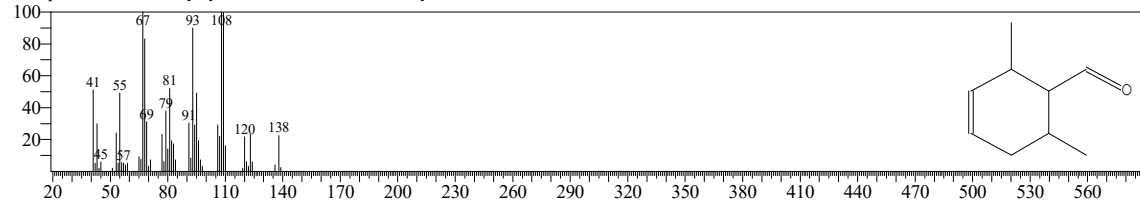

Hit#:4 Entry:42839 Library:W11N17MAIN1.lib

SI:83 Formula:C9H14O CAS:6975-94-6 MolWeight:138 RetIndex:1073

CompName:3,5-Dimethylcyclohex-1-ene-4-carboxaldehyde

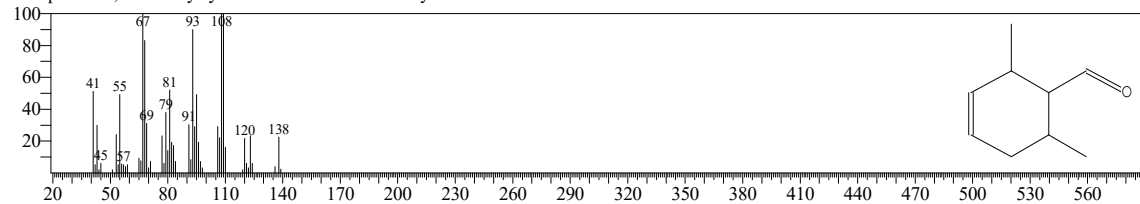

<< Target >>

Line#:37 R.Time:37.590(Scan#:6959) Retention Index:1600 MassPeaks:281

RawMode:Averaged 37.530-37.640(6947-6969) BasePeak:67.10(1252)

BG Mode:Calc. from Peak Group 1 - Event 1 Scan

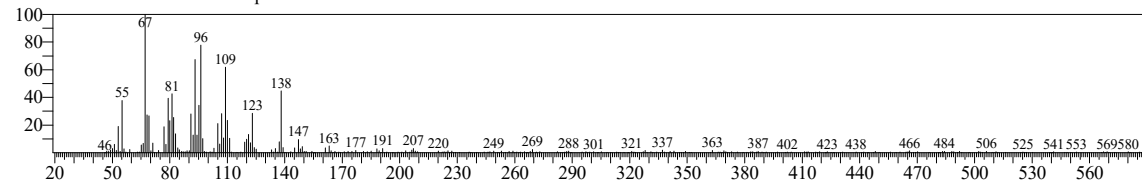

Hit#:5 Entry:66913 Library:W11N17MAIN1.lib

SI:83 Formula:C10H16O CAS:13837-75-7 MolWeight:152 RetIndex:1031

CompName:cis-Limonene oxide

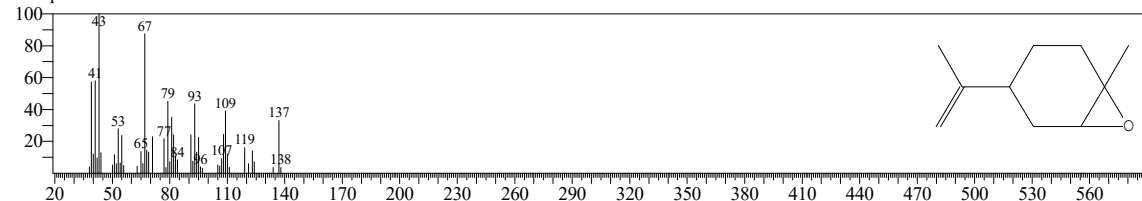

Hit#:6 Entry:66912 Library:W11N17MAIN1.lib

SI:83 Formula:C10H16O CAS:13837-75-7 MolWeight:152 RetIndex:1031

CompName:cis-Limonene oxide

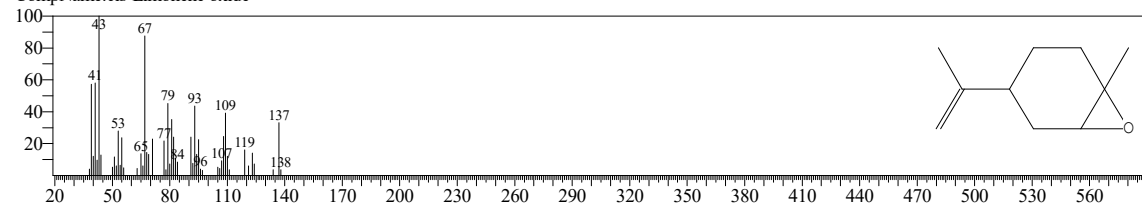

Hit#:7 Entry:91747 Library:NIST17.lib

SI:83 Formula:C15H24O CAS:19888-34-7 MolWeight:220 RetIndex:1592

CompName:(1R,3E,7E,11R)-1,5,5,8-Tetramethyl-12-oxabicyclo[9.1.0]dodeca-3,7-diene

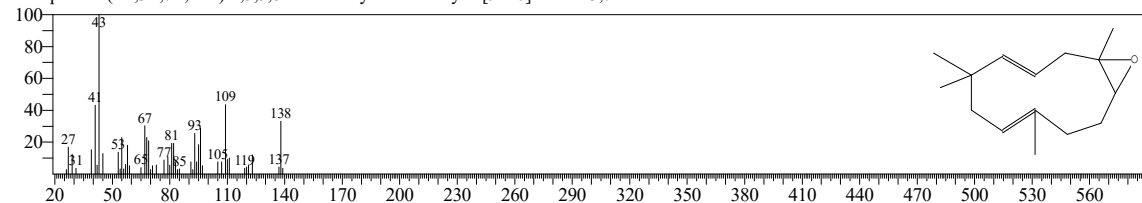

Hit#:8 Entry:257821 Library:W11N17MAIN1.lib

SI:83 Formula:C15H24O CAS:1139-30-6 MolWeight:220 RetIndex:1507

CompName:Caryophyllene oxide

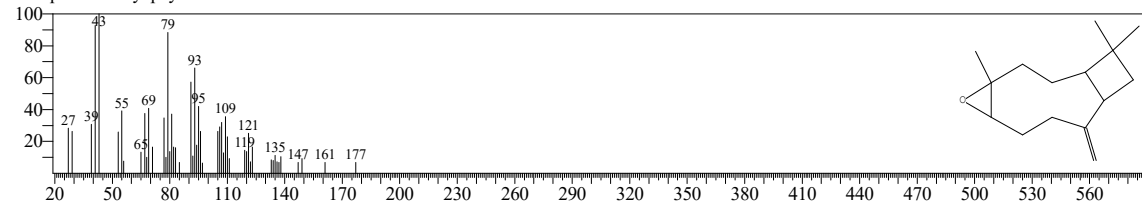

<< Target >>

Line#:37 R.Time:37.590(Scan#:6959) Retention Index:1600 MassPeaks:281

RawMode:Averaged 37.530-37.640(6947-6969) BasePeak:67.10(1252)

BG Mode:Calc. from Peak Group 1 - Event 1 Scan

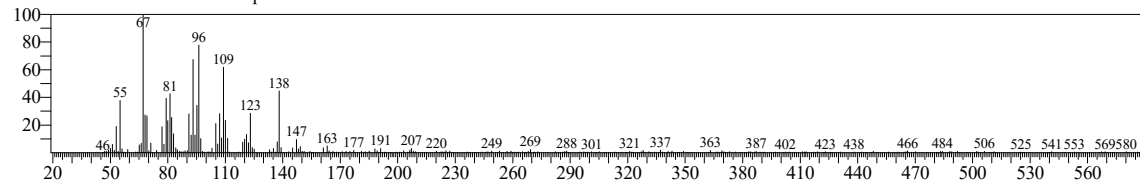

Hit#:9 Entry:91570 Library:NIST17.lib

SI:83 Formula:C15H24O CAS:1139-30-6 MolWeight:220 RetIndex:1507

CompName:Caryophyllene oxide

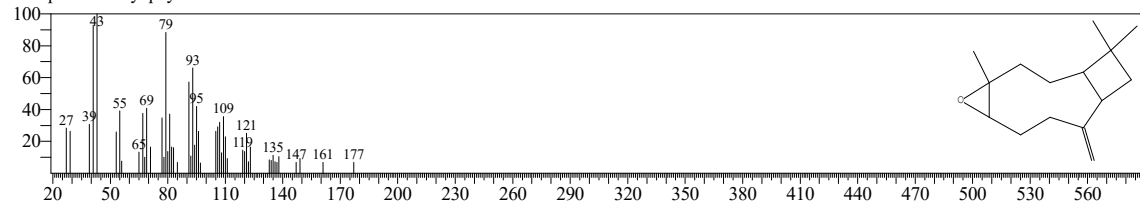

Hit#:10 Entry:257941 Library:W11N17MAIN1.lib

SI:83 Formula:C15H24O CAS:19888-34-7 MolWeight:220 RetIndex:1592

CompName:(1R,3E,7E,11R)-1,5,5,8-Tetramethyl-12-oxabicyclo[9.1.0]dodeca-3,7-diene

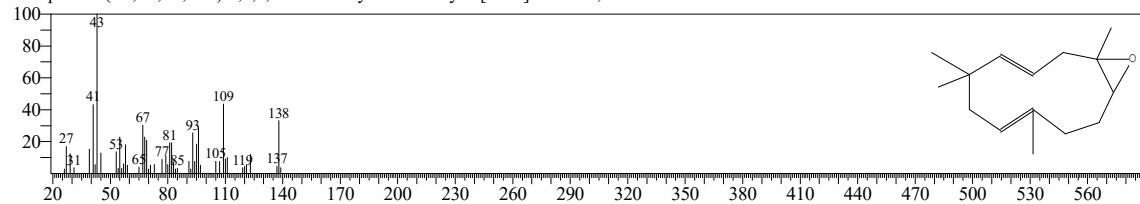

<< Target >>

Line#:38 R.Time:37.705(Scan#:6982) Retention Index:1603 MassPeaks:310

RawMode:Averaged 37.640-37.840(6969-7009) BasePeak:105.10(1262)

BG Mode:Calc. from Peak Group 1 - Event 1 Scan

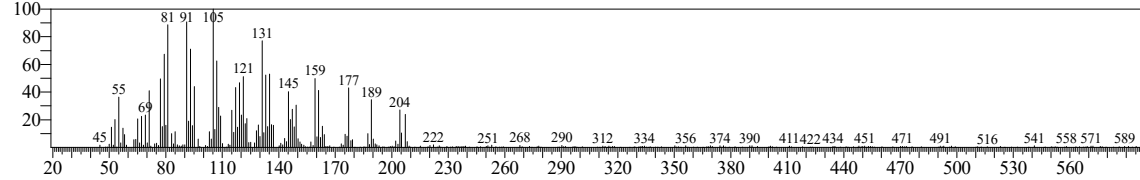

Hit#:1 Entry:203780 Library:W11N17MAIN1.lib

SI:83 Formula:C15H24 CAS:0-00-0 MolWeight:204 RetIndex:1471

CompName:cis-(-)-2,4a,5,6,9a-Hexahydro-3,5,5,9-tetramethyl(1H)benzocycloheptene

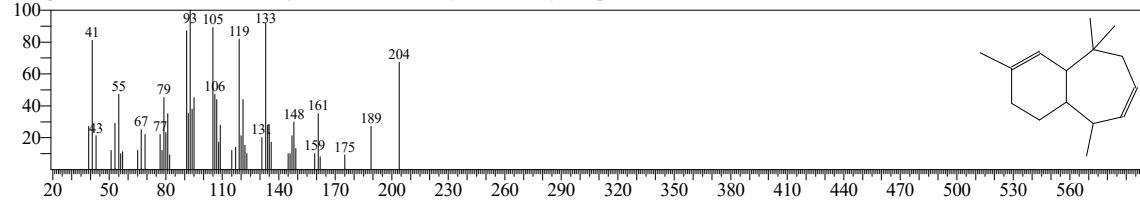

Hit#:2 Entry:75038 Library:NIST17.lib

SI:83 Formula:C15H24 CAS:0-00-0 MolWeight:204 RetIndex:1471

CompName:cis-(-)-2,4a,5,6,9a-Hexahydro-3,5,5,9-tetramethyl(1H)benzocycloheptene

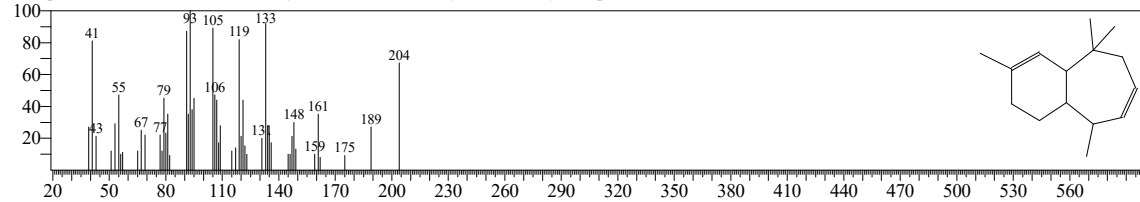

Hit#:3 Entry:203859 Library:W11N17MAIN1.lib

SI:82 Formula:C15H24 CAS:41432-70-6 MolWeight:204 RetIndex:1398

CompName:beta.-Longipinene

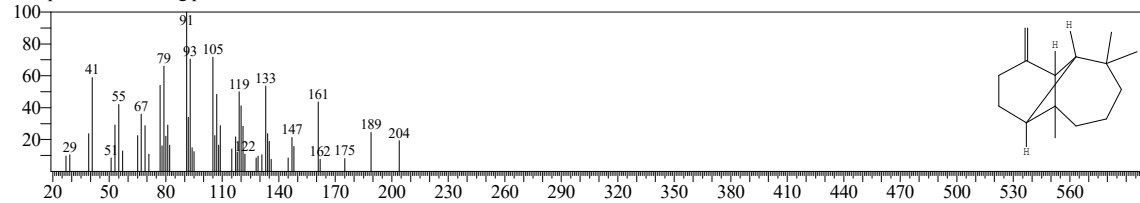

Hit#:4 Entry:75010 Library:NIST17.lib

SI:82 Formula:C15H24 CAS:41432-70-6 MolWeight:204 RetIndex:1398

CompName:beta.-Longipinene

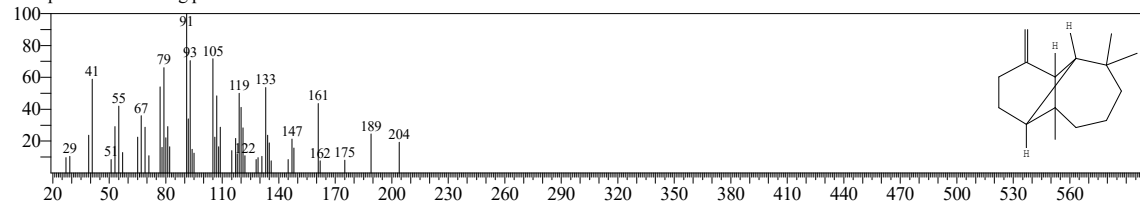



<< Target >>

Line#:38 R.Time:37.705(Scan#:6982) Retention Index:1603 MassPeaks:310

RawMode:Averaged 37.640-37.840(6969-7009) BasePeak:105.10(1262)

BG Mode:Calc. from Peak Group 1 - Event 1 Base

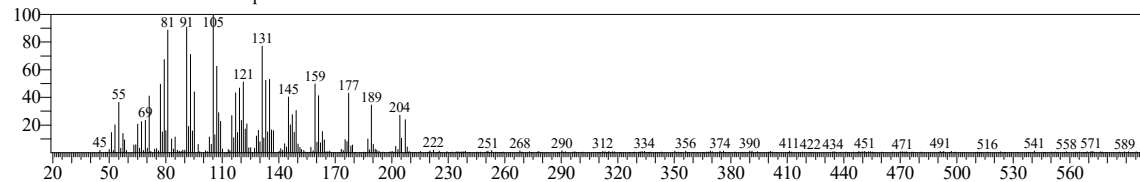

Hit#:5 Entry:441560 Library:W11N17MAIN1.lib

SI:82 Formula:C20H32 CAS:1898-13-1 MolWeight:272 RetIndex:2072

CompName:1,3,6,10-Cyclotetradecatetraene, 3,7,11-trimethyl-14-(1-methylethyl)-, [S-(E,Z,E,E)]-

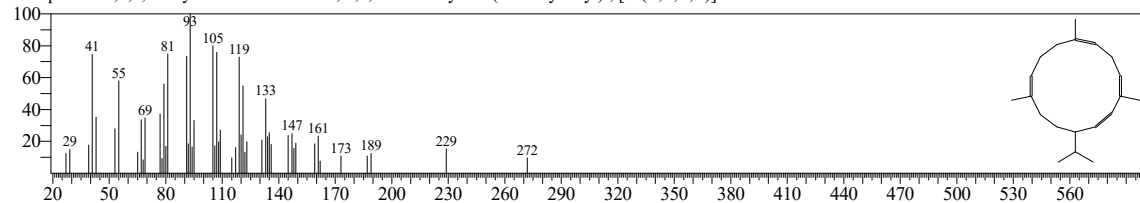

Hit#:6 Entry:146749 Library:NIST17.lib

SI:82 Formula:C20H32 CAS:1898-13-1 MolWeight:272 RetIndex:2072

CompName:1,3,6,10-Cyclotetradecatetraene, 3,7,11-trimethyl-14-(1-methylethyl)-, [S-(E,Z,E,E)]-

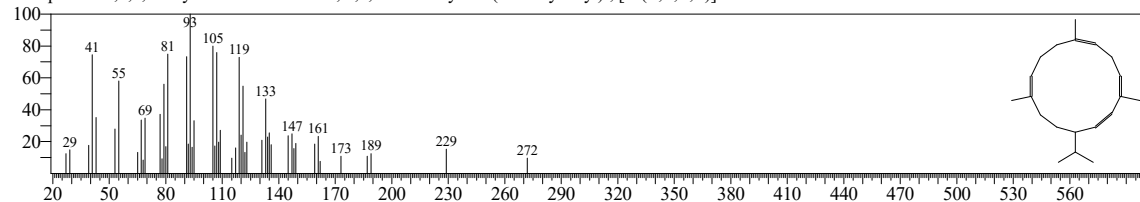

Hit#:7 Entry:441554 Library:W11N17MAIN1.lib

SI:81 Formula:C20H32 CAS:1898-13-1 MolWeight:272 RetIndex:2072

CompName:1,3,6,10-Cyclotetradecatetraene, 14-isopropyl-3,7,11-trimethyl-, (+)-

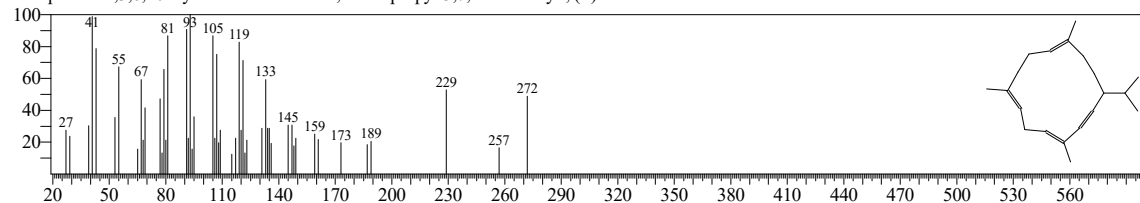

Hit#:8 Entry:75238 Library:NIST17.lib

SI:81 Formula:C15H24 CAS:22567-17-5 MolWeight:204 RetIndex:1461

CompName:Azulene, 1,2,3,3a,4,5,6,7-octahydro-1,4-dimethyl-7-(1-methylethenyl)-, [1R-(1.alpha.,3a.beta.,4.alpha.,7.beta.)]-

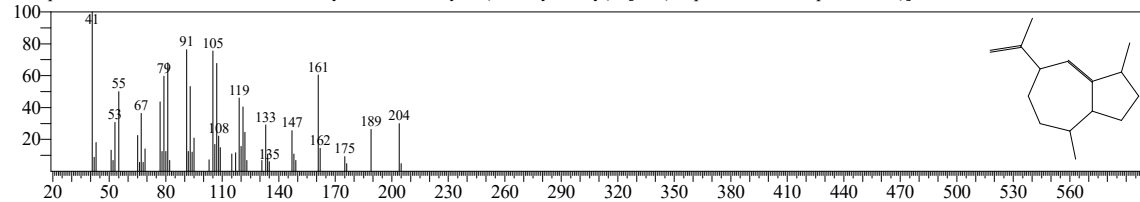

<< Target >>

Line#:38 R.Time:37.705(Scan#:6982) Retention Index:1603 MassPeaks:310

RawMode:Averaged 37.640-37.840(6969-7009) BasePeak:105.10(1262)

BG Mode:Calc. from Peak Group 1 - Event 1 Scan

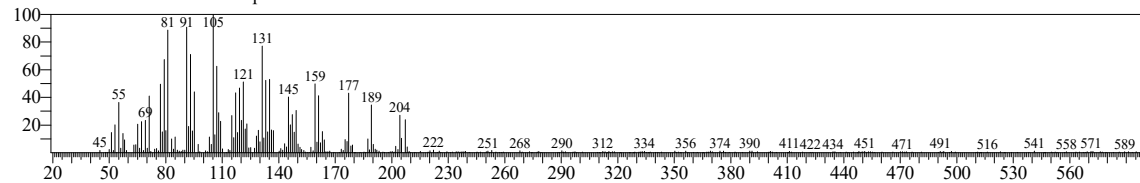

Hit#:9 Entry:203867 Library:W11N17MAIN1.lib

SI:81 Formula:C15H24 CAS:22567-17-5 MolWeight:204 RetIndex:1461

CompName:Azulene, 1,2,3,3a,4,5,6,7-octahydro-1,4-dimethyl-7-(1-methylethenyl)-, [1R-(1.alpha.,3a.beta.,4.alpha.,7.beta.)]-

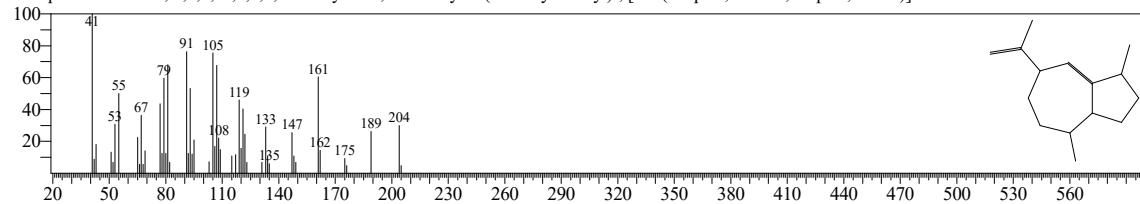

Hit#:10 Entry:204610 Library:W11N17MAIN1.lib

SI:80 Formula:C15H24 CAS:21747-46-6 MolWeight:204 RetIndex:1419

CompName:1H-Cycloprop[e]azulene, 1a,2,3,5,6,7,7a,7b-octahydro-1,1,4,7-tetramethyl-, [1aR-(1.alpha.,7.alpha.,7a.beta.,7b.alpha.)]-

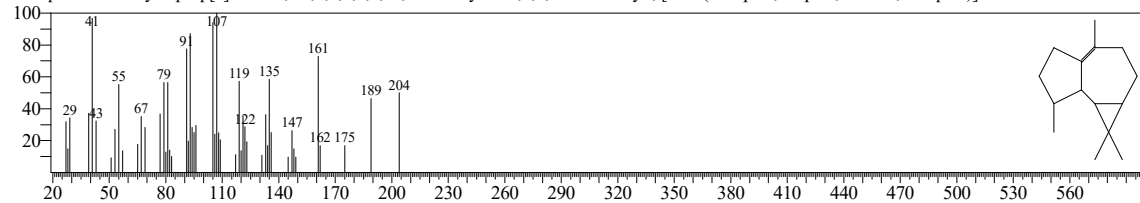

<< Target >>

Line#:39 R.Time:38.730(Scan#:7187) Retention Index:1630 MassPeaks:281

RawMode:Averaged 38.650-38.735(7171-7188) BasePeak:91.05(329)

BG Mode:Calc. from Peak Group 1 - Event 1 Scan

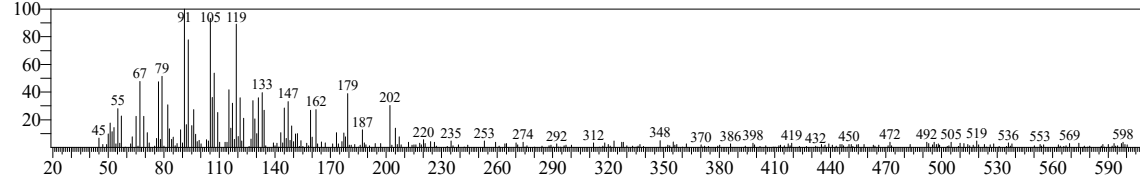

Hit#:1 Entry:257452 Library:W11N17MAIN1.lib

SI:81 Formula:C15H24O CAS:6750-60-3 MolWeight:220 RetIndex:1536

CompName:1H-Cycloprop[e]azulen-7-ol, decahydro-1,1,7-trimethyl-4-methylene-, [1a-(1.alpha.,4a.alpha.,7.beta.,7a.beta.,7b.alpha.)]-

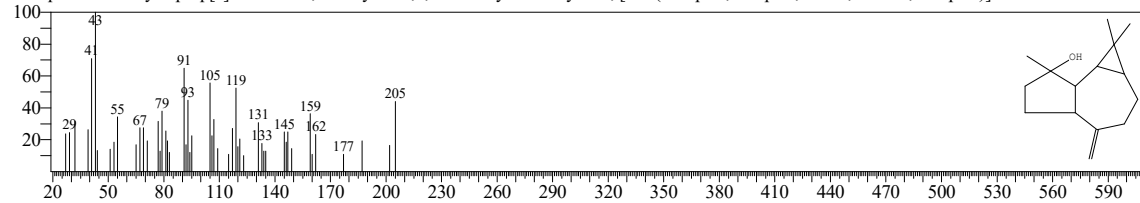

Hit#:2 Entry:91745 Library:NIST17.lib

SI:81 Formula:C15H24O CAS:6750-60-3 MolWeight:220 RetIndex:1536

CompName:1H-Cycloprop[e]azulen-7-ol, decahydro-1,1,7-trimethyl-4-methylene-, [1a-(1.alpha.,4a.alpha.,7.beta.,7a.beta.,7b.alpha.)]-

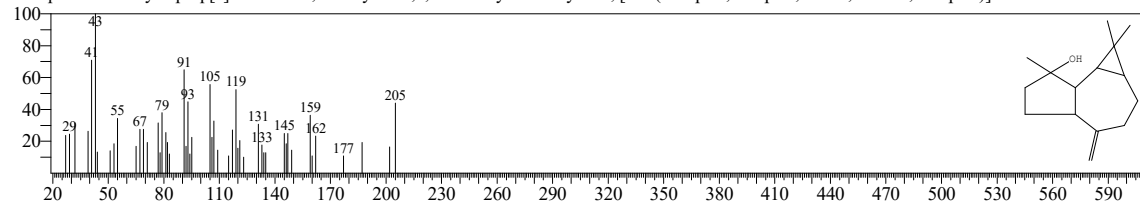

Hit#:3 Entry:257440 Library:W11N17MAIN1.lib

SI:80 Formula:C15H24O CAS:0-00-0 MolWeight:220 RetIndex:1569

CompName:Isospathulenol

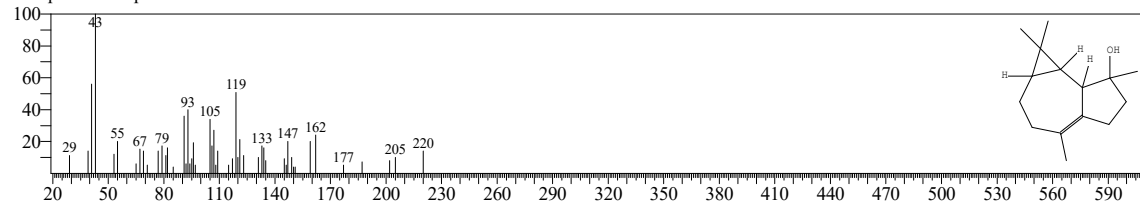

Hit#:4 Entry:257449 Library:W11N17MAIN1.lib

SI:80 Formula:C15H24O CAS:77171-55-2 MolWeight:220 RetIndex:1536

CompName:(-)-Spathulenol

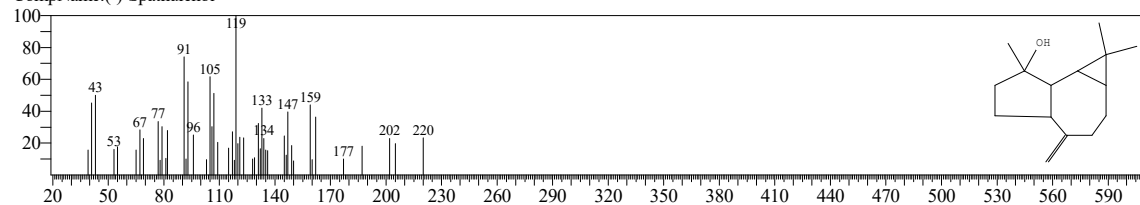

<< Target >>

Line#:39 R.Time:38.730(Scan#:7187) Retention Index:1630 MassPeaks:281

RawMode:Averaged 38.650-38.735(7171-7188) BasePeak:91.05(329)

BG Mode:Calc. from Peak Group 1 - Event 1 Scan

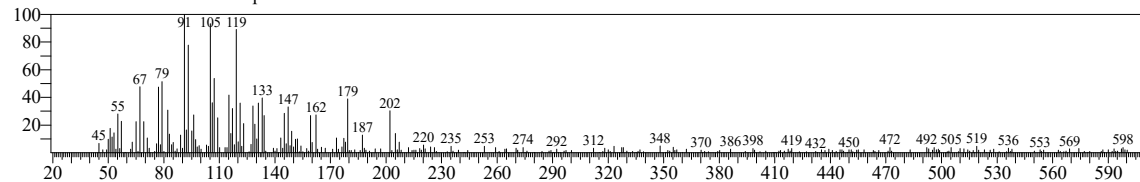

Hit#:5 Entry:91765 Library:NIST17.lib

SI:80 Formula:C15H24O CAS:77171-55-2 MolWeight:220 RetIndex:1536

CompName:(-)-Spathulenol

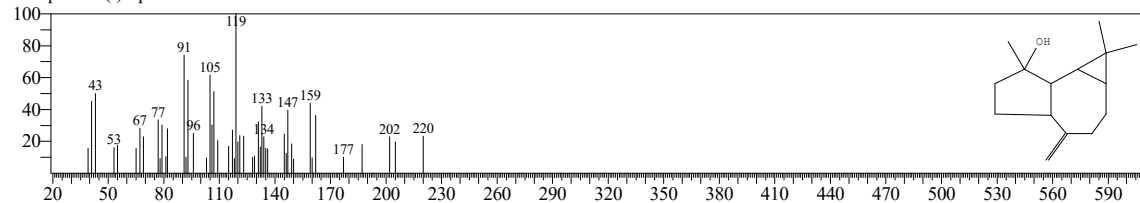

Hit#:6 Entry:257448 Library:W11N17MAIN1.lib

SI:78 Formula:C15H24O CAS:6750-60-3 MolWeight:220 RetIndex:1536

CompName:1H-Cycloprop[e]azulen-7-ol, decahydro-1,1,7-trimethyl-4-methylene-, [1ar-(1a.alpha.,4a.alpha.,7.beta.,7a.beta.,7b.alpha.)]-

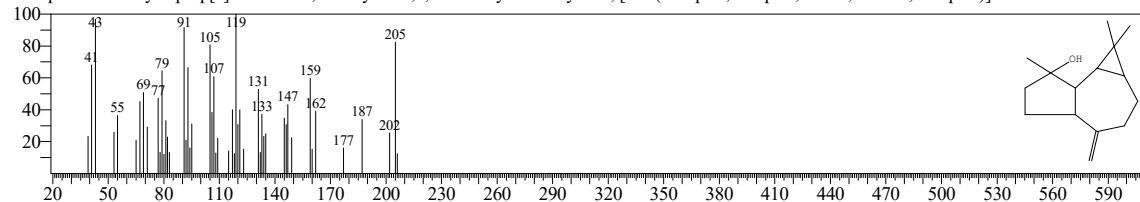

Hit#:7 Entry:91764 Library:NIST17.lib

SI:78 Formula:C15H24O CAS:6750-60-3 MolWeight:220 RetIndex:1536

CompName:1H-Cycloprop[e]azulen-7-ol, decahydro-1,1,7-trimethyl-4-methylene-, [1ar-(1a.alpha.,4a.alpha.,7.beta.,7a.beta.,7b.alpha.)]-

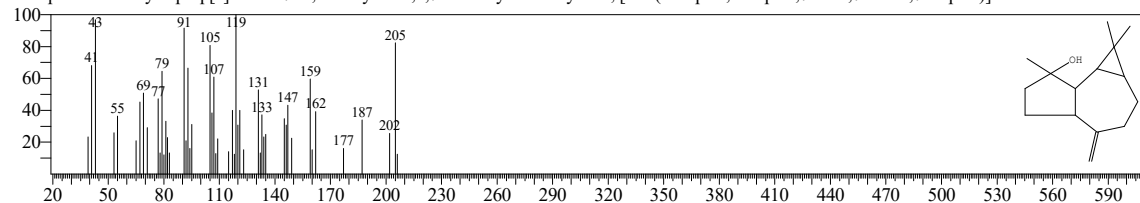

Hit#:8 Entry:903 Library:FFNSC 1.2.lib

SI:78 Formula:C15H24O CAS:6750-60-3 MolWeight:220 RetIndex:1576

CompName:Spathulenol; Cycloprop[e]azulen-7-ol <decahydro-, 1,1,7-trimethyl-, 4-methylene-, 1H->

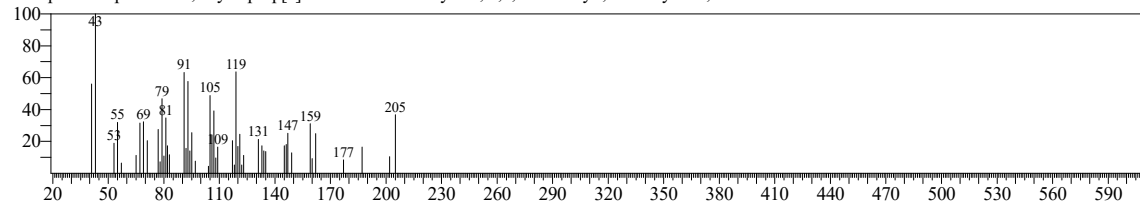

<< Target >>

Line#:39 R.Time:38.730(Scan#:7187) Retention Index:1630 MassPeaks:281

RawMode:Averaged 38.650-38.735(7171-7188) BasePeak:91.05(329)

BG Mode:Calc. from Peak Group 1 - Event 1 Scan

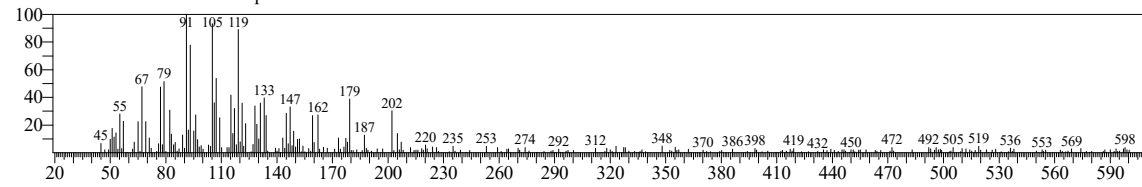

Hit#:9 Entry:257453 Library:W11N17MAIN1.lib

SI:76 Formula:C15H24O CAS:77171-55-2 MolWeight:220 RetIndex:1536

CompName:(-)-Spathulenol

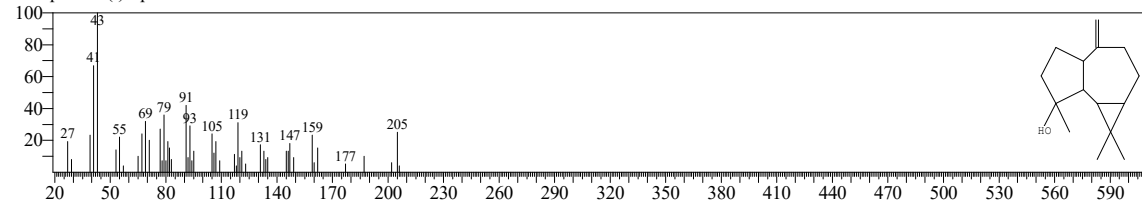

Hit#:10 Entry:257447 Library:W11N17MAIN1.lib

SI:75 Formula:C15H24O CAS:77171-55-2 MolWeight:220 RetIndex:1536

CompName:(-)-Spathulenol

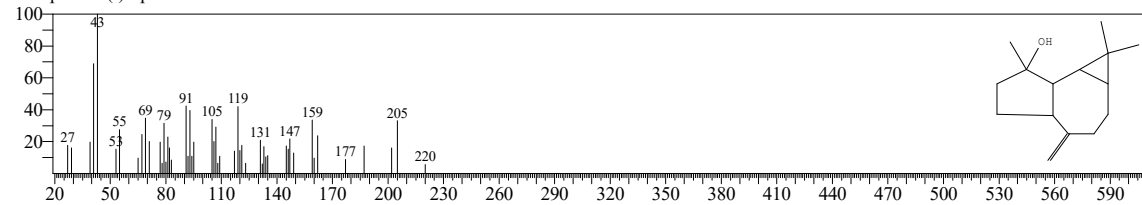

<< Target >>

Line#:40 R.Time:38.830(Scan#:7207) Retention Index:1633 MassPeaks:361

RawMode:Averaged 38.735-38.920(7188-7225) BasePeak:161.15(2832)

BG Mode:Calc. from Peak Group 1 - Event 1 Scan

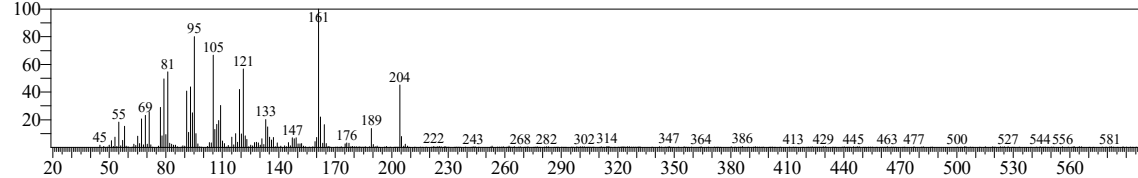

Hit#:1 Entry:94177 Library:NIST17.lib

SI:93 Formula:C15H26O CAS:5937-11-1 MolWeight:222 RetIndex:1580

CompName:tau.-Cadinol

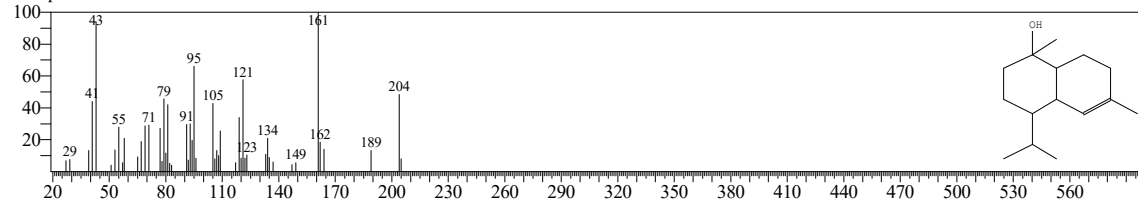

Hit#:2 Entry:265617 Library:W11N17MAIN1.lib

SI:93 Formula:C15H26O CAS:5937-11-1 MolWeight:222 RetIndex:1580

CompName:tau.-Cadinol

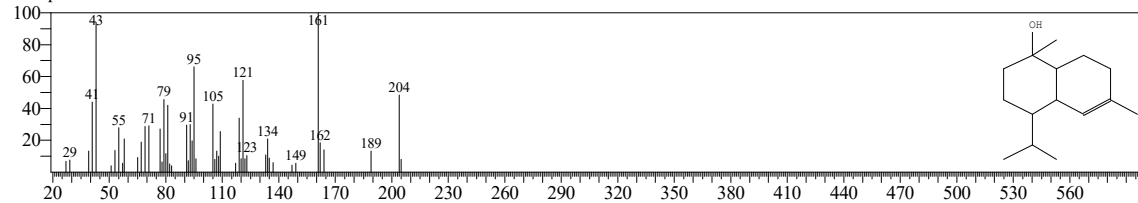

Hit#:3 Entry:265623 Library:W11N17MAIN1.lib

SI:91 Formula:C15H26O CAS:19912-62-0 MolWeight:222 RetIndex:1580

CompName:tau.-Muurolol

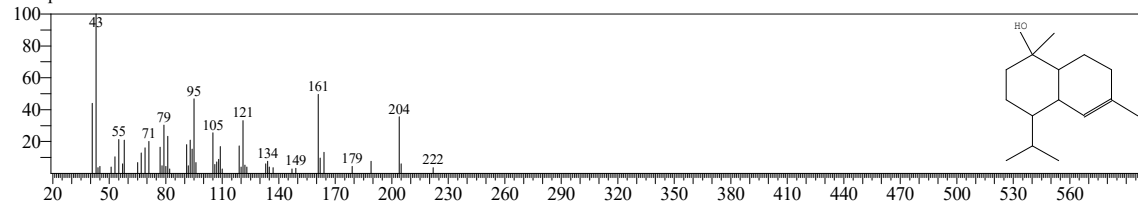

Hit#:4 Entry:94125 Library:NIST17.lib

SI:91 Formula:C15H26O CAS:19912-62-0 MolWeight:222 RetIndex:1580

CompName:tau.-Muurolol

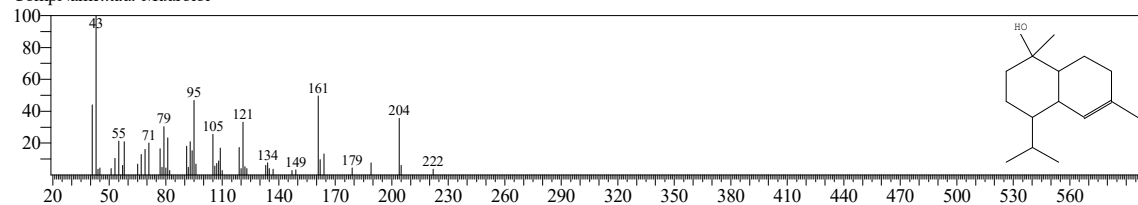

<< Target >>

Line#:40 R.Time:38.830(Scan#:7207) Retention Index:1633 MassPeaks:361

RawMode:Averaged 38.735-38.920(7188-7225) BasePeak:161.15(2832)

BG Mode:Calc. from Peak Group 1 - Event 1 Scan

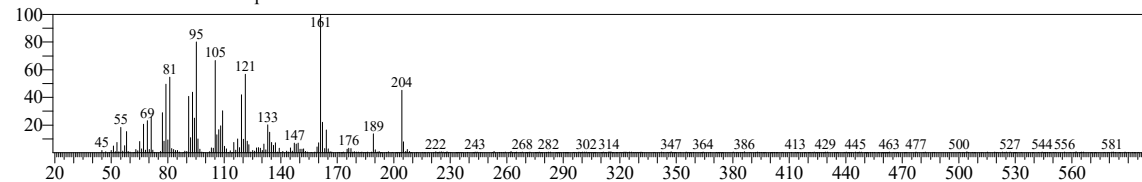

Hit#:5 Entry:265615 Library:W11N17MAIN1.lib

SI:88 Formula:C15H26O CAS:19912-62-0 MolWeight:222 RetIndex:1580

CompName:.tau.-Muurolol

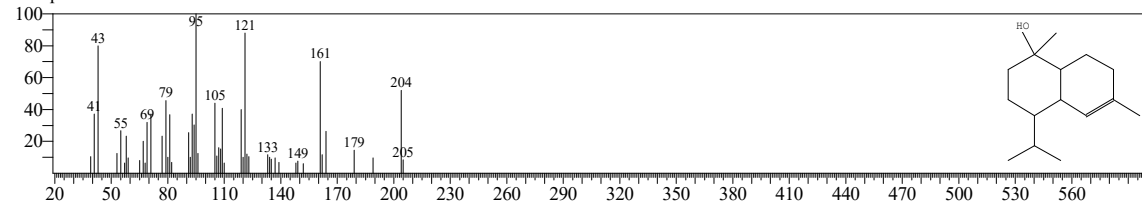

Hit#:6 Entry:94033 Library:NIST17.lib

SI:88 Formula:C15H26O CAS:19912-62-0 MolWeight:222 RetIndex:1580

CompName:.tau.-Muurolol

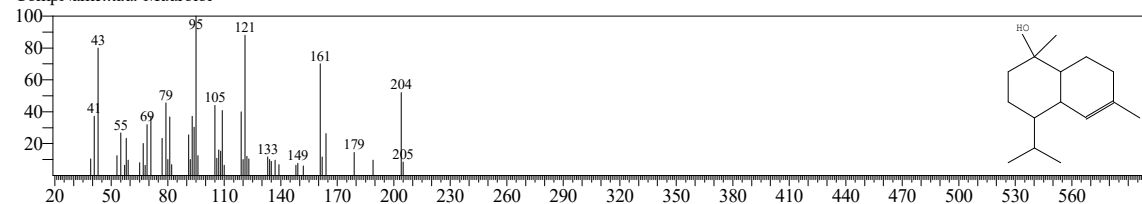

Hit#:7 Entry:265621 Library:W11N17MAIN1.lib

SI:87 Formula:C15H26O CAS:481-34-5 MolWeight:222 RetIndex:1580

CompName:.alpha.-Cadinol

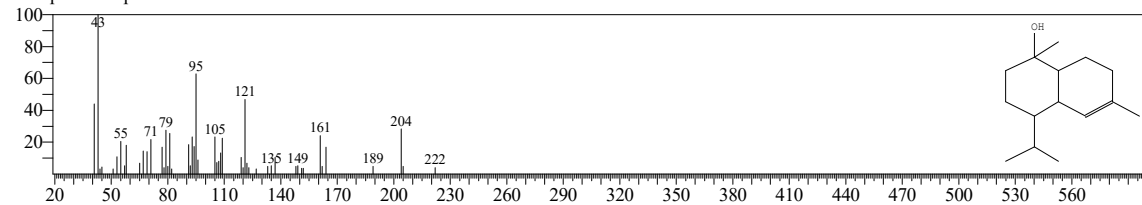

Hit#:8 Entry:94121 Library:NIST17.lib

SI:87 Formula:C15H26O CAS:481-34-5 MolWeight:222 RetIndex:1580

CompName:.alpha.-Cadinol

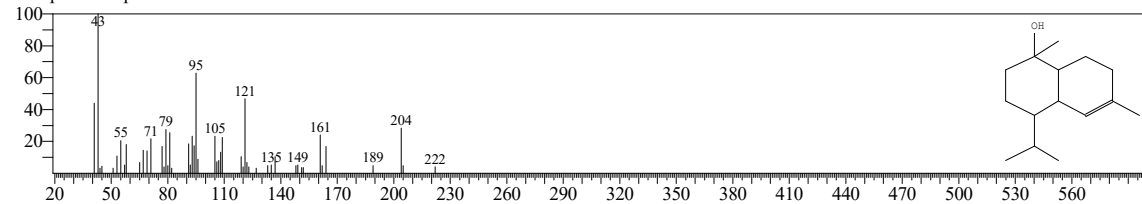

<< Target >>

Line#:40 R.Time:38.830(Scan#:7207) Retention Index:1633 MassPeaks:361

RawMode:Averaged 38.735-38.920(7188-7225) BasePeak:161.15(2832)

BG Mode:Calc. from Peak Group 1 - Event 1 Scan

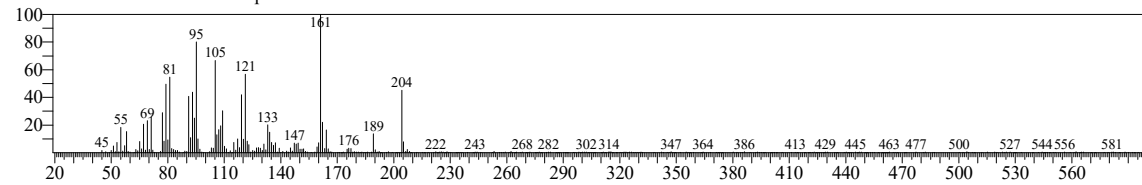

Hit#:9 Entry:265622 Library:W11N17MAIN1.lib

SI:87 Formula:C15H26O CAS:5937-11-1 MolWeight:222 RetIndex:1580

CompName:.tau.-Cadinol

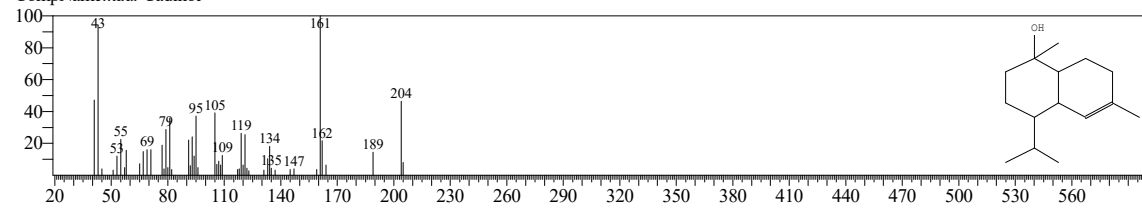

Hit#:10 Entry:94081 Library:NIST17.lib

SI:87 Formula:C15H26O CAS:5937-11-1 MolWeight:222 RetIndex:1580

CompName:.tau.-Cadinol

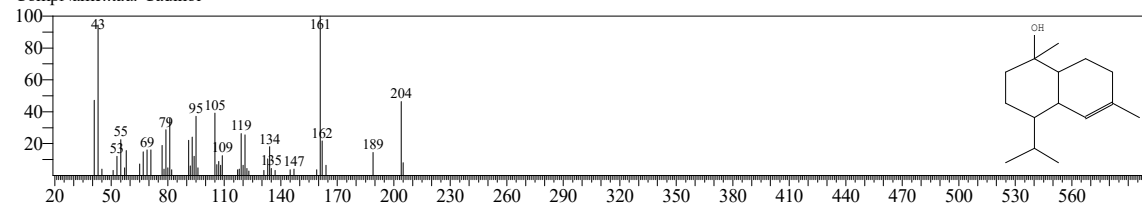



<< Target >>

Line#:41 R.Time:38.980(Scan#:7237) Retention Index:1637 MassPeaks:311

RawMode:Averaged 38.920-39.050(7225-7251) BasePeak:81.05(1015)

BG Mode:Calc. from Peak Group 1 - Event 1 Scan

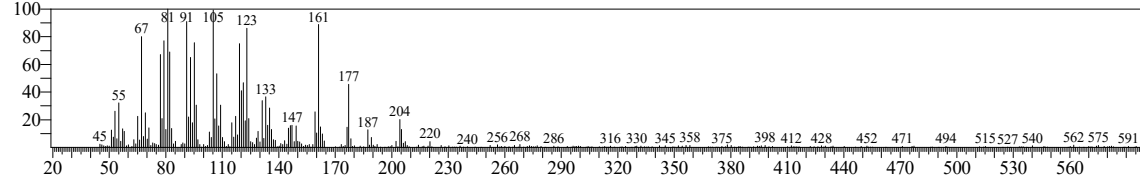

Hit#:1 Entry:258171 Library:W11N17MAIN1.lib

SI:84 Formula:C15H24O CAS:0-00-0 MolWeight:220 RetIndex:1462

CompName:Aromadendrene oxide-(2)

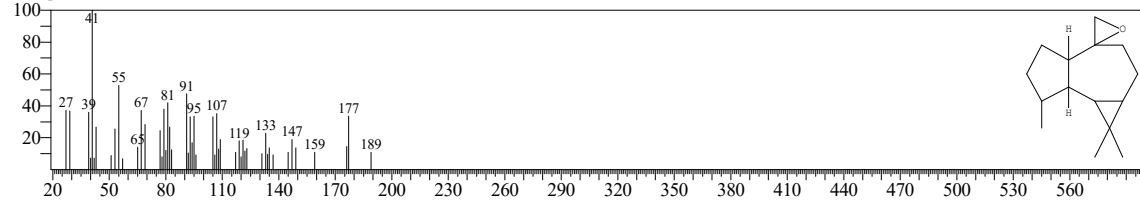

Hit#:2 Entry:258170 Library:W11N17MAIN1.lib

SI:84 Formula:C15H24O CAS:85710-39-0 MolWeight:220 RetIndex:1462

CompName:1,1,7-trimethylspiro[2,3,4a,5,6,7,7a,7b-octahydro-1aH-cyclopropa[e]azulene-4,2'-oxirane]

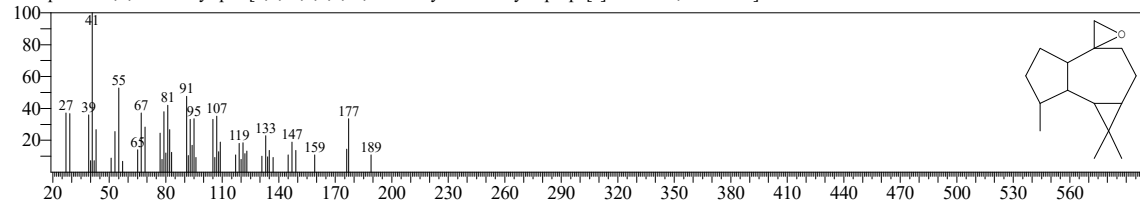

Hit#:3 Entry:91557 Library:NIST17.lib

SI:84 Formula:C15H24O CAS:0-00-0 MolWeight:220 RetIndex:1462

CompName:Aromadendrene oxide-(2)

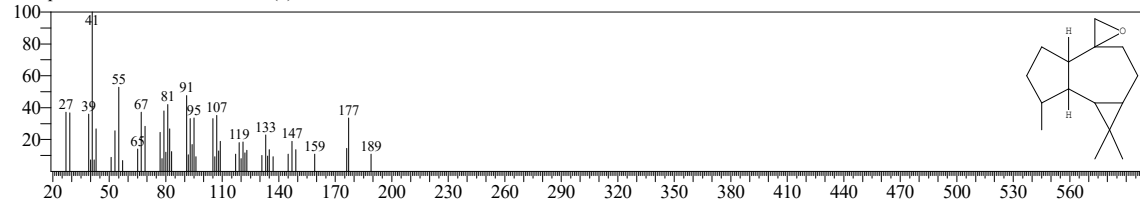

Hit#:4 Entry:257479 Library:W11N17MAIN1.lib

SI:83 Formula:C15H24O CAS:0-00-0 MolWeight:220 RetIndex:1281

CompName:Isoaromadendrene epoxide

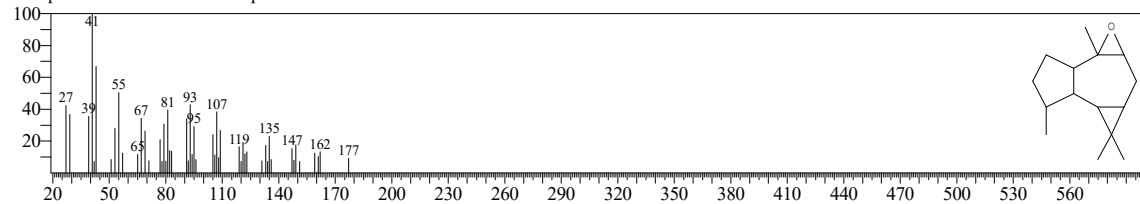

<< Target >>

Line#:41 R.Time:38.980(Scan#:7237) Retention Index:1637 MassPeaks:311

RawMode:Averaged 38.920-39.050(7225-7251) BasePeak:81.05(1015)

BG Mode:Calc. from Peak Group 1 - Event 1 Scan

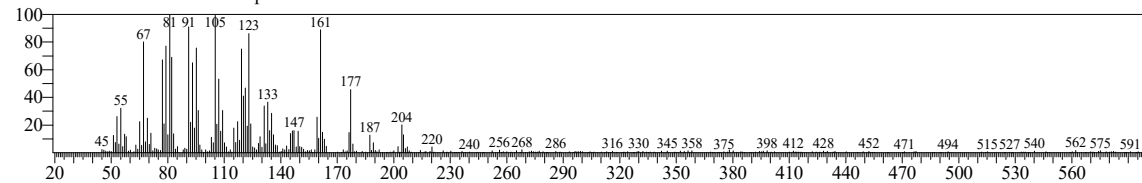

Hit#:5 Entry:91551 Library:NIST17.lib

SI:83 Formula:C15H24O CAS:0-00-0 MolWeight:220 RetIndex:1281

CompName:Isoaromadendrene epoxide

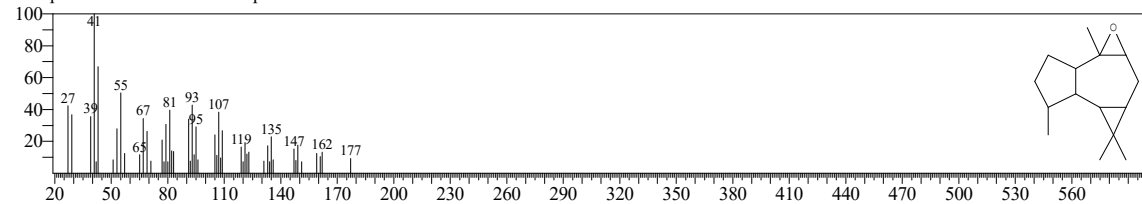

Hit#:6 Entry:257480 Library:W11N17MAIN1.lib

SI:83 Formula:C15H24O CAS:0-00-0 MolWeight:220 RetIndex:1281

CompName:Isoaromadendrene epoxide

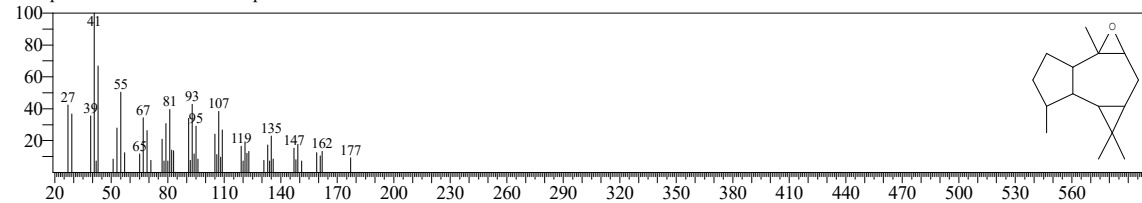

Hit#:7 Entry:1031 Library:FFNSC 1.2.lib

SI:83 Formula:C15H24 CAS:489-39-4 MolWeight:204 RetIndex:1438

CompName:Aromadendrene; Cycloprop[e]azulene <1H-, decahydro-, 1,1,7-trimethyl-, 4-methylene-, (1aR,4aR,7R,7aR,7bS)->

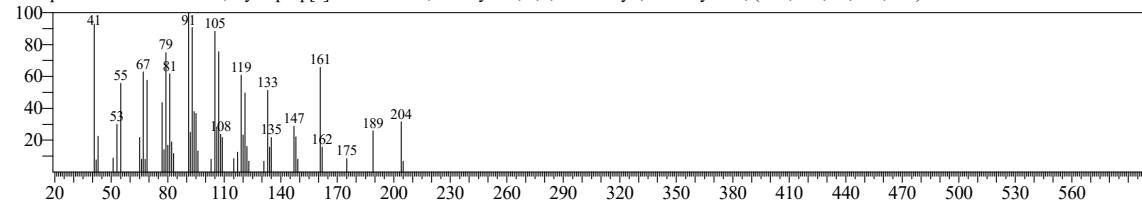

Hit#:8 Entry:903 Library:FFNSC 1.2.lib

SI:82 Formula:C15H24O CAS:6750-60-3 MolWeight:220 RetIndex:1576

CompName:Spathulenol; Cycloprop[e]azulen-7-ol <decahydro-, 1,1,7-trimethyl-, 4-methylene-, 1H->

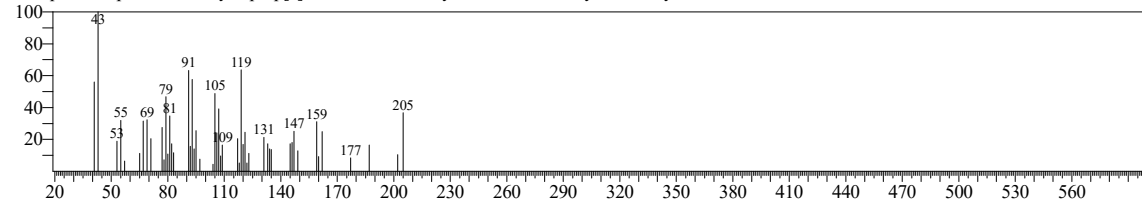

<< Target >>

Line#:41 R.Time:38.980(Scan#:7237) Retention Index:1637 MassPeaks:311

RawMode:Averaged 38.920-39.050(7225-7251) BasePeak:81.05(1015)

BG Mode:Calc. from Peak Group 1 - Event 1 Scan

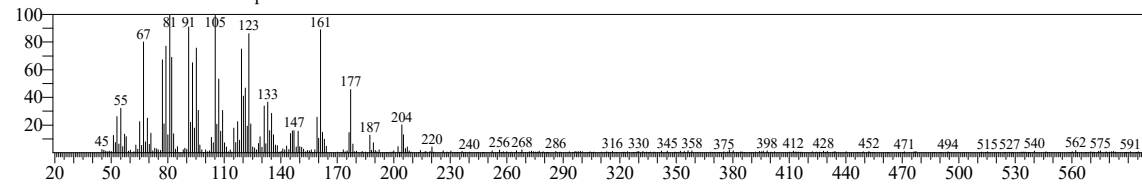

Hit#:9 Entry:204051 Library:W11N17MAIN1.lib

SI:82 Formula:C15H24 CAS:25246-27-9 MolWeight:204 RetIndex:1386

CompName:Alloaromadendrene

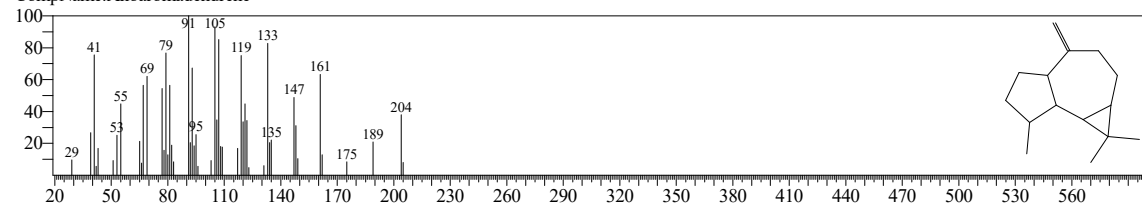

Hit#:10 Entry:203867 Library:W11N17MAIN1.lib

SI:82 Formula:C15H24 CAS:22567-17-5 MolWeight:204 RetIndex:1461

CompName:Azulene, 1,2,3,3a,4,5,6,7-octahydro-1,4-dimethyl-7-(1-methylethenyl)-, [1R-(1.alpha.,3a.beta.,4.alpha.,7.beta.)]-

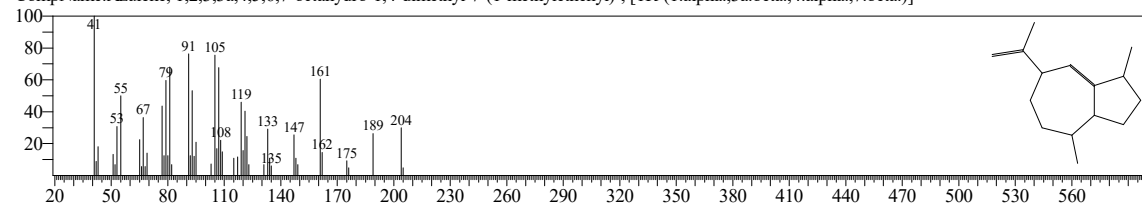

<< Target >>

Line#:42 R.Time:39.295(Scan#:7300) Retention Index:1646 MassPeaks:345

RawMode:Averaged 39.165-39.490(7274-7339) BasePeak:108.10(14937)

BG Mode:Calc. from Peak Group 1 - Event 1 Scan

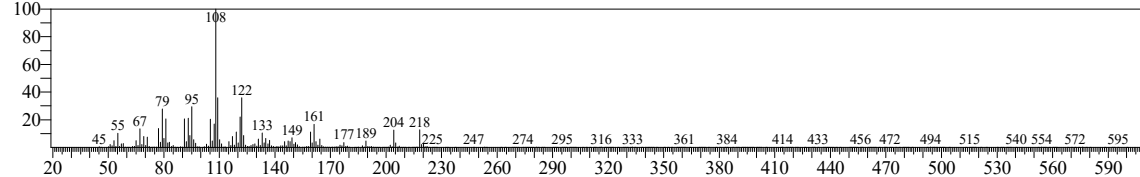

Hit#:1 Entry:1082 Library:FFNSC 1.2.lib

SI:79 Formula:C15 H24 CAS:20085-93-2 MolWeight:204 RetIndex:1445

CompName:Seychellene; Naphthalene <1,6-methano-, decahydro-, 1,4,8a-trimethyl-, 9-methylene-, (1S,4S,4aS,6R,8aS)->

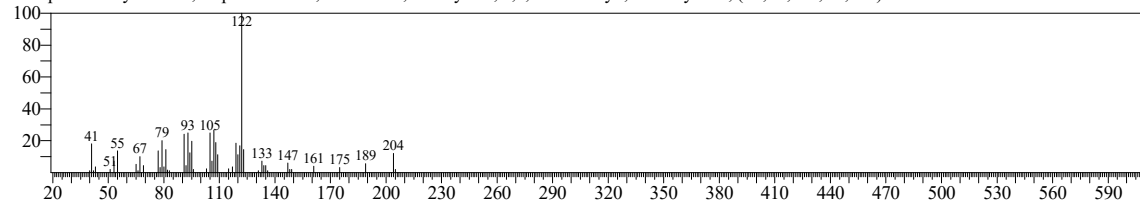

Hit#:2 Entry:204402 Library:W11N17MAIN1.lib

SI:78 Formula:C15H24 CAS:20085-93-2 MolWeight:204 RetIndex:1275

CompName:1,6-Methanonaphthalene, decahydro-1,4,8a-trimethyl-9-methylene-, (1S,4S,4aS,6R,8aS)-(-)

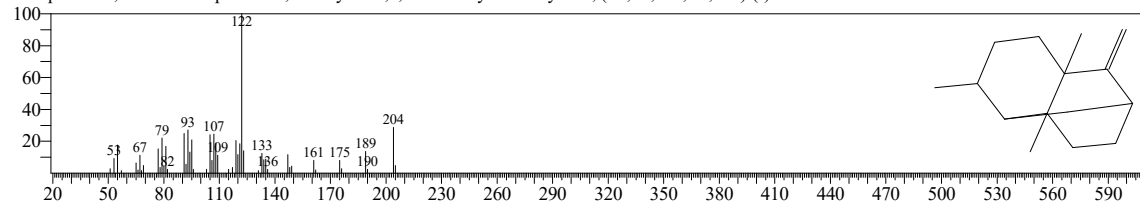

Hit#:3 Entry:204673 Library:W11N17MAIN1.lib

SI:78 Formula:C15H24 CAS:65128-08-7 MolWeight:204 RetIndex:1450

CompName:1,4,6-Trimethyl-1,2,3,3a,4,7,8,8a-octahydro-4,7-ethanoazulene

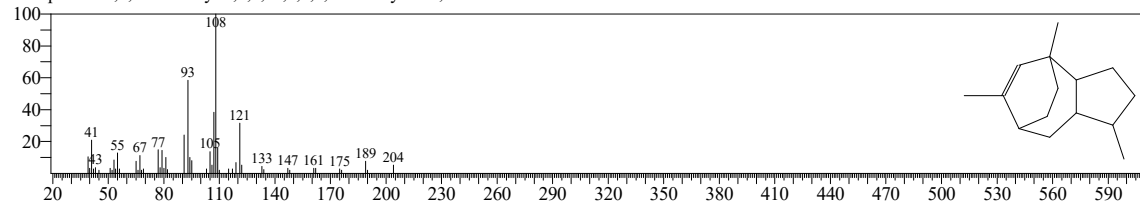

Hit#:4 Entry:75342 Library:NIST17.lib

SI:78 Formula:C15H24 CAS:3650-28-0 MolWeight:204 RetIndex:1339

CompName:1,4-Methano-1H-indene, octahydro-4-methyl-8-methylene-7-(1-methylethyl)-, [1S-(1.alpha.,3a.beta.,4.alpha.,7.alpha.,7a.beta.)]-

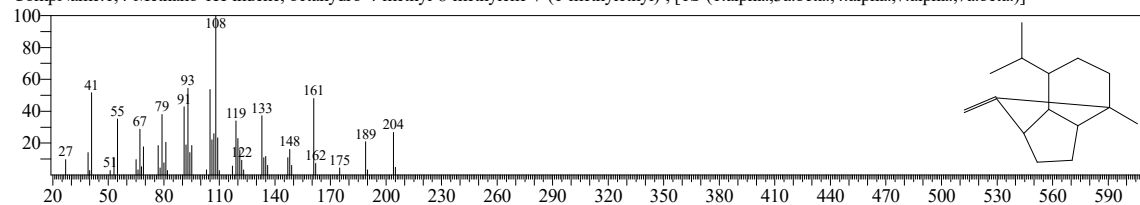

<< Target >>

Line#:42 R.Time:39.295(Scan#:7300) Retention Index:1646 MassPeaks:345

RawMode:Averaged 39.165-39.490(7274-7339) BasePeak:108.10(14937)

BG Mode:Calc. from Peak Group 1 - Event 1 Scan

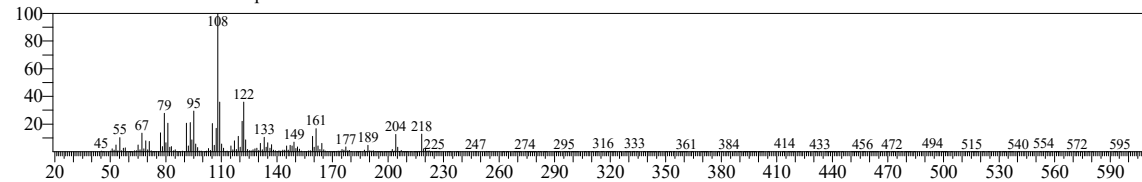

Hit#:5 Entry:204563 Library:W11N17MAIN1.lib

SI:78 Formula:C15H24 CAS:3650-28-0 MolWeight:204 RetIndex:1339

CompName:1,4-Methano-1H-indene, octahydro-4-methyl-8-methylene-7-(1-methylethyl)-, [1S-(1.alpha.,3a.beta.,4.alpha.,7.alpha.,7a.beta.)]-

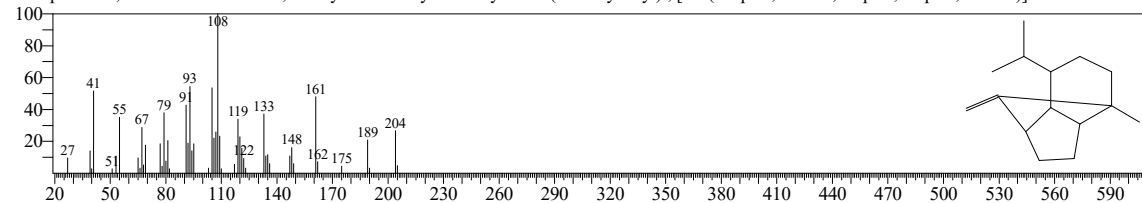

Hit#:6 Entry:75343 Library:NIST17.lib

SI:78 Formula:C15H24 CAS:65128-08-7 MolWeight:204 RetIndex:1450

CompName:1,4,6-Trimethyl-1,2,3,3a,4,7,8,8a-octahydro-4,7-ethanoazulene

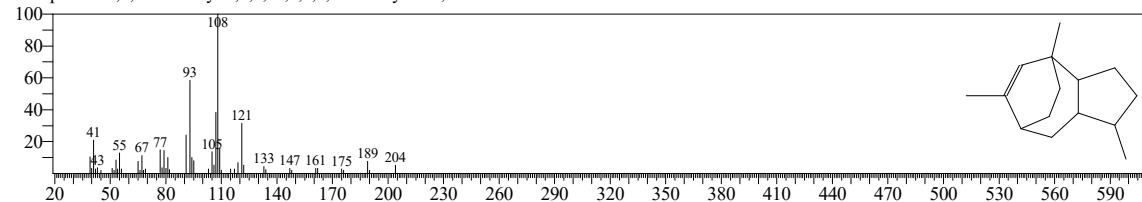

Hit#:7 Entry:75133 Library:NIST17.lib

SI:78 Formula:C15H24 CAS:20085-93-2 MolWeight:204 RetIndex:1275

CompName:Seychellene

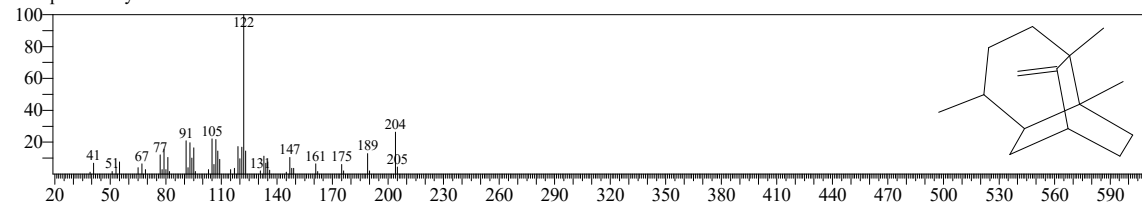

Hit#:8 Entry:204401 Library:W11N17MAIN1.lib

SI:78 Formula:C15H24 CAS:20085-93-2 MolWeight:204 RetIndex:1275

CompName:Seychellene

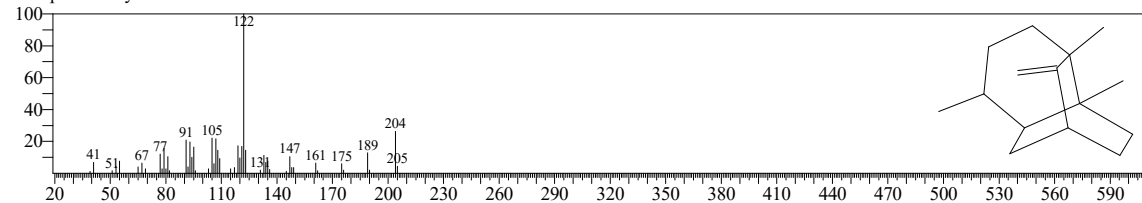

<< Target >>

Line#:42 R.Time:39.295(Scan#:7300) Retention Index:1646 MassPeaks:345

RawMode:Averaged 39.165-39.490(7274-7339) BasePeak:108.10(14937)

BG Mode:Calc. from Peak Group 1 - Event 1 Scan

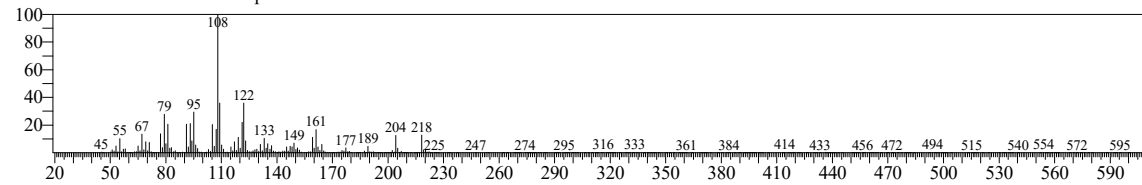

Hit#:9 Entry:146663 Library:NIST17.lib

SI:78 Formula:C19H28O CAS:25824-61-7 MolWeight:272 RetIndex:1922

CompName:Androst-2-en-1-one, (5.alpha.)-

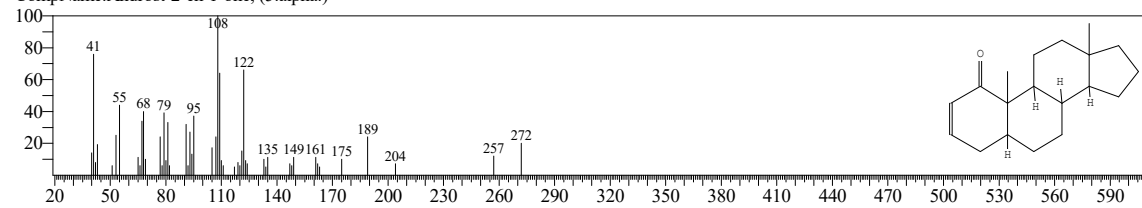

Hit#:10 Entry:441362 Library:W11N17MAIN1.lib

SI:78 Formula:C19H28O CAS:25824-61-7 MolWeight:272 RetIndex:1922

CompName:Androst-2-en-1-one, (5.alpha.)-

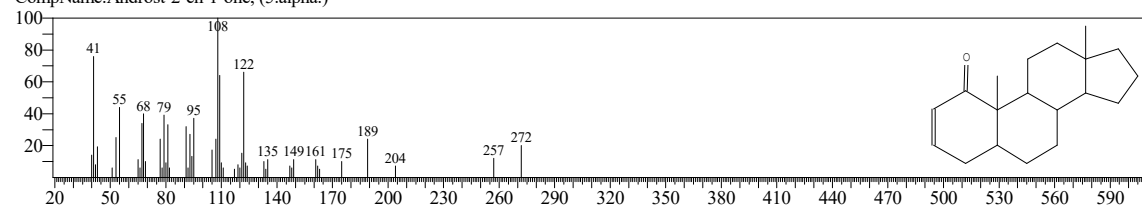

<< Target >>

Line#:43 R.Time:39.625(Scan#:7366) Retention Index:1654 MassPeaks:310

RawMode:Averaged 39.570-39.690(7355-7379) BasePeak:91.05(614)

BG Mode:Calc. from Peak Group 1 - Event 1 Scan

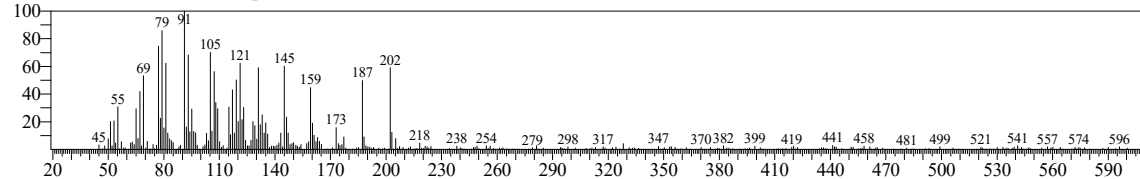

Hit#:1 Entry:257543 Library:W11N17MAIN1.lib

SI:83 Formula:C15H24O CAS:38142-56-2 MolWeight:220 RetIndex:1663

CompName:6-Methyl-2-(4-methylcyclohex-3-en-1-yl)hepta-1,5-dien-4-ol

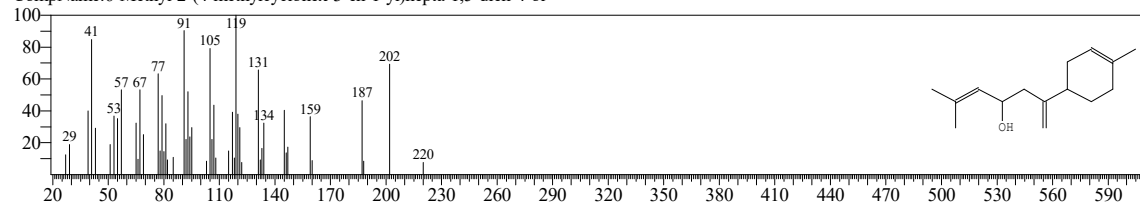

Hit#:2 Entry:91652 Library:NIST17.lib

SI:83 Formula:C15H24O CAS:38142-56-2 MolWeight:220 RetIndex:1663

CompName:6-Methyl-2-(4-methylcyclohex-3-en-1-yl)hepta-1,5-dien-4-ol

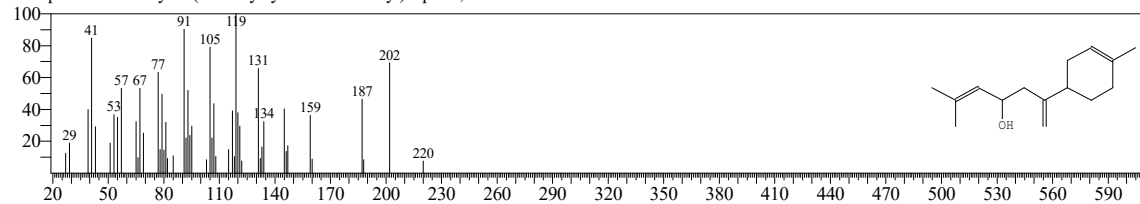

Hit#:3 Entry:257464 Library:W11N17MAIN1.lib

SI:83 Formula:C15H24O CAS:22387-74-2 MolWeight:220 RetIndex:1750

CompName:(E)-2-((8R,8aS)-8,8a-Dimethyl-3,4,6,7,8,8a-hexahydronaphthalen-2(1H)-ylidene)propan-1-ol

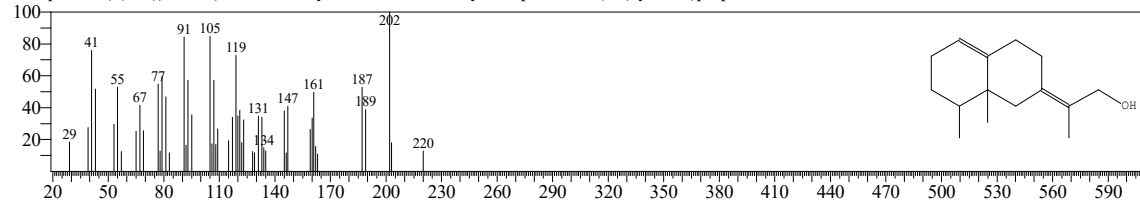

Hit#:4 Entry:91622 Library:NIST17.lib

SI:83 Formula:C15H24O CAS:515-20-8 MolWeight:220 RetIndex:1711

CompName:2-((2R,4aR,8aS)-4a-Methyl-8-methylenedecahydronaphthalen-2-yl)prop-2-en-1-ol

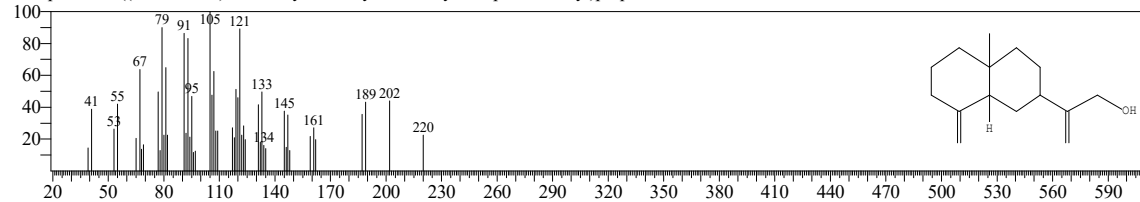

<< Target >>

Line#:43 R.Time:39.625(Scan#:7366) Retention Index:1654 MassPeaks:310

RawMode:Averaged 39.570-39.690(7355-7379) BasePeak:91.05(614)

BG Mode:Calc. from Peak Group 1 - Event 1 Scan

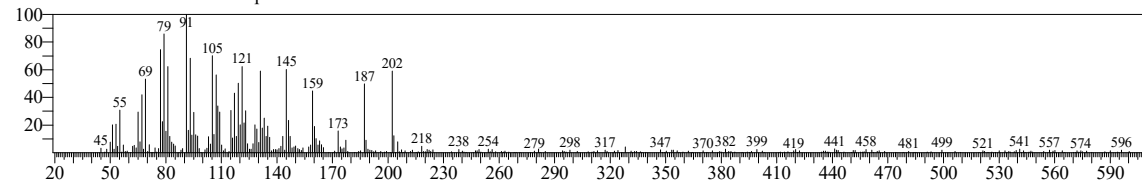

Hit#:5 Entry:91726 Library:NIST17.lib

SI:83 Formula:C15H24O CAS:22387-74-2 MolWeight:220 RetIndex:1750

CompName:(E)-2-((8R,8aS)-8,8a-Dimethyl-3,4,6,7,8,8a-hexahydronaphthalen-2(1H)-ylidene)propan-1-ol

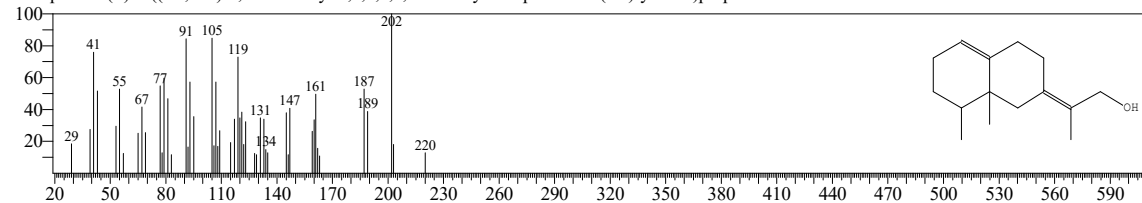

Hit#:6 Entry:257437 Library:W11N17MAIN1.lib

SI:83 Formula:C15H24O CAS:515-20-8 MolWeight:220 RetIndex:1711

CompName:2-((2R,4aR,8aS)-4a-Methyl-8-methylenedecahydronaphthalen-2-yl)prop-2-en-1-ol

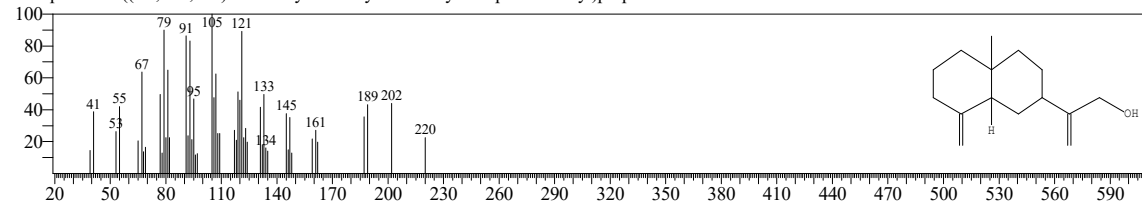

Hit#:7 Entry:257873 Library:W11N17MAIN1.lib

SI:83 Formula:C15H24O CAS:81968-62-9 MolWeight:220 RetIndex:1699

CompName:(1R,7S,E)-7-Isopropyl-4,10-dimethylenecyclodec-5-enol

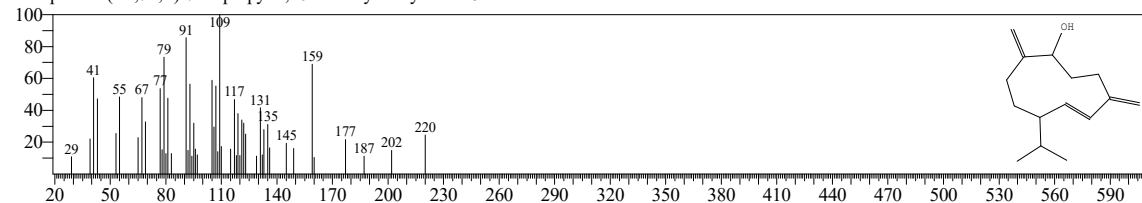

Hit#:8 Entry:153172 Library:W11N17MAIN2.lib

SI:83 Formula:C20H30O5 CAS:5508-58-7 MolWeight:350 RetIndex:2944

CompName:Andrographolide

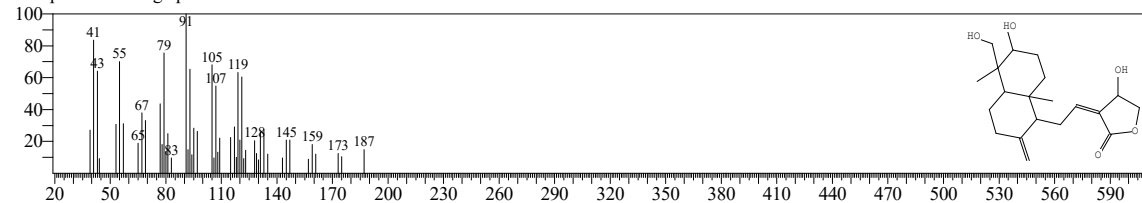



<< Target >>

Line#:43 R.Time:39.625(Scan#:7366) Retention Index:1654 MassPeaks:310

RawMode:Averaged 39.570-39.690(7355-7379) BasePeak:91.05(614)

BG Mode:Calc. from Peak Group 1 - Event 1 Scan

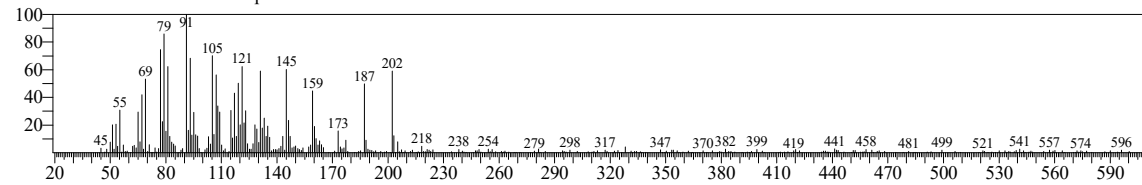

Hit#:9 Entry:91640 Library:NIST17.lib

SI:83 Formula:C<sub>15</sub>H<sub>24</sub>O CAS:81968-62-9 MolWeight:220 RetIndex:1699

CompName:(1R,7S,E)-7-Isopropyl-4,10-dimethylenecyclodec-5-enol

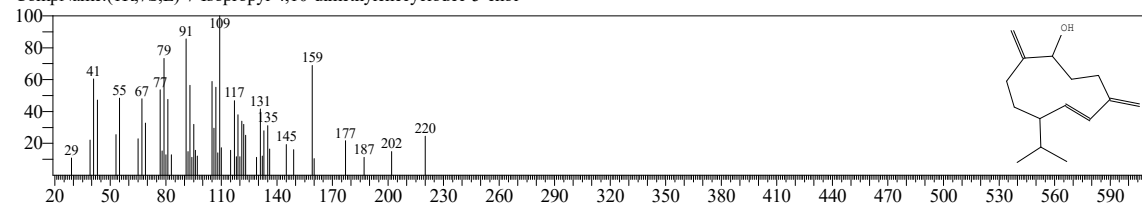

Hit#:10 Entry:228618 Library:NIST17.lib

SI:83 Formula:C<sub>20</sub>H<sub>30</sub>O<sub>5</sub> CAS:5508-58-7 MolWeight:350 RetIndex:2944

CompName:Andrographolide

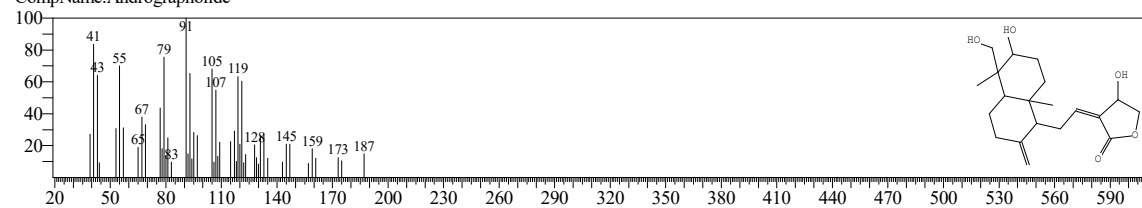

<< Target >>

Line#:44 R.Time:39.885(Scan#:7418) Retention Index:1661 MassPeaks:293

RawMode:Averaged 39.825-39.930(7406-7427) BasePeak:81.10(945)

BG Mode:Calc. from Peak Group 1 - Event 1 Scan

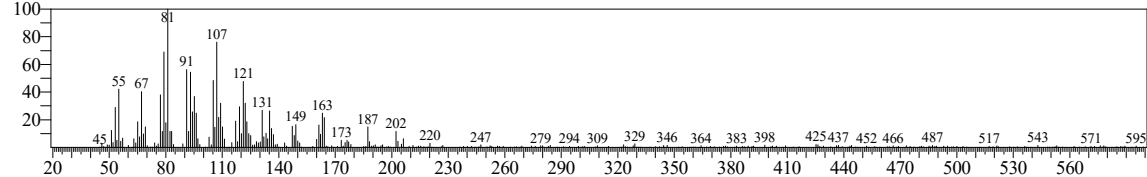

Hit#:1 Entry:204712 Library:W11N17MAIN1.lib

SI:83 Formula:C15H24 CAS:0-00-0 MolWeight:204 RetIndex:1456

CompName:Bicyclo[5.3.0]decane, 2-methylene-5-(1-methylvinyl)-8-methyl-

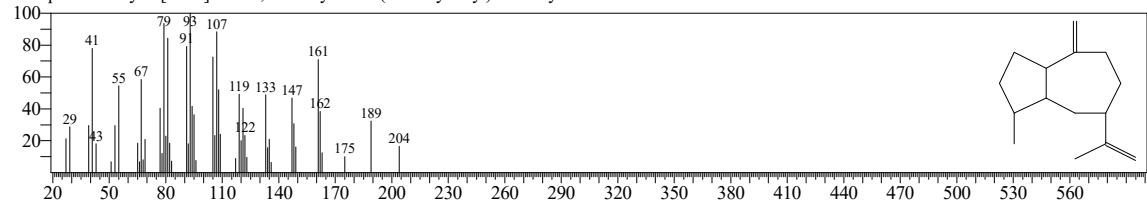

Hit#:2 Entry:75024 Library:NIST17.lib

SI:83 Formula:C15H24 CAS:0-00-0 MolWeight:204 RetIndex:1456

CompName:Bicyclo[5.3.0]decane, 2-methylene-5-(1-methylvinyl)-8-methyl-

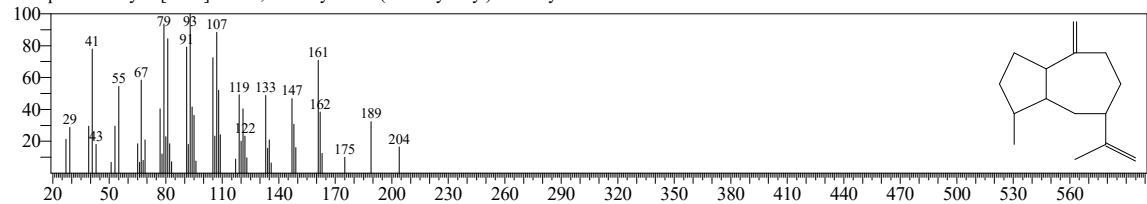

Hit#:3 Entry:204713 Library:W11N17MAIN1.lib

SI:83 Formula:C15H24 CAS:0-00-0 MolWeight:204 RetIndex:1456

CompName:Bicyclo[5.3.0]decane, 2-methylene-5-(1-methylvinyl)-8-methyl-

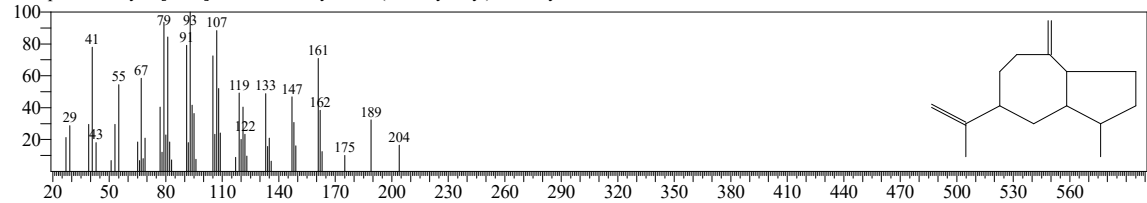

Hit#:4 Entry:74998 Library:NIST17.lib

SI:83 Formula:C15H24 CAS:0-00-0 MolWeight:204 RetIndex:1433

CompName:(-)-Isoaromadendrene-(V)

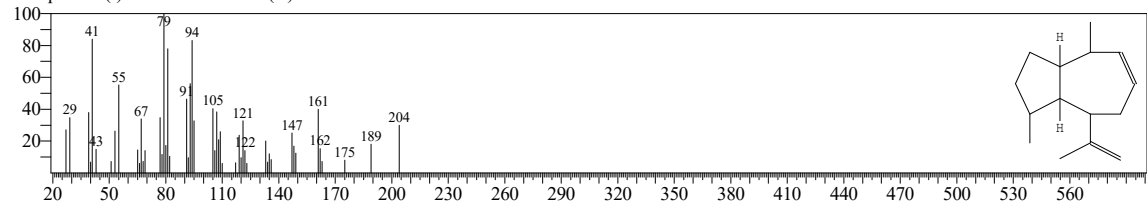

<< Target >>

Line#:44 R.Time:39.885(Scan#:7418) Retention Index:1661 MassPeaks:293

RawMode:Averaged 39.825-39.930(7406-7427) BasePeak:81.10(945)

BG Mode:Calc. from Peak Group 1 - Event 1 Scan

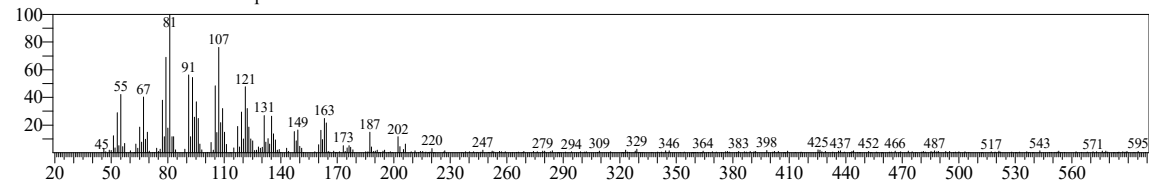

Hit#:5 Entry:204840 Library:W11N17MAIN1.lib

SI:83 Formula:C15H24 CAS:0-00-0 MolWeight:204 RetIndex:1433

CompName:(-)-Isoaromadendrene-(V)

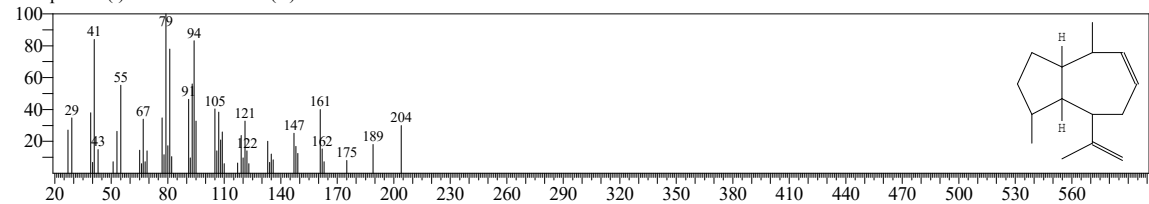

Hit#:6 Entry:204742 Library:W11N17MAIN1.lib

SI:83 Formula:C15H24 CAS:3691-11-0 MolWeight:204 RetIndex:1490

CompName:delta.-Guaiene

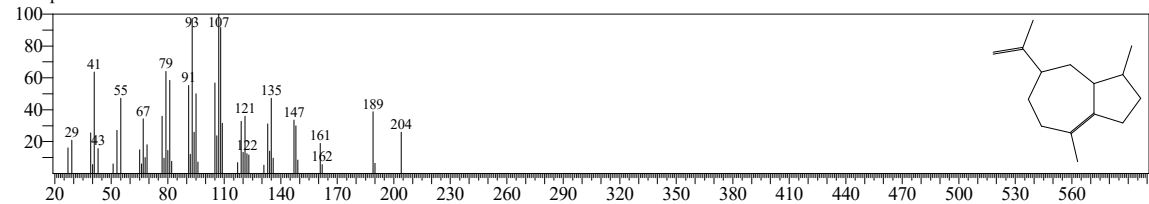

Hit#:7 Entry:299392 Library:W11N17MAIN1.lib

SI:83 Formula:C15H20O2 CAS:28290-35-9 MolWeight:232 RetIndex:1725

CompName:2(3H)-Benzofuranone, 6-ethenylhexahydro-6-methyl-3-methylene-7-(1-methylethenyl)-, [3aS-(3a.alpha.,6.alpha.,7.beta.,7a.beta.)]-

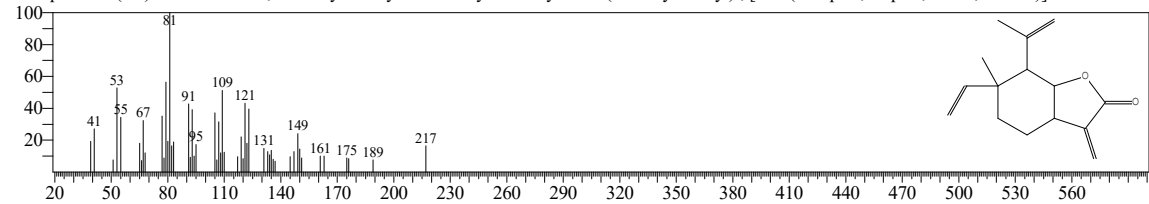

Hit#:8 Entry:75075 Library:NIST17.lib

SI:83 Formula:C15H24 CAS:3691-11-0 MolWeight:204 RetIndex:1490

CompName:Azulene, 1,2,3,5,6,7,8,8a-octahydro-1,4-dimethyl-7-(1-methylethenyl)-, [1S-(1.alpha.,7.alpha.,8a.beta.)]-

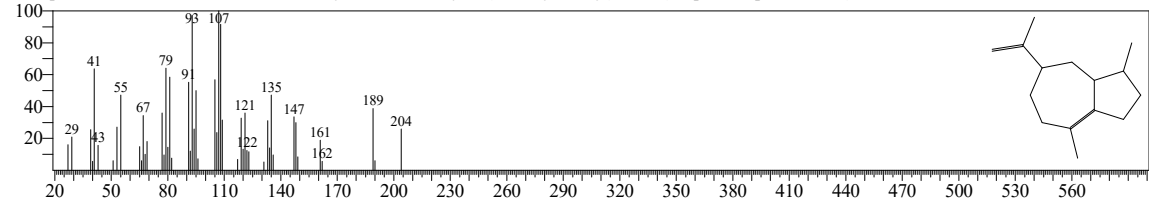

<< Target >>

Line#:44 R.Time:39.885(Scan#:7418) Retention Index:1661 MassPeaks:293

RawMode:Averaged 39.825-39.930(7406-7427) BasePeak:81.10(945)

BG Mode:Calc. from Peak Group 1 - Event 1 Scan

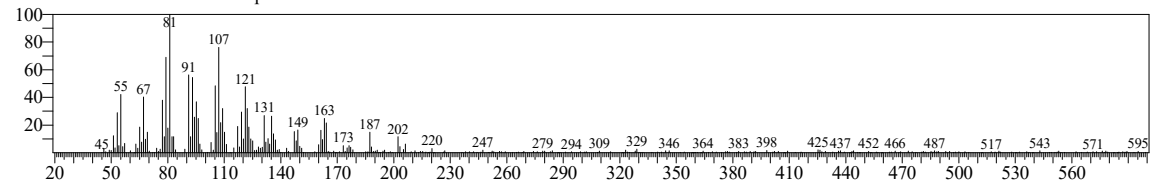

Hit#:9 Entry:104290 Library:NIST17.lib

SI:83 Formula:C15H20O2 CAS:28290-35-9 MolWeight:232 RetIndex:1725

CompName:2(3H)-Benzofuranone, 6-ethenylhexahydro-6-methyl-3-methylene-7-(1-methylethenyl)-, [3aS-(3a.alpha.,6.alpha.,7.beta.,7a.beta.)]-

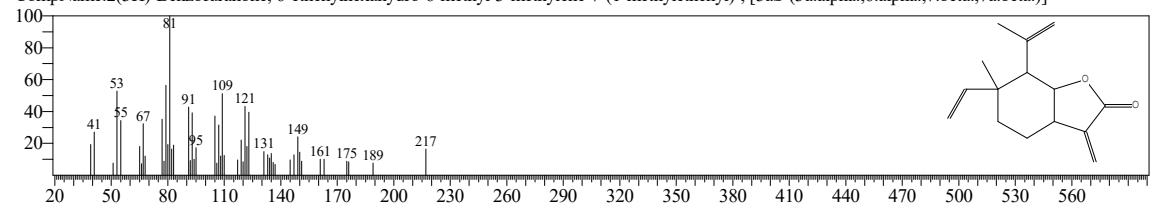

Hit#:10 Entry:204743 Library:W11N17MAIN1.lib

SI:83 Formula:C15H24 CAS:3691-11-0 MolWeight:204 RetIndex:1490

CompName:Azulene, 1,2,3,5,6,7,8,8a-octahydro-1,4-dimethyl-7-(1-methylethenyl)-, [1S-(1.alpha.,7.alpha.,8a.beta.)]-

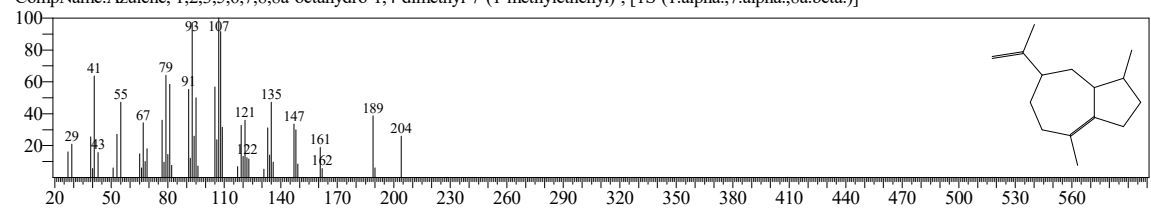

<< Target >>

Line#:45 R.Time:39.990(Scan#:7439) Retention Index:1664 MassPeaks:306

RawMode:Averaged 39.930-40.125(7427-7466) BasePeak:145.10(7144)

BG Mode:Calc. from Peak Group 1 - Event 1 Scan

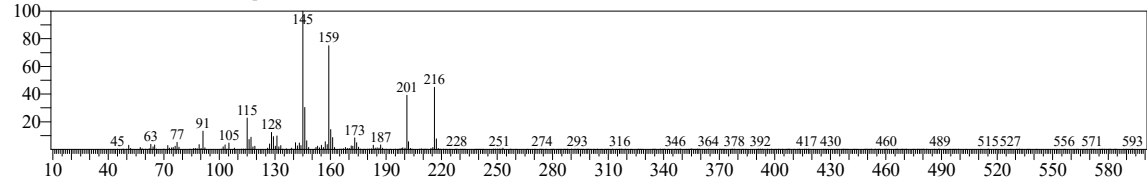

Hit#:1 Entry:243221 Library:W11N17MAIN1.lib

SI:74 Formula:C14H16O2 CAS:17471-49-7 MolWeight:216 RetIndex:1778

CompName:2,3-Naphthalenedione, 1,4-dihydro-1,1,4,4-tetramethyl-

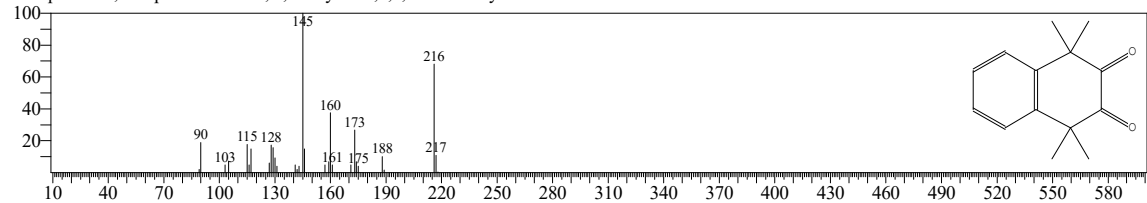

Hit#:2 Entry:87446 Library:NIST17.lib

SI:74 Formula:C14H16O2 CAS:17471-49-7 MolWeight:216 RetIndex:1778

CompName:2,3-Naphthalenedione, 1,4-dihydro-1,1,4,4-tetramethyl-

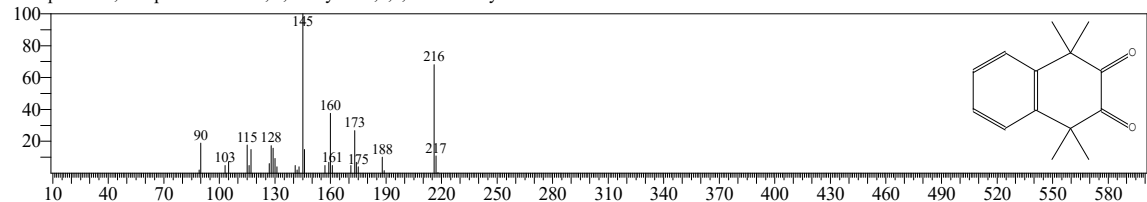

Hit#:3 Entry:243220 Library:W11N17MAIN1.lib

SI:74 Formula:C14H16O2 CAS:17471-49-7 MolWeight:216 RetIndex:1778

CompName:2,3-Naphthalenedione, 1,4-dihydro-1,1,4,4-tetramethyl-

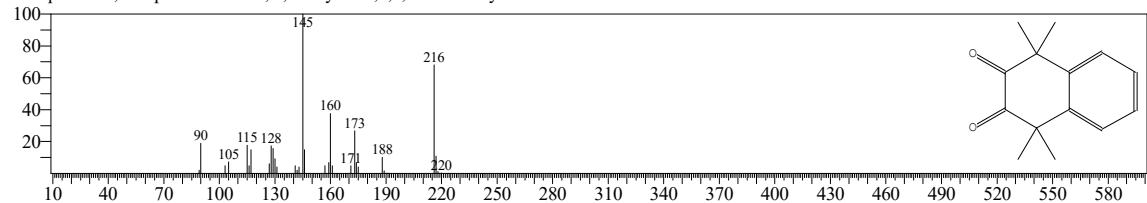

Hit#:4 Entry:243083 Library:W11N17MAIN1.lib

SI:73 Formula:C14H16O2 CAS:10444-04-9 MolWeight:216 RetIndex:1744

CompName:4-(3,5-Dimethyl-2-benzofuranyl)-2-butanone

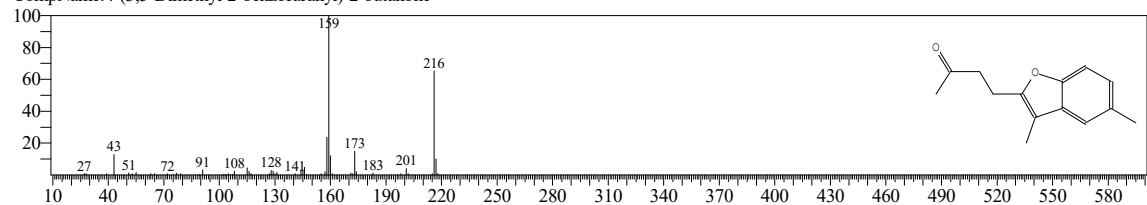

<< Target >>

Line#:45 R.Time:39.990(Scan#:7439) Retention Index:1664 MassPeaks:306

RawMode:Averaged 39.930-40.125(7427-7466) BasePeak:145.10(7144)

BG Mode:Calc. from Peak Group 1 - Event 1 Scan

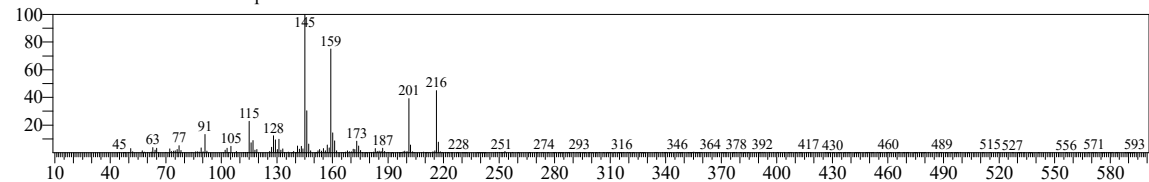

Hit#:5 Entry:87453 Library:NIST17.lib

SI:73 Formula:C14H16O2 CAS:10444-04-9 MolWeight:216 RetIndex:1744

CompName:4-(3,5-Dimethyl-2-benzofuranyl)-2-butanone

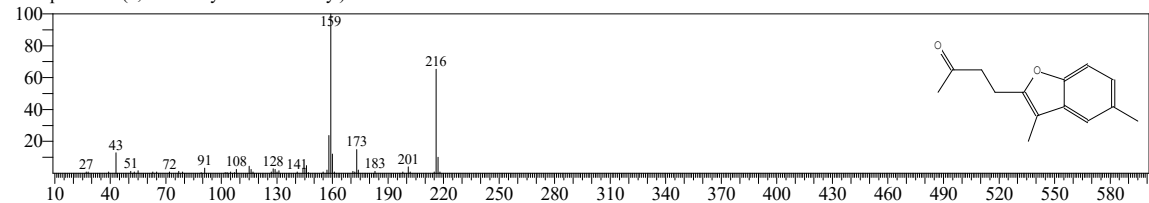

Hit#:6 Entry:84319 Library:W11N17MAIN1.lib

SI:70 Formula:C12H16 CAS:4175-54-6 MolWeight:160 RetIndex:1289

CompName:Naphthalene, 1,2,3,4-tetrahydro-1,4-dimethyl-

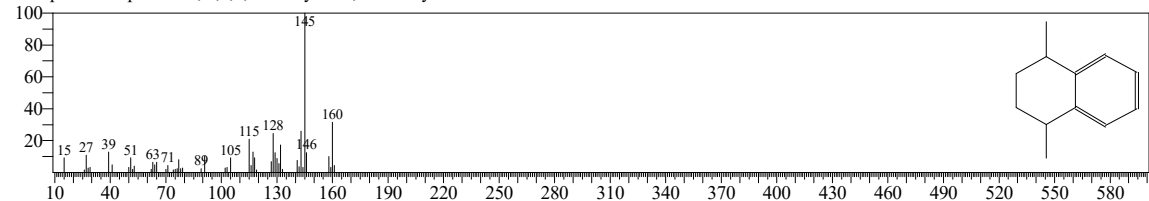

Hit#:7 Entry:87516 Library:NIST17.lib

SI:70 Formula:C15H20O CAS:16982-01-7 MolWeight:216 RetIndex:1744

CompName:Cuparene

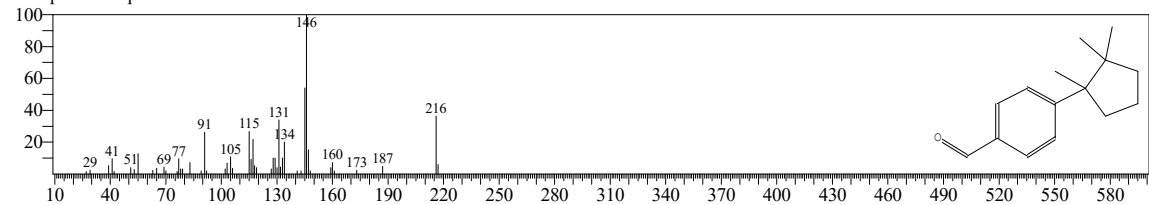

Hit#:8 Entry:243677 Library:W11N17MAIN1.lib

SI:70 Formula:C15H20O CAS:16982-01-7 MolWeight:216 RetIndex:1744

CompName:Cuparene

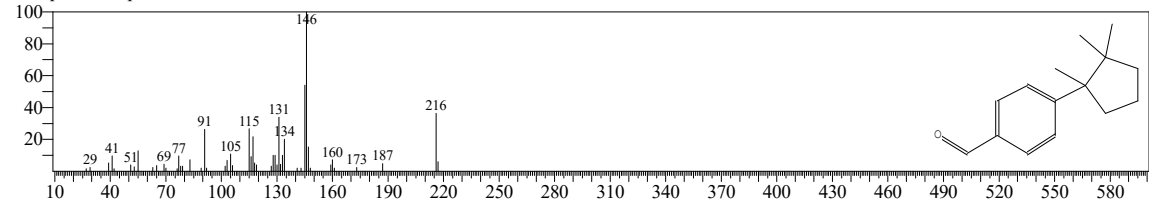

<< Target >>

Line#:45 R.Time:39.990(Scan#:7439) Retention Index:1664 MassPeaks:306

RawMode:Averaged 39.930-40.125(7427-7466) BasePeak:145.10(7144)

BG Mode:Calc. from Peak Group 1 - Event 1 Scan

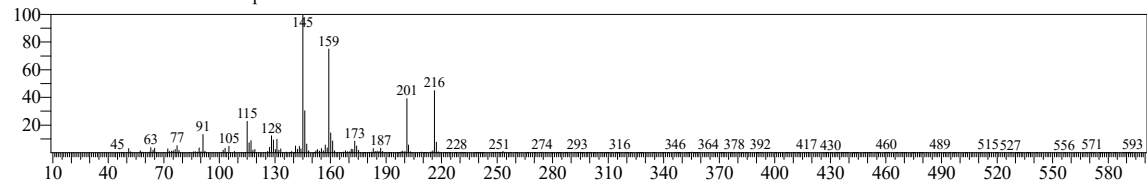

Hit#:9 Entry:243927 Library:W11N17MAIN1.lib

SI:70 Formula:C16H24 CAS:2084-69-7 MolWeight:216 RetIndex:1610

CompName:1,1,3,4,4,6-Hexamethyl-1,2,3,4-tetrahydronaphthalene

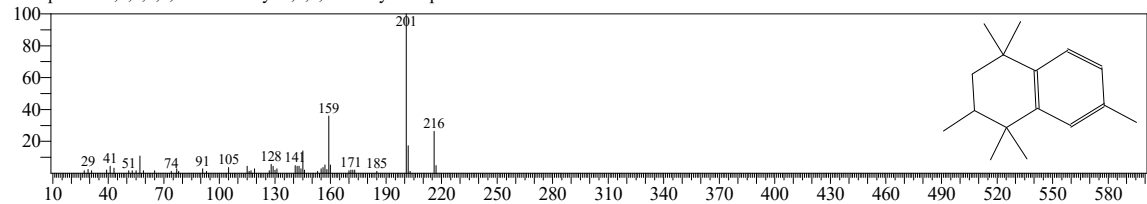

Hit#:10 Entry:243926 Library:W11N17MAIN1.lib

SI:70 Formula:C16H24 CAS:2084-69-7 MolWeight:216 RetIndex:1610

CompName:Naphthalene, 1,2,3,4-tetrahydro-1,1,2,4,4,7-hexamethyl-

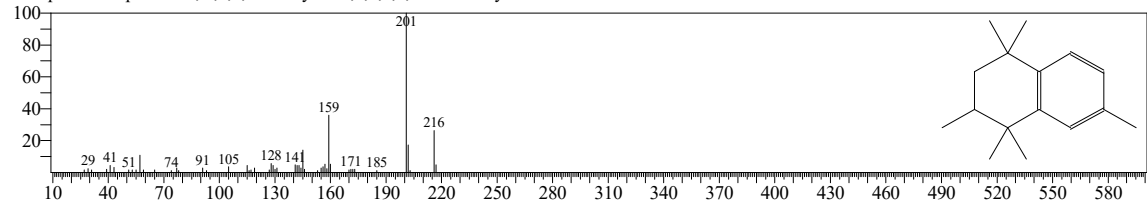

<< Target >>

Line#:46 R.Time:40.365(Scan#:7514) Retention Index:1674 MassPeaks:289

RawMode:Averaged 40.300-40.410(7501-7523) BasePeak:91.10(1764)

BG Mode:Calc. from Peak Group 1 - Event 1 Scan

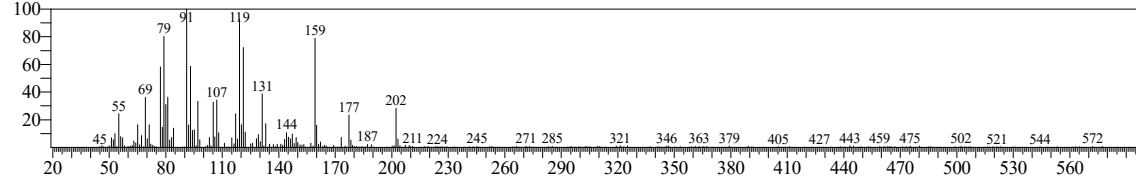

Hit#:1 Entry:257430 Library:W11N17MAIN1.lib

SI:82 Formula:C15H24O CAS:119120-23-9 MolWeight:220 RetIndex:1636

CompName:Eudesma-4(15),7-dien-1.beta. -ol

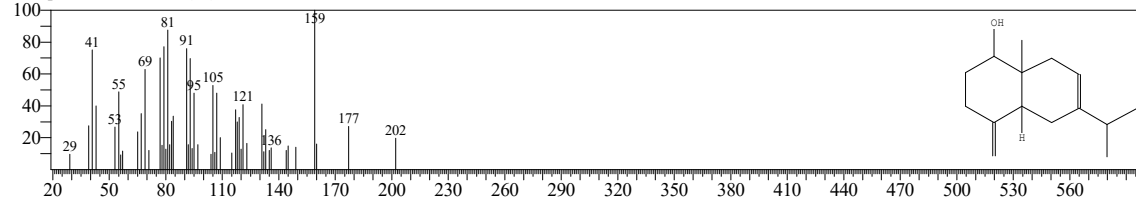

Hit#:2 Entry:91705 Library:NIST17.lib

SI:82 Formula:C15H24O CAS:119120-23-9 MolWeight:220 RetIndex:1636

CompName:Eudesma-4(15),7-dien-1.beta. -ol

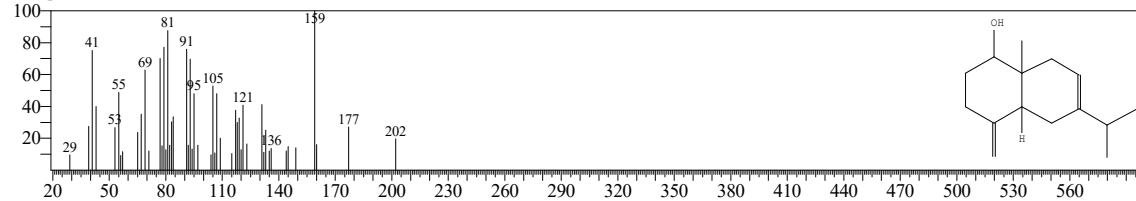

Hit#:3 Entry:228618 Library:NIST17.lib

SI:80 Formula:C20H30O5 CAS:5508-58-7 MolWeight:350 RetIndex:2944

CompName:Andrographolide

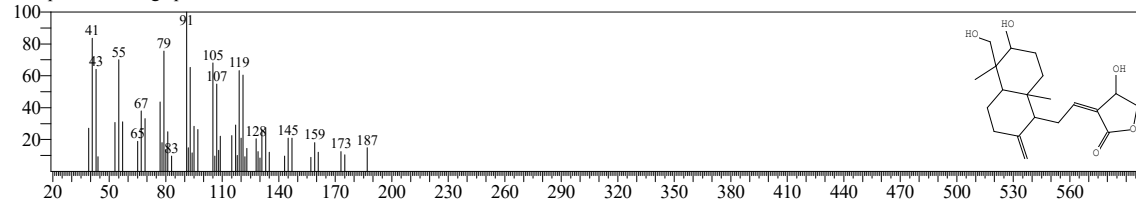

Hit#:4 Entry:153172 Library:W11N17MAIN2.lib

SI:80 Formula:C20H30O5 CAS:5508-58-7 MolWeight:350 RetIndex:2944

CompName:Andrographolide

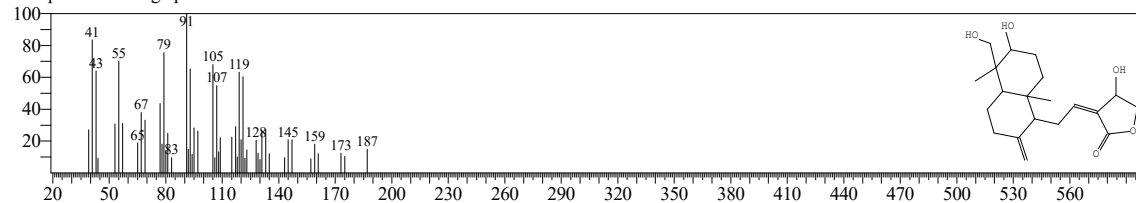



<< Target >>

Line#:46 R.Time:40.365(Scan#:7514) Retention Index:1674 MassPeaks:289

RawMode:Averaged 40.300-40.410(7501-7523) BasePeak:91.10(1764)

BG Mode:Calc. from Peak Group 1 - Event 1 Base

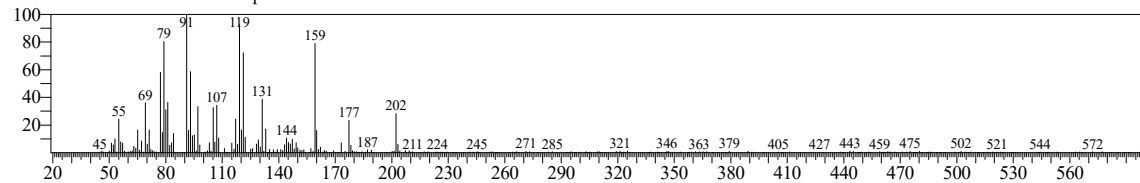

Hit#:5 Entry:903 Library:FFNSC 1.2.lib

SI:78 Formula:C15H24O CAS:6750-60-3 MolWeight:220 RetIndex:1576

CompName:Spathulenol; Cycloprop[e]azulen-7-ol <decahydro-, 1,1,7-trimethyl-, 4-methylene-, 1H->

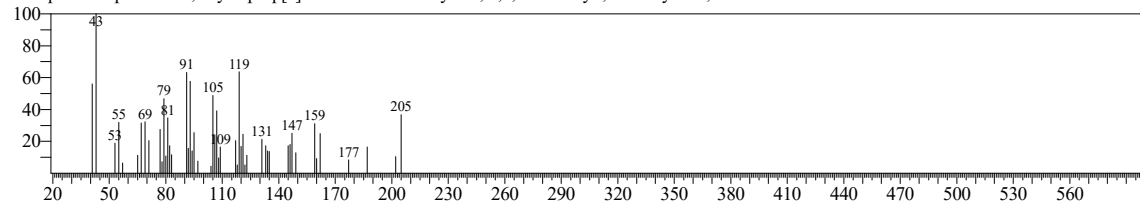

Hit#:6 Entry:91652 Library:NIST17.lib

SI:78 Formula:C15H24O CAS:38142-56-2 MolWeight:220 RetIndex:1663

CompName:6-Methyl-2-(4-methylcyclohex-3-en-1-yl)hepta-1,5-dien-4-ol

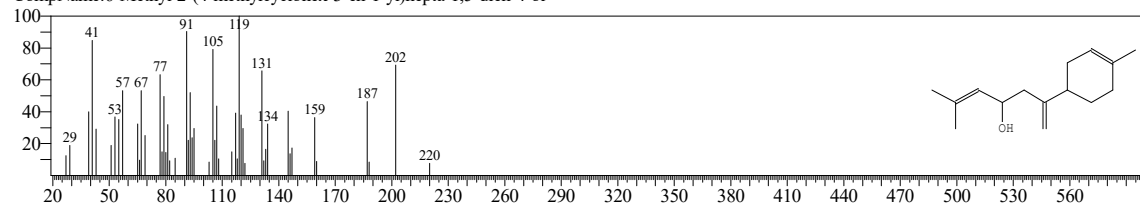

Hit#:7 Entry:257543 Library:W11N17MAIN1.lib

SI:78 Formula:C15H24O CAS:38142-56-2 MolWeight:220 RetIndex:1663

CompName:6-Methyl-2-(4-methylcyclohex-3-en-1-yl)hepta-1,5-dien-4-ol

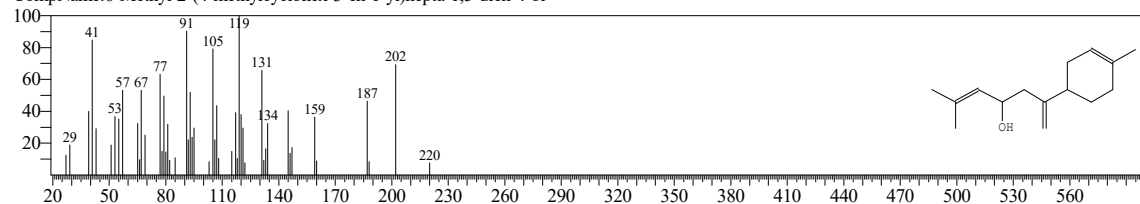

Hit#:8 Entry:257453 Library:W11N17MAIN1.lib

SI:77 Formula:C15H24O CAS:77171-55-2 MolWeight:220 RetIndex:1536

CompName:(-)-Spathulenol

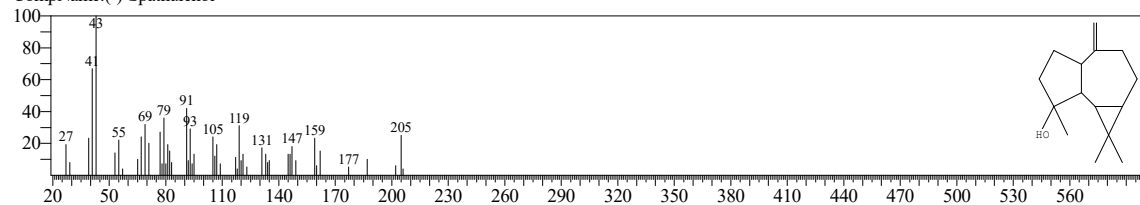

<< Target >>

Line#:46 R.Time:40.365(Scan#:7514) Retention Index:1674 MassPeaks:289

RawMode:Averaged 40.300-40.410(7501-7523) BasePeak:91.10(1764)

BG Mode:Calc. from Peak Group 1 - Event 1 Scan

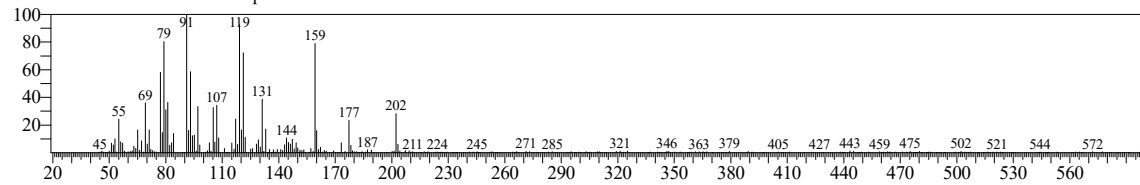

Hit#:9 Entry:197739 Library:W11N17MAIN1.lib

SI:76 Formula:C15H22 CAS:212394-95-1 MolWeight:202 RetIndex:1451

CompName:(3R,4aS,8aS)-8a-Methyl-5-methylene-3-(prop-1-en-2-yl)-1,2,3,4,4a,5,6,8a-octahydronaphthalene

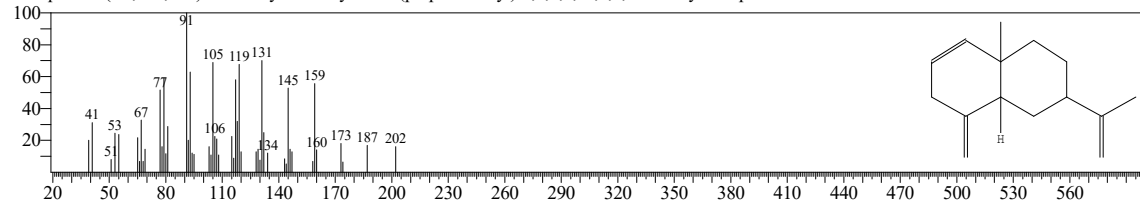

Hit#:10 Entry:213942 Library:W11N17MAIN2.lib

SI:76 Formula:C25H42O2 CAS:66990-32-7 MolWeight:374 RetIndex:2897

CompName:10-12-Pentacosadiynoic acid

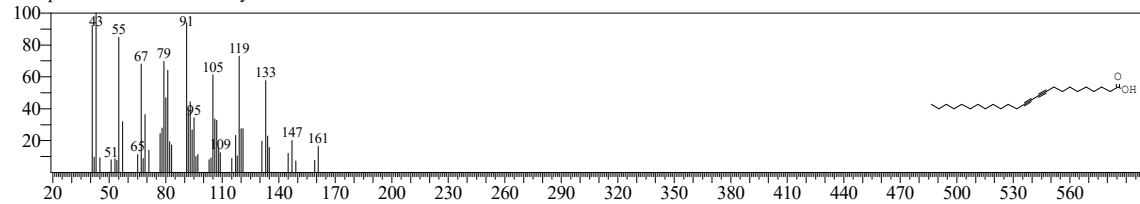

<< Target >>

Line#:47 R.Time:40.440(Scan#:7529) Retention Index:1676 MassPeaks:258

RawMode:Averaged 40.410-40.540(7523-7549) BasePeak:109.10(326)

BG Mode:Calc. from Peak Group 1 - Event 1 Scan

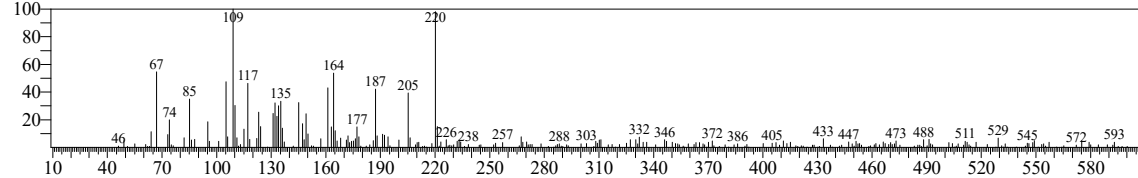

Hit#:1 Entry:91492 Library:NIST17.lib

SI:57 Formula:C<sub>14</sub>H<sub>20</sub>O<sub>2</sub> CAS:2460-77-7 MolWeight:220 RetIndex:1633

CompName:2,5-di-tert-Butyl-1,4-benzoquinone

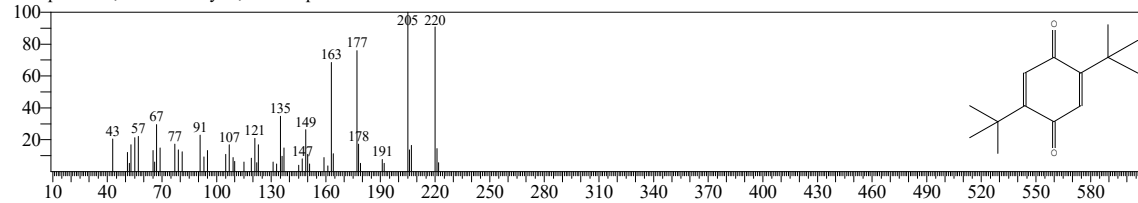

Hit#:2 Entry:257025 Library:W11N17MAIN1.lib

SI:57 Formula:C<sub>14</sub>H<sub>20</sub>O<sub>2</sub> CAS:2460-77-7 MolWeight:220 RetIndex:1633

CompName:2,5-di-tert-Butyl-1,4-benzoquinone

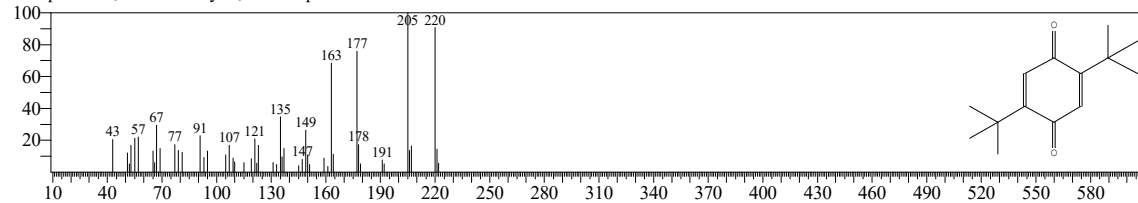

Hit#:3 Entry:154631 Library:NIST17.lib

SI:57 Formula:C<sub>17</sub>H<sub>28</sub>O<sub>3</sub> CAS:127156-28-9 MolWeight:280 RetIndex:1980

CompName:(3S,3aS,6R,7R,9aS)-6-Hydroxy-1,1,7-trimethyldecahydro-3a,7-methanocyclopenta[8]annulen-3-yl acetate

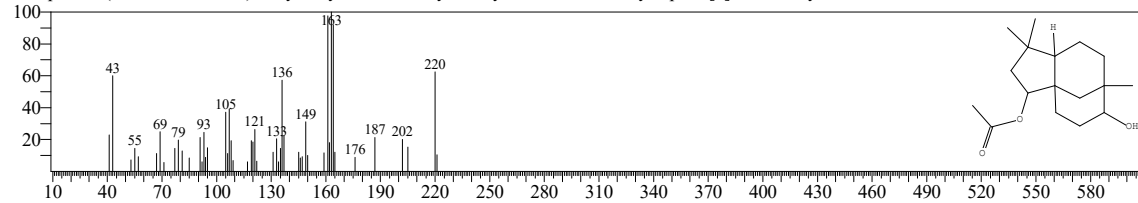

Hit#:4 Entry:258068 Library:W11N17MAIN1.lib

SI:57 Formula:C<sub>15</sub>H<sub>24</sub>O CAS:0-00-0 MolWeight:220 RetIndex:1604

CompName:1s,4R,7R,11R-8-Hydroxy-1,3,4,7-tetramethyltricyclo[5.3.1.0(4,11)]undec-2-ene

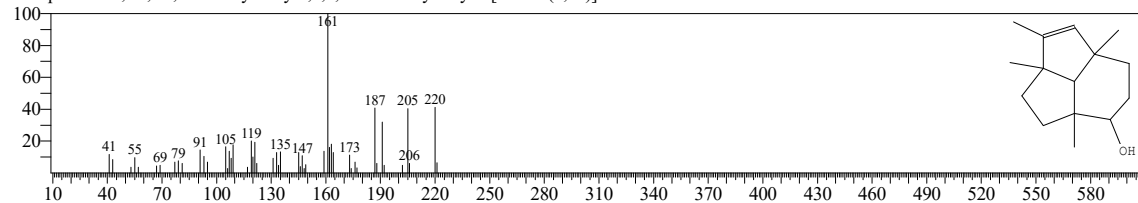

<< Target >>

Line#:47 R.Time:40.440(Scan#:7529) Retention Index:1676 MassPeaks:258

RawMode:Averaged 40.410-40.540(7523-7549) BasePeak:109.10(326)

BG Mode:Calc. from Peak Group 1 - Event 1 Scan

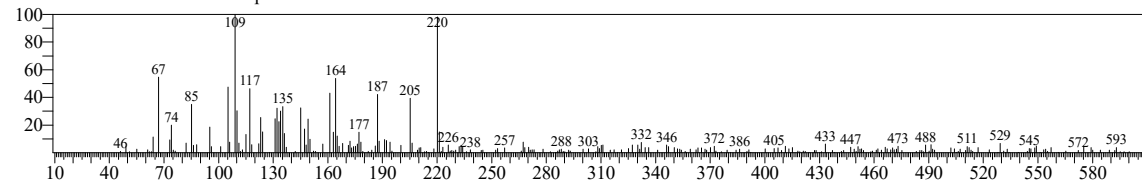

Hit#:5 Entry:91712 Library:NIST17.lib

SI:57 Formula:C15H24O CAS:0-00-0 MolWeight:220 RetIndex:1604

CompName:1s,4R,7R,11R-8-Hydroxy-1,3,4,7-tetramethyltricyclo[5.3.1.0(4,11)]undec-2-ene

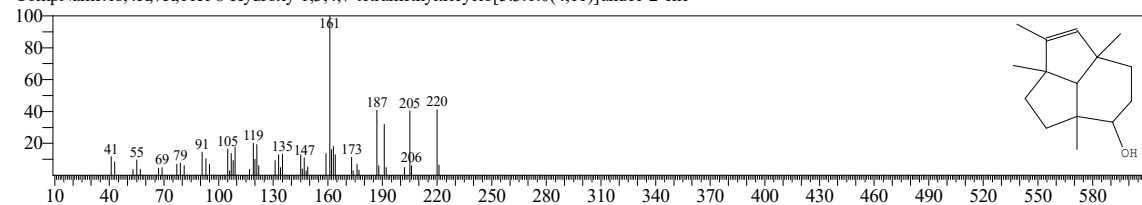

Hit#:6 Entry:467926 Library:W11N17MAIN1.lib

SI:57 Formula:C17H28O3 CAS:127156-28-9 MolWeight:280 RetIndex:1980

CompName:(3S,3aS,6R,7R,9aS)-6-Hydroxy-1,1,7-trimethyldecahydro-3a,7-methanocyclopenta[8]annulen-3-yl acetate

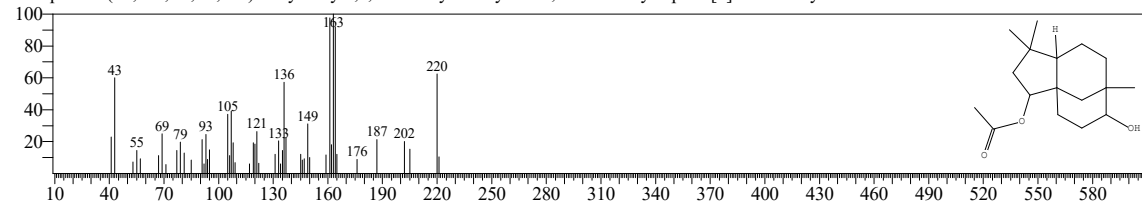

Hit#:7 Entry:257250 Library:W11N17MAIN1.lib

SI:56 Formula:C15H24O CAS:11056-03-4 MolWeight:220 RetIndex:0

CompName:Vulgarol B

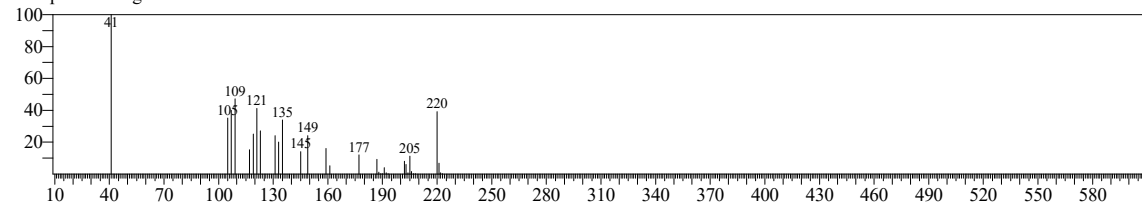

Hit#:8 Entry:256779 Library:W11N17MAIN1.lib

SI:56 Formula:C14H20O2 CAS:719-22-2 MolWeight:220 RetIndex:1633

CompName:2,5-Cyclohexadiene-1,4-dione, 2,6-bis(1,1-dimethylethyl)-

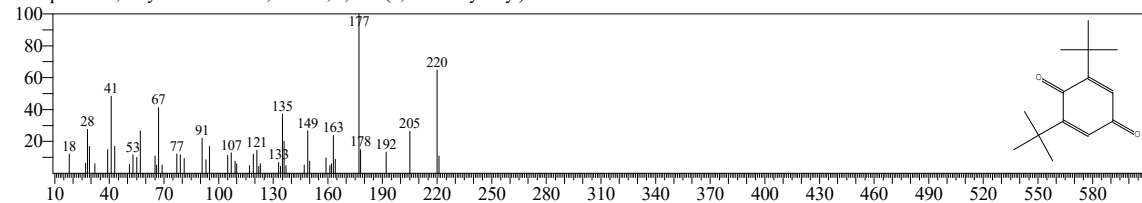

<< Target >>

Line#:47 R.Time:40.440(Scan#:7529) Retention Index:1676 MassPeaks:258

RawMode:Averaged 40.410-40.540(7523-7549) BasePeak:109.10(326)

BG Mode:Calc. from Peak Group 1 - Event 1 Scan

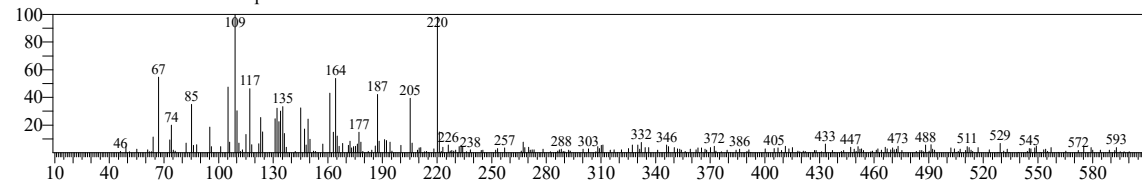

Hit#:9 Entry:91490 Library:NIST17.lib

SI:56 Formula:C14H20O2 CAS:719-22-2 MolWeight:220 RetIndex:1633

CompName:2,5-Cyclohexadiene-1,4-dione, 2,6-bis(1,1-dimethylethyl)-

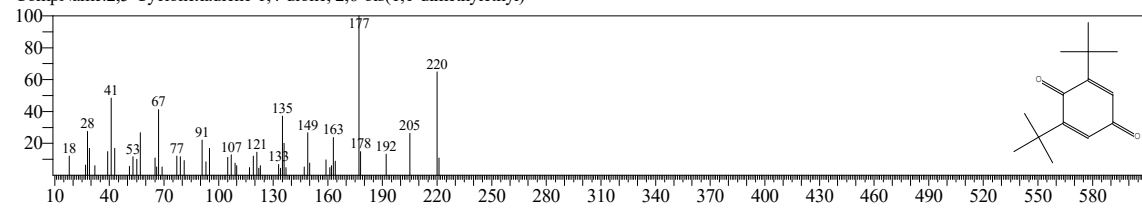

Hit#:10 Entry:257765 Library:W11N17MAIN1.lib

SI:56 Formula:C15H24O CAS:104188-24-1 MolWeight:220 RetIndex:1293

CompName:(1aR,1bS,2aS,5S,5aS,7aS)-2,2,5,7a-Tetramethyldecahydrocyclopenta[2',3']cyclobuta[1',2':3,4]benzo[1,2-b]oxirene

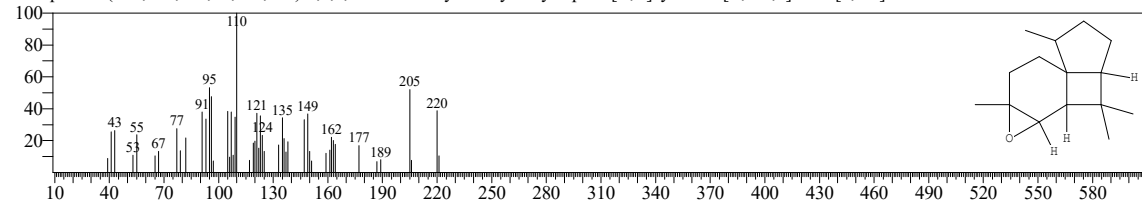

<< Target >>

Line#:48 R.Time:40.605(Scan#:7562) Retention Index:1681 MassPeaks:287

RawMode:Averaged 40.545-40.670(7550-7575) BasePeak:109.10(2110)

BG Mode:Calc. from Peak Group 1 - Event 1 Scan

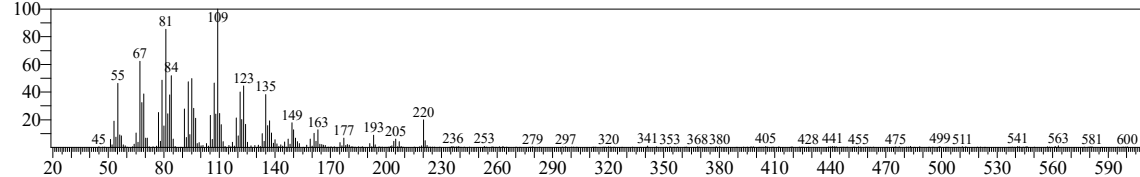

Hit#:1 Entry:94016 Library:NIST17.lib

SI:85 Formula:C15H26O CAS:35727-45-8 MolWeight:222 RetIndex:1555

CompName:Cyclohexanol, 3-ethenyl-3-methyl-2-(1-methylethenyl)-6-(1-methylethyl)-, [1R-(1.alpha.,2.alpha.,3.beta.,6.alpha.)]-

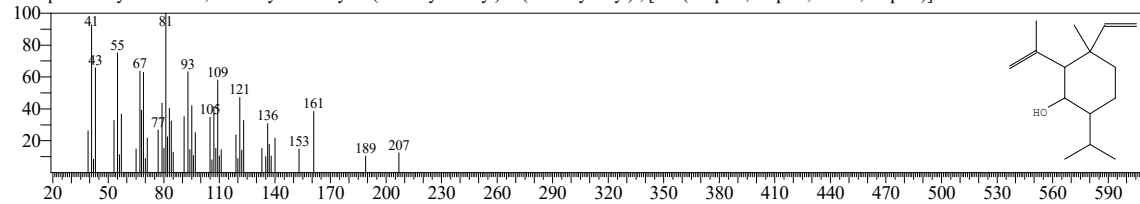

Hit#:2 Entry:265944 Library:W11N17MAIN1.lib

SI:85 Formula:C15H26O CAS:35727-45-8 MolWeight:222 RetIndex:1555

CompName:Cyclohexanol, 3-ethenyl-3-methyl-2-(1-methylethenyl)-6-(1-methylethyl)-, [1R-(1.alpha.,2.alpha.,3.beta.,6.alpha.)]-

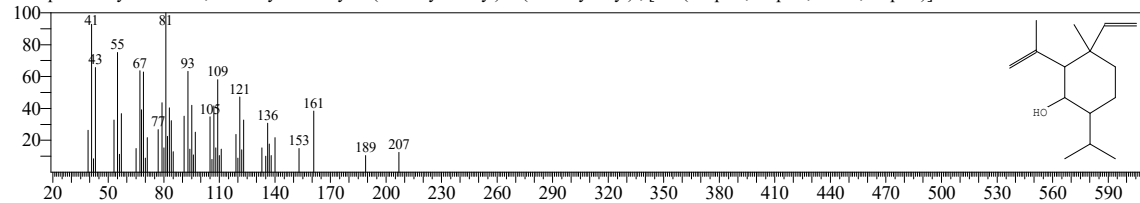

Hit#:3 Entry:166110 Library:NIST17.lib

SI:85 Formula:C20H34O CAS:21738-29-4 MolWeight:290 RetIndex:2162

CompName:(E)-3-Methyl-5-((1R,4aR,8aR)-5,5,8a-trimethyl-2-methylenedecahydronaphthalen-1-yl)pent-2-en-1-ol

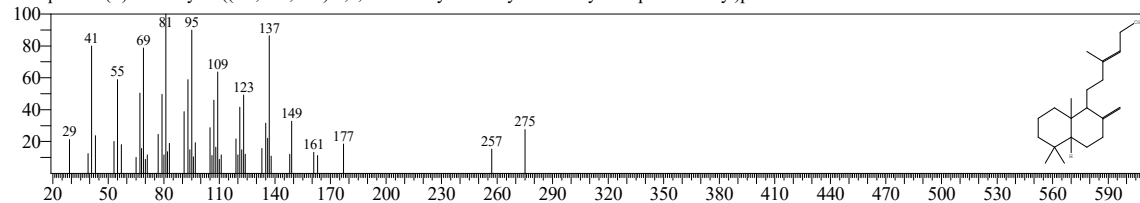

Hit#:4 Entry:503899 Library:W11N17MAIN1.lib

SI:85 Formula:C20H34O CAS:21738-29-4 MolWeight:290 RetIndex:2162

CompName:(E)-3-Methyl-5-((1R,4aR,8aR)-5,5,8a-trimethyl-2-methylenedecahydronaphthalen-1-yl)pent-2-en-1-ol

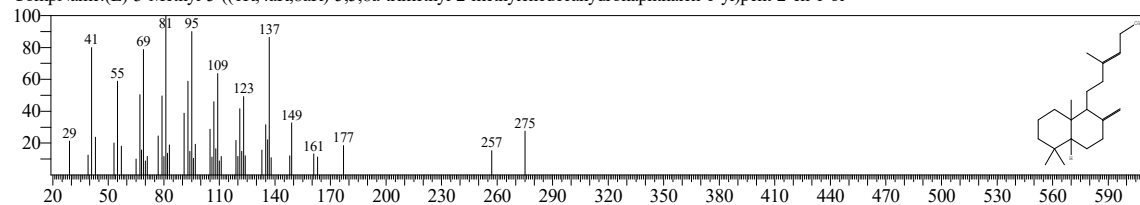

<< Target >>

Line#:48 R.Time:40.605(Scan#:7562) Retention Index:1681 MassPeaks:287

RawMode:Averaged 40.545-40.670(7550-7575) BasePeak:109.10(2110)

BG Mode:Calc. from Peak Group 1 - Event 1 Scan

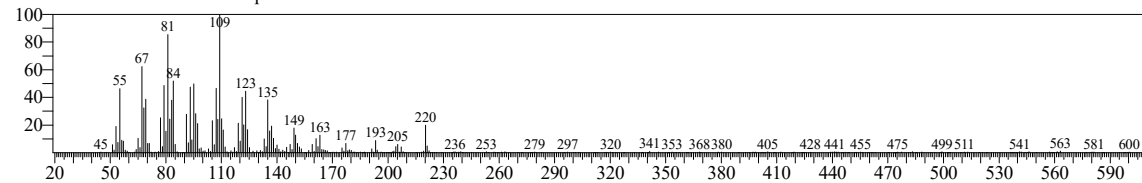

Hit#:5 Entry:265909 Library:W11N17MAIN1.lib

SI:84 Formula:C15H26O CAS:1139-17-9 MolWeight:222 RetIndex:1635

CompName:Isolongifolol

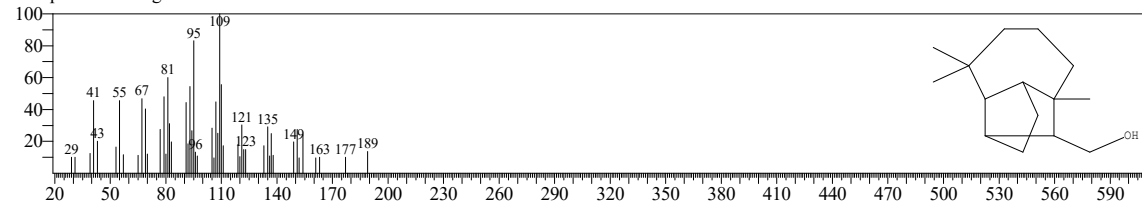

Hit#:6 Entry:94043 Library:NIST17.lib

SI:84 Formula:C15H26O CAS:1139-17-9 MolWeight:222 RetIndex:1635

CompName:Isolongifolol

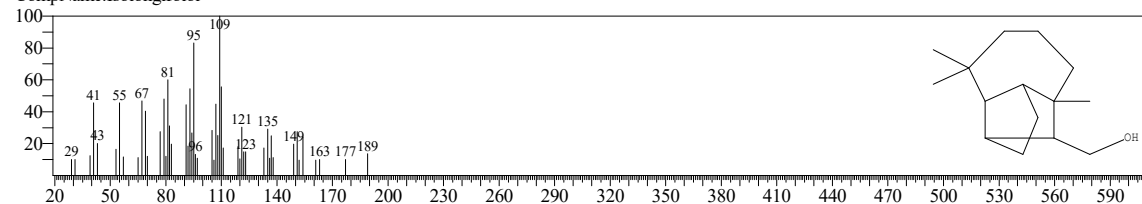

Hit#:7 Entry:257836 Library:W11N17MAIN1.lib

SI:84 Formula:C15H24O CAS:39510-36-6 MolWeight:220 RetIndex:1614

CompName:1,9-dimethyl-4-propan-2-yl-8-spiro[4.5]dec-9-enone

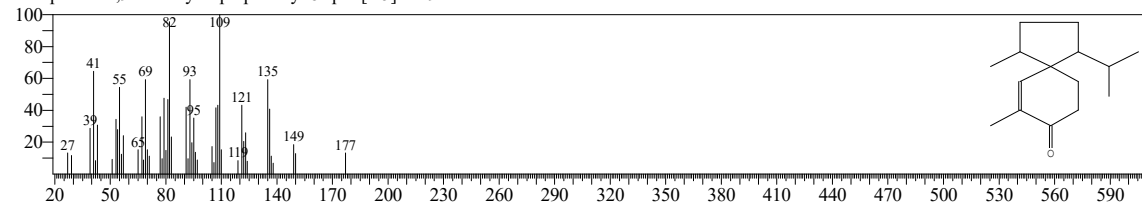

Hit#:8 Entry:257520 Library:W11N17MAIN1.lib

SI:84 Formula:C15H24O CAS:21653-33-8 MolWeight:220 RetIndex:1614

CompName:Acorenone B

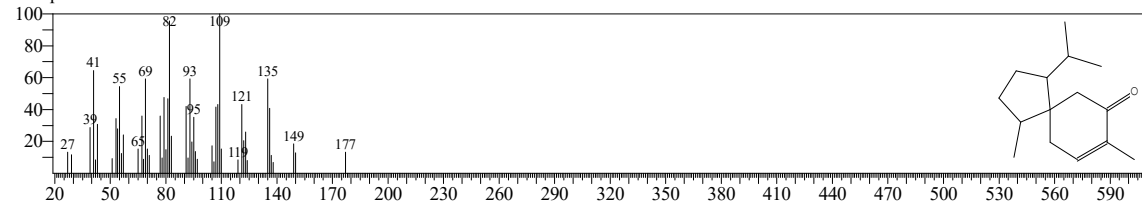

<< Target >>

Line#:48 R.Time:40.605(Scan#:7562) Retention Index:1681 MassPeaks:287

RawMode:Averaged 40.545-40.670(7550-7575) BasePeak:109.10(2110)

BG Mode:Calc. from Peak Group 1 - Event 1 Scan

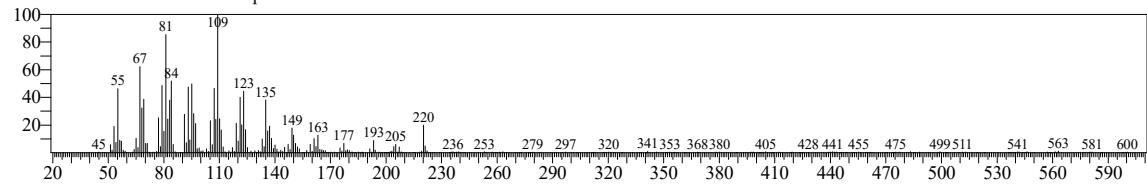

Hit#:9 Entry:91763 Library:NIST17.lib

SI:84 Formula:C15H24O CAS:21653-33-8 MolWeight:220 RetIndex:1614

CompName:Acorenone B

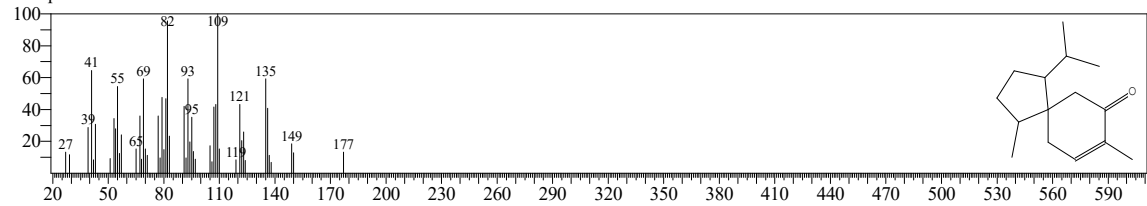

Hit#:10 Entry:265908 Library:W11N17MAIN1.lib

SI:83 Formula:C15H26O CAS:0-00-0 MolWeight:222 RetIndex:1635

CompName:(-)-Isolongifolol

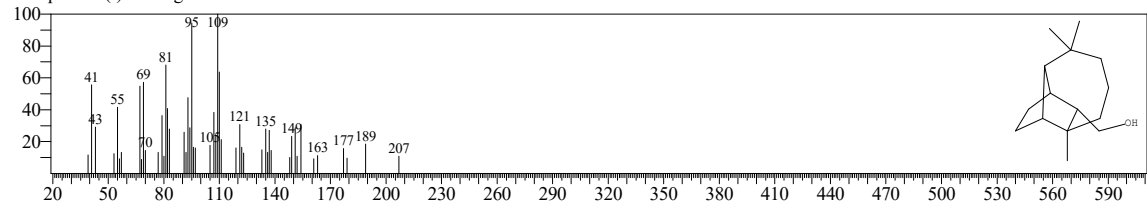



<< Target >>

Line#:49 R.Time:40.710(Scan#:7583) Retention Index:1684 MassPeaks:230

RawMode:Averaged 40.670-40.740(7575-7589) BasePeak:105.10(1370)

BG Mode:Calc. from Peak Group 1 - Event 1 Scan

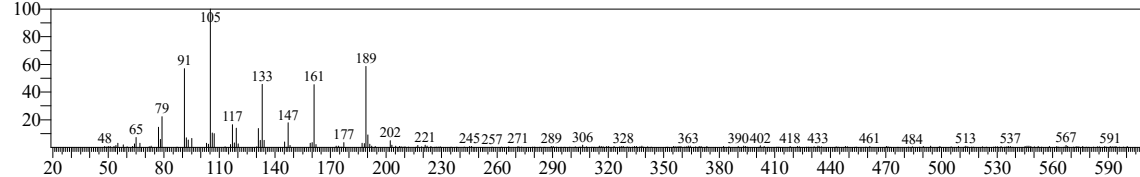

Hit#:1 Entry:203914 Library:W11N17MAIN1.lib

SI:78 Formula:C15H24 CAS:27862-07-3 MolWeight:204 RetIndex:1403

CompName:Aristolene

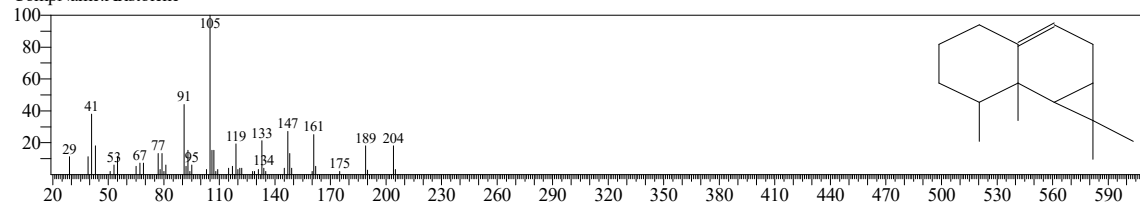

Hit#:2 Entry:204283 Library:W11N17MAIN1.lib

SI:78 Formula:C15H24 CAS:95910-36-4 MolWeight:204 RetIndex:1419

CompName:isolekene

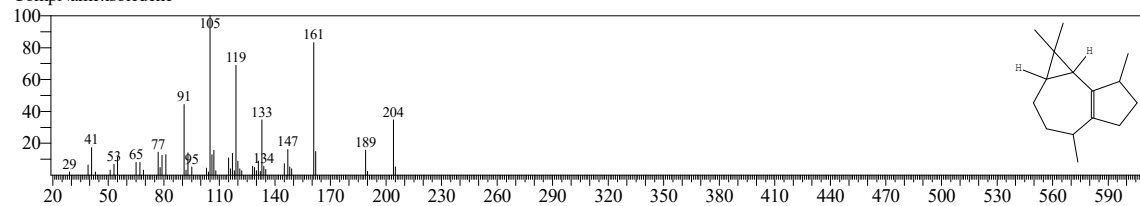

Hit#:3 Entry:75065 Library:NIST17.lib

SI:78 Formula:C15H24 CAS:95910-36-4 MolWeight:204 RetIndex:1419

CompName:isolekene

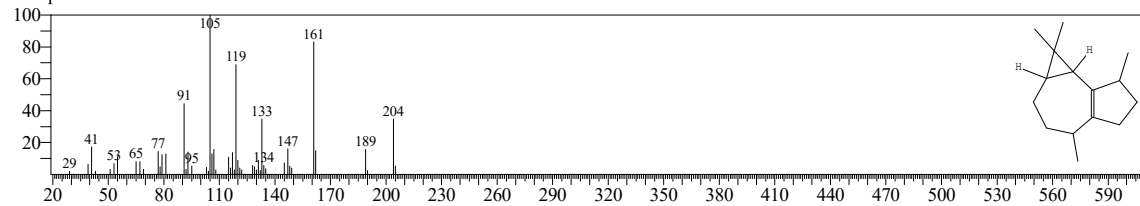

Hit#:4 Entry:75311 Library:NIST17.lib

SI:77 Formula:C15H24 CAS:6831-16-9 MolWeight:204 RetIndex:1403

CompName:(-)-Aristolene

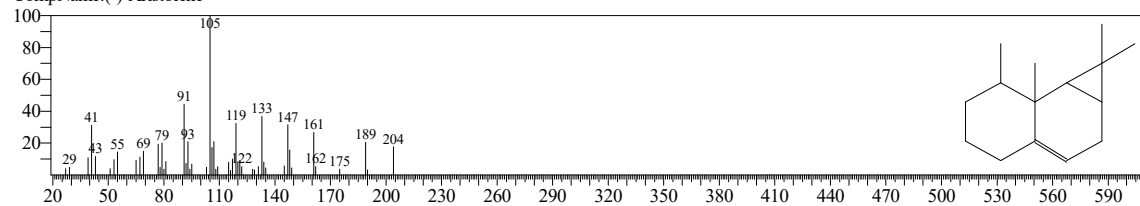

<< Target >>

Line#:49 R.Time:40.710(Scan#:7583) Retention Index:1684 MassPeaks:230

RawMode:Averaged 40.670-40.740(7575-7589) BasePeak:105.10(1370)

BG Mode:Calc. from Peak Group 1 - Event 1 Scan

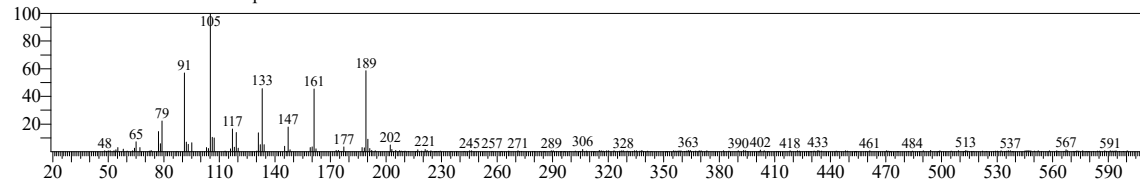

Hit#:5 Entry:203910 Library:W11N17MAIN1.lib

SI:77 Formula:C15H24 CAS:6831-16-9 MolWeight:204 RetIndex:1403

CompName:(-)-Aristolene

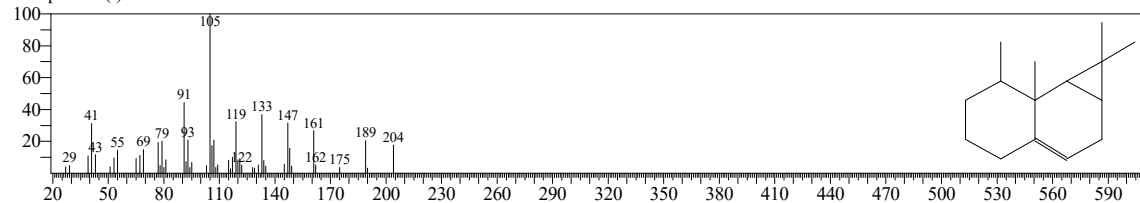

Hit#:6 Entry:75014 Library:NIST17.lib

SI:77 Formula:C15H24 CAS:0-00-0 MolWeight:204 RetIndex:1197

CompName:Cycloisolongifolene

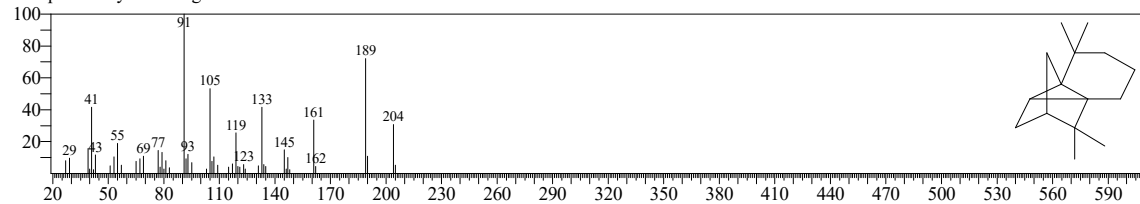

Hit#:7 Entry:204576 Library:W11N17MAIN1.lib

SI:77 Formula:C15H24 CAS:0-00-0 MolWeight:204 RetIndex:1197

CompName:Cycloisolongifolene

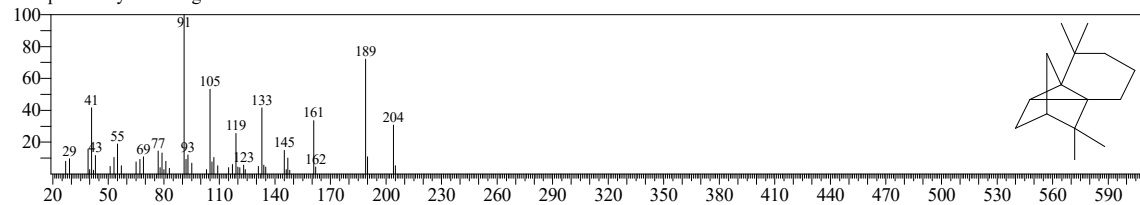

Hit#:8 Entry:203915 Library:W11N17MAIN1.lib

SI:77 Formula:C15H24 CAS:6831-16-9 MolWeight:204 RetIndex:1403

CompName:Aristolene

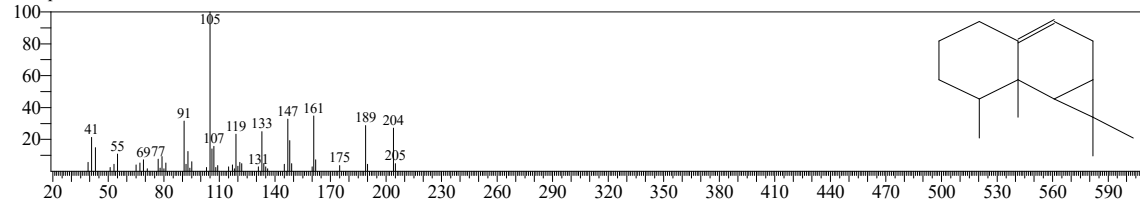

<< Target >>

Line#:49 R.Time:40.710(Scan#:7583) Retention Index:1684 MassPeaks:230

RawMode:Averaged 40.670-40.740(7575-7589) BasePeak:105.10(1370)

BG Mode:Calc. from Peak Group 1 - Event 1 Scan

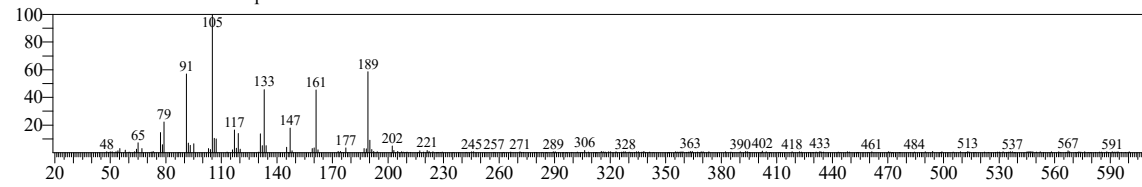

Hit#:9 Entry:204577 Library:W11N17MAIN1.lib

SI:77 Formula:C15H24 CAS:28380-07-6 MolWeight:204 RetIndex:1197

CompName:(2.alpha.,3a.beta.,3b.alpha.,7aR\*)-octahydro-1,1,4,4-tetramethyl-2,3b-methano-3bH-cyclopenta[1,3]cyclopropa[1,2]benzene

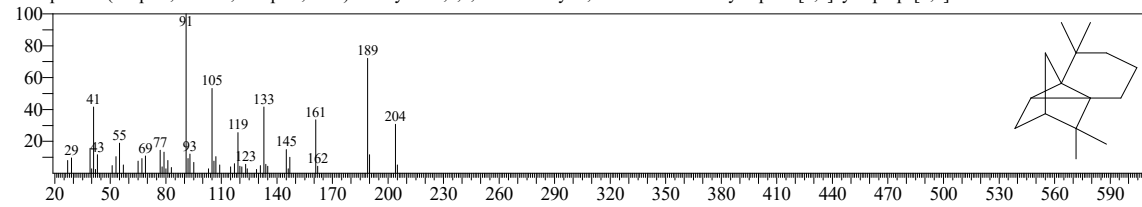

Hit#:10 Entry:75062 Library:NIST17.lib

SI:77 Formula:C15H24 CAS:6831-16-9 MolWeight:204 RetIndex:1403

CompName:(-)-Aristolene

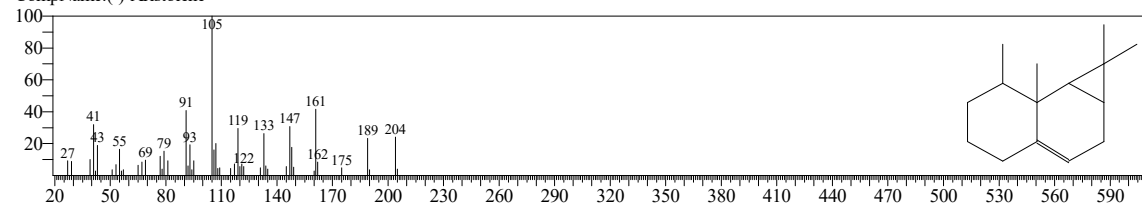

<< Target >>

Line#:50 R.Time:40.775(Scan#:7596) Retention Index:1685 MassPeaks:255

RawMode:Averaged 40.740-40.925(7589-7626) BasePeak:199.15(1519)

BG Mode:Calc. from Peak Group 1 - Event 1 Scan

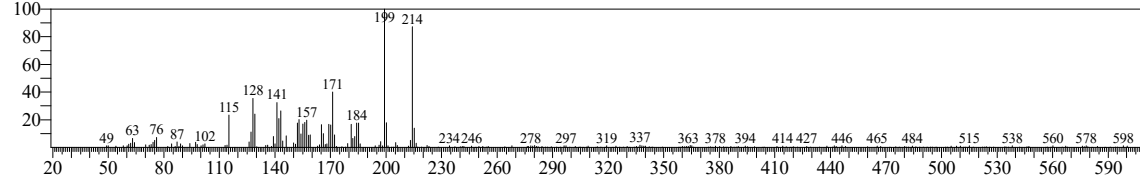

Hit#:1 Entry:243373 Library:W11N17MAIN1.lib

SI:76 Formula:C14H16O2 CAS:74421-14-0 MolWeight:216 RetIndex:1699

CompName:1H-Inden-1-one, 2,3-dihydro-3-methoxy-2-(2-methyl-1-propenyl)-

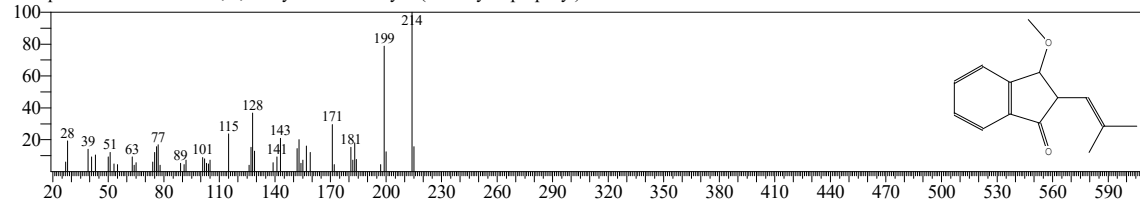

Hit#:2 Entry:243372 Library:W11N17MAIN1.lib

SI:76 Formula:C14H16O2 CAS:74421-14-0 MolWeight:216 RetIndex:1699

CompName:1H-Inden-1-one, 2,3-dihydro-3-methoxy-2-(2-methyl-1-propenyl)-

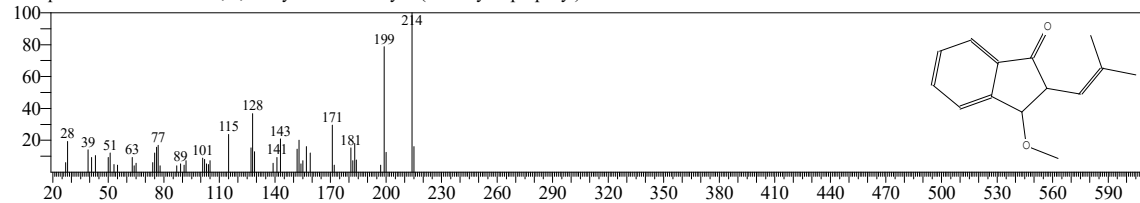

Hit#:3 Entry:87465 Library:NIST17.lib

SI:76 Formula:C14H16O2 CAS:74421-14-0 MolWeight:216 RetIndex:1699

CompName:1H-Inden-1-one, 2,3-dihydro-3-methoxy-2-(2-methyl-1-propenyl)-

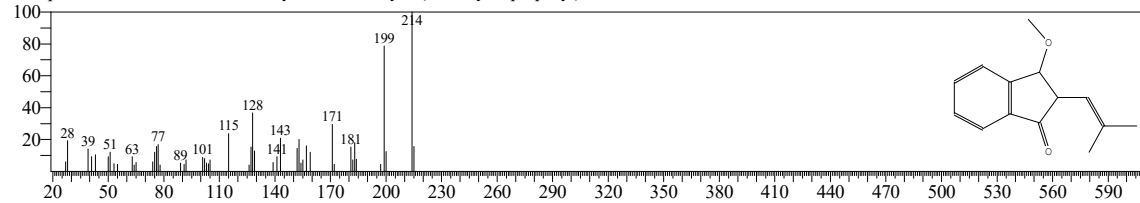

Hit#:4 Entry:237168 Library:W11N17MAIN1.lib

SI:76 Formula:C14H14O2 CAS:74384-47-7 MolWeight:214 RetIndex:1738

CompName:1-Indanone, 2-isobutenyl-3-methoxy-

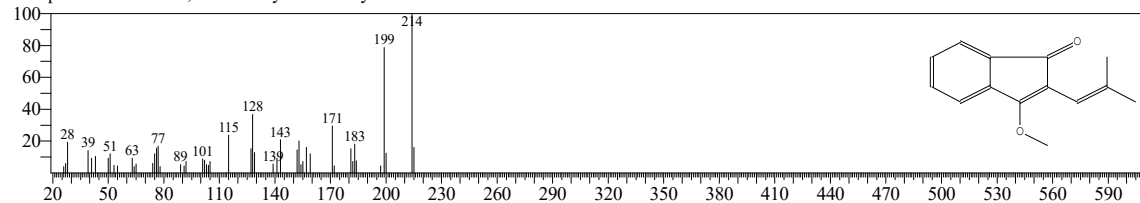

<< Target >>

Line#:50 R.Time:40.775(Scan#:7596) Retention Index:1685 MassPeaks:255

RawMode:Averaged 40.740-40.925(7589-7626) BasePeak:199.15(1519)

BG Mode:Calc. from Peak Group 1 - Event 1 Scan

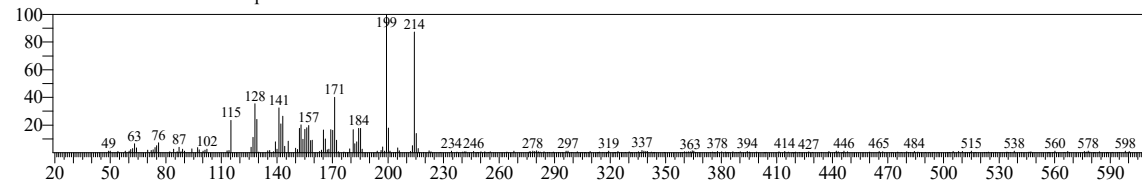

Hit#:5 Entry:85802 Library:NIST17.lib

SI:75 Formula:C15H18O CAS:60683-42-3 MolWeight:214 RetIndex:1747

CompName:Naphthalene, 1-(1,1-dimethylethyl)-7-methoxy-

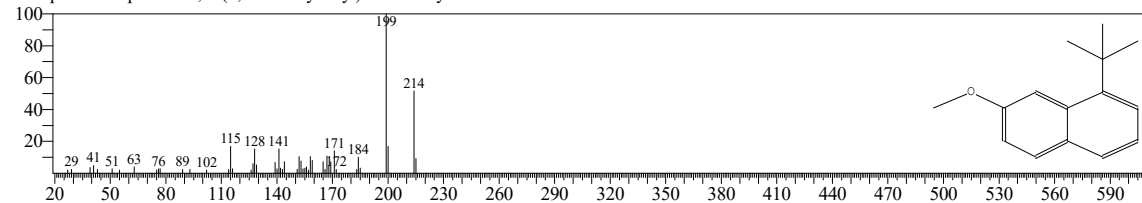

Hit#:6 Entry:237801 Library:W11N17MAIN1.lib

SI:75 Formula:C15H18O CAS:60683-42-3 MolWeight:214 RetIndex:1747

CompName:Naphthalene, 1-(1,1-dimethylethyl)-7-methoxy-

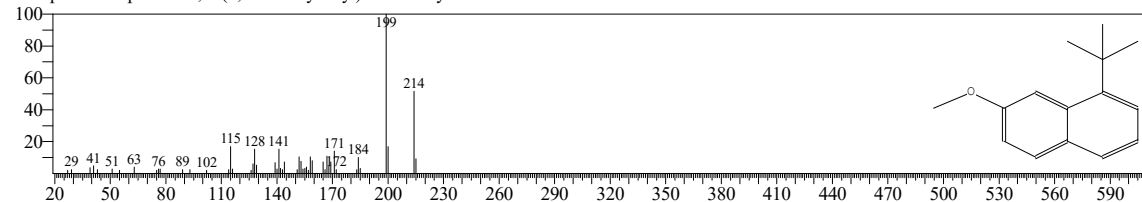

Hit#:7 Entry:237776 Library:W11N17MAIN1.lib

SI:73 Formula:C15H18O CAS:18937-66-1 MolWeight:214 RetIndex:1602

CompName:Azulen-2-ol, 1,4-dimethyl-7-(1-methylethyl)-

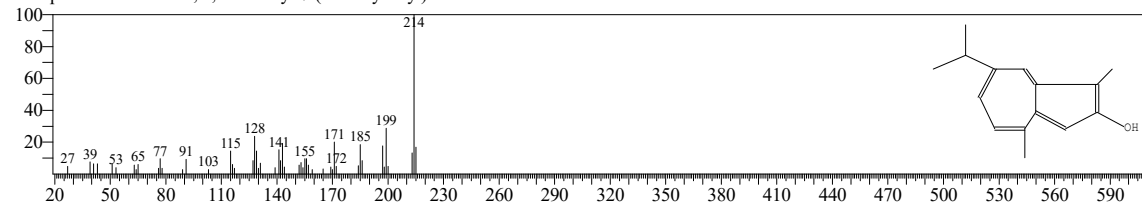

Hit#:8 Entry:85807 Library:NIST17.lib

SI:73 Formula:C15H18O CAS:18937-66-1 MolWeight:214 RetIndex:1602

CompName:Azulen-2-ol, 1,4-dimethyl-7-(1-methylethyl)-

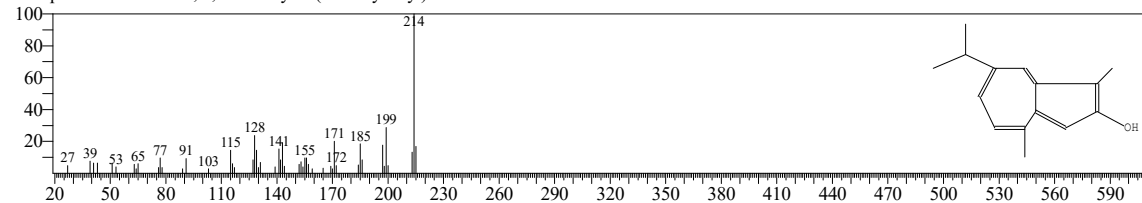

<< Target >>

Line#:50 R.Time:40.775(Scan#:7596) Retention Index:1685 MassPeaks:255

RawMode:Averaged 40.740-40.925(7589-7626) BasePeak:199.15(1519)

BG Mode:Calc. from Peak Group 1 - Event 1 Scan

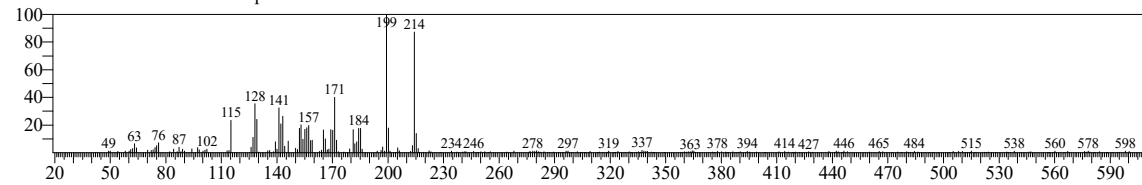

Hit#:9 Entry:237849 Library:W11N17MAIN1.lib

SI:72 Formula:C15H18O CAS:2102-75-2 MolWeight:214 RetIndex:1926

CompName:7-Hydroxycadalene

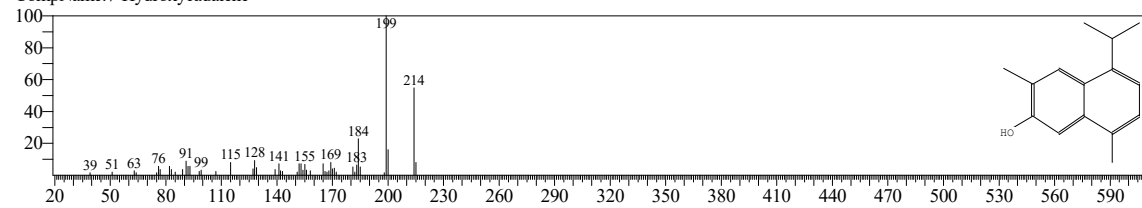

Hit#:10 Entry:85804 Library:NIST17.lib

SI:72 Formula:C15H18O CAS:2102-75-2 MolWeight:214 RetIndex:1926

CompName:7-Hydroxycadalene

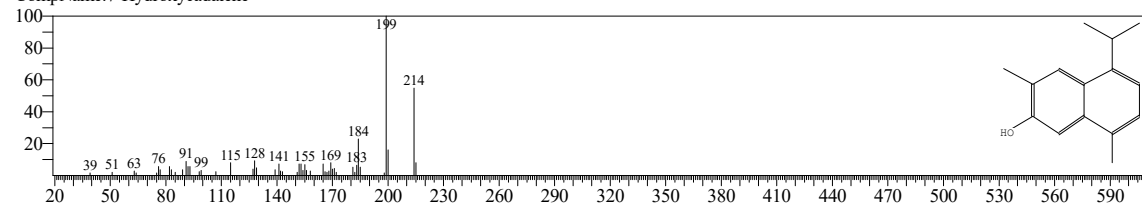

<< Target >>

Line#:51 R.Time:42.570(Scan#:7955) Retention Index:1735 MassPeaks:320

RawMode:Averaged 42.515-42.695(7944-7980) BasePeak:109.10(1112)

BG Mode:Calc. from Peak Group 1 - Event 1 Scan

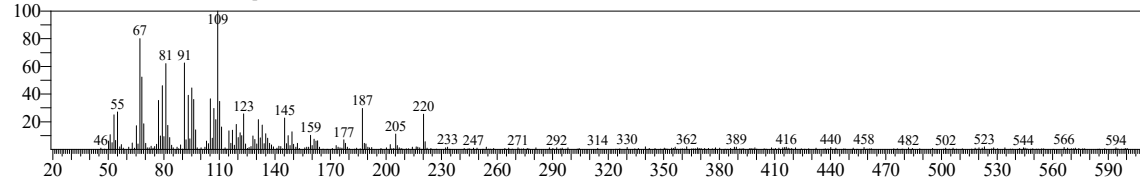

Hit#:1 Entry:257873 Library:W11N17MAIN1.lib

SI:82 Formula:C15H24O CAS:81968-62-9 MolWeight:220 RetIndex:1699

CompName:(1R,7S,E)-7-Isopropyl-4,10-dimethylenecyclodec-5-enol

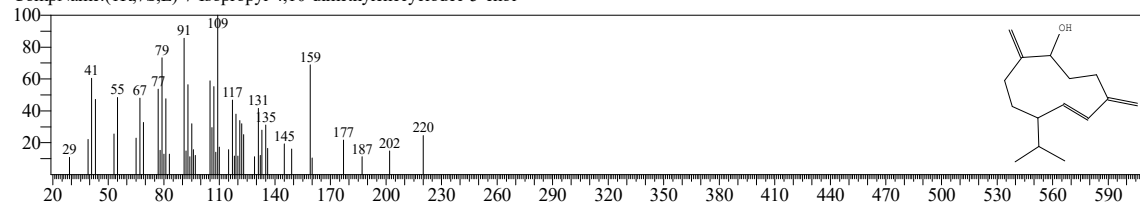

Hit#:2 Entry:91640 Library:NIST17.lib

SI:82 Formula:C15H24O CAS:81968-62-9 MolWeight:220 RetIndex:1699

CompName:(1R,7S,E)-7-Isopropyl-4,10-dimethylenecyclodec-5-enol



Hit#:3 Entry:257950 Library:W11N17MAIN1.lib

SI:81 Formula:C15H24O CAS:0-00-0 MolWeight:220 RetIndex:1599

CompName:Longipinocarveol, trans-

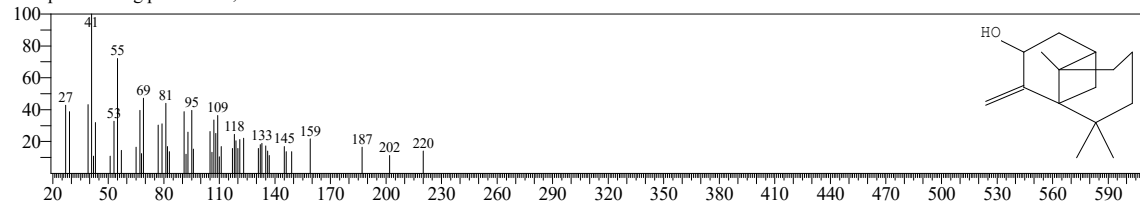

Hit#:4 Entry:91554 Library:NIST17.lib

SI:81 Formula:C15H24O CAS:0-00-0 MolWeight:220 RetIndex:1599

CompName:Longipinocarveol, trans-

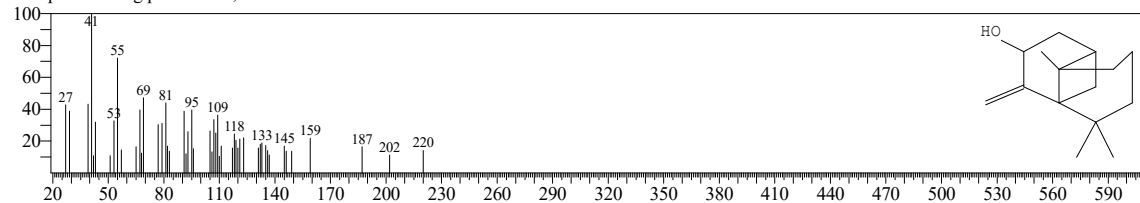

<< Target >>

Line#:51 R.Time:42.570(Scan#:7955) Retention Index:1735 MassPeaks:320

RawMode:Averaged 42.515-42.695(7944-7980) BasePeak:109.10(1112)

BG Mode:Calc. from Peak Group 1 - Event 1 Scan

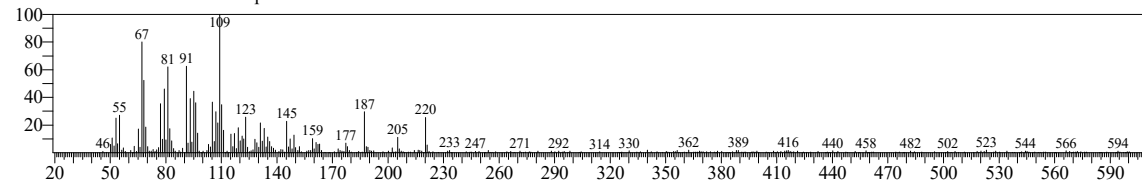

Hit#:5 Entry:257951 Library:W11N17MAIN1.lib

SI:81 Formula:C15H24O CAS:0-00-0 MolWeight:220 RetIndex:1599

CompName:Longipinocarveol, trans-

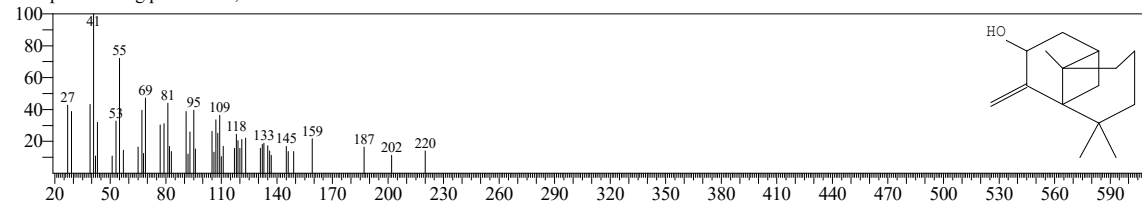

Hit#:6 Entry:257825 Library:W11N17MAIN1.lib

SI:80 Formula:C15H24O CAS:1139-30-6 MolWeight:220 RetIndex:1507

CompName:5-Oxatricyclo[8.2.0.0.4,6]dodecane, 4,12,12-trimethyl-9-methylene-, (1R,4R,6R,10S)-

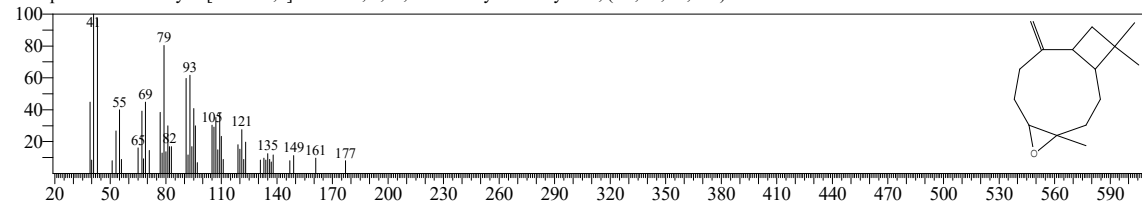

Hit#:7 Entry:257824 Library:W11N17MAIN1.lib

SI:80 Formula:C15H24O CAS:1139-30-6 MolWeight:220 RetIndex:1507

CompName:5-Oxatricyclo[8.2.0.0.4,6]dodecane, 4,12,12-trimethyl-9-methylene-, (1R,4R,6R,10S)-

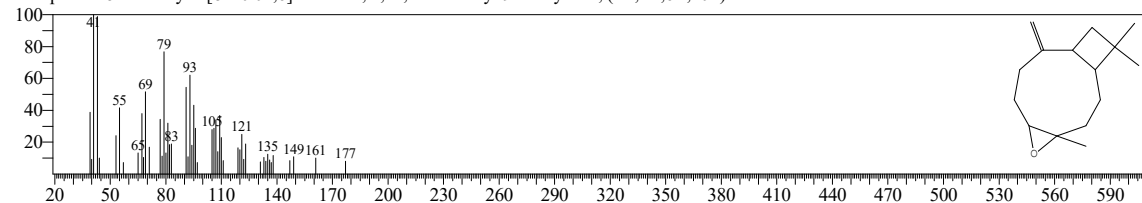

Hit#:8 Entry:145 Library:FFNSC 1.2.lib

SI:79 Formula:C15H24O CAS:1139-30-6 MolWeight:220 RetIndex:1587

CompName:Caryophyllene oxide; Dodecane <5-oxatricyclo(8.2.0.0.4,6), 4,12,12-trimethyl-, 9-methylene->

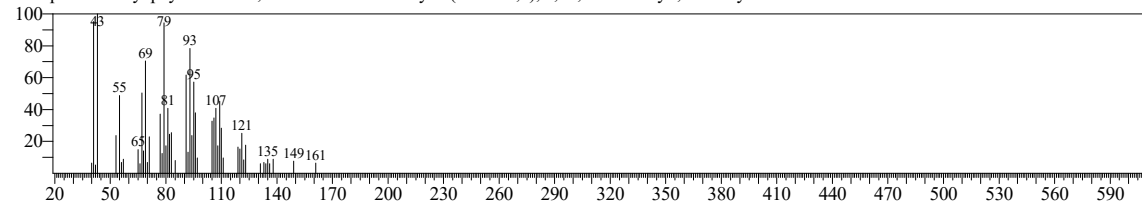



<< Target >>

Line#:51 R.Time:42.570(Scan#:7955) Retention Index:1735 MassPeaks:320

RawMode:Averaged 42.515-42.695(7944-7980) BasePeak:109.10(1112)

BG Mode:Calc. from Peak Group 1 - Event 1 Scan

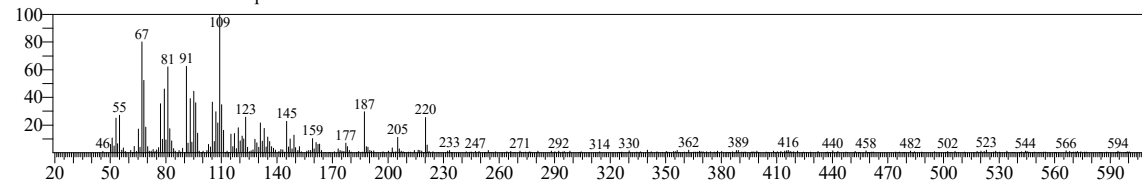

Hit#:9 Entry:91570 Library:NIST17.lib

SI:79 Formula:C15H24O CAS:1139-30-6 MolWeight:220 RetIndex:1507

CompName:Caryophyllene oxide

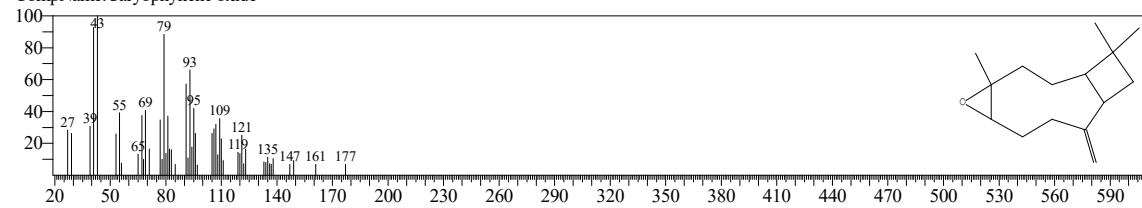

Hit#:10 Entry:257821 Library:W11N17MAIN1.lib

SI:79 Formula:C15H24O CAS:1139-30-6 MolWeight:220 RetIndex:1507

CompName:Caryophyllene oxide

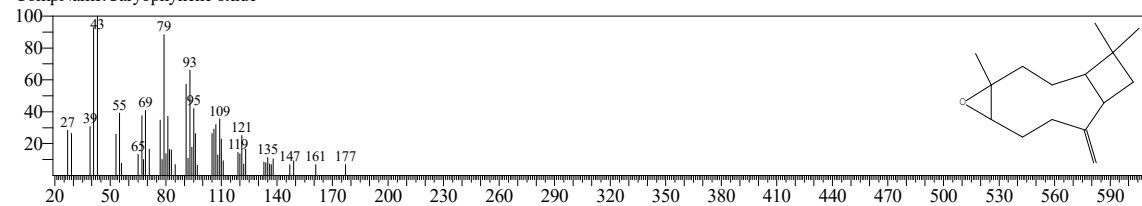

<< Target >>

Line#:52 R.Time:44.460(Scan#:8333) Retention Index:1789 MassPeaks:343

RawMode:Averaged 44.380-44.610(8317-8363) BasePeak:199.15(35271)

BG Mode:Calc. from Peak Group 1 - Event 1 Scan

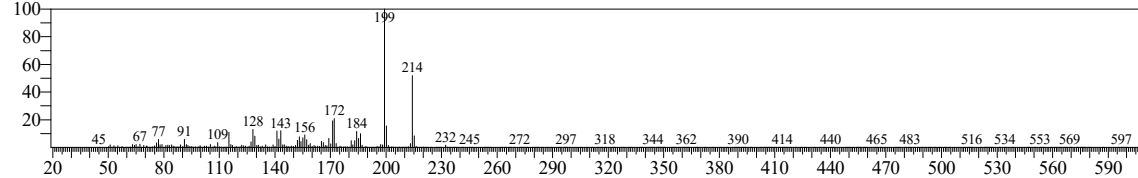

Hit#:1 Entry:238021 Library:W11N17MAIN1.lib

SI:87 Formula:C16H22 CAS:42173-25-1 MolWeight:214 RetIndex:1879

CompName:Anthracene, 1,2,3,4,5,6,7,8-octahydro-9,10-dimethyl-

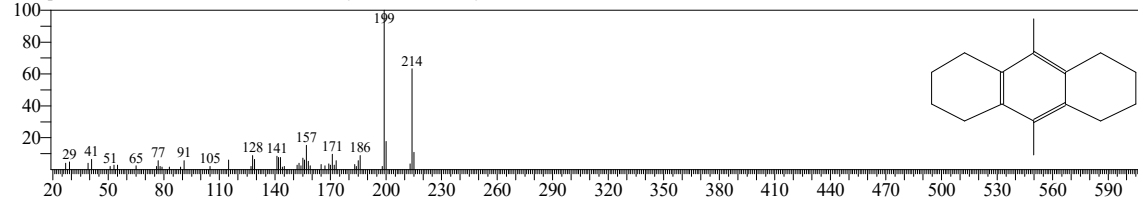

Hit#:2 Entry:85819 Library:NIST17.lib

SI:87 Formula:C16H22 CAS:42173-25-1 MolWeight:214 RetIndex:1879

CompName:Anthracene, 1,2,3,4,5,6,7,8-octahydro-9,10-dimethyl-

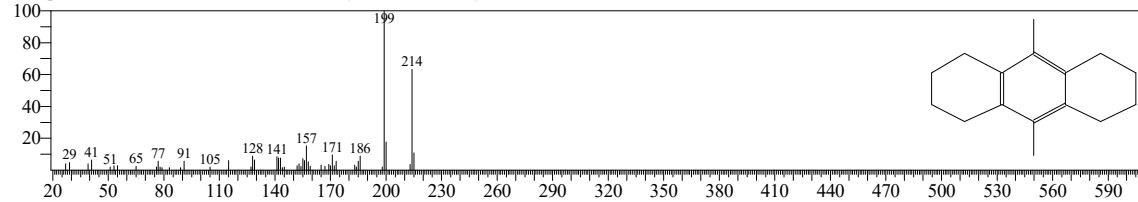

Hit#:3 Entry:238022 Library:W11N17MAIN1.lib

SI:87 Formula:C16H22 CAS:42173-25-1 MolWeight:214 RetIndex:1879

CompName:9,10-Dimethyl-1,2,3,4,5,6,7,8-octahydroanthracene

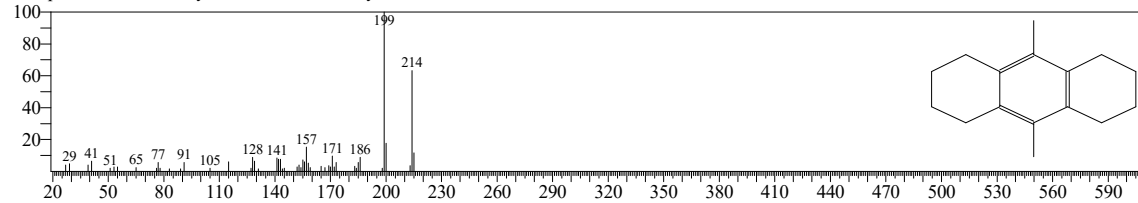

Hit#:4 Entry:238023 Library:W11N17MAIN1.lib

SI:85 Formula:C16H22 CAS:42173-25-1 MolWeight:214 RetIndex:1879

CompName:Anthracene, 1,2,3,4,5,6,7,8-octahydro-9,10-dimethyl-

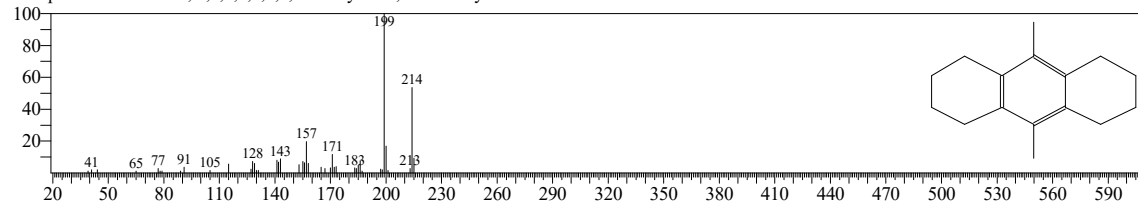

<< Target >>

Line#:52 R.Time:44.460(Scan#:8333) Retention Index:1789 MassPeaks:343

RawMode:Averaged 44.380-44.610(8317-8363) BasePeak:199.15(35271)

BG Mode:Calc. from Peak Group 1 - Event 1 Scan

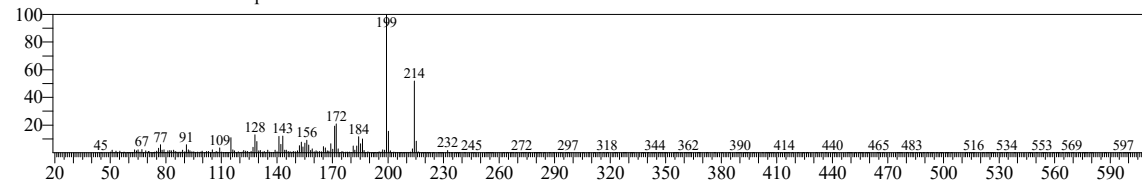

Hit#:5 Entry:85822 Library:NIST17.lib

SI:85 Formula:C16H22 CAS:42173-25-1 MolWeight:214 RetIndex:1879

CompName:Anthracene, 1,2,3,4,5,6,7,8-octahydro-9,10-dimethyl-

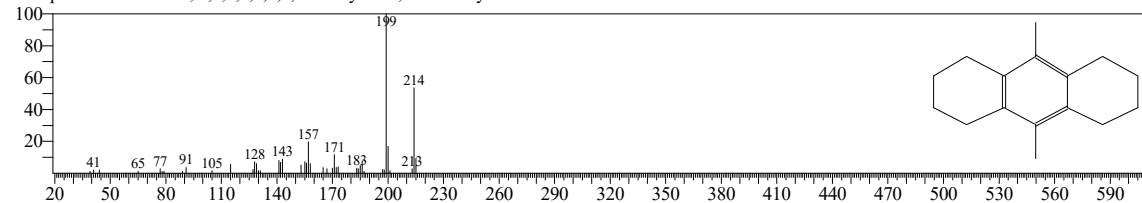

Hit#:6 Entry:237849 Library:W11N17MAIN1.lib

SI:82 Formula:C15H18O CAS:2102-75-2 MolWeight:214 RetIndex:1926

CompName:7-Hydroxycadalene

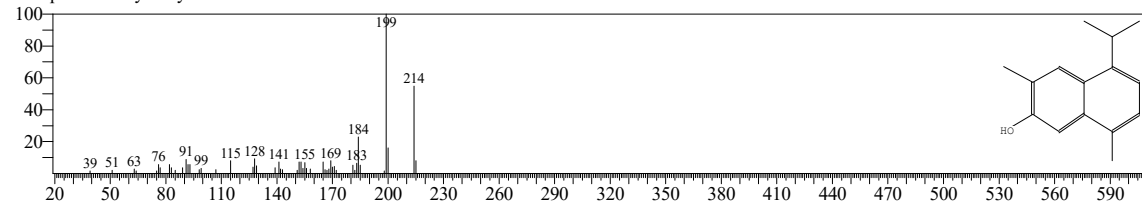

Hit#:7 Entry:85804 Library:NIST17.lib

SI:82 Formula:C15H18O CAS:2102-75-2 MolWeight:214 RetIndex:1926

CompName:7-Hydroxycadalene

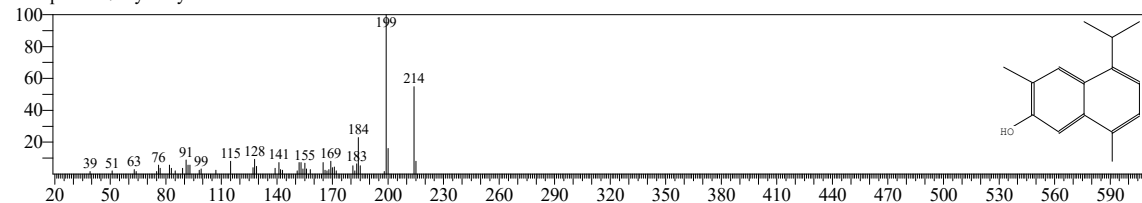

Hit#:8 Entry:85802 Library:NIST17.lib

SI:82 Formula:C15H18O CAS:60683-42-3 MolWeight:214 RetIndex:1747

CompName:Naphthalene, 1-(1,1-dimethylethyl)-7-methoxy-

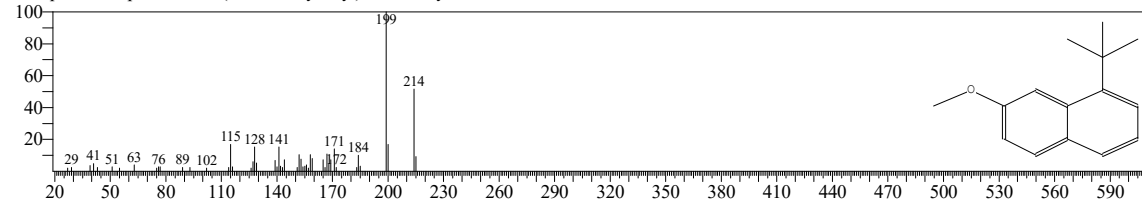

<< Target >>

Line#:52 R.Time:44.460(Scan#:8333) Retention Index:1789 MassPeaks:343

RawMode:Averaged 44.380-44.610(8317-8363) BasePeak:199.15(35271)

BG Mode:Calc. from Peak Group 1 - Event 1 Scan

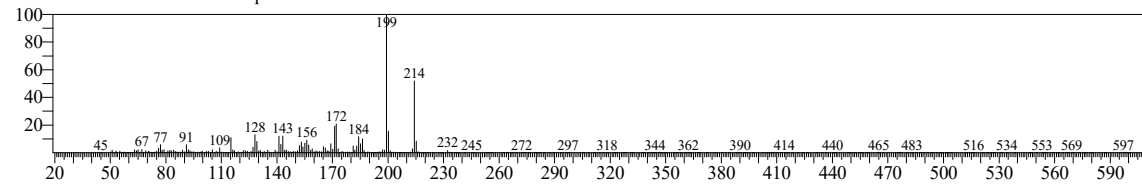

Hit#:9 Entry:237801 Library:W11N17MAIN1.lib

SI:82 Formula:C15H18O CAS:60683-42-3 MolWeight:214 RetIndex:1747

CompName:Naphthalene, 1-(1,1-dimethylethyl)-7-methoxy-

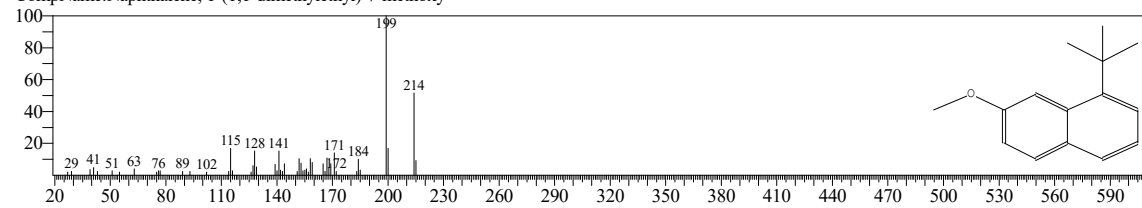

Hit#:10 Entry:237850 Library:W11N17MAIN1.lib

SI:78 Formula:C15H18O CAS:2102-75-2 MolWeight:214 RetIndex:1926

CompName:5-Isopropyl-3,8-dimethyl-2-naphthol

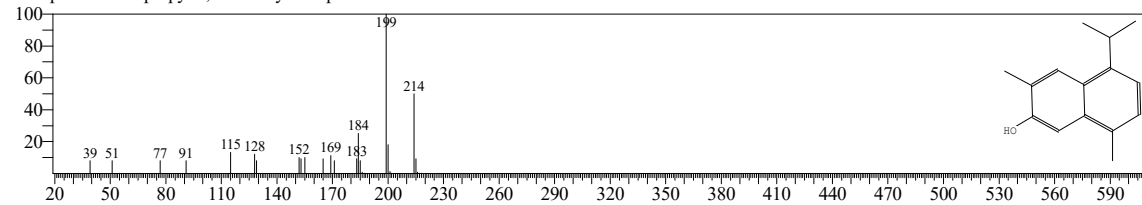

<< Target >>

Line#:53 R.Time:44.795(Scan#:8400) Retention Index:1798 MassPeaks:373

RawMode:Averaged 44.610-44.910(8363-8423) BasePeak:109.10(333670)

BG Mode:Calc. from Peak Group 1 - Event 1 Scan

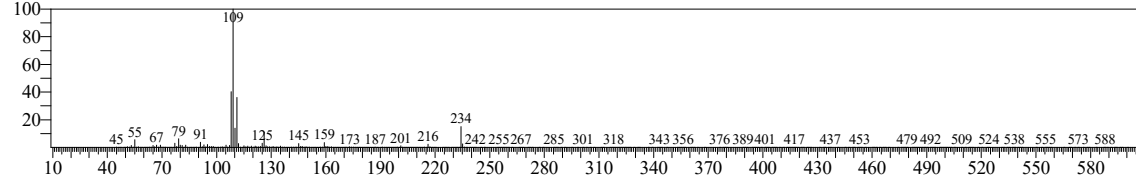

Hit#:1 Entry:167005 Library:W11N17MAIN1.lib

SI:78 Formula:C13H20O CAS:0-00-0 MolWeight:192 RetIndex:1497

CompName:2-(1-Cyclopent-1-enyl-1-methylethyl)cyclopentanone

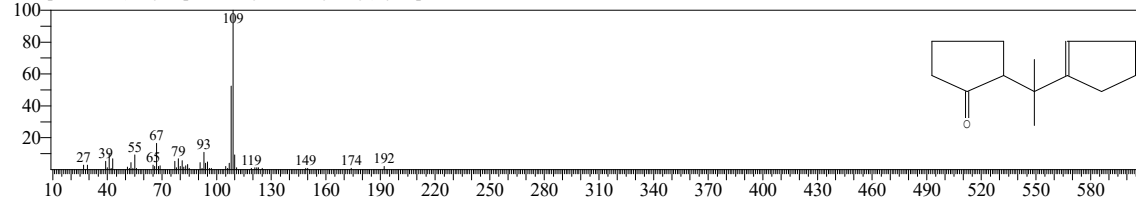

Hit#:2 Entry:63259 Library:NIST17.lib

SI:78 Formula:C13H20O CAS:0-00-0 MolWeight:192 RetIndex:1497

CompName:2-(1-Cyclopent-1-enyl-1-methylethyl)cyclopentanone

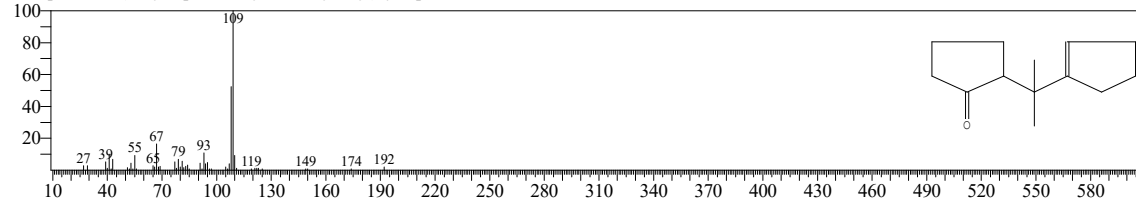

Hit#:3 Entry:87081 Library:NIST17.lib

SI:75 Formula:C12H12N2O2 CAS:1141-05-5 MolWeight:216 RetIndex:1878

CompName:1,2-Ethanediol, 1,2-di-2-pyridinyl-

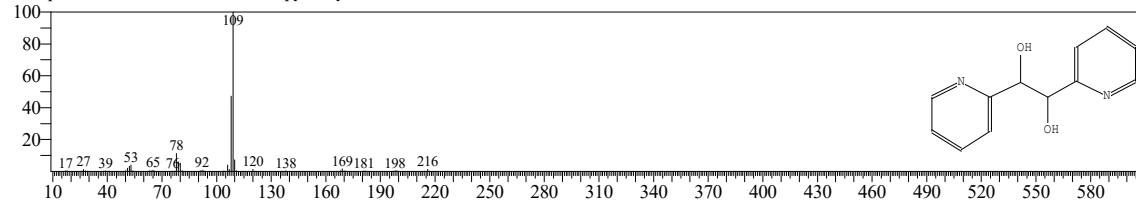

Hit#:4 Entry:241985 Library:W11N17MAIN1.lib

SI:75 Formula:C12H12N2O2 CAS:1141-05-5 MolWeight:216 RetIndex:1878

CompName:1,2-Ethanediol, 1,2-di-2-pyridinyl-

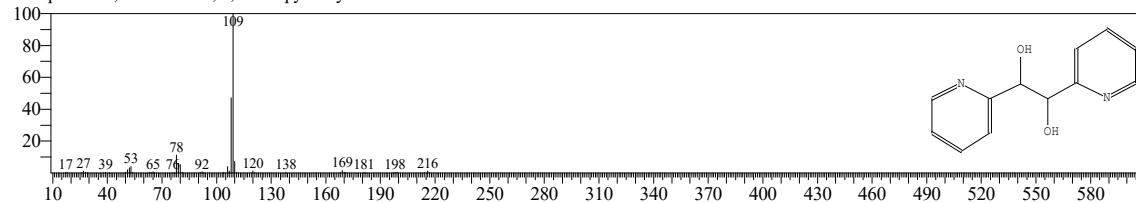

<< Target >>

Line#:53 R.Time:44.795(Scan#:8400) Retention Index:1798 MassPeaks:373

RawMode:Averaged 44.610-44.910(8363-8423) BasePeak:109.10(333670)

BG Mode:Calc. from Peak Group 1 - Event 1 Scan

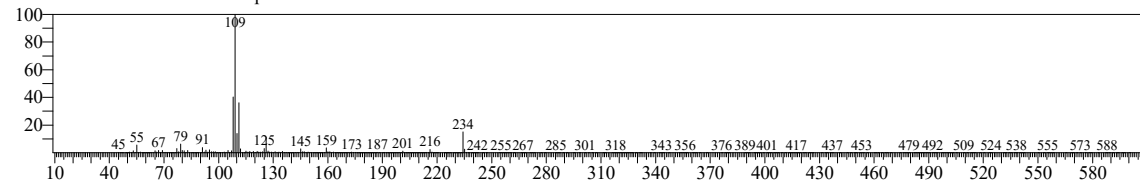

Hit#:5 Entry:250897 Library:W11N17MAIN1.lib

SI:75 Formula:C16H26 CAS:51999-35-0 MolWeight:218 RetIndex:1571

CompName:1,2,3,1',2',3'-Hexamethyl-bicyclopentyl-2,2'-diene

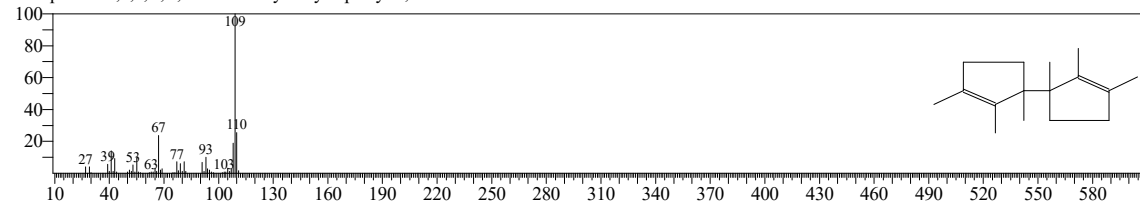

Hit#:6 Entry:89613 Library:NIST17.lib

SI:75 Formula:C16H26 CAS:51999-35-0 MolWeight:218 RetIndex:1571

CompName:1,2,3,1',2',3'-Hexamethyl-bicyclopentyl-2,2'-diene

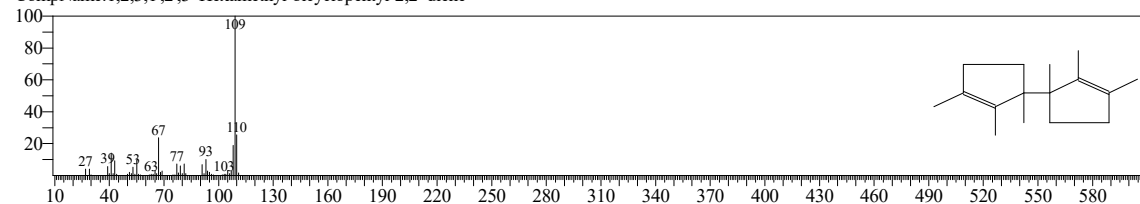

Hit#:7 Entry:193127 Library:NIST17.lib

SI:74 Formula:C18H21NO4 CAS:477-20-3 MolWeight:315 RetIndex:2415

CompName:Lycorenan-7-one,9,10-dimethoxy-1-methyl-

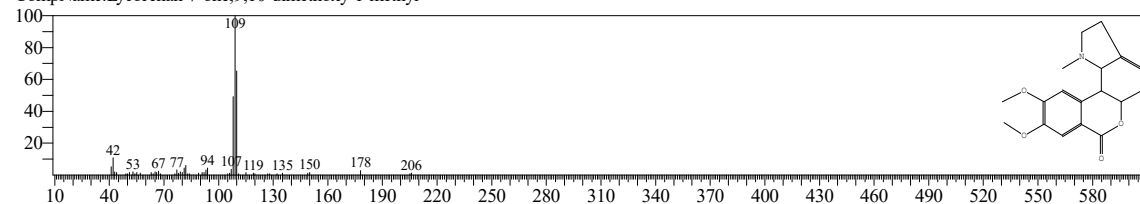

Hit#:8 Entry:13038 Library:W11N17MAIN1.lib

SI:74 Formula:CH7ClSi2 CAS:32832-35-2 MolWeight:110 RetIndex:0

CompName:Silane, chloro(silylmethyl)-

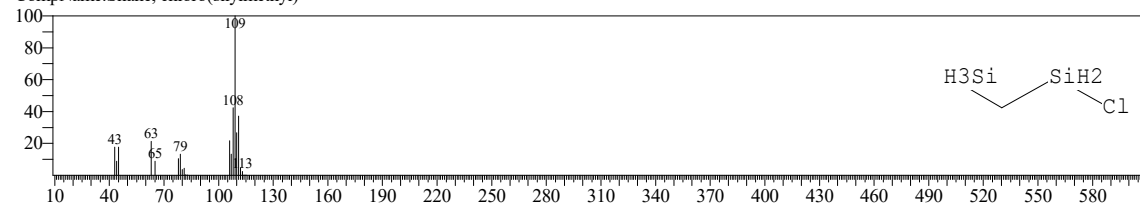

<< Target >>

Line#:53 R.Time:44.795(Scan#:8400) Retention Index:1798 MassPeaks:373

RawMode:Averaged 44.610-44.910(8363-8423) BasePeak:109.10(333670)

BG Mode:Calc. from Peak Group 1 - Event 1 Scan

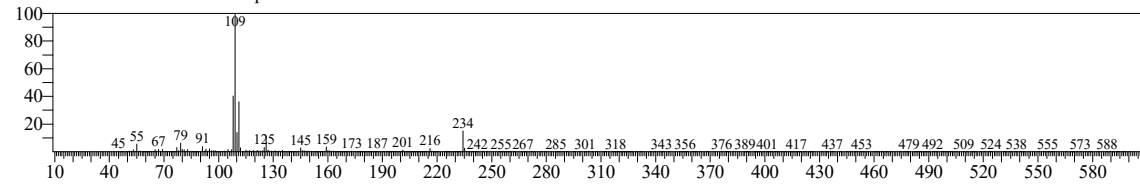

Hit#:9 Entry:48194 Library:W11N17MAIN2.lib

SI:74 Formula:C18H21NO4 CAS:477-20-3 MolWeight:315 RetIndex:2415

CompName:Lycorenan-7-one,9,10-dimethoxy-1-methyl-

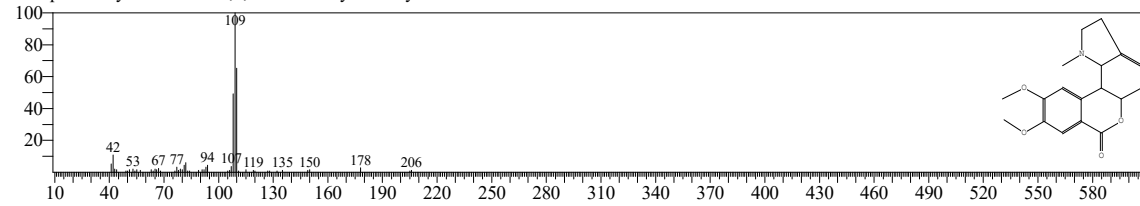

Hit#:10 Entry:152765 Library:W11N17MAIN2.lib

SI:74 Formula:C19H23ClO4 CAS:0-00-0 MolWeight:350 RetIndex:2579

CompName:Succinic acid, 4-chloro-3-methylphenyl (2-methylcyclohex-1-en-1-yl)methyl ester

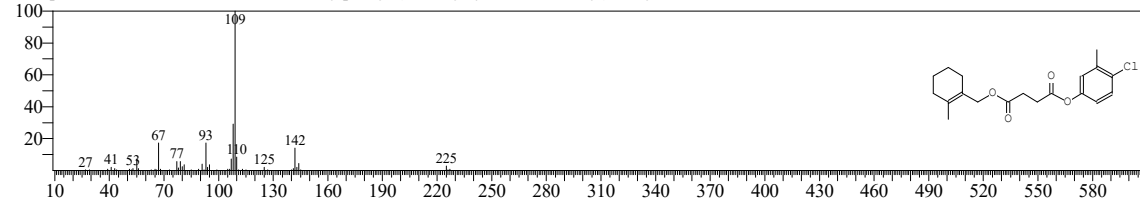

<< Target >>

Line#:54 R.Time:45.020(Scan#:8445) Retention Index:1805 MassPeaks:328

RawMode:Averaged 44.910-45.135(8423-8468) BasePeak:109.10(162292)

BG Mode:Calc. from Peak Group 1 - Event 1 Scan

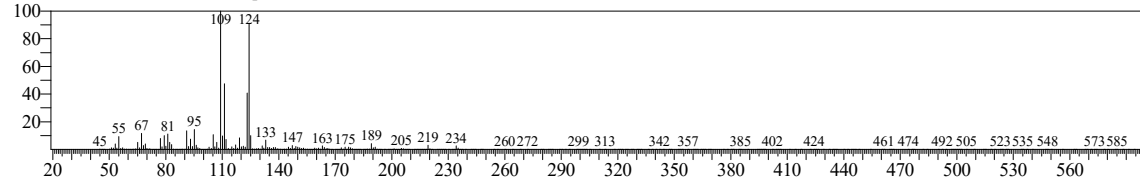

Hit#:1 Entry:306047 Library:W11N17MAIN1.lib

SI:88 Formula:C15H22O2 CAS:19906-72-0 MolWeight:234 RetIndex:1802

CompName:Spiro[furan-3(2H),2'-indan]-2-one, 3'a,4,4',5,5',6',7',7'a.beta.-octahydro-3'a.beta.,4'.beta.-dimethyl-4-methylene-, (2'R)-

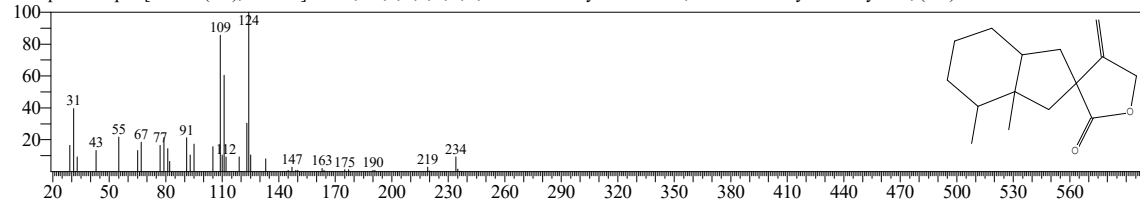

Hit#:2 Entry:306048 Library:W11N17MAIN1.lib

SI:86 Formula:C15H22O2 CAS:19906-72-0 MolWeight:234 RetIndex:1802

CompName:Spiro[furan-3(2H),2'-[2H]inden]-2-one, decahydro-3'a,4'-dimethyl-4-methylene-, [2'R-(2'.alpha.,3'a.alpha.,4'.alpha.,7'a.alpha.)]-

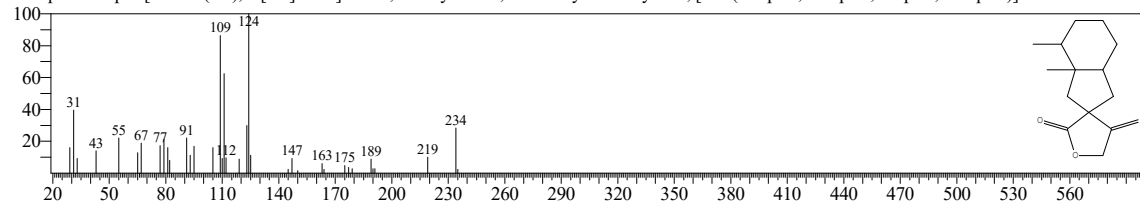

Hit#:3 Entry:106183 Library:NIST17.lib

SI:86 Formula:C15H22O2 CAS:19906-72-0 MolWeight:234 RetIndex:1802

CompName:Spiro[furan-3(2H),2'-[2H]inden]-2-one, decahydro-3'a,4'-dimethyl-4-methylene-, [2'R-(2'.alpha.,3'a.alpha.,4'.alpha.,7'a.alpha.)]-

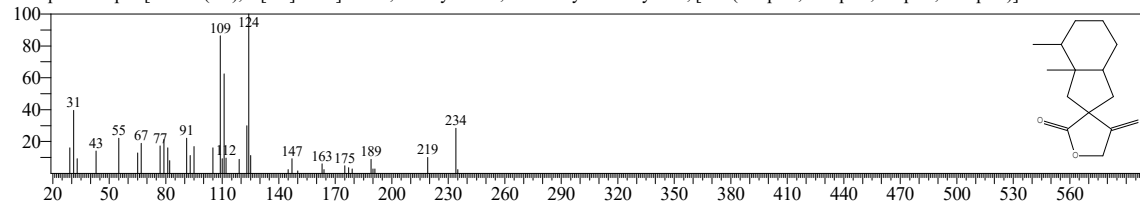

Hit#:4 Entry:306046 Library:W11N17MAIN1.lib

SI:85 Formula:C15H22O2 CAS:19906-72-0 MolWeight:234 RetIndex:1802

CompName:Spiro[furan-3(2H),2'-indan]-2-one, 3'a,4,4',5,5',6',7',7'a.beta.-octahydro-3'a.beta.,4'.beta.-dimethyl-4-methylene-, (2'R)-

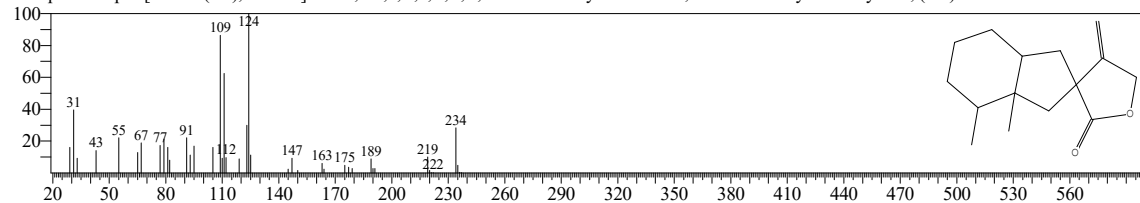



<< Target >>

Line#:54 R.Time:45.020(Scan#:8445) Retention Index:1805 MassPeaks:328

RawMode:Averaged 44.910-45.135(8423-8468) BasePeak:109.10(162292)

BG Mode:Calc. from Peak Group 1 - Event 1 Scan

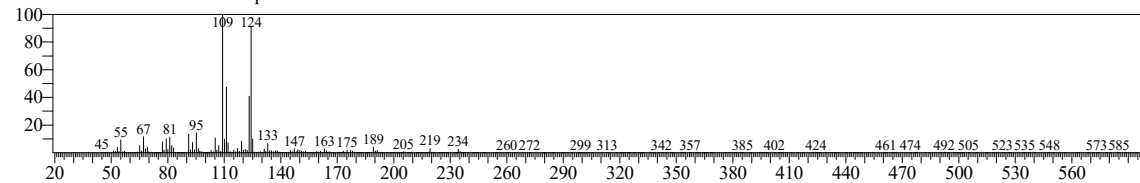

Hit#:5 Entry:305673 Library:W11N17MAIN1.lib

SI:85 Formula:C15H22O2 CAS:2326-89-8 MolWeight:234 RetIndex:1807

CompName:Drimenin

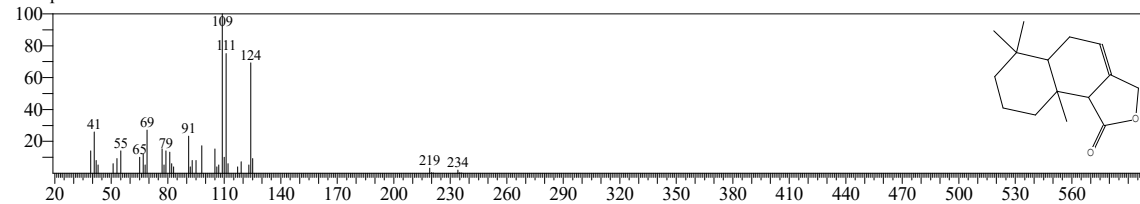

Hit#:6 Entry:106170 Library:NIST17.lib

SI:85 Formula:C15H22O2 CAS:2326-89-8 MolWeight:234 RetIndex:1807

CompName:(5a.alpha.,9a.beta.,9b.beta.)-5,5a,6,7,8,9,9a,9b-octahydro-6,6,9a-trimethylnaphtho[1,2-c]furan-1-(3H)-one (drimenin)

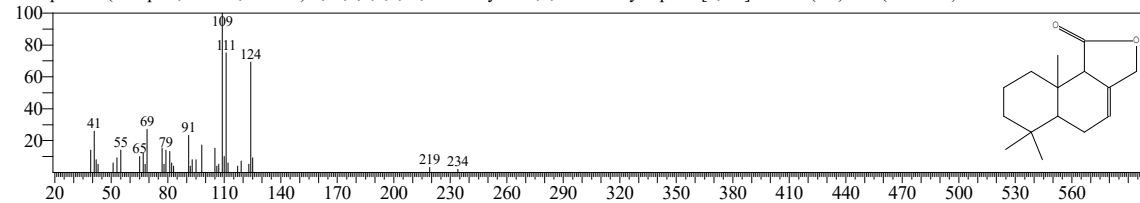

Hit#:7 Entry:305674 Library:W11N17MAIN1.lib

SI:85 Formula:C15H22O2 CAS:2326-89-8 MolWeight:234 RetIndex:1807

CompName:(5a.alpha.,9a.beta.,9b.beta.)-5,5a,6,7,8,9,9a,9b-octahydro-6,6,9a-trimethylnaphtho[1,2-c]furan-1-(3H)-one (drimenin)

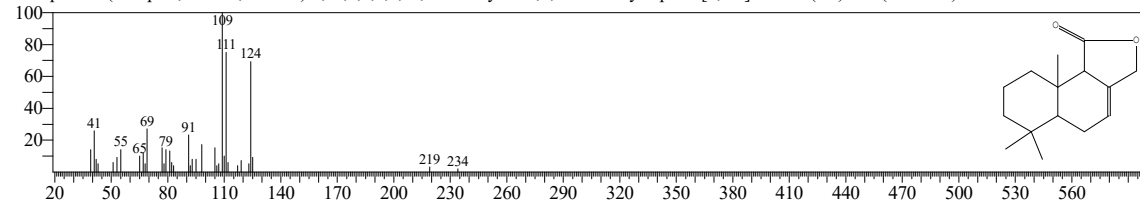

Hit#:8 Entry:54275 Library:NIST17.lib

SI:81 Formula:C11H18O2 CAS:0-00-0 MolWeight:182 RetIndex:1368

CompName:2,6,8-Trimethylbicyclo[4.2.0]oct-2-ene-1,8-diol

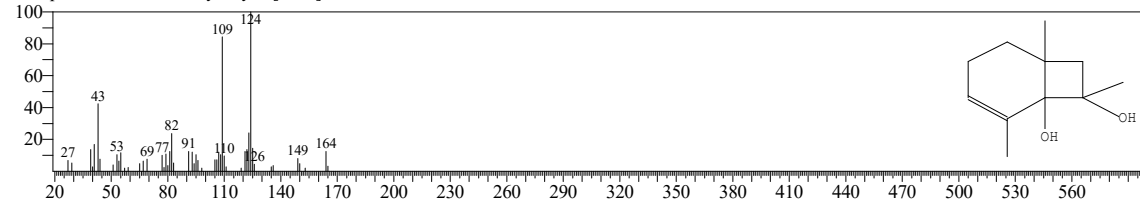

<< Target >>

Line#:54 R.Time:45.020(Scan#:8445) Retention Index:1805 MassPeaks:328

RawMode:Averaged 44.910-45.135(8423-8468) BasePeak:109.10(162292)

BG Mode:Calc. from Peak Group 1 - Event 1 Scan

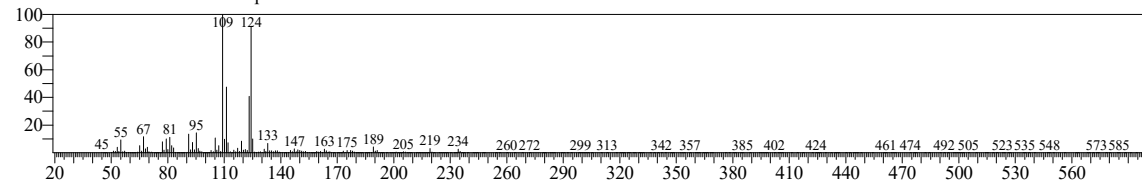

Hit#:9 Entry:138507 Library:W11N17MAIN1.lib

SI:81 Formula:C11H18O2 CAS:0-00-0 MolWeight:182 RetIndex:1368

CompName:2,6,8-Trimethylbicyclo[4.2.0]oct-2-ene-1,8-diol

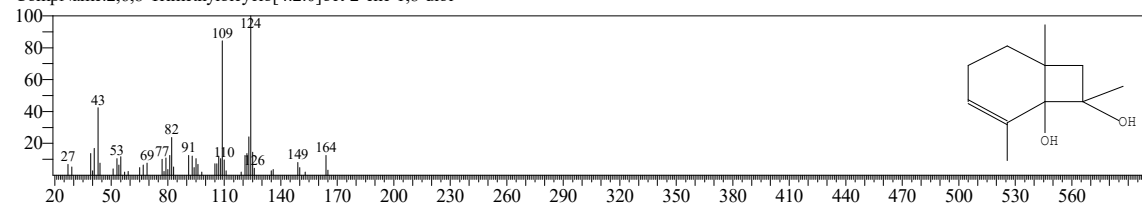

Hit#:10 Entry:205 Library:FFNSC 1.2.lib

SI:80 Formula:C15 H26 O CAS:468-68-8 MolWeight:222 RetIndex:1769

CompName:Drimenol; Naphthalenemethanol <1,4,4a,5,6,7,8,8a-octahydro-, 2,5,5,8a-tetramethyl->

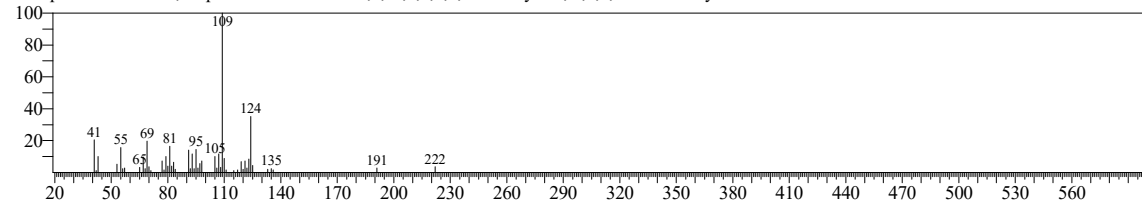

<< Target >>

Line#:55 R.Time:45.325(Scan#:8506) Retention Index:1814 MassPeaks:327

RawMode:Averaged 45.250-45.455(8491-8532) BasePeak:124.05(67216)

BG Mode:Calc. from Peak Group 1 - Event 1 Scan

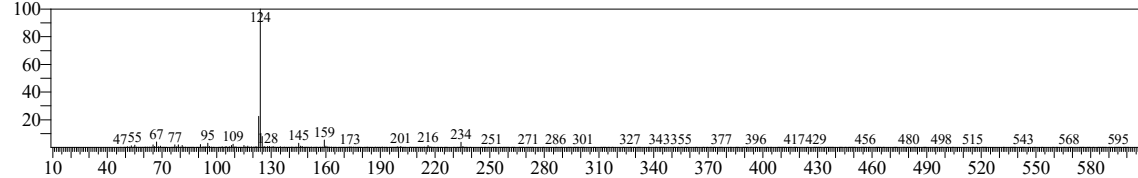

Hit#:1 Entry:148288 Library:NIST17.lib

SI:83 Formula:C15H14O3S CAS:0-00-0 MolWeight:274 RetIndex:2173

CompName:Phenylthioacetic acid, 4-methoxyphenyl ester

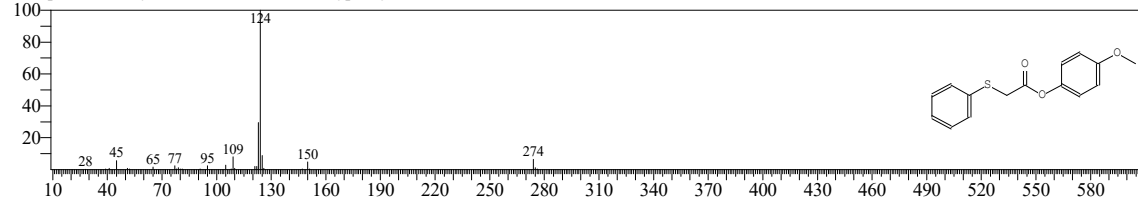

Hit#:2 Entry:446208 Library:W11N17MAIN1.lib

SI:83 Formula:C15H14O3S CAS:0-00-0 MolWeight:274 RetIndex:2173

CompName:Phenylthioacetic acid, 4-methoxyphenyl ester

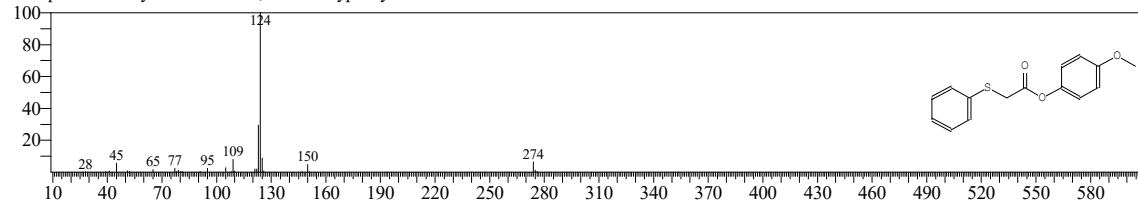

Hit#:3 Entry:39701 Library:NIST17.lib

SI:83 Formula:C9H10O3 CAS:0-00-0 MolWeight:166 RetIndex:1394

CompName:1,4-benzenediol, 2-methyl-, 4-acetate

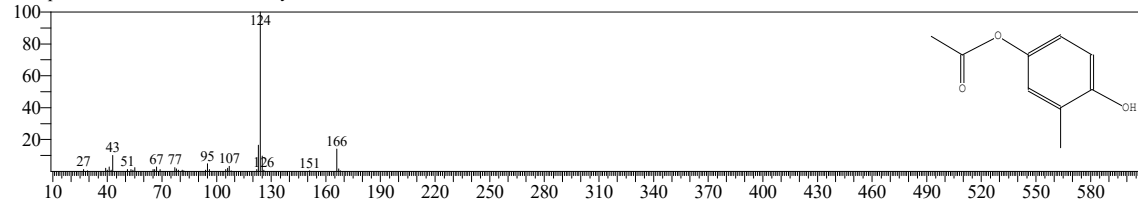

Hit#:4 Entry:96352 Library:W11N17MAIN1.lib

SI:83 Formula:C9H10O3 CAS:0-00-0 MolWeight:166 RetIndex:1394

CompName:1,4-benzenediol, 2-methyl-, 4-acetate

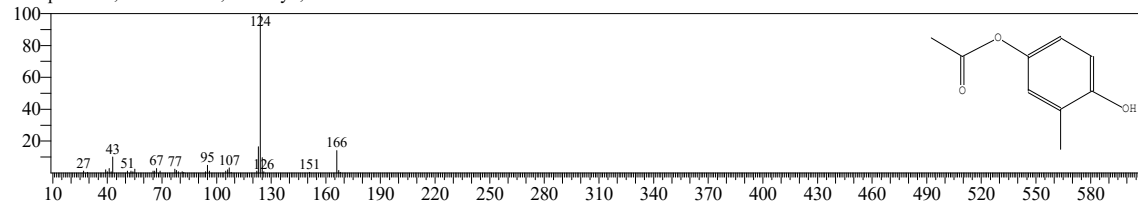

<< Target >>

Line#:55 R.Time:45.325(Scan#:8506) Retention Index:1814 MassPeaks:327

RawMode:Averaged 45.250-45.455(8491-8532) BasePeak:124.05(67216)

BG Mode:Calc. from Peak Group 1 - Event 1 Scan

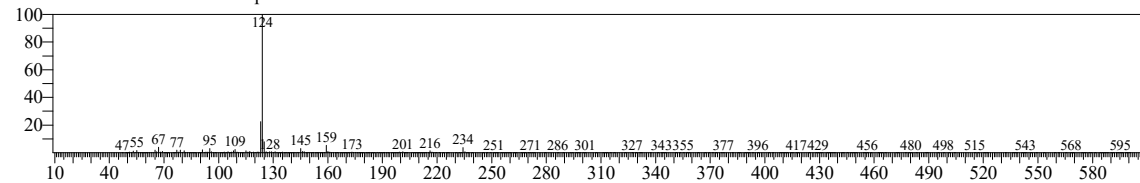

Hit#:5 Entry:215461 Library:W11N17MAIN1.lib

SI:81 Formula:C11H12O4 CAS:0-00-0 MolWeight:208 RetIndex:1553

CompName:Orcinol, diacetate

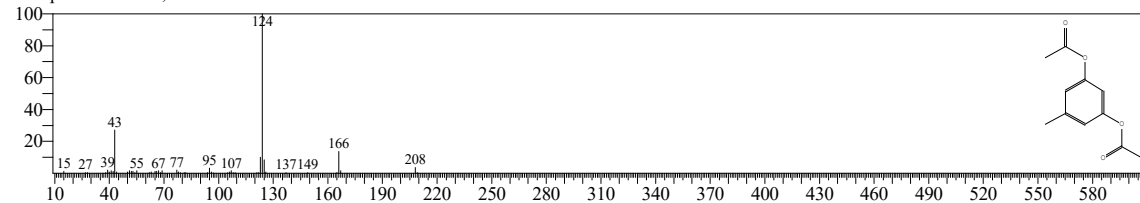

Hit#:6 Entry:78839 Library:NIST17.lib

SI:81 Formula:C11H12O4 CAS:0-00-0 MolWeight:208 RetIndex:1553

CompName:Orcinol, diacetate

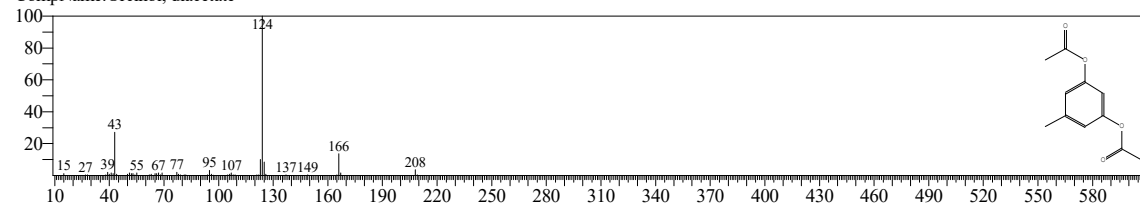

Hit#:7 Entry:354764 Library:W11N17MAIN1.lib

SI:81 Formula:C15H20O3 CAS:0-00-0 MolWeight:248 RetIndex:1889

CompName:3-Cyclopentylpropionic acid, 4-methoxyphenyl ester

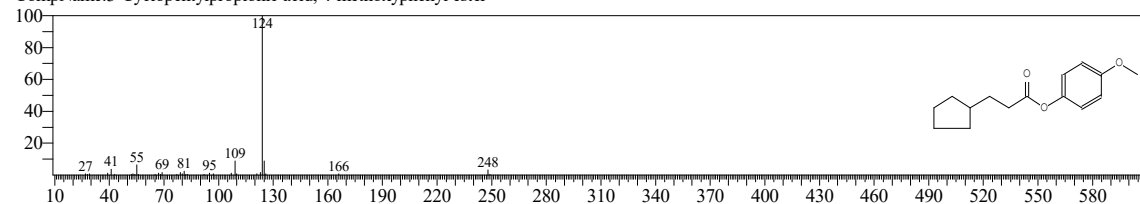

Hit#:8 Entry:120607 Library:NIST17.lib

SI:81 Formula:C15H20O3 CAS:0-00-0 MolWeight:248 RetIndex:1889

CompName:3-Cyclopentylpropionic acid, 4-methoxyphenyl ester

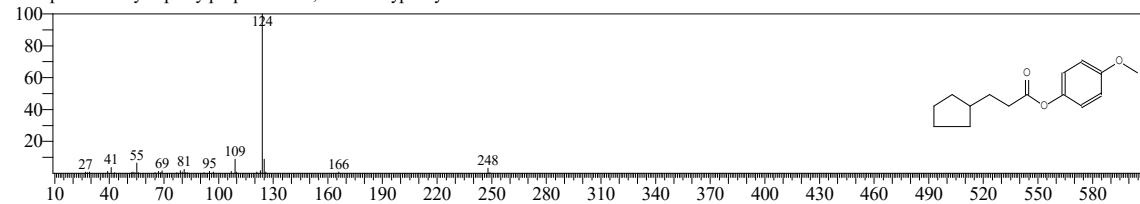

<< Target >>

Line#:55 R.Time:45.325(Scan#:8506) Retention Index:1814 MassPeaks:327

RawMode:Averaged 45.250-45.455(8491-8532) BasePeak:124.05(67216)

BG Mode:Calc. from Peak Group 1 - Event 1 Scan

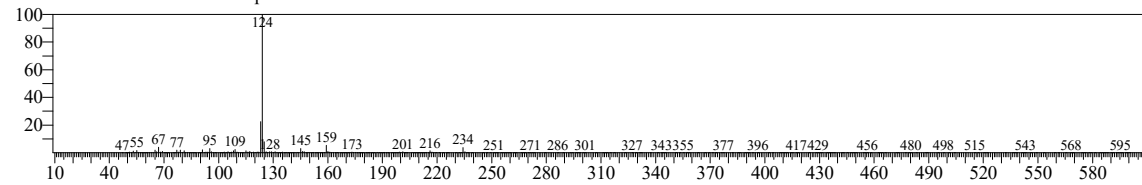

Hit#:9 Entry:96325 Library:W11N17MAIN1.lib

SI:81 Formula:C9H10O3 CAS:0-00-0 MolWeight:166 RetIndex:1394

CompName:Orcinol, monoacetate

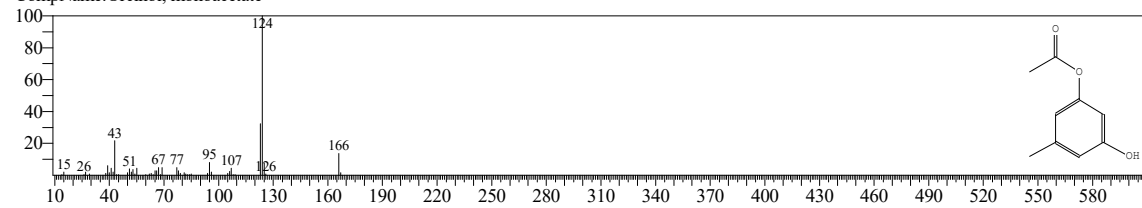

Hit#:10 Entry:39700 Library:NIST17.lib

SI:81 Formula:C9H10O3 CAS:0-00-0 MolWeight:166 RetIndex:1394

CompName:Orcinol, monoacetate

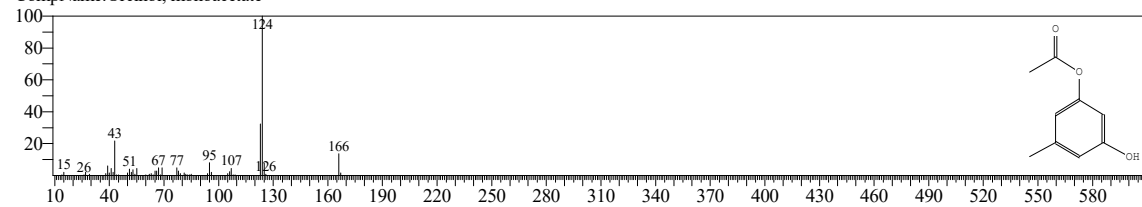

<< Target >>

Line#:56 R.Time:45.730(Scan#:8587) Retention Index:1826 MassPeaks:332

RawMode:Averaged 45.675-45.775(8576-8596) BasePeak:155.10(1835)

BG Mode:Calc. from Peak Group 1 - Event 1 Scan

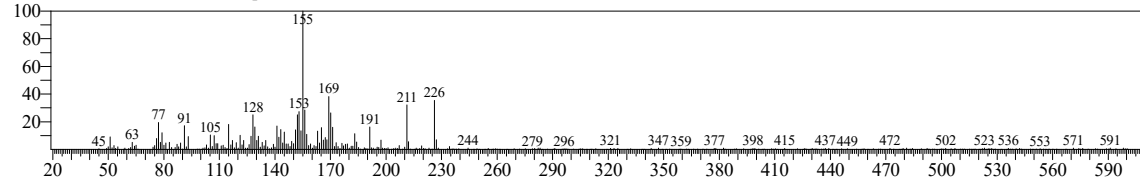

Hit#:1 Entry:98549 Library:NIST17.lib

SI:72 Formula:C17H22 CAS:0-00-0 MolWeight:226 RetIndex:1717

CompName:Cyclopropane, 1-butyl-2,2-dimethyl-1-phenylethynyl-

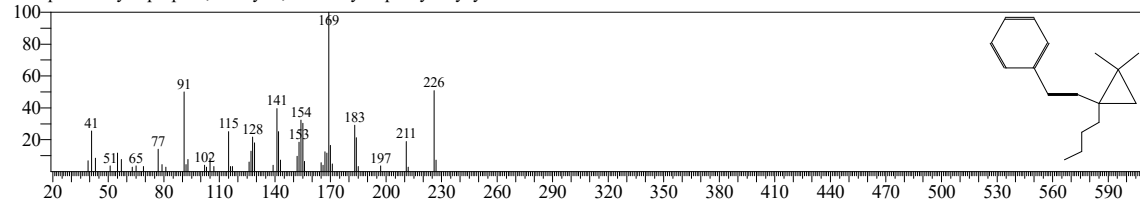

Hit#:2 Entry:280484 Library:W11N17MAIN1.lib

SI:72 Formula:C17H22 CAS:0-00-0 MolWeight:226 RetIndex:1717

CompName:Cyclopropane, 1-butyl-2,2-dimethyl-1-phenylethynyl-

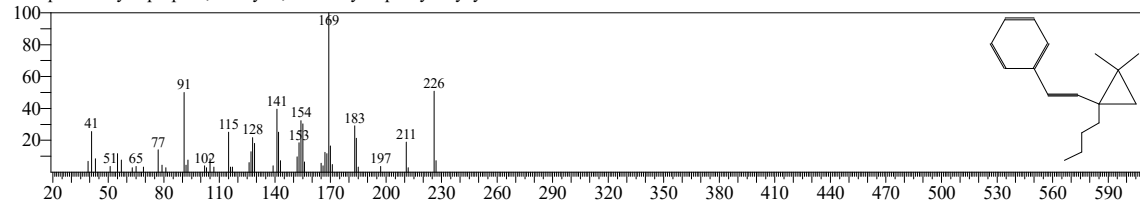

Hit#:3 Entry:280485 Library:W11N17MAIN1.lib

SI:71 Formula:C17H22 CAS:0-00-0 MolWeight:226 RetIndex:1717

CompName:Cyclopropane, 1-butyl-2,2-dimethyl-1-phenylethynyl-

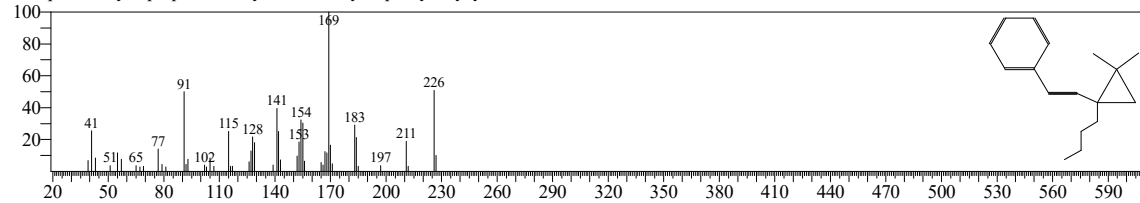

Hit#:4 Entry:280489 Library:W11N17MAIN1.lib

SI:68 Formula:C17H22 CAS:0-00-0 MolWeight:226 RetIndex:1763

CompName:(Z)-1-(2-Isopropylphenyl)oct-3-en-1-yne

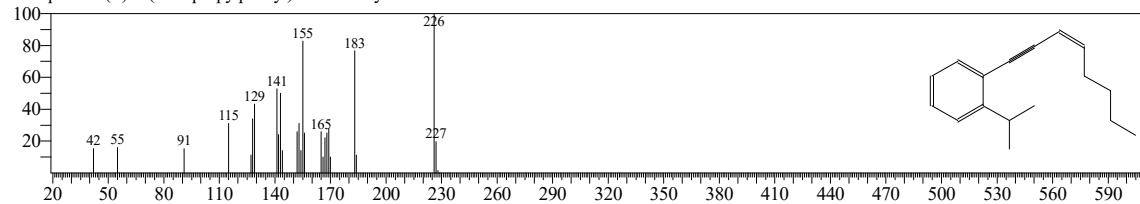

<< Target >>

Line#:56 R.Time:45.730(Scan#:8587) Retention Index:1826 MassPeaks:332

RawMode:Averaged 45.675-45.775(8576-8596) BasePeak:155.10(1835)

BG Mode:Calc. from Peak Group 1 - Event 1 Scan

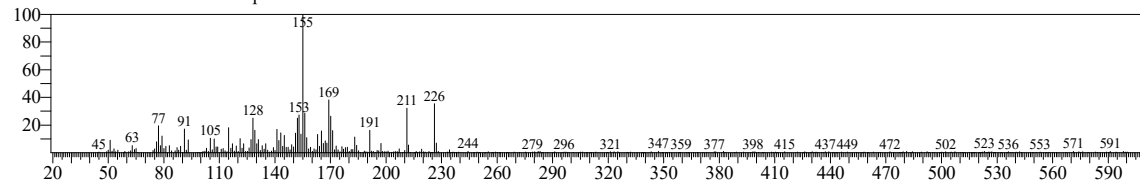

Hit#:5 Entry:280488 Library:W11N17MAIN1.lib

SI:67 Formula:C17H22 CAS:0-00-0 MolWeight:226 RetIndex:1763

CompName:(E)-1-(2-Isopropylphenyl)oct-3-en-1-yne

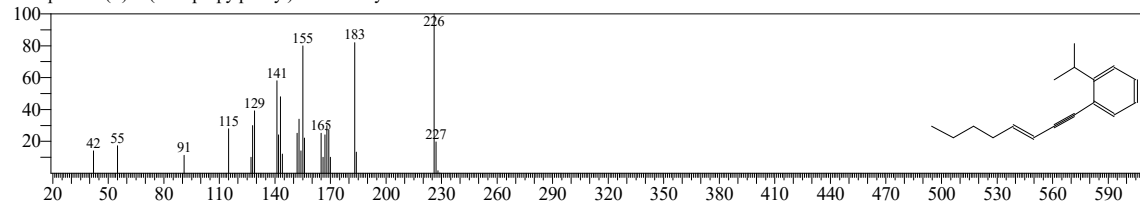

Hit#:6 Entry:231832 Library:W11N17MAIN1.lib

SI:67 Formula:C16H20 CAS:92082-63-8 MolWeight:212 RetIndex:1619

CompName:Fluoranthene, 1,2,3,6b,7,8,9,10,10a,10b-decahydro-

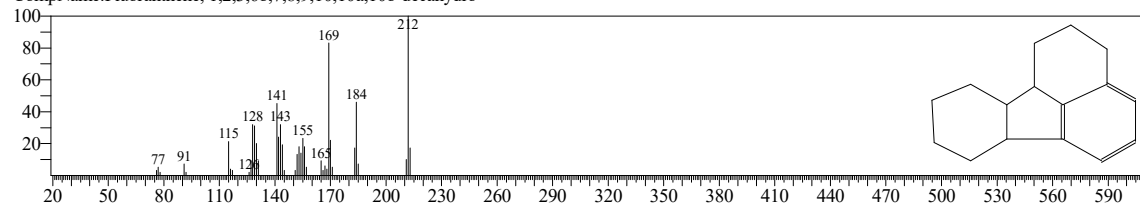

Hit#:7 Entry:83858 Library:NIST17.lib

SI:67 Formula:C16H20 CAS:92082-63-8 MolWeight:212 RetIndex:1619

CompName:Fluoranthene, 1,2,3,6b,7,8,9,10,10a,10b-decahydro-

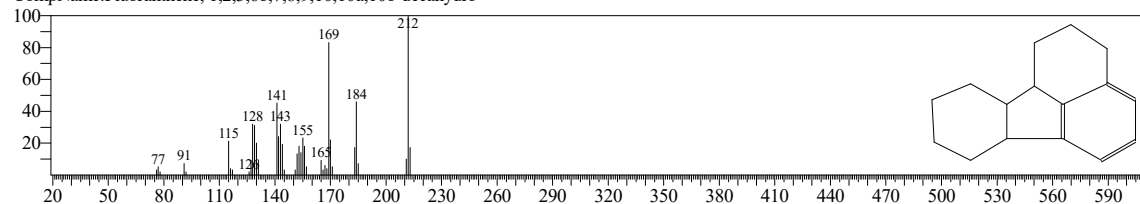

Hit#:8 Entry:231831 Library:W11N17MAIN1.lib

SI:67 Formula:C16H20 CAS:92082-63-8 MolWeight:212 RetIndex:1619

CompName:1,2,3,6b,7,8,9,10,10a,10b-Decahydrofluoranthene

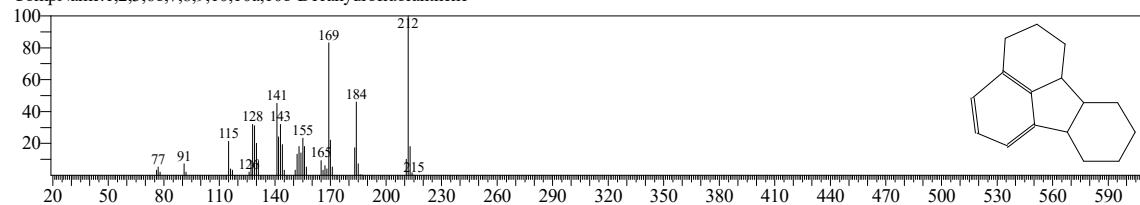

<< Target >>

Line#:56 R.Time:45.730(Scan#:8587) Retention Index:1826 MassPeaks:332

RawMode:Averaged 45.675-45.775(8576-8596) BasePeak:155.10(1835)

BG Mode:Calc. from Peak Group 1 - Event 1 Scan

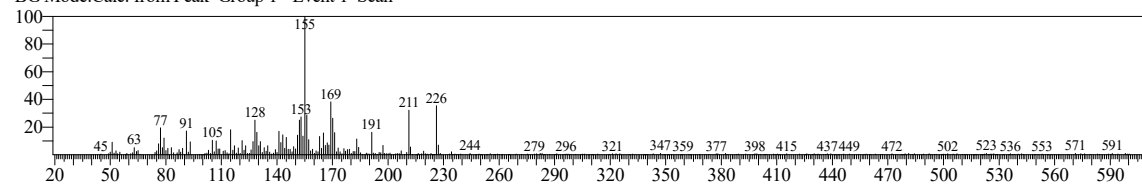

Hit#:9 Entry:145001 Library:W11N17MAIN1.lib

SI:67 Formula:C13H12O CAS:0-00-0 MolWeight:184 RetIndex:1370

CompName:exo-anti-3-Phenyl-8-oxatricyclo[3.2.1.0(2,4)]oct-6-ene

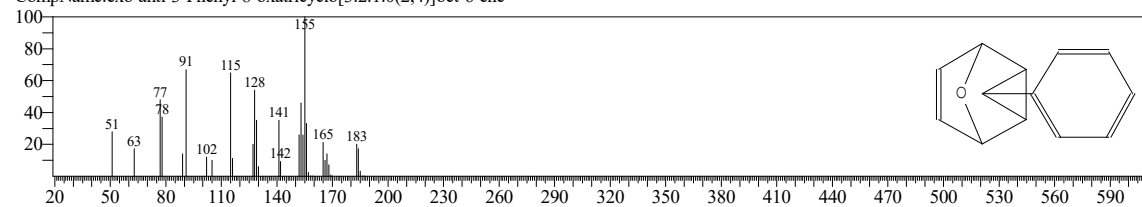

Hit#:10 Entry:280208 Library:W11N17MAIN1.lib

SI:66 Formula:C16H18O CAS:0-00-0 MolWeight:226 RetIndex:1910

CompName:Bicyclo[4.3.0]nonan-2-one, 8-benzylidene-, Z,E-

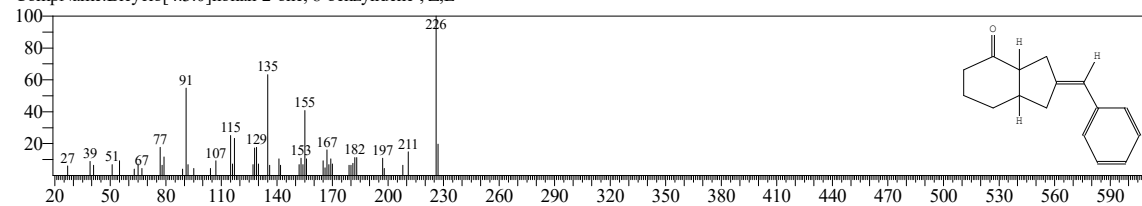



<< Target >>

Line#:57 R.Time:45.795(Scan#:8600) Retention Index:1828 MassPeaks:235

RawMode:Averaged 45.775-45.865(8596-8614) BasePeak:68.10(880)

BG Mode:Calc. from Peak Group 1 - Event 1 Scan

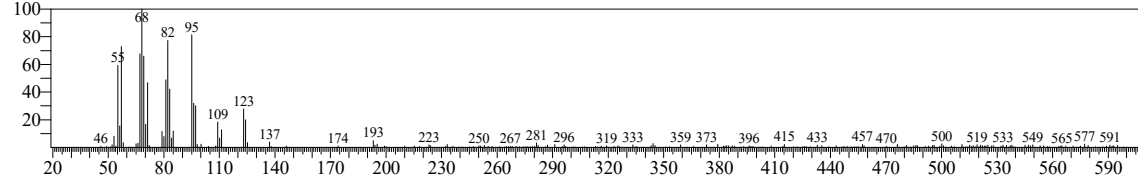

Hit#:1 Entry:908 Library:FFNSC 1.2.lib

SI:92 Formula:C20H38 CAS:504-96-1 MolWeight:278 RetIndex:1836

CompName:Neophytadiene; Hexadecene <7,11,15-trimethyl-, 3-methylene->

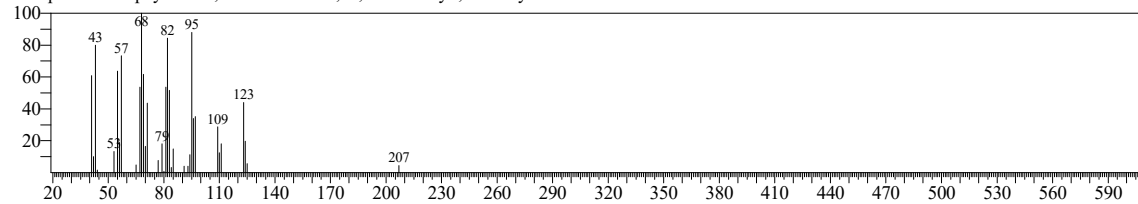

Hit#:2 Entry:152927 Library:NIST17.lib

SI:92 Formula:C20H38 CAS:504-96-1 MolWeight:278 RetIndex:1774

CompName:Neophytadiene

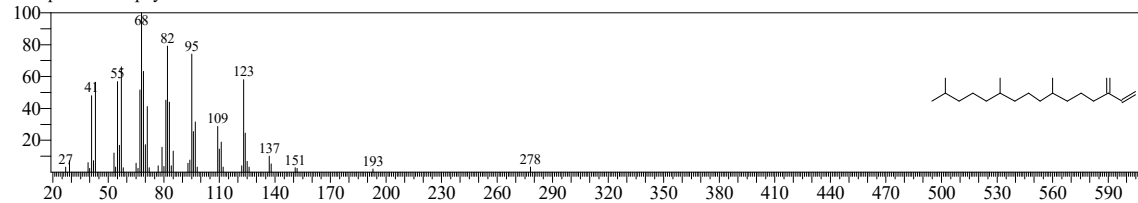

Hit#:3 Entry:462219 Library:W11N17MAIN1.lib

SI:92 Formula:C20H38 CAS:504-96-1 MolWeight:278 RetIndex:1774

CompName:Neophytadiene

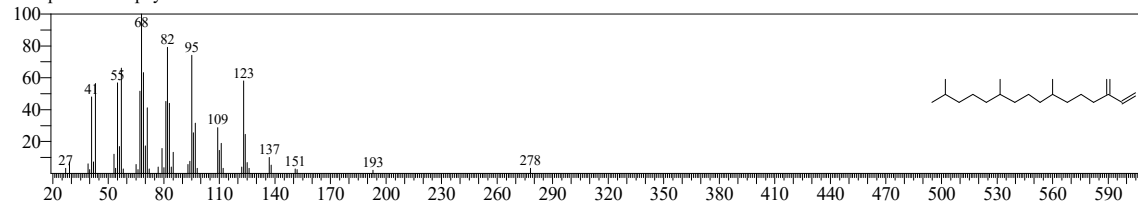

Hit#:4 Entry:462217 Library:W11N17MAIN1.lib

SI:92 Formula:C20H38 CAS:504-96-1 MolWeight:278 RetIndex:1774

CompName:Neophytadiene

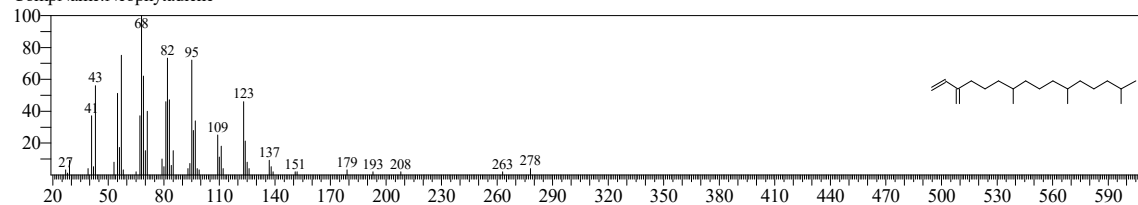

<< Target >>

Line#:57 R.Time:45.795(Scan#:8600) Retention Index:1828 MassPeaks:235

RawMode:Averaged 45.775-45.865(8596-8614) BasePeak:68.10(880)

BG Mode:Calc. from Peak Group 1 - Event 1 Scan

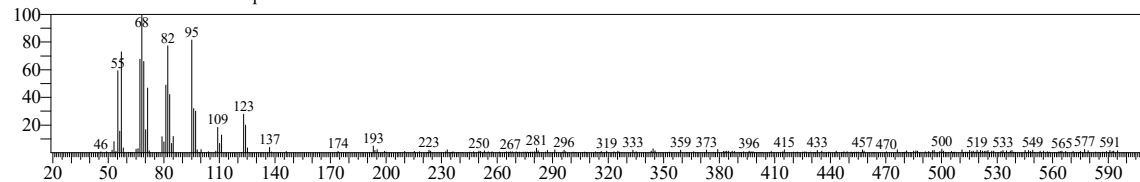

Hit#:5 Entry:1115 Library:FFNSC 1.2.lib

SI:91 Formula:C22 H42 O2 CAS:10236-16-5 MolWeight:338 RetIndex:2212

CompName:Phytol acetate; Hexadec-2-en-1-ol <3,7,11,15-tetramethyl-, (2E,7R,11R)-> acetate

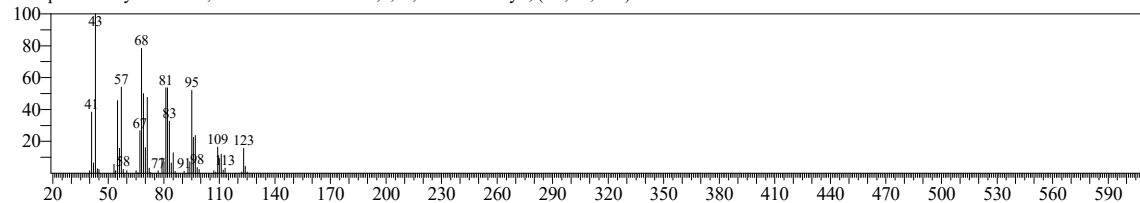

Hit#:6 Entry:120138 Library:W11N17MAIN2.lib

SI:88 Formula:C22H42O2 CAS:10236-16-5 MolWeight:338 RetIndex:2168

CompName:2-Hexadecen-1-ol, 3,7,11,15-tetramethyl-, acetate, [R-[R\*,R\*(E)]]-

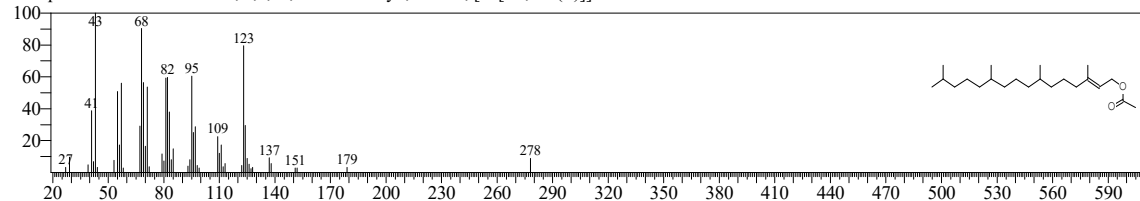

Hit#:7 Entry:217180 Library:NIST17.lib

SI:88 Formula:C22H42O2 CAS:10236-16-5 MolWeight:338 RetIndex:2168

CompName:2-Hexadecen-1-ol, 3,7,11,15-tetramethyl-, acetate, [R-[R\*,R\*(E)]]-

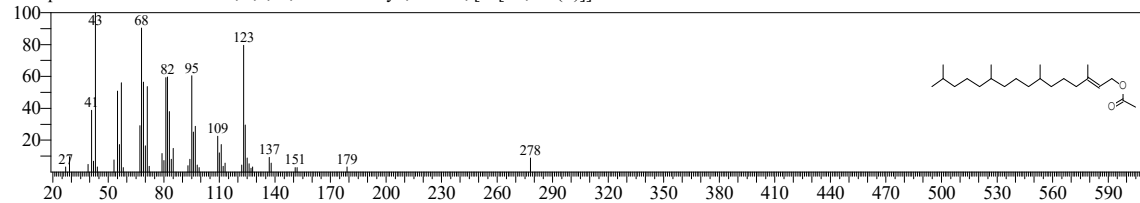

Hit#:8 Entry:462216 Library:W11N17MAIN1.lib

SI:88 Formula:C20H38 CAS:504-96-1 MolWeight:278 RetIndex:1774

CompName:Neophytadiene

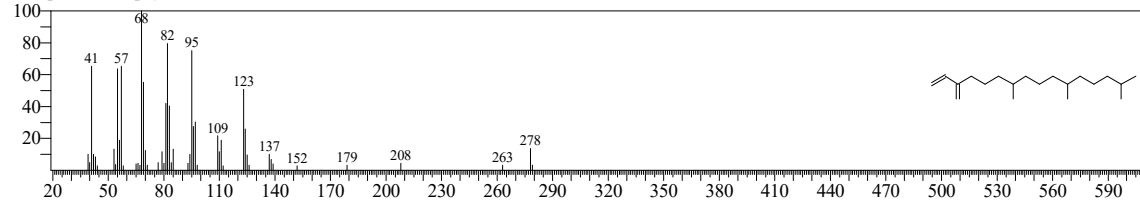

<< Target >>

Line#:57 R.Time:45.795(Scan#:8600) Retention Index:1828 MassPeaks:235

RawMode:Averaged 45.775-45.865(8596-8614) BasePeak:68.10(880)

BG Mode:Calc. from Peak Group 1 - Event 1 Scan

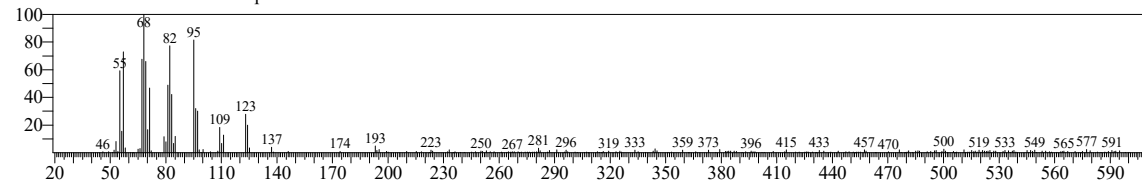

Hit#:9 Entry:524493 Library:W11N17MAIN1.lib

SI:87 Formula:C20H40O CAS:150-86-7 MolWeight:296 RetIndex:2045

CompName:2-Hexadecen-1-ol, 3,7,11,15-tetramethyl-, [R-[R\*,R\*(E)]]-

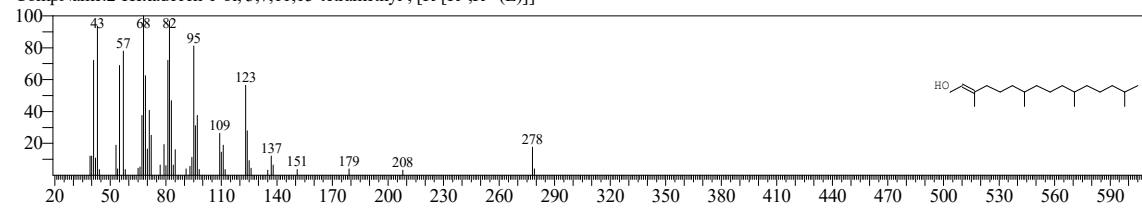

Hit#:10 Entry:98464 Library:NIST17.lib

SI:86 Formula:C15H30O CAS:2765-11-9 MolWeight:226 RetIndex:1701

CompName:Pentadecanal-

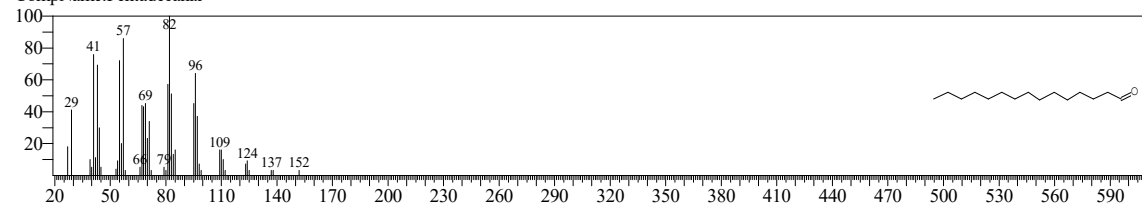

<< Target >>

Line#:58 R.Time:46.360(Scan#:8713) Retention Index:1845 MassPeaks:335

RawMode:Averaged 46.310-46.450(8703-8731) BasePeak:107.10(457)

BG Mode:Calc. from Peak Group 1 - Event 1 Scan

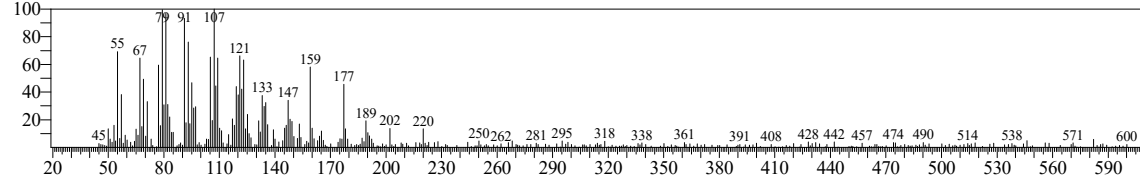

Hit#:1 Entry:258171 Library:W11N17MAIN1.lib

SI:84 Formula:C15H24O CAS:0-00-0 MolWeight:220 RetIndex:1462

CompName:Aromadendrene oxide-(2)

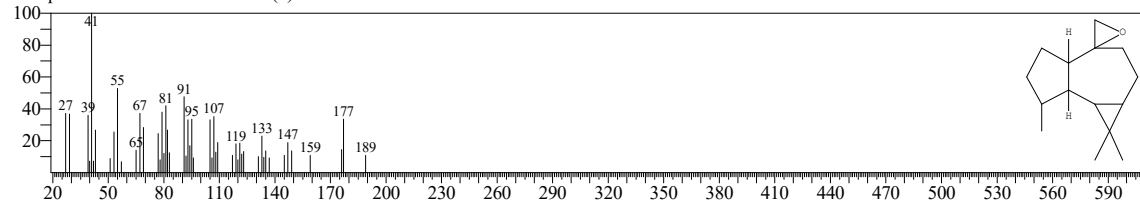

Hit#:2 Entry:258170 Library:W11N17MAIN1.lib

SI:84 Formula:C15H24O CAS:85710-39-0 MolWeight:220 RetIndex:1462

CompName:1,1,7-trimethylspiro[2,3,4a,5,6,7,7a,7b-octahydro-1aH-cyclopropa[e]azulene-4,2'-oxirane]

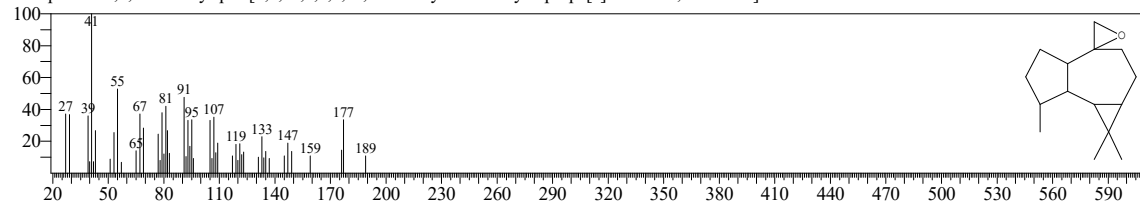

Hit#:3 Entry:91557 Library:NIST17.lib

SI:84 Formula:C15H24O CAS:0-00-0 MolWeight:220 RetIndex:1462

CompName:Aromadendrene oxide-(2)

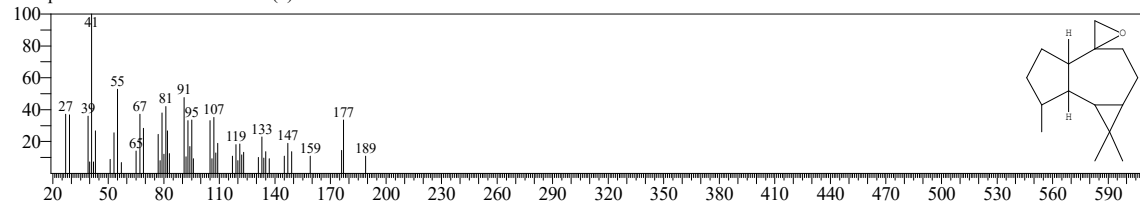

Hit#:4 Entry:91551 Library:NIST17.lib

SI:83 Formula:C15H24O CAS:0-00-0 MolWeight:220 RetIndex:1281

CompName:Isoaromadendrene epoxide

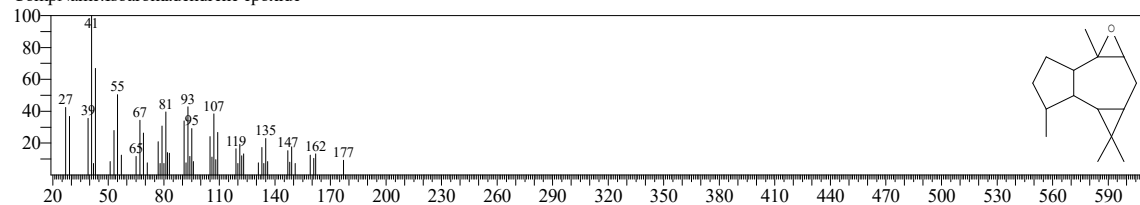

<< Target >>

Line#:58 R.Time:46.360(Scan#:8713) Retention Index:1845 MassPeaks:335

RawMode:Averaged 46.310-46.450(8703-8731) BasePeak:107.10(457)

BG Mode:Calc. from Peak Group 1 - Event 1 Scan

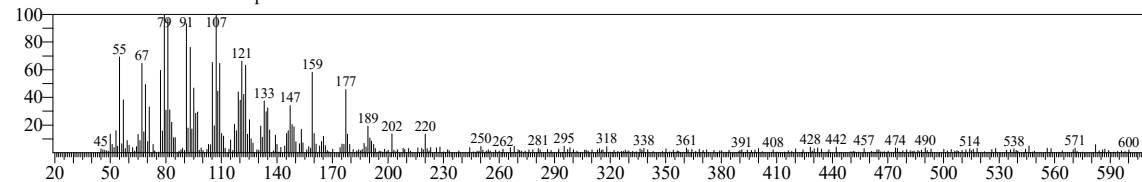

Hit#:5 Entry:257480 Library:W11N17MAIN1.lib

SI:83 Formula:C15H24O CAS:0-00-0 MolWeight:220 RetIndex:1281

CompName:Isoaromadendrene epoxide

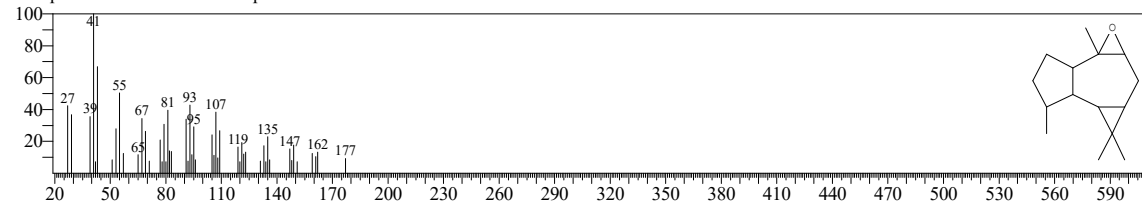

Hit#:6 Entry:257479 Library:W11N17MAIN1.lib

SI:83 Formula:C15H24O CAS:0-00-0 MolWeight:220 RetIndex:1281

CompName:Isoaromadendrene epoxide

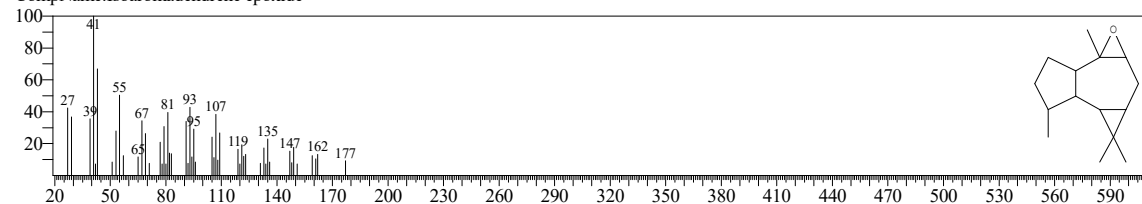

Hit#:7 Entry:258169 Library:W11N17MAIN1.lib

SI:83 Formula:C15H24O CAS:85710-39-0 MolWeight:220 RetIndex:1462

CompName:1,1,7-trimethylspiro[2,3,4a,5,6,7,7a,7b-octahydro-1aH-cyclopropa[e]azulene-4,2'-oxirane]

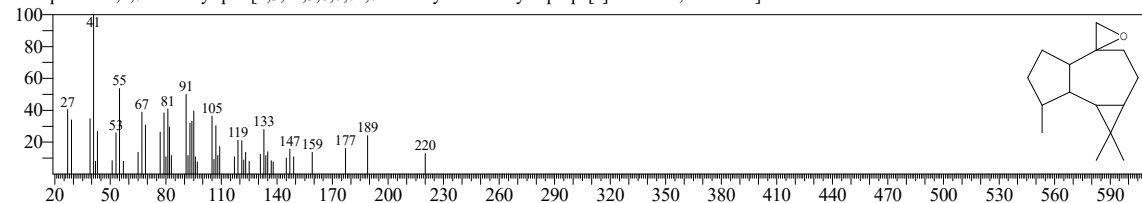

Hit#:8 Entry:91556 Library:NIST17.lib

SI:82 Formula:C15H24O CAS:0-00-0 MolWeight:220 RetIndex:1462

CompName:Aromadendrene oxide(-1)

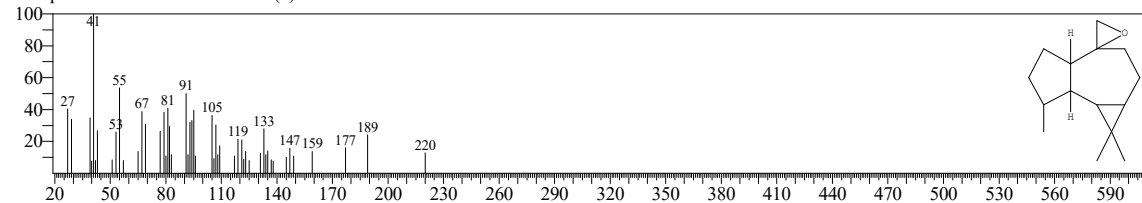

<< Target >>

Line#:58 R.Time:46.360(Scan#:8713) Retention Index:1845 MassPeaks:335

RawMode:Averaged 46.310-46.450(8703-8731) BasePeak:107.10(457)

BG Mode:Calc. from Peak Group 1 - Event 1 Scan

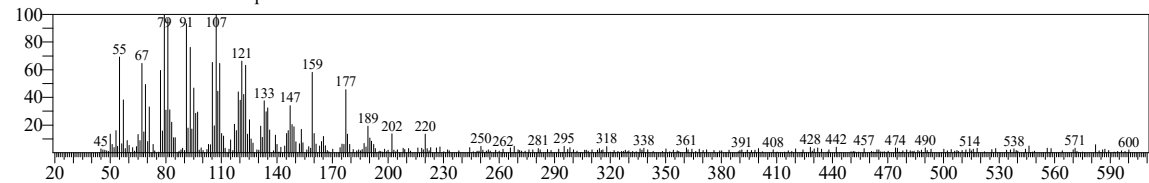

Hit#:9 Entry:258174 Library:W11N17MAIN1.lib

SI:82 Formula:C15H24O CAS:0-00-0 MolWeight:220 RetIndex:1462

CompName:Aromadendrene oxide-(1)

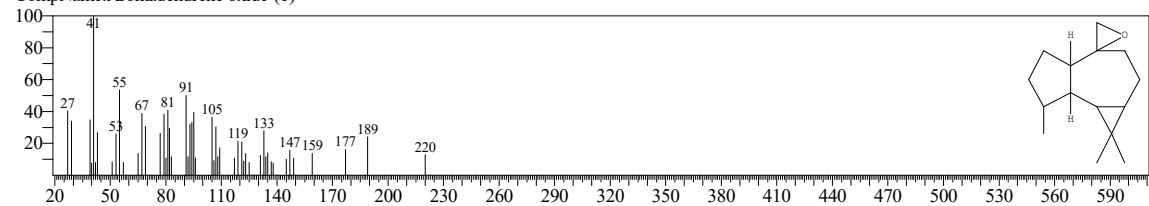

Hit#:10 Entry:265237 Library:W11N17MAIN1.lib

SI:82 Formula:C15H26O CAS:489-41-8 MolWeight:222 RetIndex:1530

CompName:(-)-Globulol

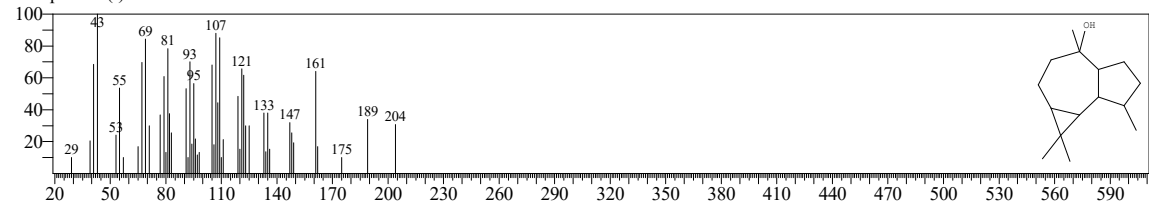

<< Target >>

Line#:59 R.Time:51.560(Scan#:9753) Retention Index:2004 MassPeaks:379

RawMode:Averaged 51.500-51.665(9741-9774) BasePeak:111.10(10463)

BG Mode:Calc. from Peak Group 1 - Event 1 Scan

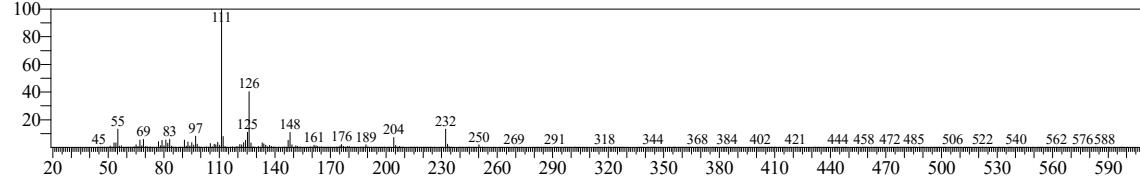

Hit#:1 Entry:138823 Library:W11N17MAIN1.lib

SI:77 Formula:C11H18O2 CAS:53690-84-9 MolWeight:182 RetIndex:1398

CompName:2-Cyclohexen-1-one, 4-butyl-3-methoxy-

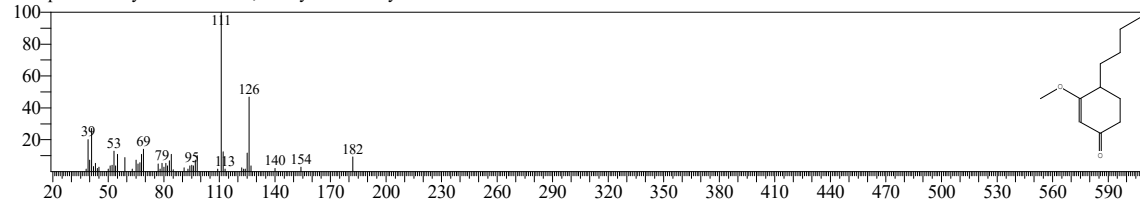

Hit#:2 Entry:54265 Library:NIST17.lib

SI:77 Formula:C11H18O2 CAS:53690-84-9 MolWeight:182 RetIndex:1398

CompName:2-Cyclohexen-1-one, 4-butyl-3-methoxy-

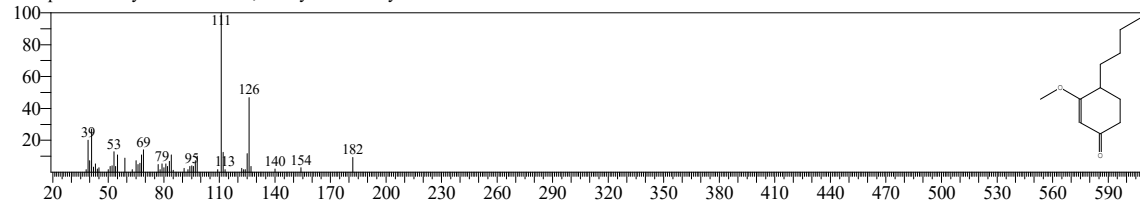

Hit#:3 Entry:27400 Library:W11N17MAIN1.lib

SI:74 Formula:C7H14N2 CAS:75011-91-5 MolWeight:126 RetIndex:983

CompName:1H-Pyrazole, 3-ethyl-4,5-dihydro-1,4-dimethyl-

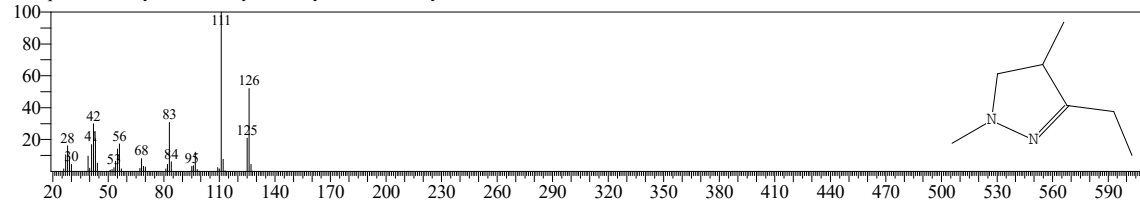

Hit#:4 Entry:27399 Library:W11N17MAIN1.lib

SI:74 Formula:C7H14N2 CAS:75011-91-5 MolWeight:126 RetIndex:983

CompName:1H-Pyrazole, 3-ethyl-4,5-dihydro-1,4-dimethyl-

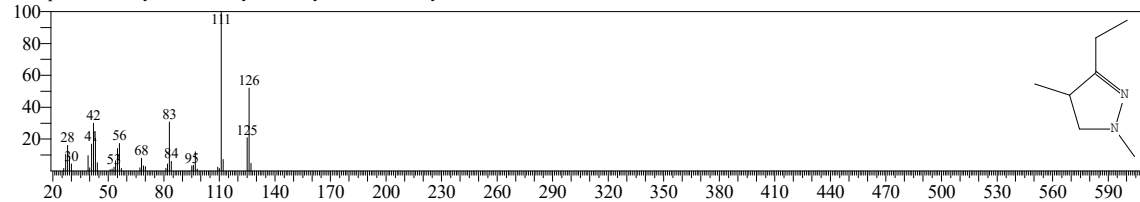

<< Target >>

Line#:59 R.Time:51.560(Scan#:9753) Retention Index:2004 MassPeaks:379

RawMode:Averaged 51.500-51.665(9741-9774) BasePeak:111.10(10463)

BG Mode:Calc. from Peak Group 1 - Event 1 Scan

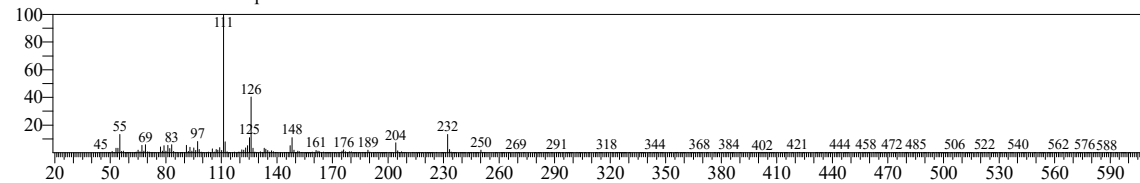

Hit#:5 Entry:12591 Library:NIST17.lib

SI:74 Formula:C7H14N2 CAS:75011-91-5 MolWeight:126 RetIndex:983

CompName:1H-Pyrazole, 3-ethyl-4,5-dihydro-1,4-dimethyl-

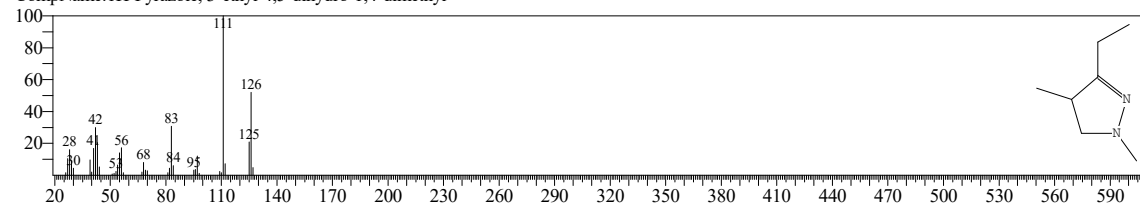

Hit#:6 Entry:497036 Library:W11N17MAIN1.lib

SI:73 Formula:C20H32O CAS:14012-11-4 MolWeight:288 RetIndex:2001

CompName:5.alpha.,14.beta.-Androstan-15-one, 17.beta.-methyl-

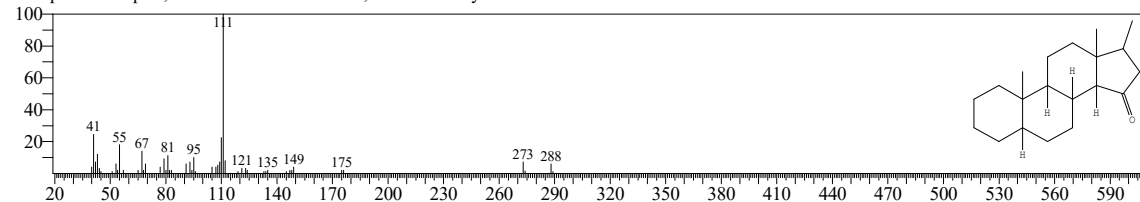

Hit#:7 Entry:27159 Library:W11N17MAIN1.lib

SI:72 Formula:C7H10O2 CAS:50598-50-0 MolWeight:126 RetIndex:1031

CompName:2(5H)-Furanone, 3,5,5-trimethyl-

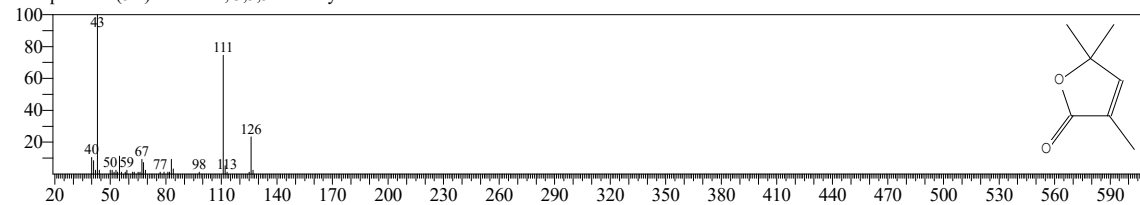

Hit#:8 Entry:12539 Library:NIST17.lib

SI:72 Formula:C7H10O2 CAS:50598-50-0 MolWeight:126 RetIndex:1031

CompName:2(5H)-Furanone, 3,5,5-trimethyl-

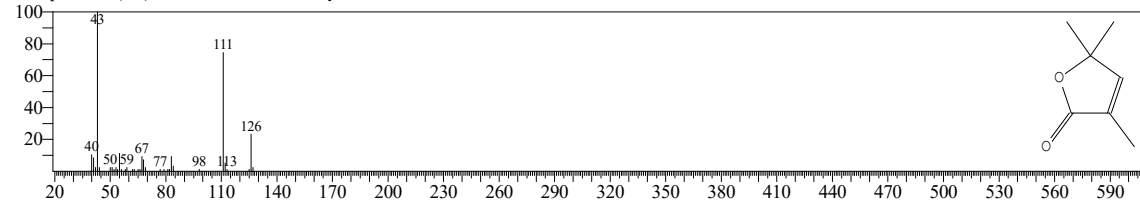



<< Target >>

Line#:59 R.Time:51.560(Scan#:9753) Retention Index:2004 MassPeaks:379

RawMode:Averaged 51.500-51.665(9741-9774) BasePeak:111.10(10463)

BG Mode:Calc. from Peak Group 1 - Event 1 Scan

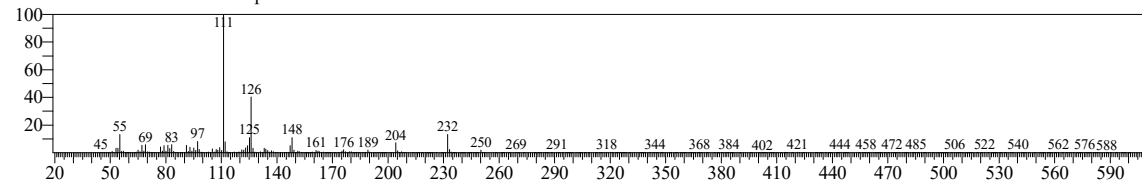

Hit#:9 Entry:27286 Library:W11N17MAIN1.lib

SI:72 Formula:C7H10O2 CAS:7180-61-2 MolWeight:126 RetIndex:980

CompName:2-Cyclopenten-1-one, 3-methoxy-4-methyl-

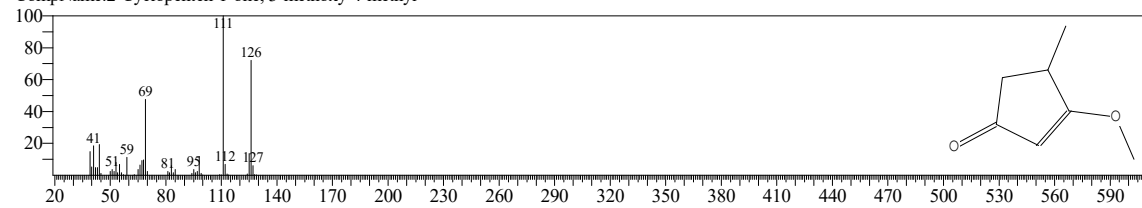

Hit#:10 Entry:27155 Library:W11N17MAIN1.lib

SI:72 Formula:C7H10O2 CAS:7180-60-1 MolWeight:126 RetIndex:980

CompName:2-Cyclopenten-1-one, 3-methoxy-5-methyl-

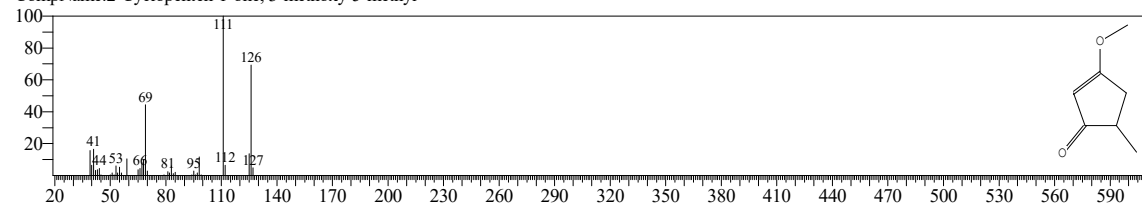

<< Target >>

Line#:60 R.Time:52.215(Scan#:9884) Retention Index:2025 MassPeaks:366

RawMode:Averaged 52.150-52.320(9871-9905) BasePeak:111.10(19308)

BG Mode:Calc. from Peak Group 1 - Event 1 Scan

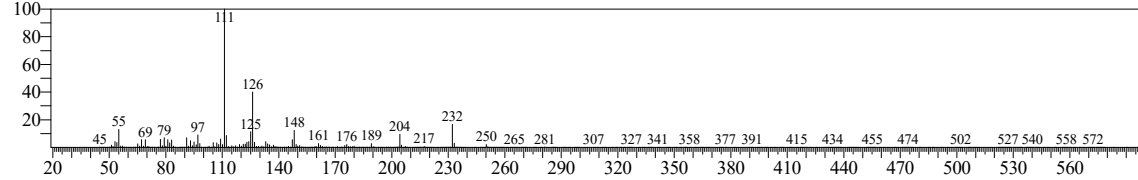

Hit#:1 Entry:54265 Library:NIST17.lib

SI:74 Formula:C<sub>11</sub>H<sub>18</sub>O<sub>2</sub> CAS:53690-84-9 MolWeight:182 RetIndex:1398

CompName:2-Cyclohexen-1-one, 4-butyl-3-methoxy-

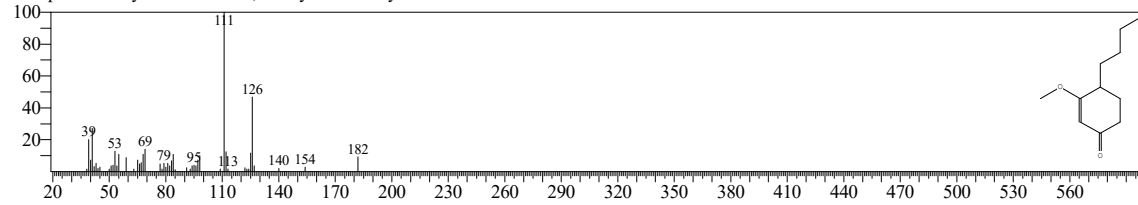

Hit#:2 Entry:138823 Library:W11N17MAIN1.lib

SI:74 Formula:C<sub>11</sub>H<sub>18</sub>O<sub>2</sub> CAS:53690-84-9 MolWeight:182 RetIndex:1398

CompName:2-Cyclohexen-1-one, 4-butyl-3-methoxy-

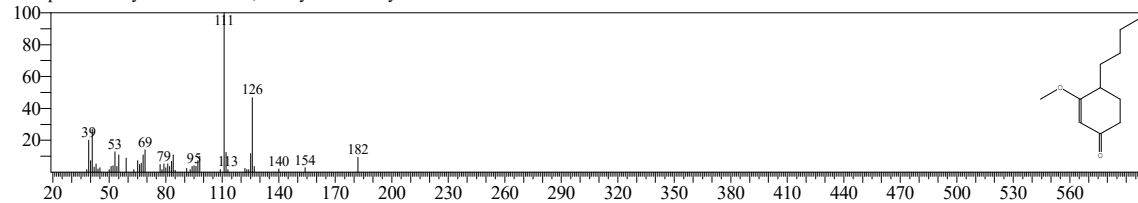

Hit#:3 Entry:497036 Library:W11N17MAIN1.lib

SI:73 Formula:C<sub>20</sub>H<sub>32</sub>O CAS:14012-11-4 MolWeight:288 RetIndex:2001

CompName:5.alpha.,14.beta.-Androstan-15-one, 17.beta.-methyl-

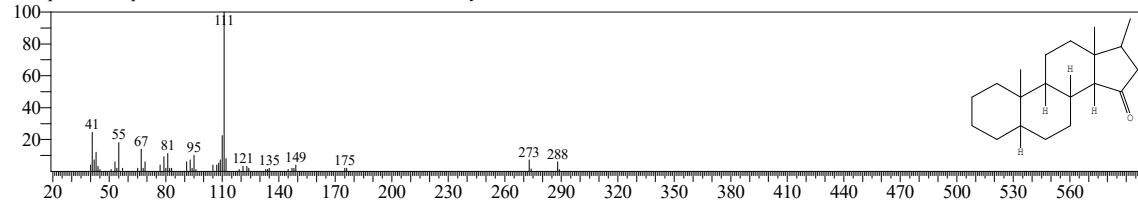

Hit#:4 Entry:27400 Library:W11N17MAIN1.lib

SI:70 Formula:C<sub>7</sub>H<sub>14</sub>N<sub>2</sub> CAS:75011-91-5 MolWeight:126 RetIndex:983

CompName:1H-Pyrazole, 3-ethyl-4,5-dihydro-1,4-dimethyl-

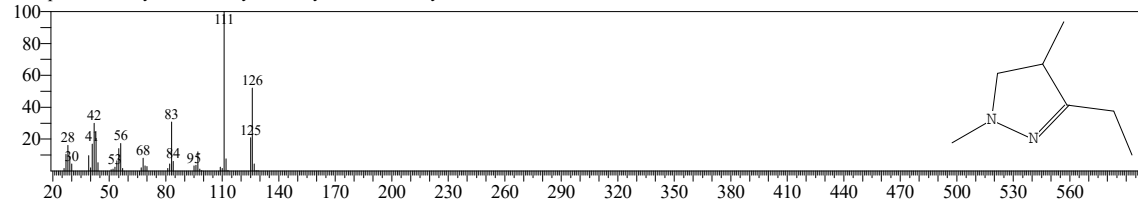

<< Target >>

Line#:60 R.Time:52.215(Scan#:9884) Retention Index:2025 MassPeaks:366

RawMode:Averaged 52.150-52.320(9871-9905) BasePeak:111.10(19308)

BG Mode:Calc. from Peak Group 1 - Event 1 Scan

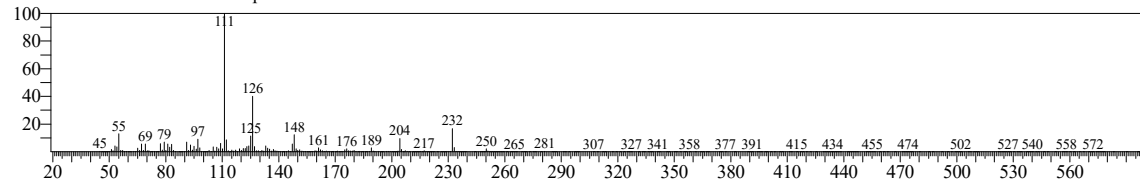

Hit#:5 Entry:27399 Library:W11N17MAIN1.lib

SI:70 Formula:C7H14N2 CAS:75011-91-5 MolWeight:126 RetIndex:983

CompName:1H-Pyrazole, 3-ethyl-4,5-dihydro-1,4-dimethyl-

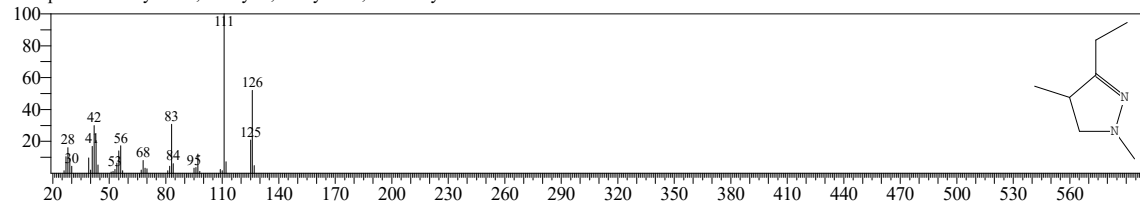

Hit#:6 Entry:12591 Library:NIST17.lib

SI:70 Formula:C7H14N2 CAS:75011-91-5 MolWeight:126 RetIndex:983

CompName:1H-Pyrazole, 3-ethyl-4,5-dihydro-1,4-dimethyl-

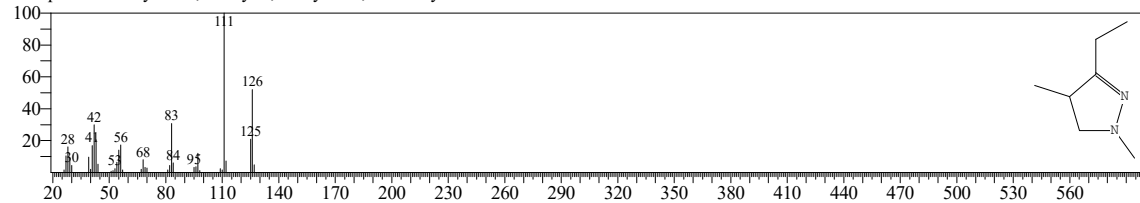

Hit#:7 Entry:102536 Library:W11N17MAIN1.lib

SI:69 Formula:C10H16O2 CAS:66921-79-7 MolWeight:168 RetIndex:1302

CompName:5-methoxy-3-bicyclo[3.3.1]nonanone

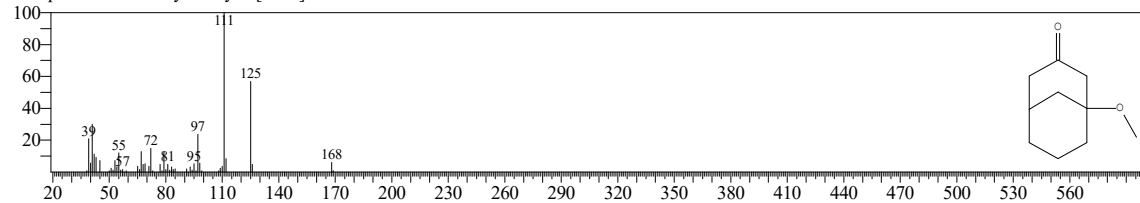

Hit#:8 Entry:94055 Library:NIST17.lib

SI:69 Formula:C15H26O CAS:913176-41-7 MolWeight:222 RetIndex:1677

CompName:Caryophyllenyl alcohol

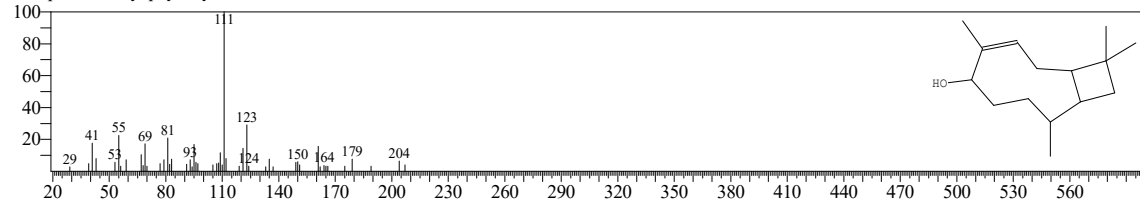

<< Target >>

Line#:60 R.Time:52.215(Scan#:9884) Retention Index:2025 MassPeaks:366

RawMode:Averaged 52.150-52.320(9871-9905) BasePeak:111.10(19308)

BG Mode:Calc. from Peak Group 1 - Event 1 Scan

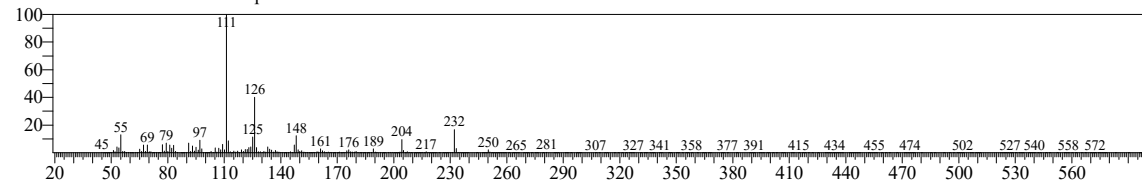

Hit#:9 Entry:265787 Library:W11N17MAIN1.lib

SI:69 Formula:C15H26O CAS:913176-41-7 MolWeight:222 RetIndex:1677

CompName:Caryophyllenyl alcohol

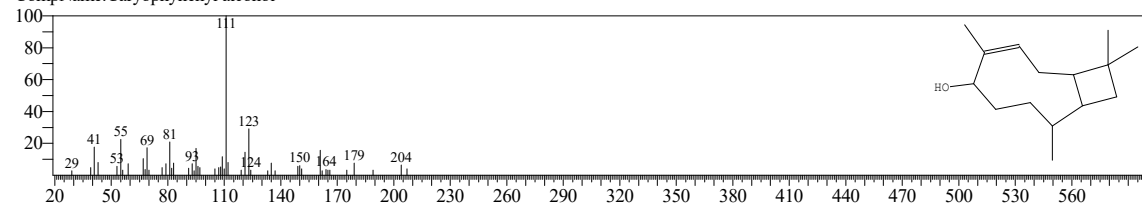

Hit#:10 Entry:27336 Library:W11N17MAIN1.lib

SI:69 Formula:C7H10S CAS:40323-88-4 MolWeight:126 RetIndex:983

CompName:2-Ethyl-5-methylthiophene

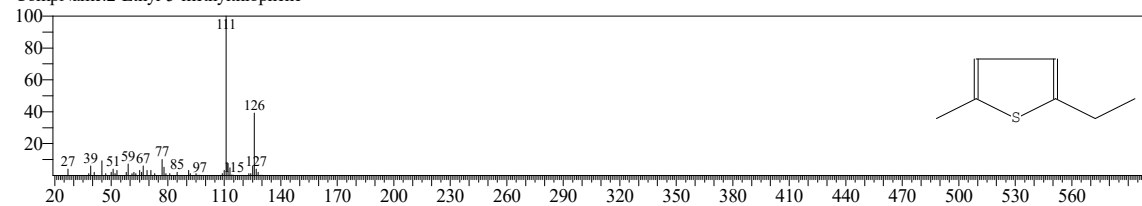

<< Target >>

Line#:61 R.Time:52.475(Scan#:9936) Retention Index:2033 MassPeaks:363

RawMode:Averaged 52.415-52.600(9924-9961) BasePeak:215.15(13275)

BG Mode:Calc. from Peak Group 1 - Event 1 Scan

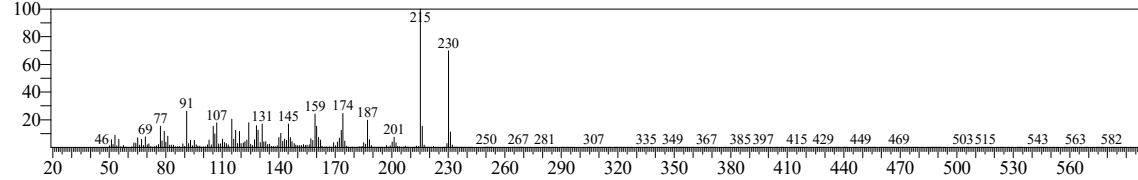

Hit#:1 Entry:292135 Library:W11N17MAIN1.lib

SI:72 Formula:C14H14O3 CAS:1020066-01-6 MolWeight:230 RetIndex:1987

CompName:3-(1,1-Dimethylallyl)-6-hydroxycoumarin

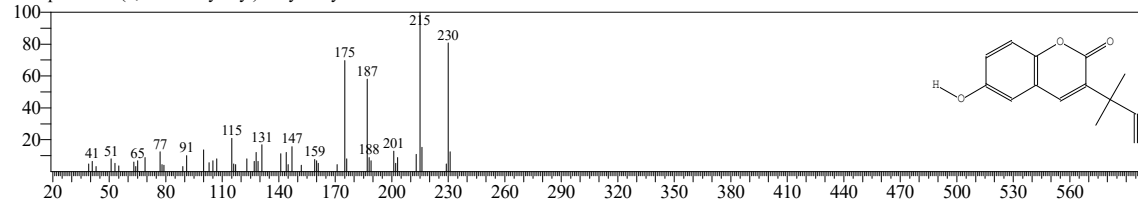

Hit#:2 Entry:102260 Library:NIST17.lib

SI:72 Formula:C14H14O3 CAS:1020066-01-6 MolWeight:230 RetIndex:1987

CompName:3-(1,1-Dimethylallyl)-6-hydroxycoumarin

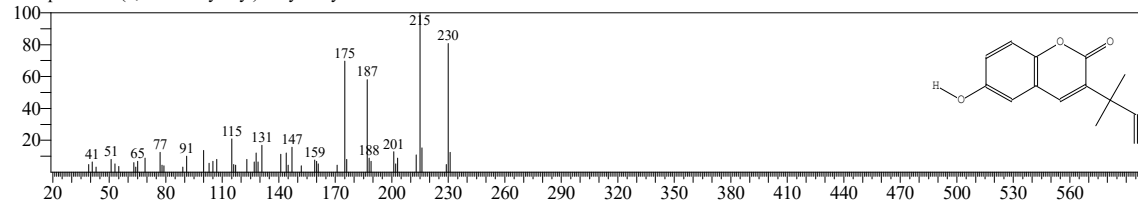

Hit#:3 Entry:102442 Library:NIST17.lib

SI:71 Formula:C16H22O CAS:0-00-0 MolWeight:230 RetIndex:1695

CompName:1,4-Hexadien-3-one, 5-methyl-1-[2,6,6-trimethyl-2,4-cyclohexadien-1-yl]-

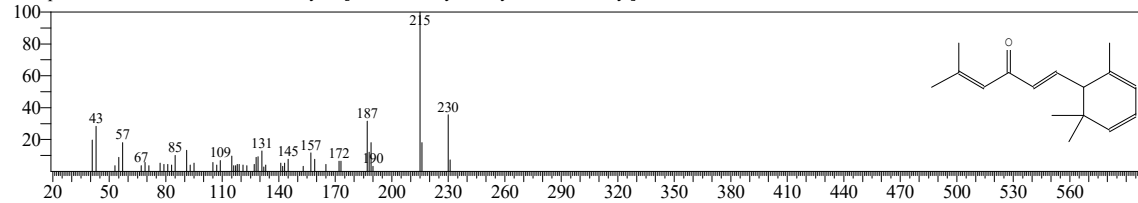

Hit#:4 Entry:293132 Library:W11N17MAIN1.lib

SI:71 Formula:C16H22O CAS:0-00-0 MolWeight:230 RetIndex:1695

CompName:1,4-Hexadien-3-one, 5-methyl-1-[2,6,6-trimethyl-2,4-cyclohexadien-1-yl]-

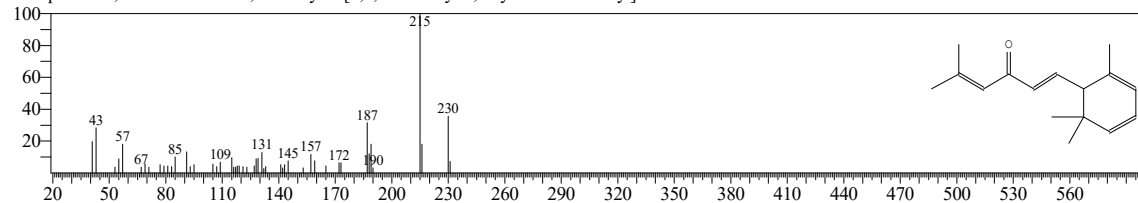

<< Target >>

Line#:61 R.Time:52.475(Scan#:9936) Retention Index:2033 MassPeaks:363

RawMode:Averaged 52.415-52.600(9924-9961) BasePeak:215.15(13275)

BG Mode:Calc. from Peak Group 1 - Event 1 Scan

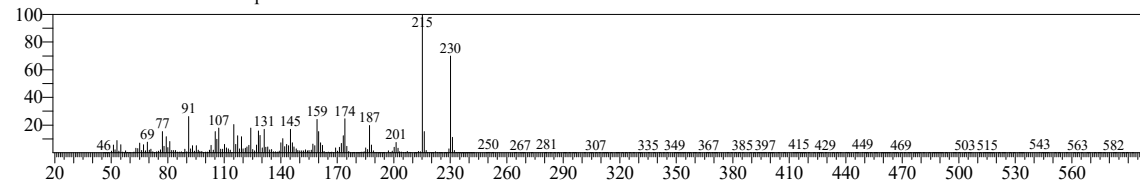

Hit#:5 Entry:102393 Library:NIST17.lib

SI:70 Formula:C15H18O2 CAS:552-96-5 MolWeight:230 RetIndex:1815

CompName:2,4,6-Cycloheptatrien-1-one, 2-hydroxy-5-(3-methyl-2-butenyl)-4-(1-methylethenyl)-

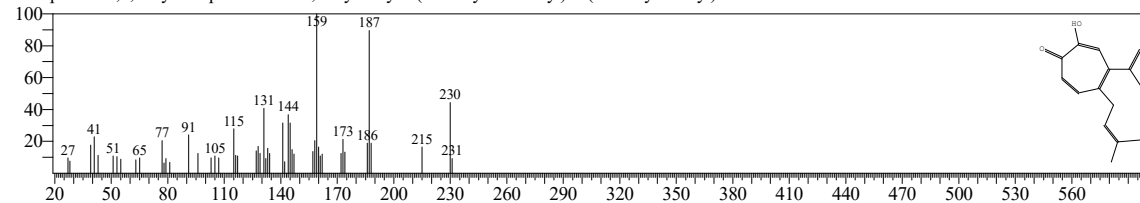

Hit#:6 Entry:292596 Library:W11N17MAIN1.lib

SI:70 Formula:C15H18O2 CAS:552-96-5 MolWeight:230 RetIndex:1815

CompName:2,4,6-Cycloheptatrien-1-one, 2-hydroxy-5-(3-methyl-2-butenyl)-4-(1-methylethenyl)-

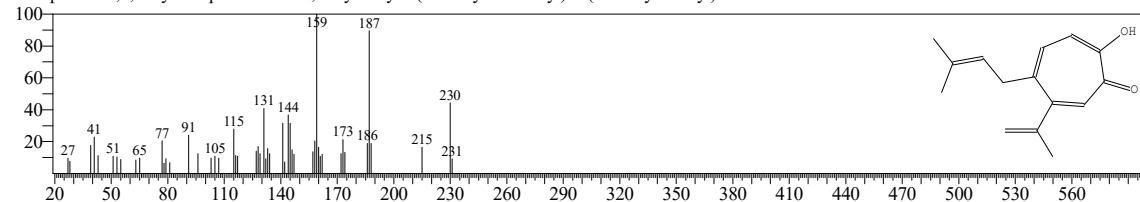

Hit#:7 Entry:292595 Library:W11N17MAIN1.lib

SI:70 Formula:C15H18O2 CAS:552-96-5 MolWeight:230 RetIndex:1815

CompName:2,4,6-Cycloheptatrien-1-one, 2-hydroxy-5-(3-methyl-2-butenyl)-4-(1-methylethenyl)-

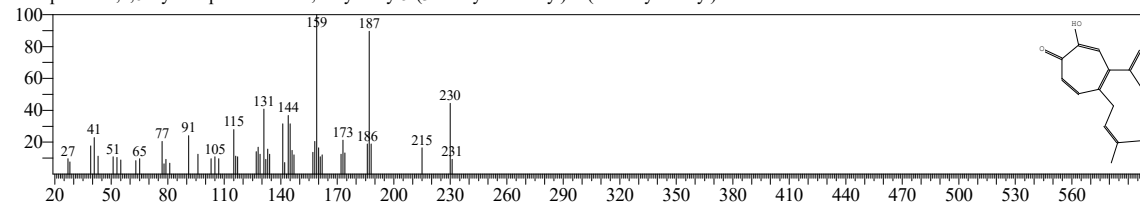

Hit#:8 Entry:292813 Library:W11N17MAIN1.lib

SI:70 Formula:C15H18O2 CAS:0-00-0 MolWeight:230 RetIndex:1845

CompName:(4aR,5S)-3,4a,5-trimethyl-4,5,6,7-tetrahydrobenzo[f]benzofuran-2-one

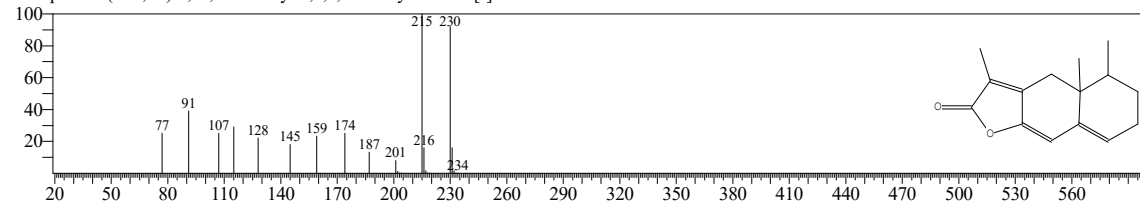

<< Target >>

Line#:61 R.Time:52.475(Scan#:9936) Retention Index:2033 MassPeaks:363

RawMode:Averaged 52.415-52.600(9924-9961) BasePeak:215.15(13275)

BG Mode:Calc. from Peak Group 1 - Event 1 Scan

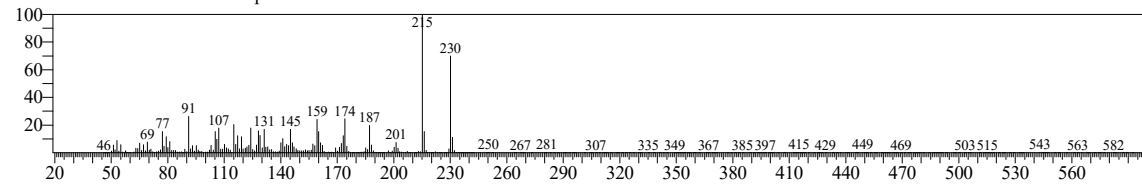

Hit#:9 Entry:531417 Library:W11N17MAIN1.lib

SI:69 Formula:C20H26O2 CAS:68-23-5 MolWeight:298 RetIndex:2214

CompName:Norethynodrel

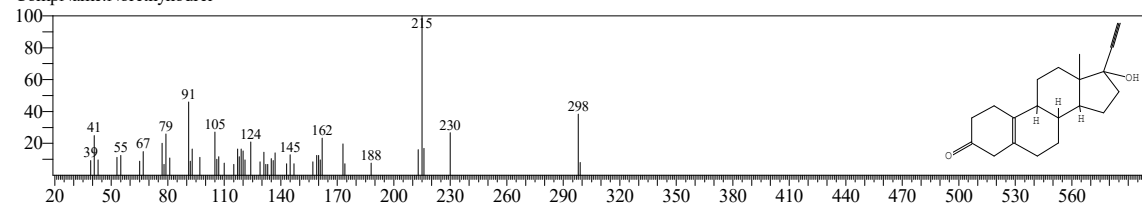

Hit#:10 Entry:174938 Library:NIST17.lib

SI:69 Formula:C20H26O2 CAS:68-23-5 MolWeight:298 RetIndex:2214

CompName:Norethynodrel

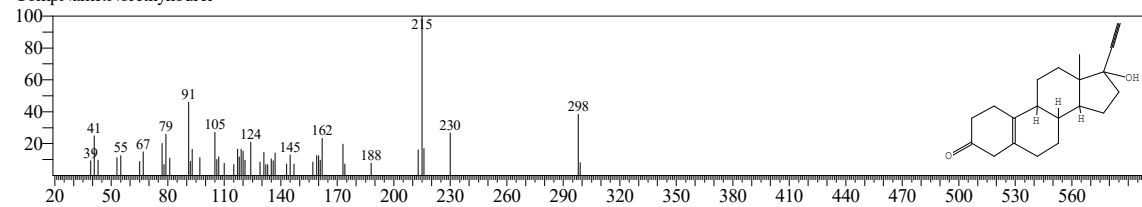

<< Target >>

Line#:62 R.Time:52.645(Scan#:9970) Retention Index:2039 MassPeaks:333

RawMode:Averaged 52.600-52.740(9961-9989) BasePeak:145.10(725)

BG Mode:Calc. from Peak Group 1 - Event 1 Scan

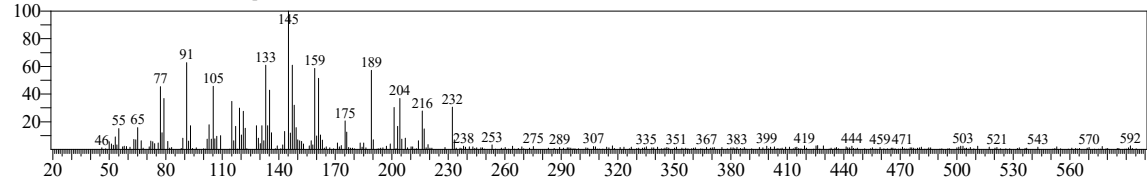

Hit#:1 Entry:104214 Library:NIST17.lib

SI:74 Formula:C15H20O2 CAS:37841-91-1 MolWeight:232 RetIndex:1734

CompName:Cycloprop[e]indene-1a,2(1H)-dicarboxaldehyde, 3a,4,5,6,6a,6b-hexahydro-5,5,6b-trimethyl-, (1a.alpha.,3a.beta.,6a.beta.,6b.alpha.)-(+)-

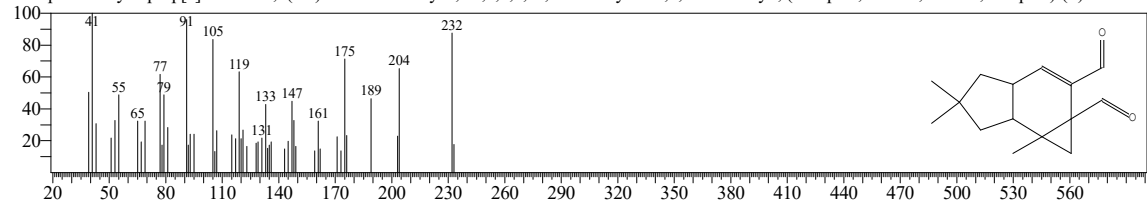

Hit#:2 Entry:299172 Library:W11N17MAIN1.lib

SI:74 Formula:C15H20O2 CAS:37841-91-1 MolWeight:232 RetIndex:1734

CompName:Cycloprop[e]indene-1a,2(1H)-dicarboxaldehyde, 3a,4,5,6,6a,6b-hexahydro-5,5,6b-trimethyl-, (1a.alpha.,3a.beta.,6a.beta.,6b.alpha.)-(+)-

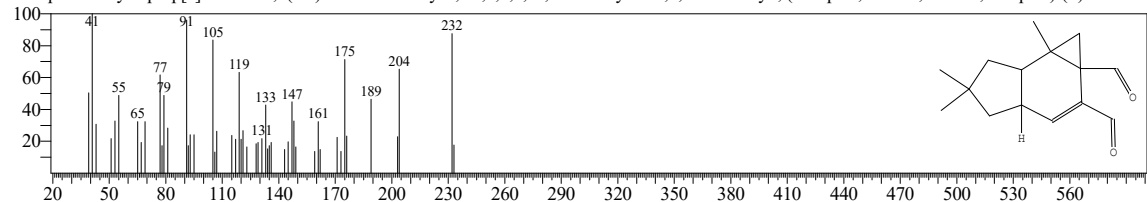

Hit#:3 Entry:299175 Library:W11N17MAIN1.lib

SI:74 Formula:C15H20O2 CAS:37841-91-1 MolWeight:232 RetIndex:1734

CompName:Cycloprop[e]indene-1a,2(1H)-dicarboxaldehyde, 3a,4,5,6,6a,6b-hexahydro-5,5,6b-trimethyl-, (1a.alpha.,3a.beta.,6a.beta.,6b.alpha.)-(+)-

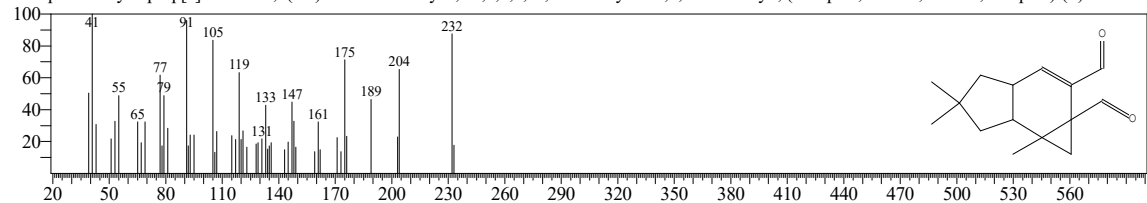

Hit#:4 Entry:203731 Library:W11N17MAIN1.lib

SI:73 Formula:C14H20O CAS:124957-09-1 MolWeight:204 RetIndex:1563

CompName:2,5,5,8a-Tetramethyl-6,7,8,8a-tetrahydro-5H-naphthalen-1-one

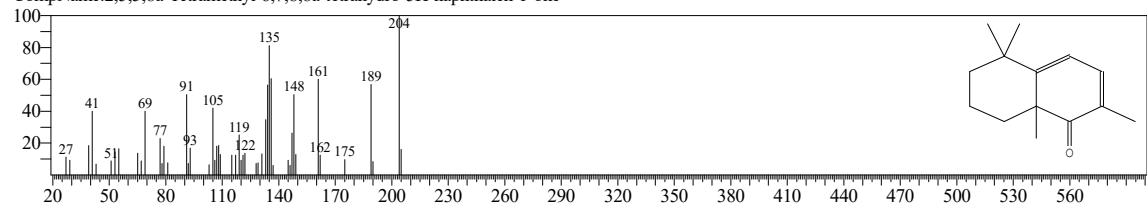



<< Target >>

Line#:62 R.Time:52.645(Scan#:9970) Retention Index:2039 MassPeaks:333

RawMode:Averaged 52.600-52.740(9961-9989) BasePeak:145.10(725)

BG Mode:Calc. from Peak Group 1 - Event 1 Base

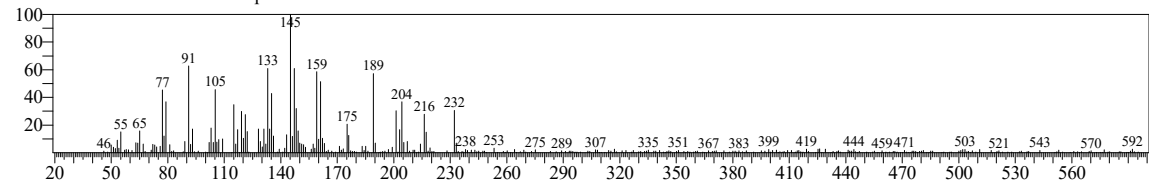

Hit#:5 Entry:74954 Library:NIST17.lib

SI:73 Formula:C14H20O CAS:124957-09-1 MolWeight:204 RetIndex:1563

CompName:2,5,5,8a-Tetramethyl-6,7,8,8a-tetrahydro-5H-naphthalen-1-one

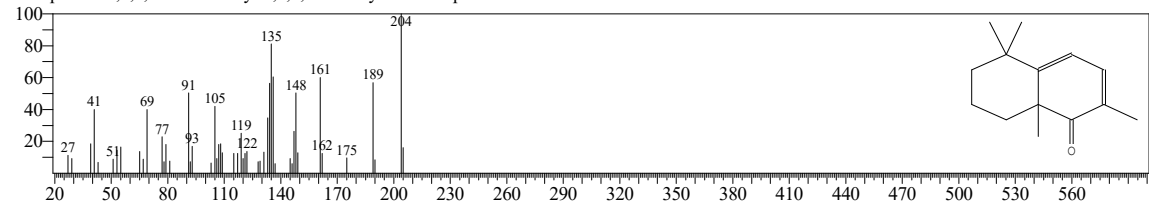

Hit#:6 Entry:75069 Library:NIST17.lib

SI:73 Formula:C15H24 CAS:351222-66-7 MolWeight:204 RetIndex:1487

CompName:Valerena-4,7(11)-diene

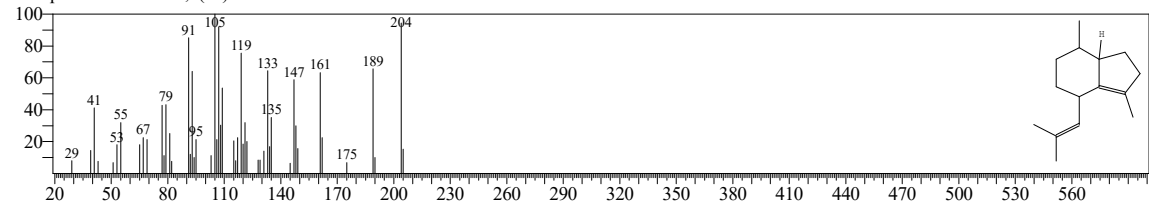

Hit#:7 Entry:204231 Library:W11N17MAIN1.lib

SI:73 Formula:C15H24 CAS:351222-66-7 MolWeight:204 RetIndex:1487

CompName:Valerena-4,7(11)-diene

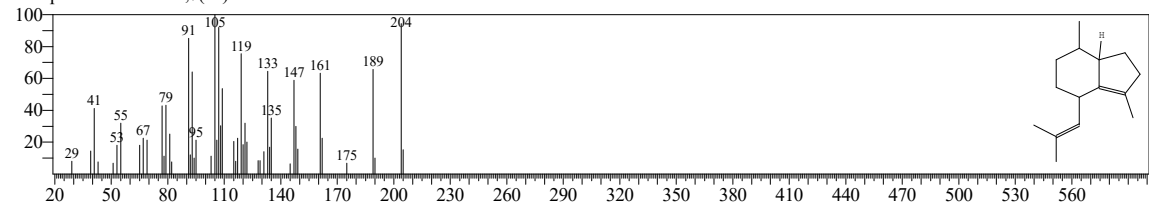

Hit#:8 Entry:89548 Library:NIST17.lib

SI:73 Formula:C15H22O CAS:4176-16-3 MolWeight:218 RetIndex:1675

CompName:(E)-3-((4S,7R,7aR)-3,7-Dimethyl-2,4,5,6,7,7a-hexahydro-1H-inden-4-yl)-2-methylacrylaldehyde

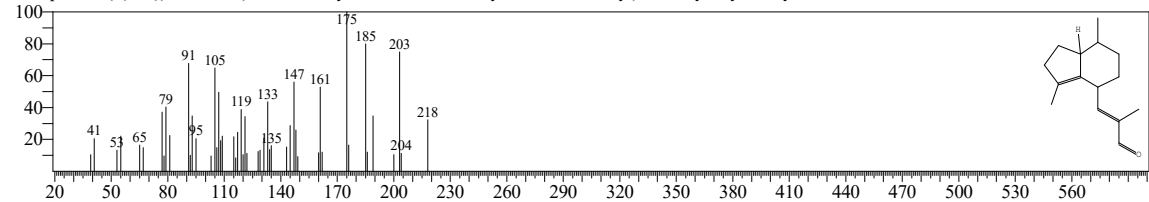

<< Target >>

Line#:62 R.Time:52.645(Scan#:9970) Retention Index:2039 MassPeaks:333

RawMode:Averaged 52.600-52.740(9961-9989) BasePeak:145.10(725)

BG Mode:Calc. from Peak Group 1 - Event 1 Scan

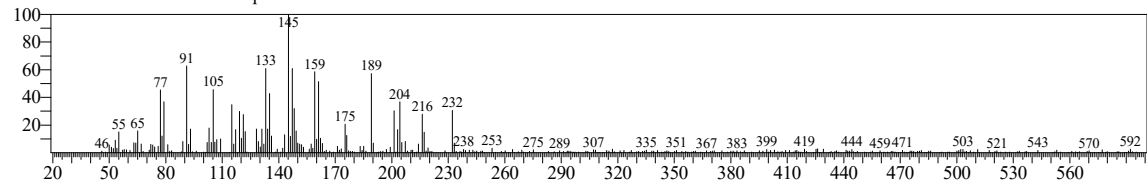

Hit#:9 Entry:250595 Library:W11N17MAIN1.lib

SI:73 Formula:C15H22O CAS:4176-16-3 MolWeight:218 RetIndex:1675

CompName:(E)-3-((4S,7R,7aR)-3,7-Dimethyl-2,4,5,6,7,7a-hexahydro-1H-inden-4-yl)-2-methylacrylaldehyde

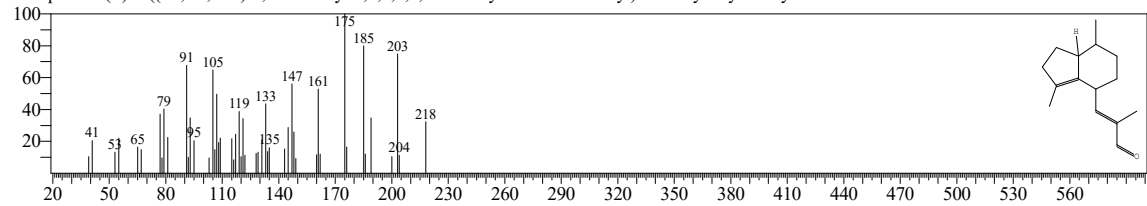

Hit#:10 Entry:75127 Library:NIST17.lib

SI:73 Formula:C15H24 CAS:138752-23-5 MolWeight:204 RetIndex:1403

CompName:7-epi-Silphiperfol-5-ene

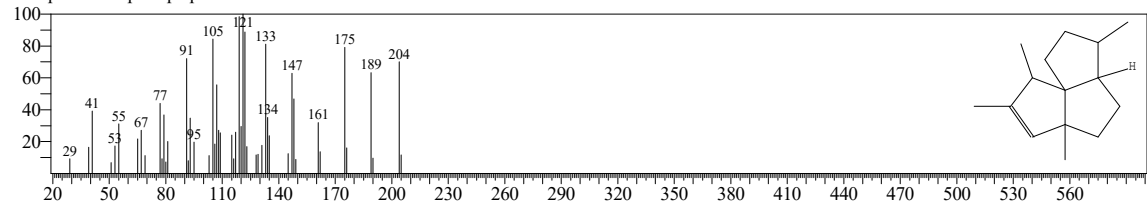

<< Target >>

Line#:63 R.Time:52.830(Scan#:10007) Retention Index:2045 MassPeaks:330

RawMode:Averaged 52.740-52.930(9989-10027) BasePeak:203.20(3014)

BG Mode:Calc. from Peak Group 1 - Event 1 Scan

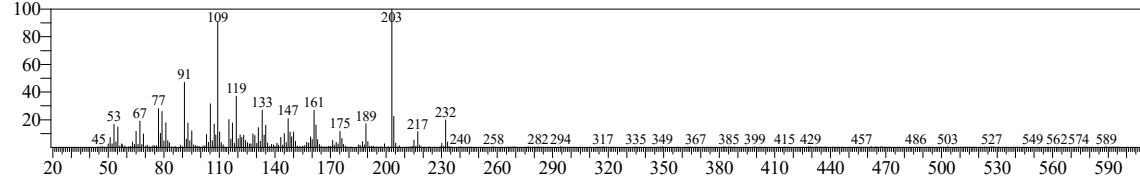

Hit#:1 Entry:250635 Library:W11N17MAIN1.lib

SI:81 Formula:C15H22O CAS:102681-49-2 MolWeight:218 RetIndex:1438

CompName:2H-Cyclopropa[g]benzofuran, 4,5,5a,6,6a,6b-hexahydro-4,4,6b-trimethyl-2-(1-methylethenyl)-

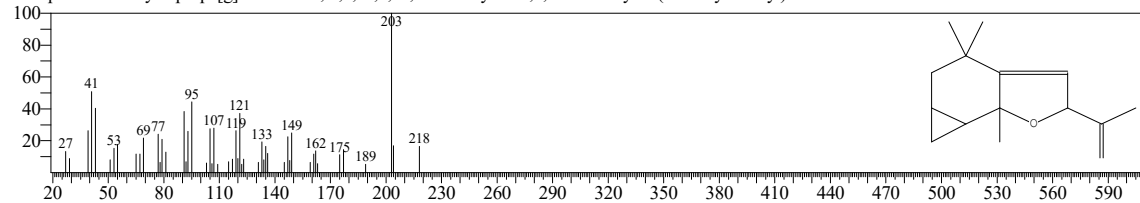

Hit#:2 Entry:250652 Library:W11N17MAIN1.lib

SI:79 Formula:C15H22O CAS:6831-17-0 MolWeight:218 RetIndex:1574

CompName:2H-Cyclopropa[a]naphthalen-2-one, 1,1a,4,5,6,7,7a,7b-octahydro-1,1,7,7a-tetramethyl-, (1a.alpha.,7.alpha.,7a.alpha.,7b.alpha.)-

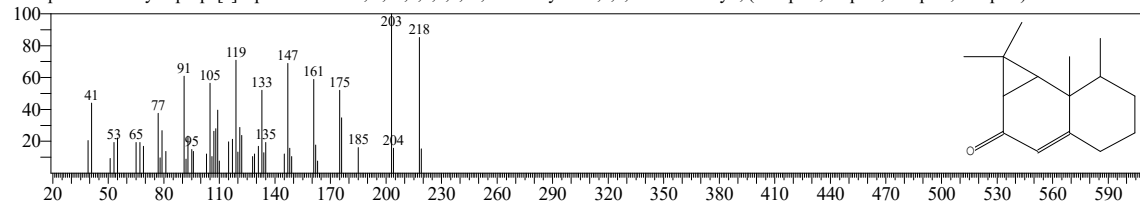

Hit#:3 Entry:89586 Library:NIST17.lib

SI:79 Formula:C15H22O CAS:6831-17-0 MolWeight:218 RetIndex:1574

CompName:2H-Cyclopropa[a]naphthalen-2-one, 1,1a,4,5,6,7,7a,7b-octahydro-1,1,7,7a-tetramethyl-, (1a.alpha.,7.alpha.,7a.alpha.,7b.alpha.)-

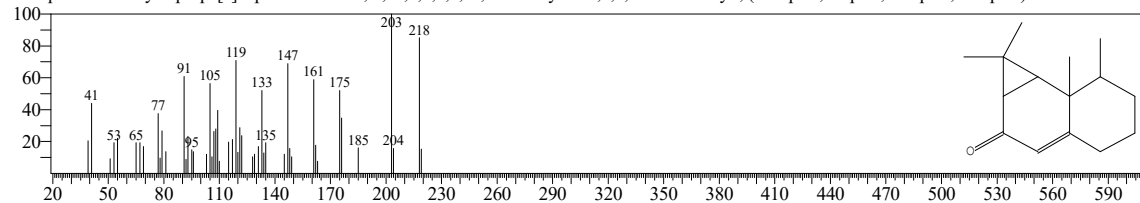

Hit#:4 Entry:250634 Library:W11N17MAIN1.lib

SI:79 Formula:C15H22O CAS:102681-49-2 MolWeight:218 RetIndex:1438

CompName:2H-Cyclopropa[g]benzofuran, 4,5,5a,6,6a,6b-hexahydro-4,4,6b-trimethyl-2-(1-methylethenyl)-

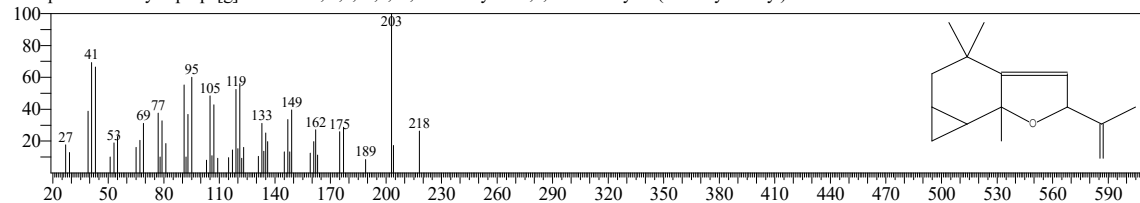

<< Target >>

Line#:63 R.Time:52.830(Scan#:10007) Retention Index:2045 MassPeaks:330

RawMode:Averaged 52.740-52.930(9989-10027) BasePeak:203.20(3014)

BG Mode:Calc. from Peak Group 1 - Event 1 Scan

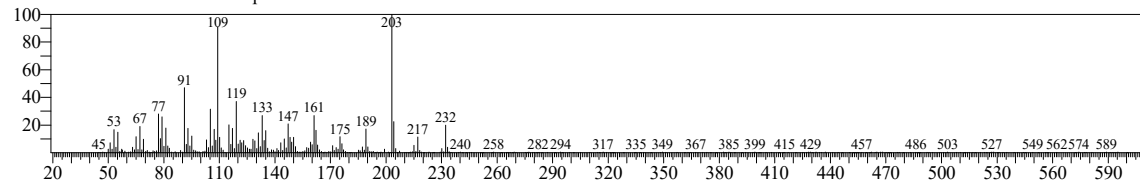

Hit#:5 Entry:89555 Library:NIST17.lib

SI:79 Formula:C15H22O CAS:102681-49-2 MolWeight:218 RetIndex:1438

CompName:2H-Cyclopropa[g]benzofuran, 4,5,5a,6,6a,6b-hexahydro-4,4,6b-trimethyl-2-(1-methylethenyl)-

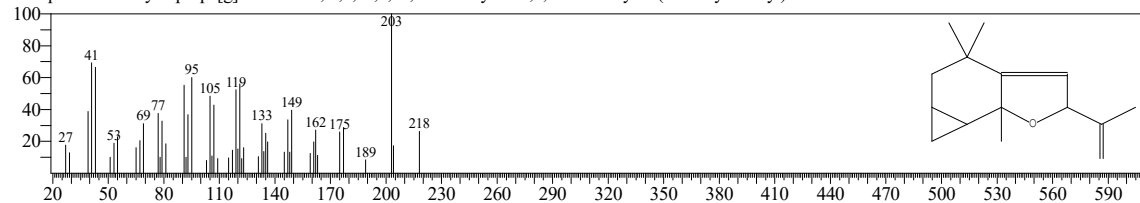

Hit#:6 Entry:89510 Library:NIST17.lib

SI:79 Formula:C15H22O CAS:34413-94-0 MolWeight:218 RetIndex:1590

CompName:Squamulose

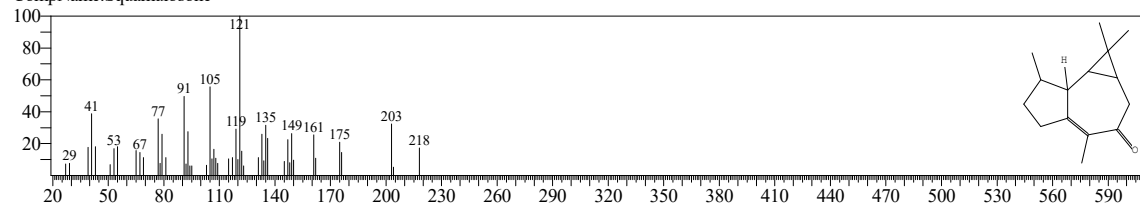

Hit#:7 Entry:250290 Library:W11N17MAIN1.lib

SI:79 Formula:C15H22O CAS:34413-94-0 MolWeight:218 RetIndex:1590

CompName:Squamulose

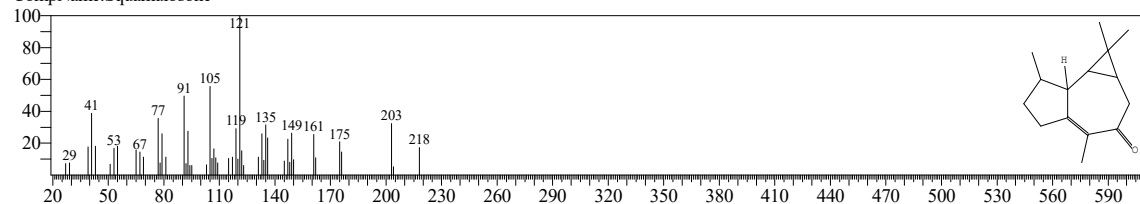

Hit#:8 Entry:203866 Library:W11N17MAIN1.lib

SI:76 Formula:C15H24 CAS:22567-17-5 MolWeight:204 RetIndex:1461

CompName:Azulene, 1,2,3,3a,4,5,6,7-octahydro-1,4-dimethyl-7-(1-methylethenyl)-, [1R-(1.alpha.,3a.beta.,4.alpha.,7.beta.)]-

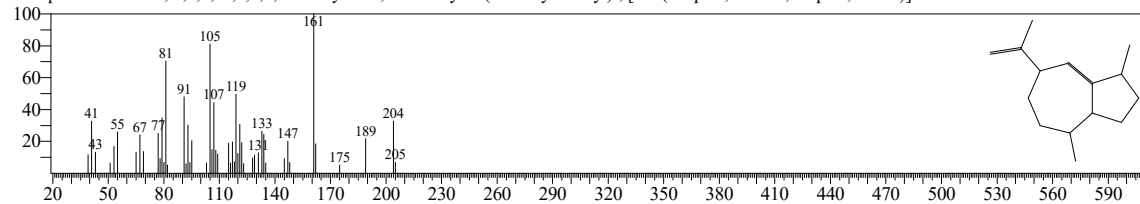

<< Target >>

Line#:63 R.Time:52.830(Scan#:10007) Retention Index:2045 MassPeaks:330

RawMode:Averaged 52.740-52.930(9989-10027) BasePeak:203.20(3014)

BG Mode:Calc. from Peak Group 1 - Event 1 Scan

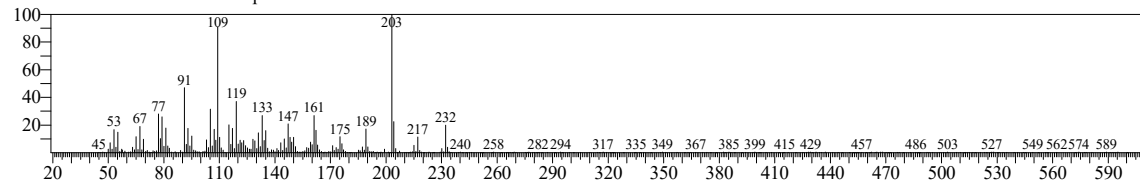

Hit#:9 Entry:250262 Library:W11N17MAIN1.lib

SI:76 Formula:C15H22O CAS:19598-45-9 MolWeight:218 RetIndex:1678

CompName:2(3H)-Naphthalenone, 4,4a,5,6,7,8-hexahydro-4a,5-dimethyl-3-(1-methylethylidene)-, (4a-cis)-

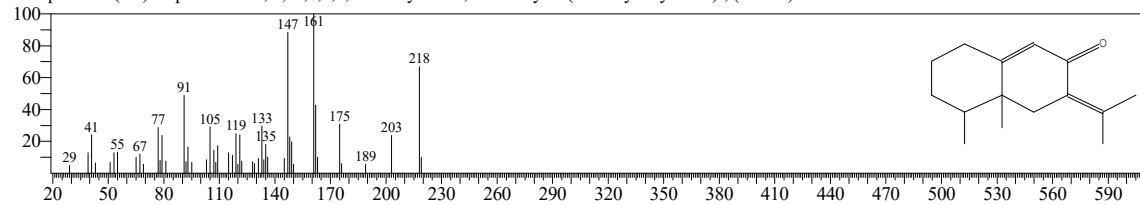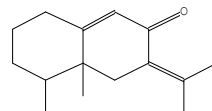

Hit#:10 Entry:89538 Library:NIST17.lib

SI:76 Formula:C15H22O CAS:19598-45-9 MolWeight:218 RetIndex:1678

CompName:2(3H)-Naphthalenone, 4,4a,5,6,7,8-hexahydro-4a,5-dimethyl-3-(1-methylethylidene)-, (4a-cis)-

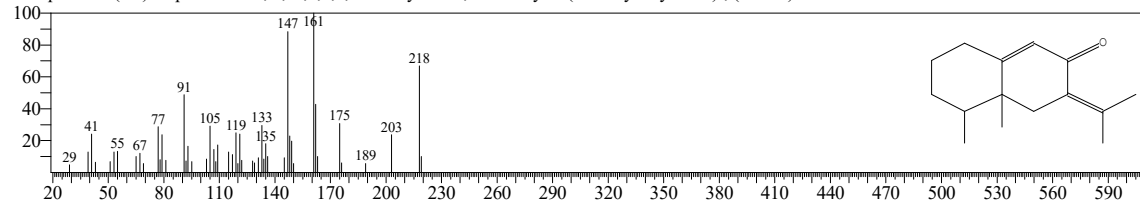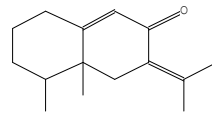

<< Target >>

Line#:64 R.Time:53.750(Scan#:10191) Retention Index:2075 MassPeaks:351

RawMode:Averaged 53.685-53.840(10178-10209) BasePeak:125.10(949)

BG Mode:Calc. from Peak Group 1 - Event 1 Scan

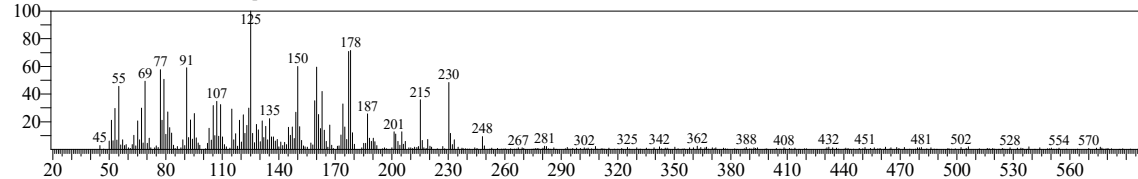

Hit#:1 Entry:36488 Library:W11N17MAIN2.lib

SI:70 Formula:C<sub>15</sub>H<sub>20</sub>O<sub>7</sub> CAS:23282-20-4 MolWeight:312 RetIndex:2573

CompName:Trichothec-9-en-8-one, 12,13-epoxy-3,4,7,15-tetrahydroxy-, (3.alpha.,4.beta.,7.alpha.)-

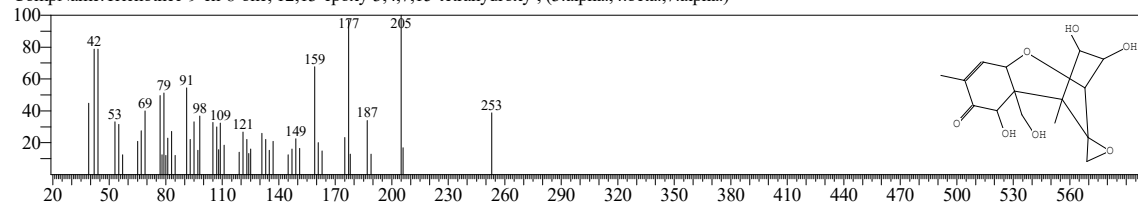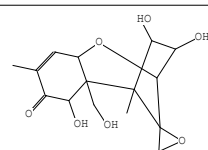

Hit#:2 Entry:36489 Library:W11N17MAIN2.lib

SI:70 Formula:C<sub>15</sub>H<sub>20</sub>O<sub>7</sub> CAS:23282-20-4 MolWeight:312 RetIndex:2573

CompName:Trichothec-9-en-8-one, 12,13-epoxy-3,4,7,15-tetrahydroxy-, (3.alpha.,4.beta.,7.alpha.)-

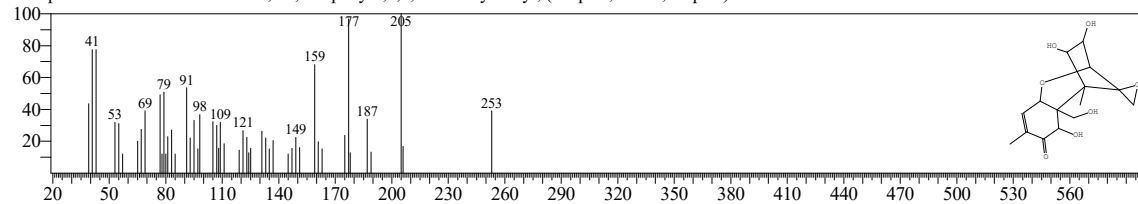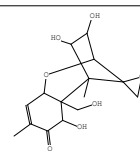

Hit#:3 Entry:189073 Library:NIST17.lib

SI:70 Formula:C<sub>15</sub>H<sub>20</sub>O<sub>7</sub> CAS:23282-20-4 MolWeight:312 RetIndex:2573

CompName:Trichothec-9-en-8-one, 12,13-epoxy-3,4,7,15-tetrahydroxy-, (3.alpha.,4.beta.,7.alpha.)-

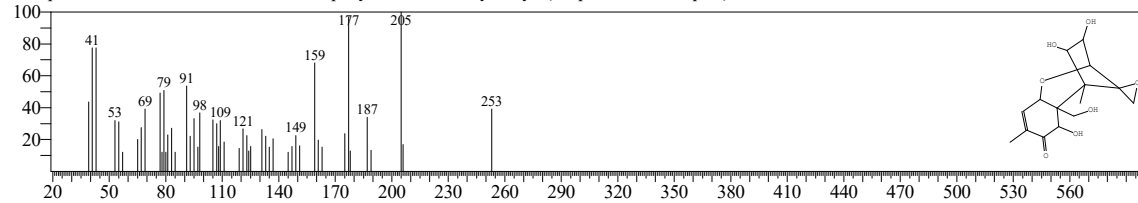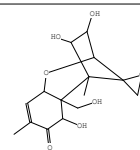

Hit#:4 Entry:120631 Library:NIST17.lib

SI:69 Formula:C<sub>15</sub>H<sub>20</sub>O<sub>3</sub> CAS:28254-53-7 MolWeight:248 RetIndex:1984

CompName:Reynosin

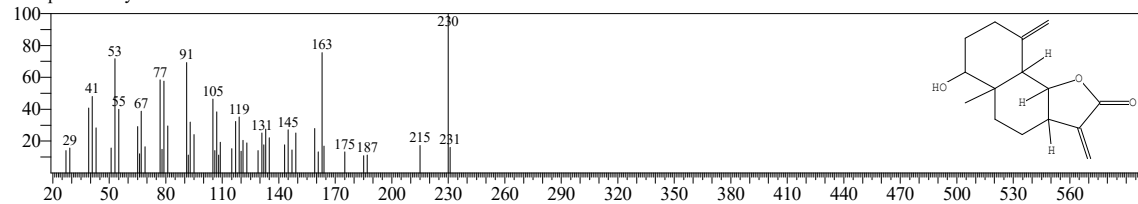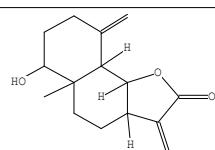

<< Target >>

Line#:64 R.Time:53.750(Scan#:10191) Retention Index:2075 MassPeaks:351

RawMode:Averaged 53.685-53.840(10178-10209) BasePeak:125.10(949)

BG Mode:Calc. from Peak Group 1 - Event 1 Scan

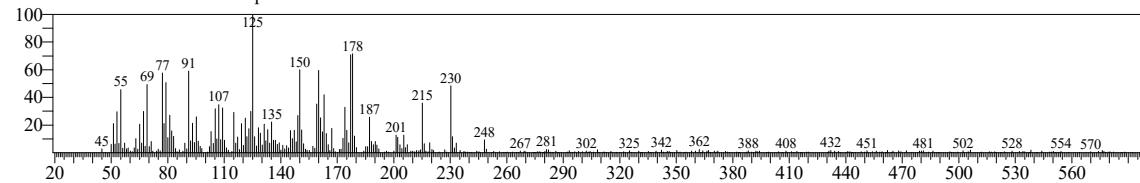

Hit#:5 Entry:354596 Library:W11N17MAIN1.lib

SI:69 Formula:C15H20O3 CAS:28254-53-7 MolWeight:248 RetIndex:1984

CompName:Reynosin

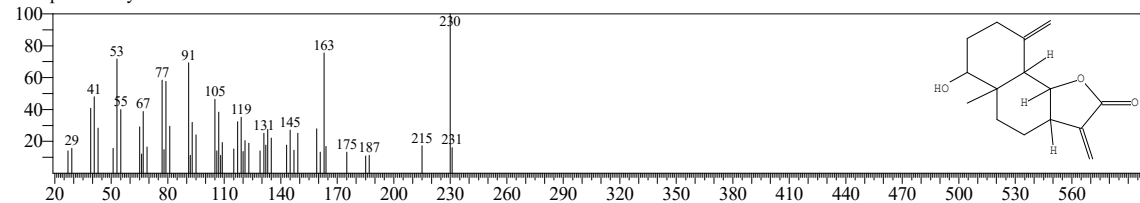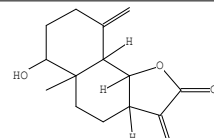

Hit#:6 Entry:418031 Library:W11N17MAIN1.lib

SI:66 Formula:C15H22O4 CAS:2198-92-7 MolWeight:266 RetIndex:2025

CompName:Verrucarol

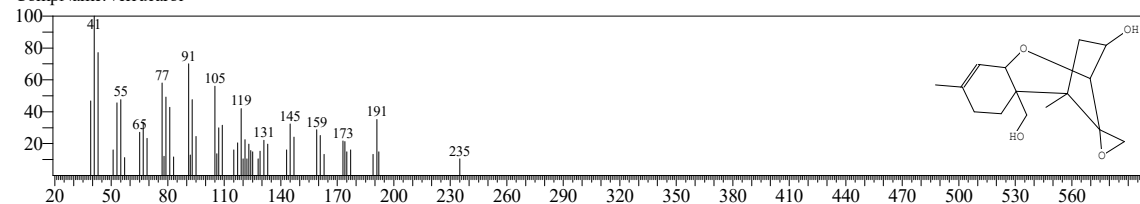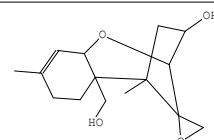

Hit#:7 Entry:418032 Library:W11N17MAIN1.lib

SI:66 Formula:C15H22O4 CAS:2198-92-7 MolWeight:266 RetIndex:2025

CompName:Verrucarol

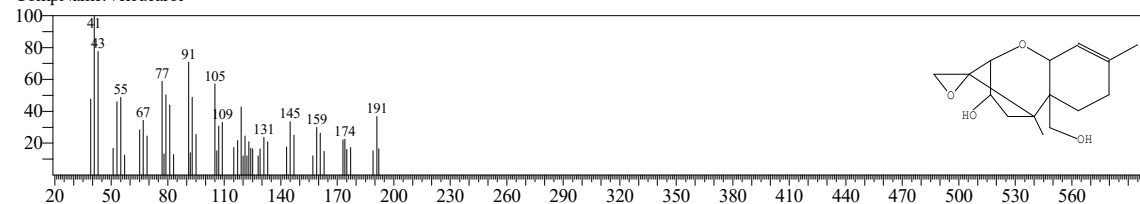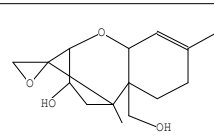

Hit#:8 Entry:139289 Library:NIST17.lib

SI:66 Formula:C15H22O4 CAS:2198-92-7 MolWeight:266 RetIndex:2025

CompName:Verrucarol

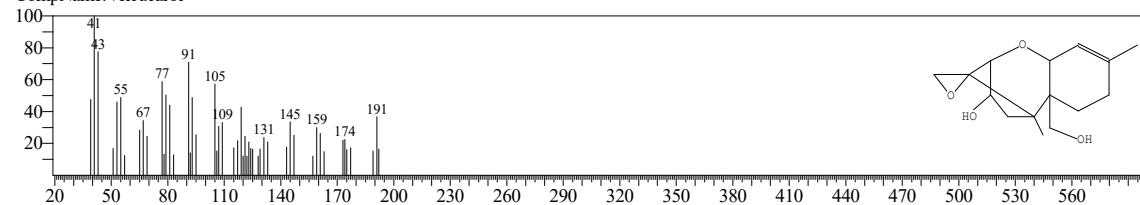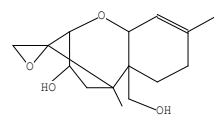

<< Target >>

Line#:64 R.Time:53.750(Scan#:10191) Retention Index:2075 MassPeaks:351

RawMode:Averaged 53.685-53.840(10178-10209) BasePeak:125.10(949)

BG Mode:Calc. from Peak Group 1 - Event 1 Scan

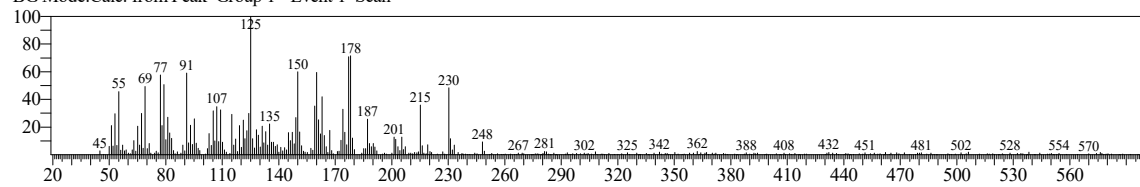

Hit#:9 Entry:258127 Library:W11N17MAIN1.lib

SI:66 Formula:C15H24O CAS:0-00-0 MolWeight:220 RetIndex:1293

CompName:Aristolene epoxide

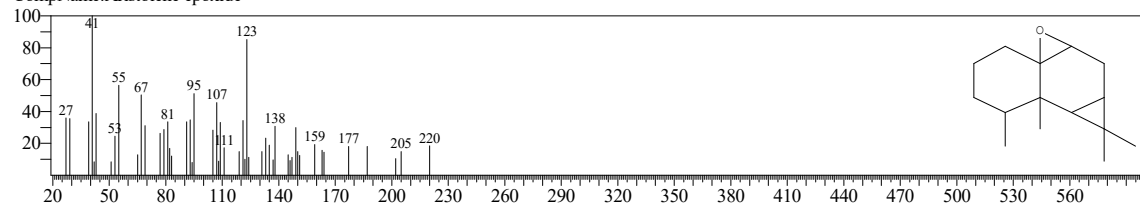

Hit#:10 Entry:257882 Library:W11N17MAIN1.lib

SI:66 Formula:C15H24O CAS:0-00-0 MolWeight:220 RetIndex:1293

CompName:1,4a,7,7-Tetramethyldecahydrocyclopropa[7,8]azuleno[3a,4-b]oxirene

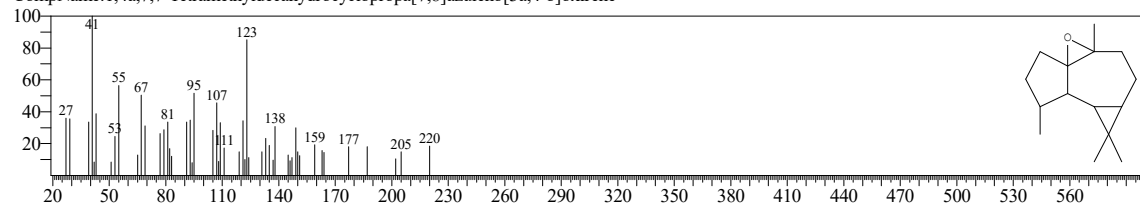



<< Target >>

Line#:65 R.Time:53.970(Scan#:10235) Retention Index:2082 MassPeaks:366

RawMode:Averaged 53.880-54.045(10217-10250) BasePeak:123.15(4074)

BG Mode:Calc. from Peak Group 1 - Event 1 Scan

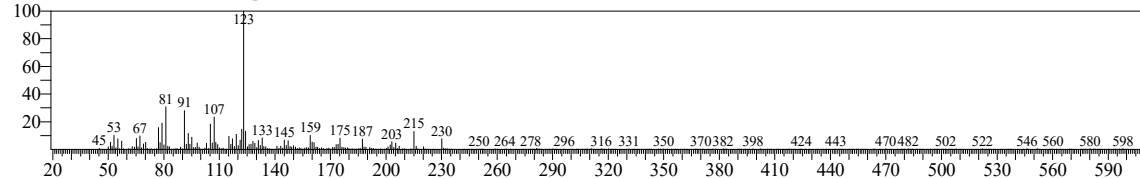

Hit#:1 Entry:90194 Library:W11N17MAIN2.lib

SI:79 Formula:C21H28O3 CAS:121-21-1 MolWeight:328 RetIndex:2335

CompName:Cyclopropanecarboxylic acid, 2,2-dimethyl-3-(2-methyl-1-propenyl)-, 2-methyl-4-oxo-3-(2,4-pentadienyl)-2-cyclopenten-1-yl ester, [1R-[1.alpha.

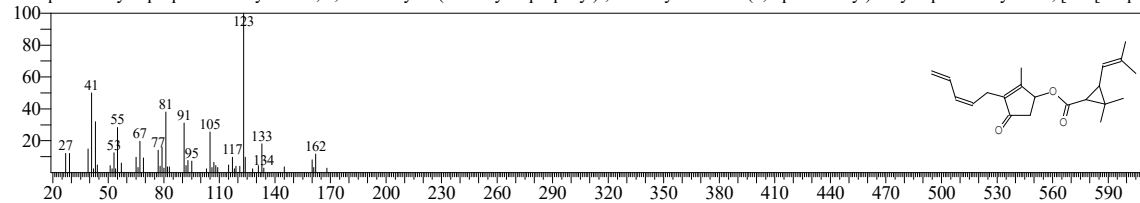

Hit#:2 Entry:207196 Library:NIST17.lib

SI:79 Formula:C21H28O3 CAS:121-21-1 MolWeight:328 RetIndex:2335

CompName:Cyclopropanecarboxylic acid, 2,2-dimethyl-3-(2-methyl-1-propenyl)-, 2-methyl-4-oxo-3-(2,4-pentadienyl)-2-cyclopenten-1-yl ester, [1R-[1.alpha.

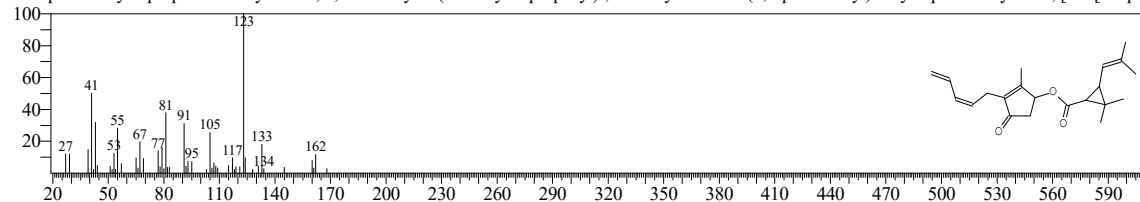

Hit#:3 Entry:150 Library:PESTEI\_3.lib

SI:77 Formula:C21H28O3 CAS:121-21-1 MolWeight:328 RetIndex:2341

CompName:Pyrethrin I

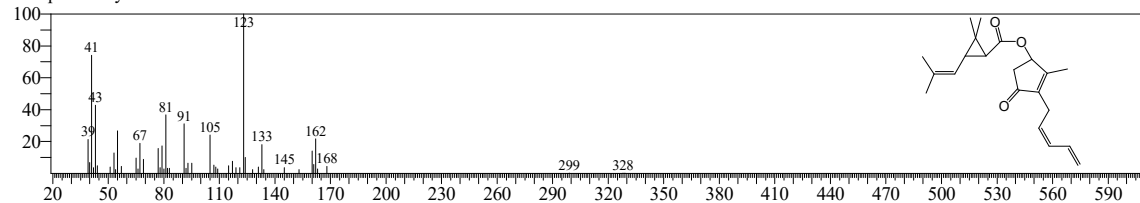

Hit#:4 Entry:204716 Library:W11N17MAIN1.lib

SI:76 Formula:C15H24 CAS:52617-34-2 MolWeight:204 RetIndex:1184

CompName:(1S,1aS,1bR,4S,5S,5aS,6aR)-1a,1b,4,5a-Tetramethyldecahydro-1,5-methanocyclopropa[a]jindene

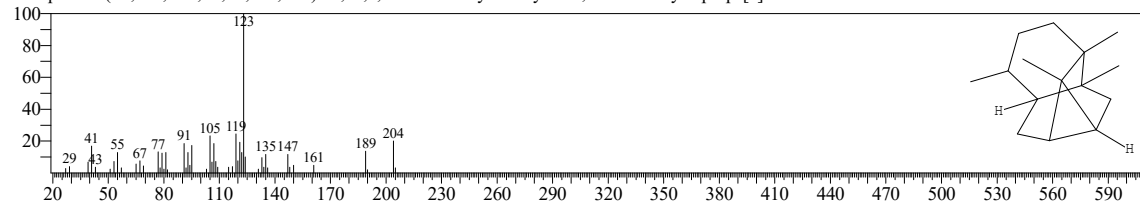

<< Target >>

Line#:65 R.Time:53.970(Scan#:10235) Retention Index:2082 MassPeaks:366

RawMode:Averaged 53.880-54.045(10217-10250) BasePeak:123.15(4074)

BG Mode:Calc. from Peak Group 1 - Event 1 Scan

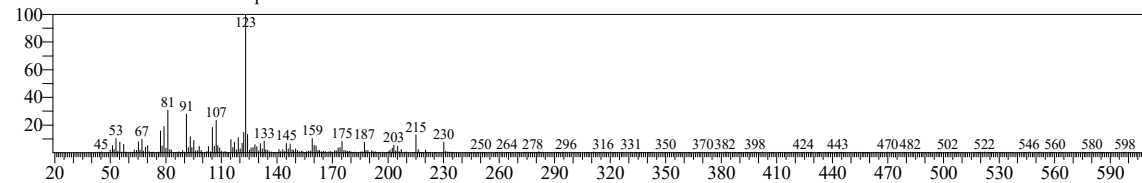

Hit#:5 Entry:75134 Library:NIST17.lib

SI:76 Formula:C15H24 CAS:52617-34-2 MolWeight:204 RetIndex:1184

CompName:(1S,1aS,1bR,4S,5S,5aS,6aR)-1a,1b,4,5a-Tetramethyldecahydro-1,5-methanocyclopropa[a]indene

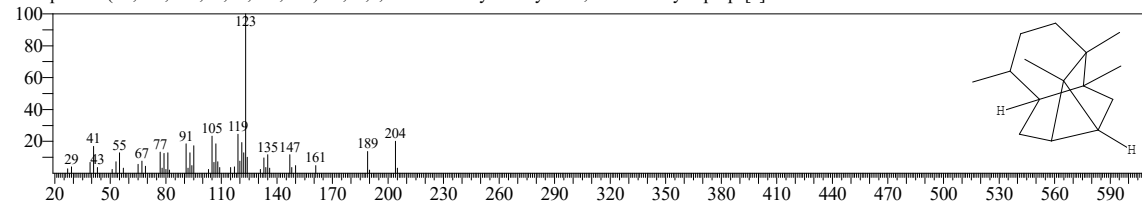

Hit#:6 Entry:102431 Library:NIST17.lib

SI:75 Formula:C16H22O CAS:10232-02-7 MolWeight:230 RetIndex:1879

CompName:Phenol, 2-(3,7-dimethylocta-2,6-dienyl)-

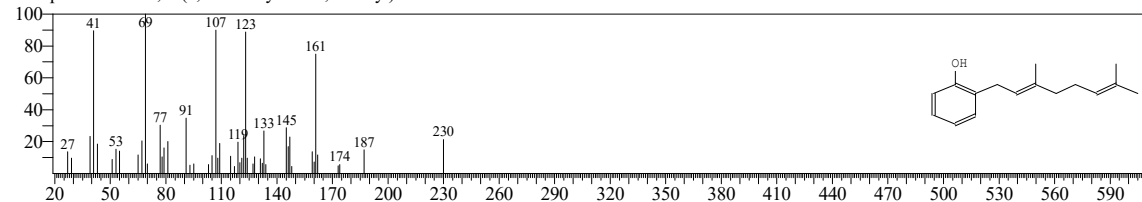

Hit#:7 Entry:293016 Library:W11N17MAIN1.lib

SI:75 Formula:C16H22O CAS:10232-02-7 MolWeight:230 RetIndex:1879

CompName:Phenol, 2-(3,7-dimethylocta-2,6-dienyl)-

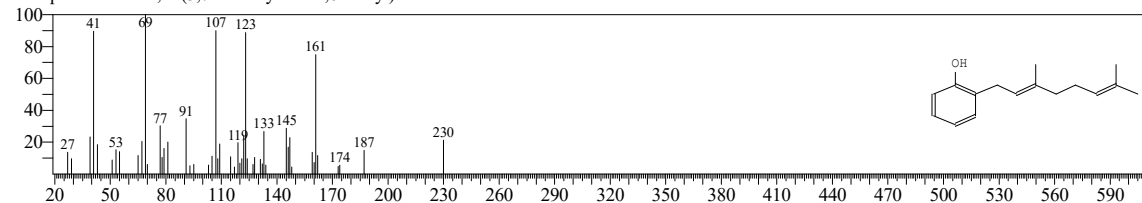

Hit#:8 Entry:292796 Library:W11N17MAIN1.lib

SI:74 Formula:C15H18O2 CAS:24268-42-6 MolWeight:230 RetIndex:1875

CompName:Isofuranodienone

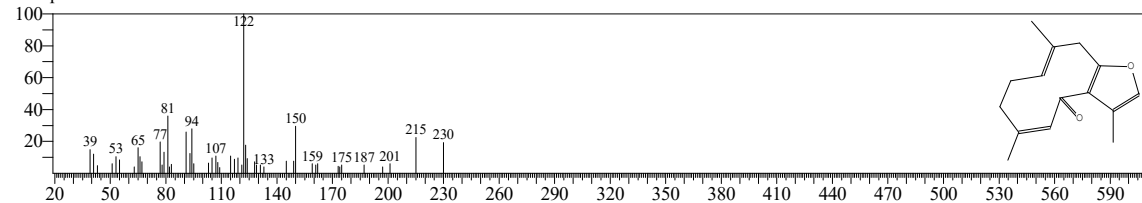

<< Target >>

Line#:65 R.Time:53.970(Scan#:10235) Retention Index:2082 MassPeaks:366

RawMode:Averaged 53.880-54.045(10217-10250) BasePeak:123.15(4074)

BG Mode:Calc. from Peak Group 1 - Event 1 Scan

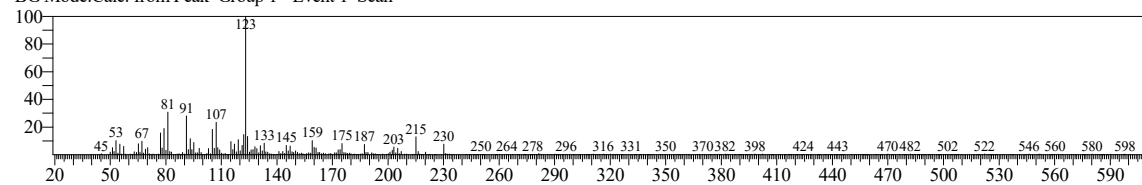

Hit#:9 Entry:102374 Library:NIST17.lib

SI:74 Formula:C15H18O2 CAS:24268-42-6 MolWeight:230 RetIndex:1875

CompName:Isofuranodienone

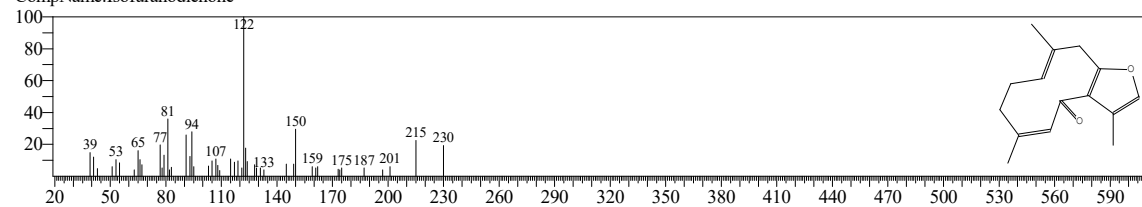

Hit#:10 Entry:292672 Library:W11N17MAIN1.lib

SI:74 Formula:C15H18O2 CAS:151590-41-9 MolWeight:230 RetIndex:1808

CompName:(R)-3,5,8a-Trimethyl-7,8,8a,9-tetrahydronaphtho[2,3-b]furan-4(6H)-one

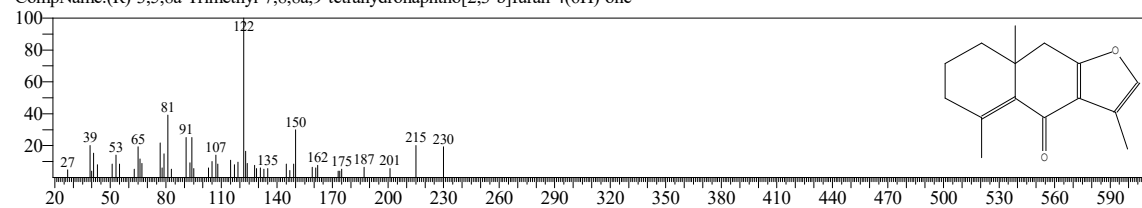

<< Target >>

Line#:66 R.Time:54.095(Scan#:10260) Retention Index:2086 MassPeaks:369

RawMode:Averaged 54.045-54.195(10250-10280) BasePeak:215.15(709)

BG Mode:Calc. from Peak Group 1 - Event 1 Scan

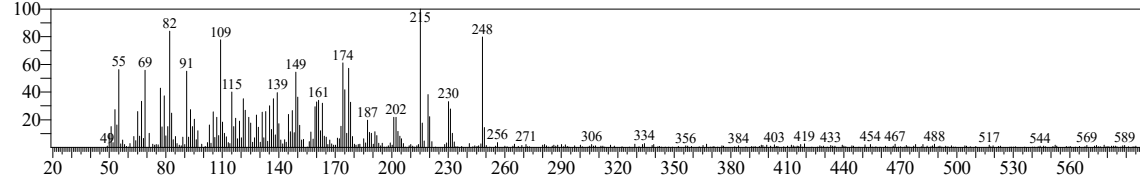

Hit#:1 Entry:305633 Library:W11N17MAIN1.lib

SI:63 Formula:C15H22O2 CAS:77646-19-6 MolWeight:234 RetIndex:1763

CompName:5H-Cyclopropa[a]naphthalen-5-one, 1,1a,2,3,6,7,7a,7b-octahydro-3-hydroxy-1,1,7,7a-tetramethyl-

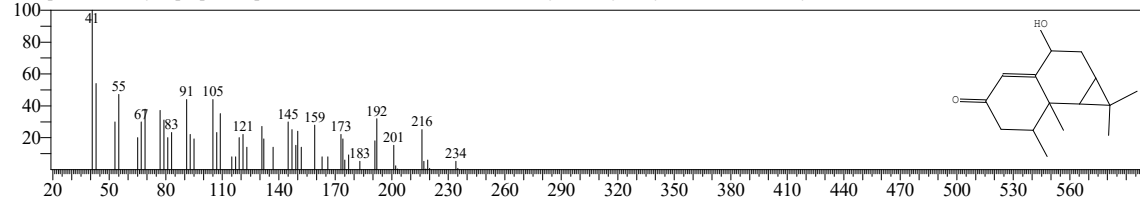

Hit#:2 Entry:354556 Library:W11N17MAIN1.lib

SI:62 Formula:C15H20O3 CAS:19908-69-1 MolWeight:248 RetIndex:1961

CompName:Azuleno[6,5-b]furan-2,5-dione, decahydro-4a,8-dimethyl-3-methylene-, [3aR-(3a.alpha.,4a.beta.,7a.alpha.,8.beta.,9a.alpha.)]-

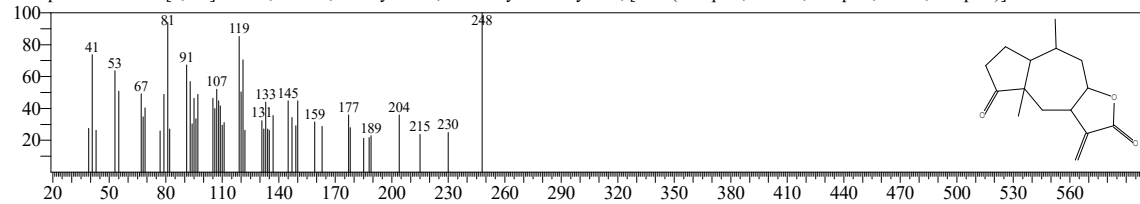

Hit#:3 Entry:354555 Library:W11N17MAIN1.lib

SI:62 Formula:C15H20O3 CAS:19908-69-1 MolWeight:248 RetIndex:1961

CompName:Azuleno[6,5-b]furan-2,5-dione, decahydro-4a,8-dimethyl-3-methylene-, [3aR-(3a.alpha.,4a.beta.,7a.alpha.,8.beta.,9a.alpha.)]-

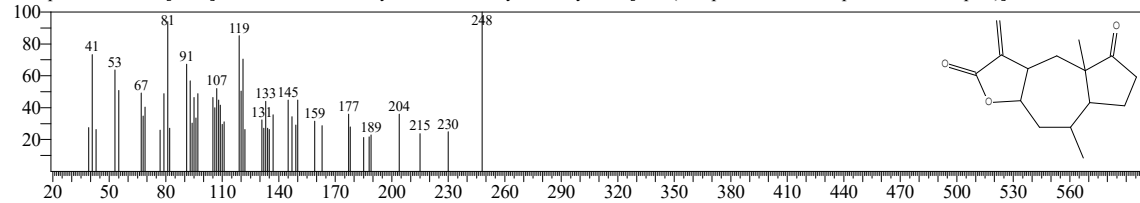

Hit#:4 Entry:120634 Library:NIST17.lib

SI:62 Formula:C15H20O3 CAS:19908-69-1 MolWeight:248 RetIndex:1961

CompName:Azuleno[6,5-b]furan-2,5-dione, decahydro-4a,8-dimethyl-3-methylene-, [3aR-(3a.alpha.,4a.beta.,7a.alpha.,8.beta.,9a.alpha.)]-

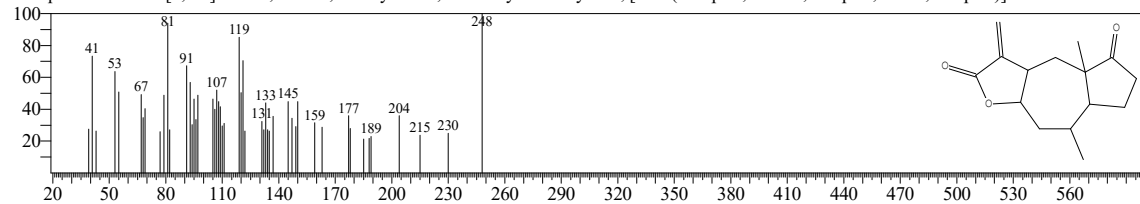

<< Target >>

Line#:66 R.Time:54.095(Scan#:10260) Retention Index:2086 MassPeaks:369

RawMode:Averaged 54.045-54.195(10250-10280) BasePeak:215.15(709)

BG Mode:Calc. from Peak Group 1 - Event 1 Scan

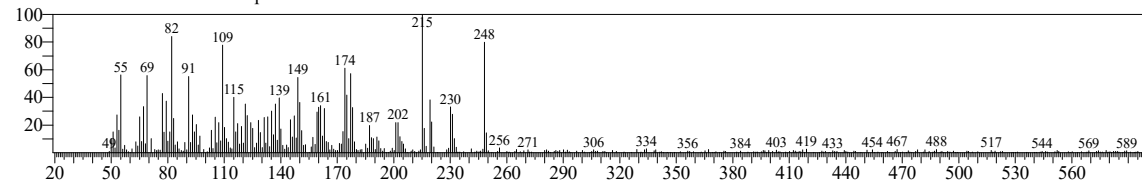

Hit#:5 Entry:305971 Library:W11N17MAIN1.lib

SI:62 Formula:C15H22O2 CAS:930090-10-1 MolWeight:234 RetIndex:1738

CompName:4-(3,3-Dimethyl-but-1-ynyl)-4-hydroxy-2,6,6-trimethylcyclohex-2-enone

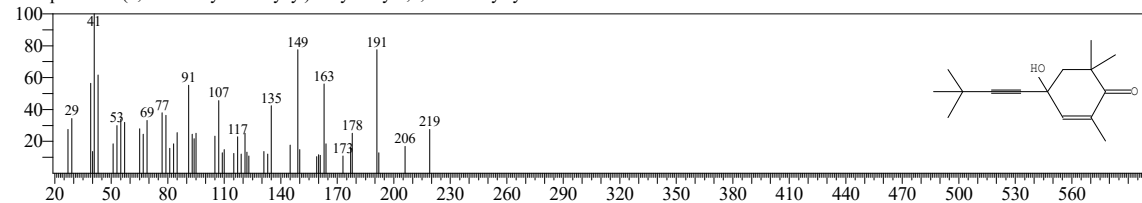

Hit#:6 Entry:106102 Library:NIST17.lib

SI:62 Formula:C15H22O2 CAS:930090-10-1 MolWeight:234 RetIndex:1738

CompName:4-(3,3-Dimethyl-but-1-ynyl)-4-hydroxy-2,6,6-trimethylcyclohex-2-enone

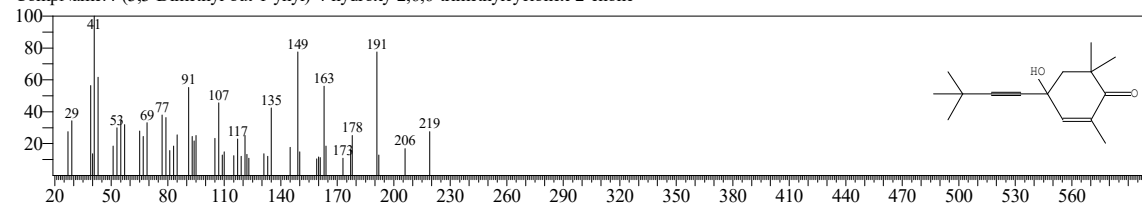

Hit#:7 Entry:106099 Library:NIST17.lib

SI:62 Formula:C15H22O2 CAS:77646-19-6 MolWeight:234 RetIndex:1763

CompName:5H-Cyclopropa[a]naphthalen-5-one, 1,1a,2,3,6,7,7a,7b-octahydro-3-hydroxy-1,1,7,7a-tetramethyl-

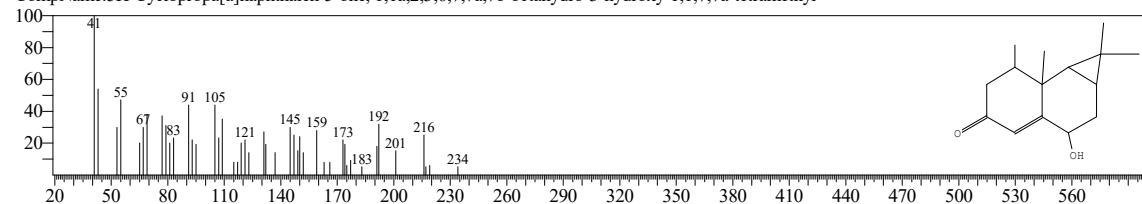

Hit#:8 Entry:305634 Library:W11N17MAIN1.lib

SI:62 Formula:C15H22O2 CAS:77646-19-6 MolWeight:234 RetIndex:1763

CompName:5H-Cyclopropa[a]naphthalen-5-one, 1,1a,2,3,6,7,7a,7b-octahydro-3-hydroxy-1,1,7,7a-tetramethyl-

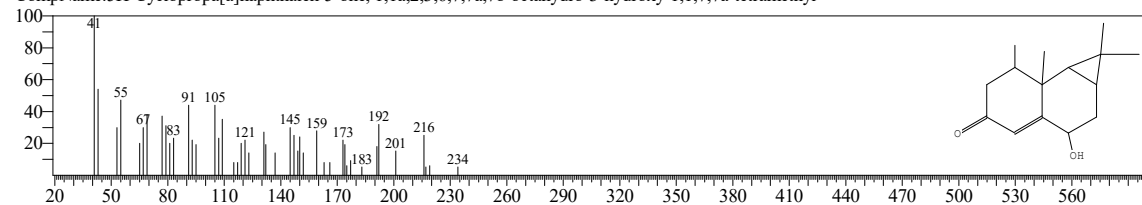

<< Target >>

Line#:66 R.Time:54.095(Scan#:10260) Retention Index:2086 MassPeaks:369

RawMode:Averaged 54.045-54.195(10250-10280) BasePeak:215.15(709)

BG Mode:Calc. from Peak Group 1 - Event 1 Scan

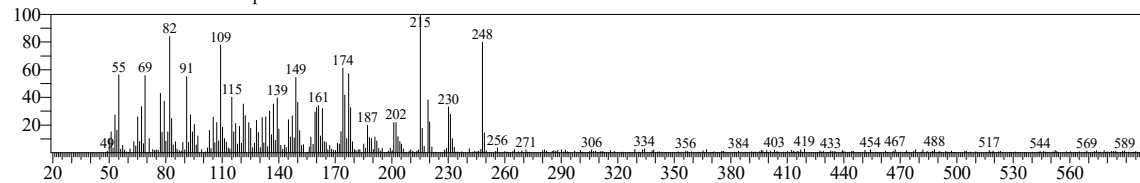

Hit#:9 Entry:258065 Library:W11N17MAIN1.lib

SI:62 Formula:C15H24O CAS:0-00-0 MolWeight:220 RetIndex:1293

CompName:Calarene epoxide

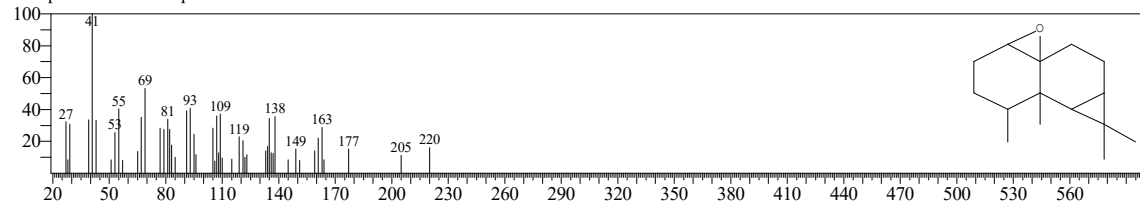

Hit#:10 Entry:258064 Library:W11N17MAIN1.lib

SI:62 Formula:C15H24O CAS:34717-35-6 MolWeight:220 RetIndex:1293

CompName:1,7,7b-Tetramethyldecahydrocyclopropa[5,6]naphtho[1,8a-b]oxirene

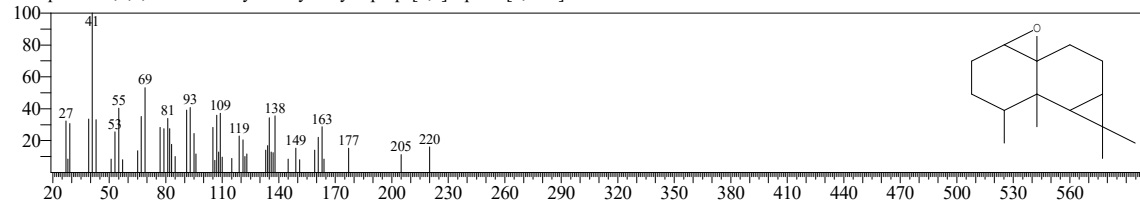

<< Target >>

Line#:67 R.Time:58.160(Scan#:11073) Retention Index:2224 MassPeaks:329

RawMode:Averaged 58.065-58.290(11054-11099) BasePeak:125.10(25971)

BG Mode:Calc. from Peak Group 1 - Event 1 Scan

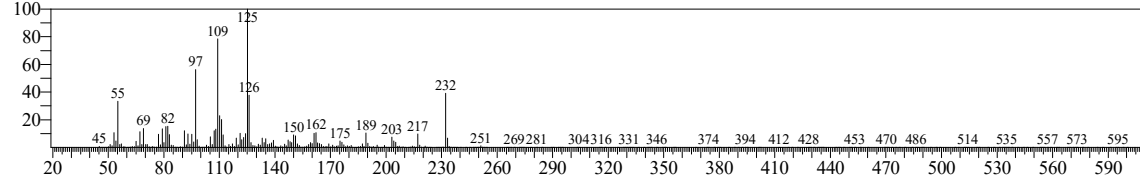

Hit#:1 Entry:278441 Library:W11N17MAIN1.lib

SI:70 Formula:C13H22O3 CAS:72777-88-9 MolWeight:226 RetIndex:1669

CompName:7-Oxabicyclo[4.1.0]heptan-3-ol, 6-(3-hydroxy-1-butenyl)-1,5,5-trimethyl-

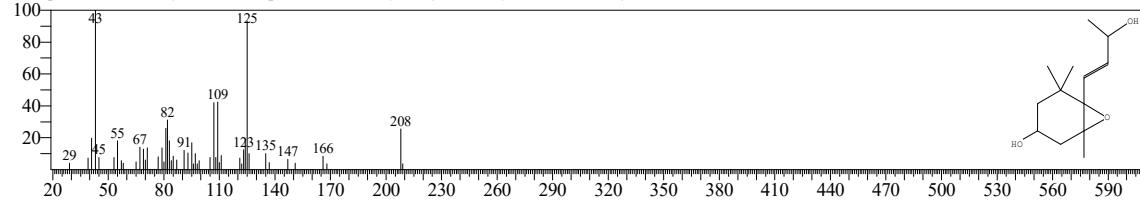

Hit#:2 Entry:97977 Library:NIST17.lib

SI:70 Formula:C13H22O3 CAS:72777-88-9 MolWeight:226 RetIndex:1669

CompName:7-Oxabicyclo[4.1.0]heptan-3-ol, 6-(3-hydroxy-1-butenyl)-1,5,5-trimethyl-

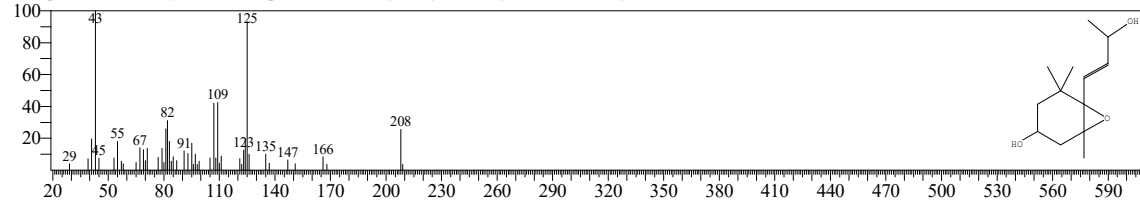

Hit#:3 Entry:217462 Library:W11N17MAIN1.lib

SI:70 Formula:C13H20O2 CAS:58682-39-6 MolWeight:208 RetIndex:1613

CompName:Bicyclo[4.2.2]dec-9-en-7-one, 1-hydroxy-2,2,6-trimethyl-, (+)-

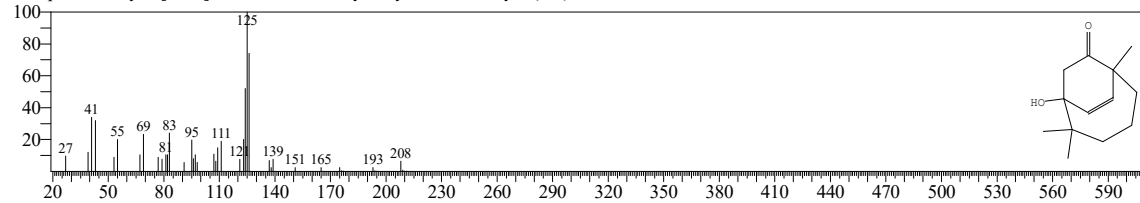

Hit#:4 Entry:93494 Library:NIST17.lib

SI:68 Formula:C13H18O3 CAS:80114-19-8 MolWeight:222 RetIndex:1465

CompName:3-Buten-2-one, 4-(2,5,5-trimethyl-3,8-dioxatricyclo[5.1.0.0(2,4)]oct-4-yl)-, [1.alpha.,2.alpha.,4.alpha.(E),7.alpha.]-

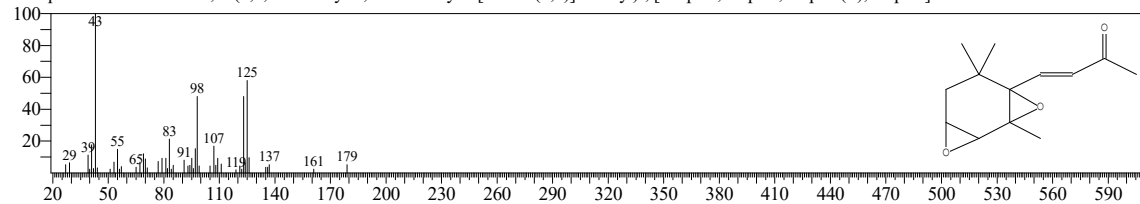

<< Target >>

Line#:67 R.Time:58.160(Scan#:11073) Retention Index:2224 MassPeaks:329

RawMode:Averaged 58.065-58.290(11054-11099) BasePeak:125.10(25971)

BG Mode:Calc. from Peak Group 1 - Event 1 Scan

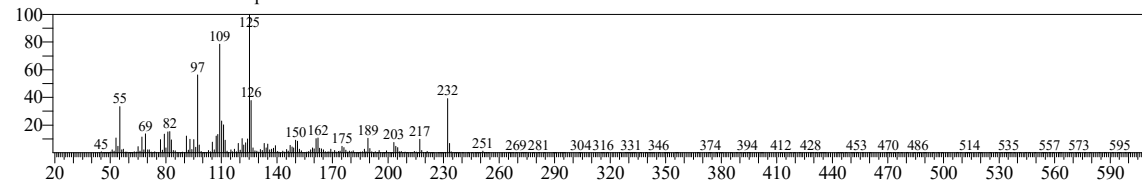

Hit#:5 Entry:264065 Library:W11N17MAIN1.lib

SI:68 Formula:C13H18O3 CAS:80114-19-8 MolWeight:222 RetIndex:1465

CompName:3-Buten-2-one, 4-(2,5,5-trimethyl-3,8-dioxatricyclo[5.1.0.0(2,4)]oct-4-yl)-, [1.alpha.,2.alpha.,4.alpha.(E),7.alpha.]-

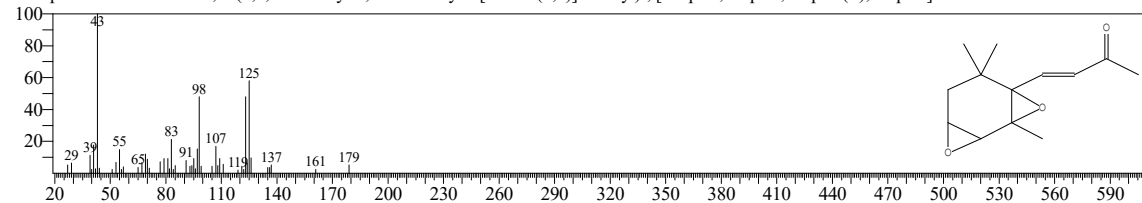

Hit#:6 Entry:265491 Library:W11N17MAIN1.lib

SI:68 Formula:C15H26O CAS:19078-37-6 MolWeight:222 RetIndex:1685

CompName:1-Naphthalenemethanol, 1,4,4a,5,6,7,8,8a-octahydro-2,5,5,8a-tetramethyl-

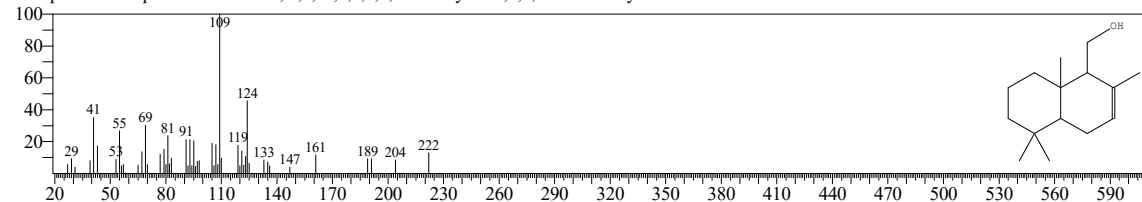

Hit#:7 Entry:94045 Library:NIST17.lib

SI:68 Formula:C15H26O CAS:19078-37-6 MolWeight:222 RetIndex:1685

CompName:1-Naphthalenemethanol, 1,4,4a,5,6,7,8,8a-octahydro-2,5,5,8a-tetramethyl-

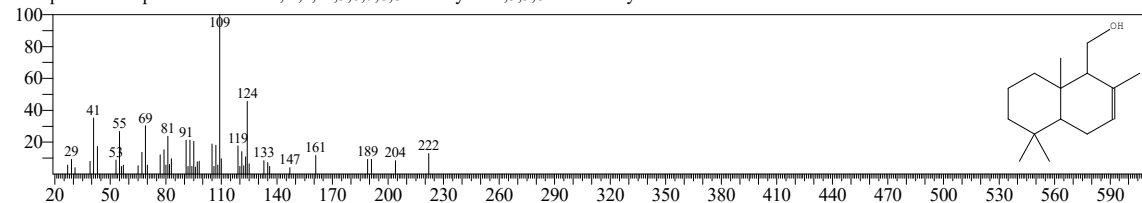

Hit#:8 Entry:265465 Library:W11N17MAIN1.lib

SI:68 Formula:C15H26O CAS:1803-39-0 MolWeight:222 RetIndex:1615

CompName:1(2H)-Naphthalenone, octahydro-4a,8a-dimethyl-7-(1-methylethyl)-, [4aR-(4a.alpha.,7.beta.,8a.alpha.)]-

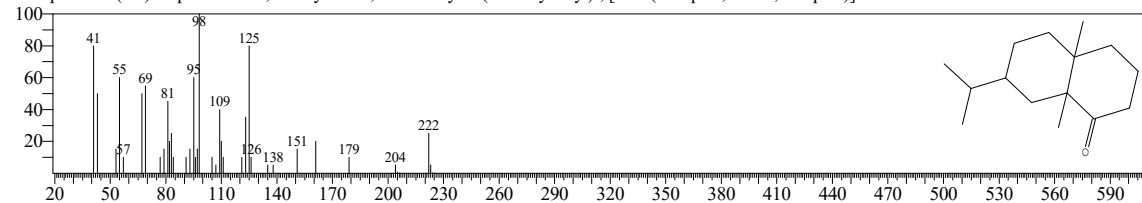



<< Target >>

Line#:67 R.Time:58.160(Scan#:11073) Retention Index:2224 MassPeaks:329

RawMode:Averaged 58.065-58.290(11054-11099) BasePeak:125.10(25971)

BG Mode:Calc. from Peak Group 1 - Event 1 Scan

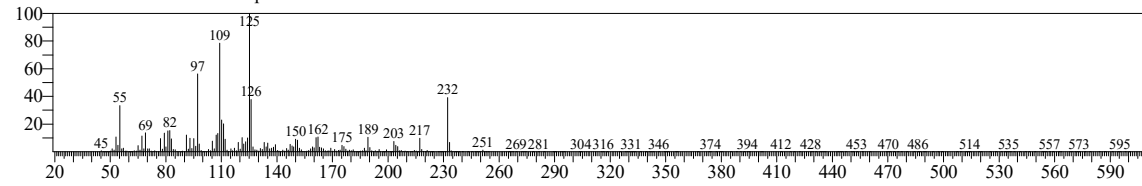

Hit#:9 Entry:264741 Library:W11N17MAIN1.lib

SI:68 Formula:C14H22O2 CAS:97371-44-3 MolWeight:222 RetIndex:1518

CompName:3-Buten-2-one, 3-methyl-4-(1,3,3-trimethyl-7-oxabicyclo[4.1.0]heptan-1-yl)-

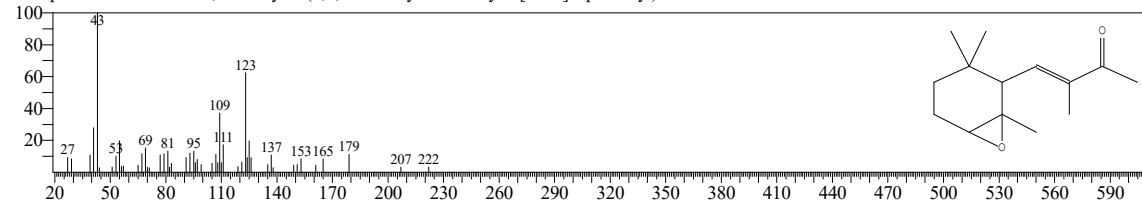

Hit#:10 Entry:93767 Library:NIST17.lib

SI:68 Formula:C14H22O2 CAS:97371-44-3 MolWeight:222 RetIndex:1518

CompName:3-Buten-2-one, 3-methyl-4-(1,3,3-trimethyl-7-oxabicyclo[4.1.0]heptan-1-yl)-

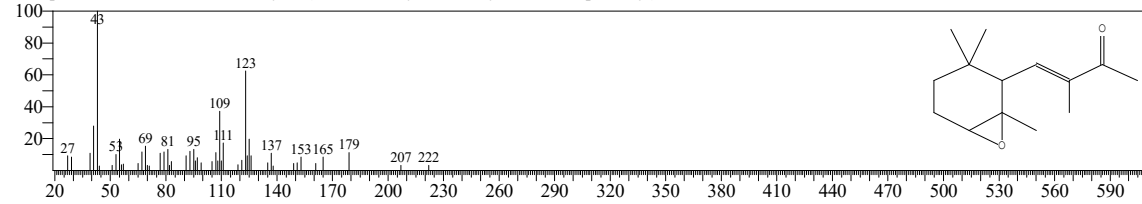

<< Target >>

Line#:68 R.Time:58.505(Scan#:11142) Retention Index:2236 MassPeaks:379

RawMode:Averaged 58.420-58.595(11125-11160) BasePeak:97.10(6507)

BG Mode:Calc. from Peak Group 1 - Event 1 Scan

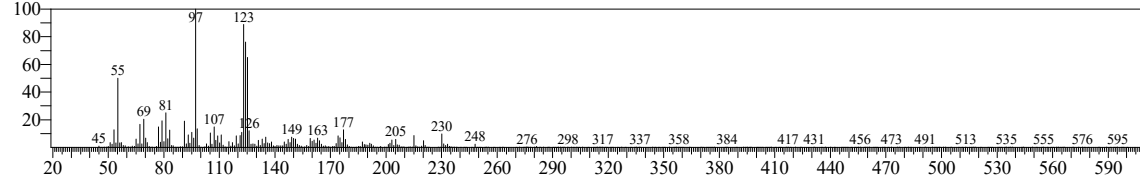

Hit#:1 Entry:93494 Library:NIST17.lib

SI:74 Formula:C13H18O3 CAS:80114-19-8 MolWeight:222 RetIndex:1465

CompName:3-Buten-2-one, 4-(2,5,5-trimethyl-3,8-dioxatricyclo[5.1.0.0(2,4)]oct-4-yl)-, [1.alpha.,2.alpha.,4.alpha.(E),7.alpha.]-

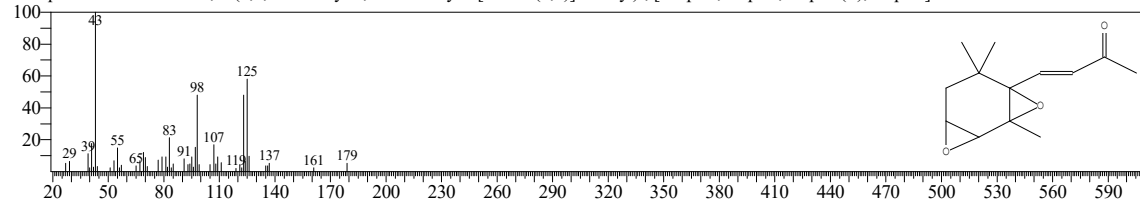

Hit#:2 Entry:264065 Library:W11N17MAIN1.lib

SI:74 Formula:C13H18O3 CAS:80114-19-8 MolWeight:222 RetIndex:1465

CompName:3-Buten-2-one, 4-(2,5,5-trimethyl-3,8-dioxatricyclo[5.1.0.0(2,4)]oct-4-yl)-, [1.alpha.,2.alpha.,4.alpha.(E),7.alpha.]-

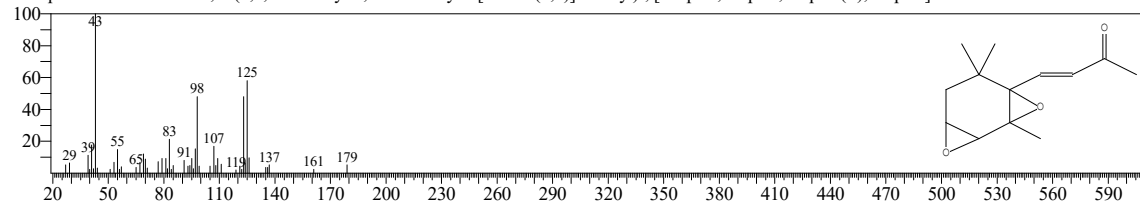

Hit#:3 Entry:355389 Library:W11N17MAIN1.lib

SI:72 Formula:C16H24O2 CAS:69926-83-6 MolWeight:248 RetIndex:2065

CompName:Cyclobuta[1,2:3,4]dicyclooctene-1,7(2H,6bH)-dione, dodecahydro-, (6a.alpha.,6b.alpha.,12a.alpha.,12b.beta.)-

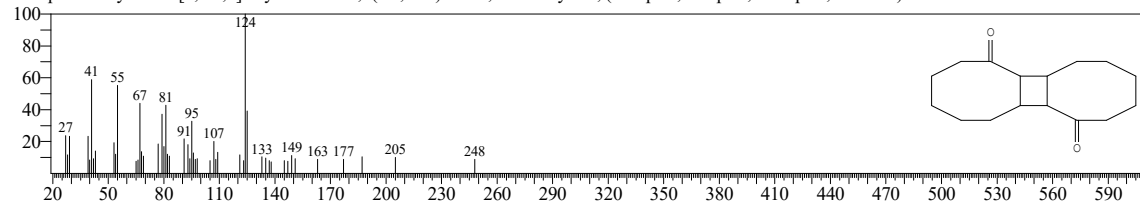

Hit#:4 Entry:120779 Library:NIST17.lib

SI:72 Formula:C16H24O2 CAS:69926-83-6 MolWeight:248 RetIndex:2065

CompName:Cyclobuta[1,2:3,4]dicyclooctene-1,7(2H,6bH)-dione, dodecahydro-, (6a.alpha.,6b.alpha.,12a.alpha.,12b.beta.)-

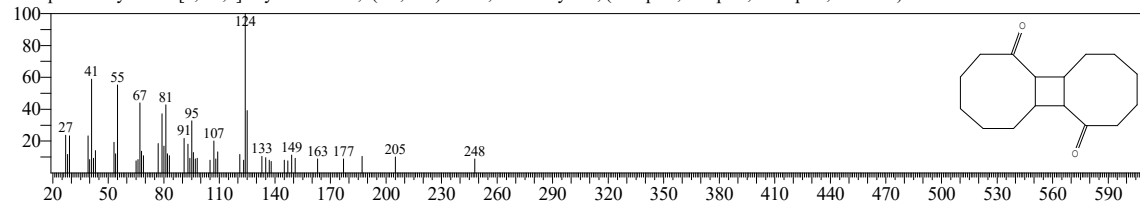

<< Target >>

Line#:68 R.Time:58.505(Scan#:11142) Retention Index:2236 MassPeaks:379

RawMode:Averaged 58.420-58.595(11125-11160) BasePeak:97.10(6507)

BG Mode:Calc. from Peak Group 1 - Event 1 Scan

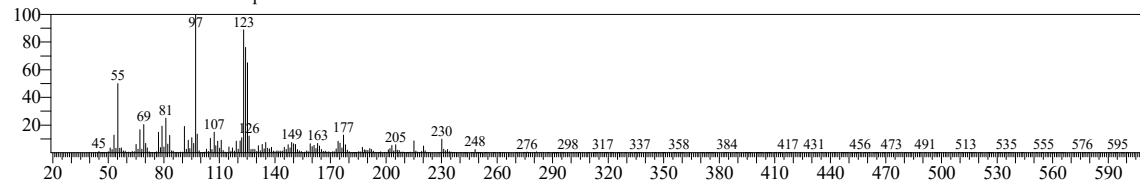

Hit#:5 Entry:355390 Library:W11N17MAIN1.lib

SI:72 Formula:C16H24O2 CAS:69926-83-6 MolWeight:248 RetIndex:2065

CompName:Cyclobuta[1,2:3,4]dicyclooctene-1,7(2H,6bH)-dione, dodecahydro-, (6a.alpha.,6b.alpha.,12a.alpha.,12b.beta.)-

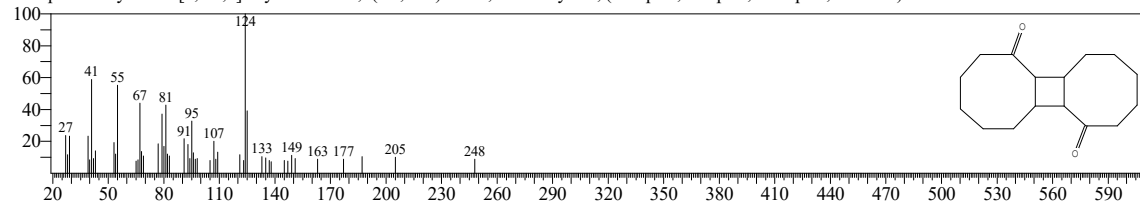

Hit#:6 Entry:312449 Library:W11N17MAIN1.lib

SI:72 Formula:C14H20O3 CAS:0-00-0 MolWeight:236 RetIndex:1746

CompName:5,6,6-Trimethyl-5-(3-oxobut-1-enyl)-1-oxaspiro[2.5]octan-4-one

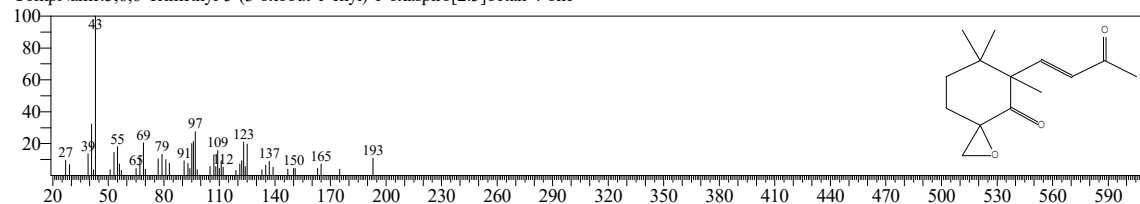

Hit#:7 Entry:102134 Library:W11N17MAIN1.lib

SI:72 Formula:C10H16O2 CAS:0-00-0 MolWeight:168 RetIndex:1011

CompName:(1R,2S,4S,5R,7R)-5-isopropyl-1-methyl-3,8-dioxatricyclo[5.1.0.02,4]octane

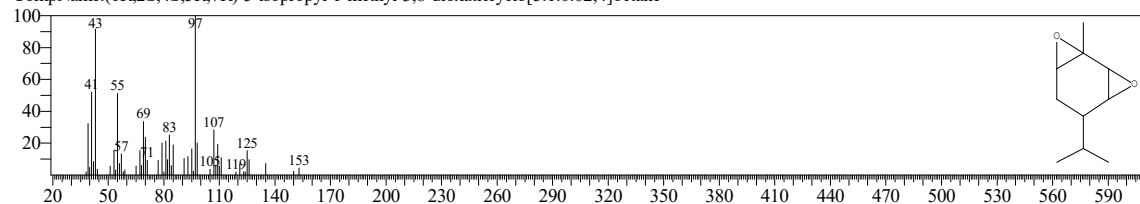

Hit#:8 Entry:108004 Library:NIST17.lib

SI:72 Formula:C14H20O3 CAS:0-00-0 MolWeight:236 RetIndex:1746

CompName:5,6,6-Trimethyl-5-(3-oxobut-1-enyl)-1-oxaspiro[2.5]octan-4-one

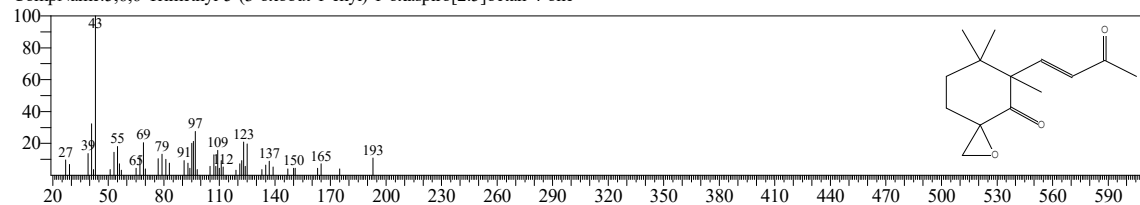

<< Target >>

Line#:68 R.Time:58.505(Scan#:11142) Retention Index:2236 MassPeaks:379

RawMode:Averaged 58.420-58.595(11125-11160) BasePeak:97.10(6507)

BG Mode:Calc. from Peak Group 1 - Event 1 Scan

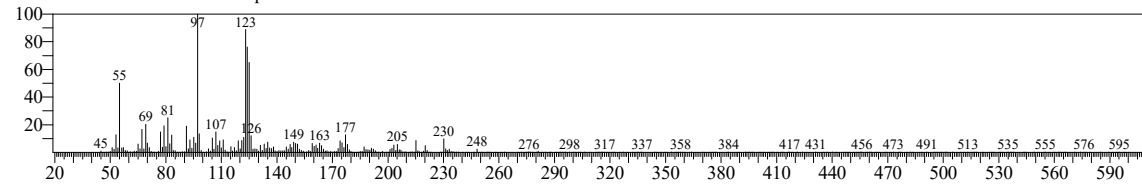

Hit#:9 Entry:41760 Library:NIST17.lib

SI:72 Formula:C10H16O2 CAS:0-00-0 MolWeight:168 RetIndex:1011

CompName:(1R,2S,4S,5R,7R)-5-isopropyl-1-methyl-3,8-dioxatricyclo[5.1.0.0.2,4]octane

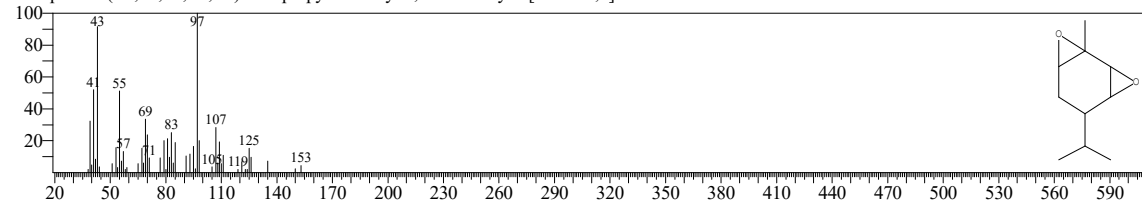

Hit#:10 Entry:93767 Library:NIST17.lib

SI:72 Formula:C14H22O2 CAS:97371-44-3 MolWeight:222 RetIndex:1518

CompName:3-Buten-2-one, 3-methyl-4-(1,3,3-trimethyl-7-oxabicyclo[4.1.0]heptan-1-yl)-

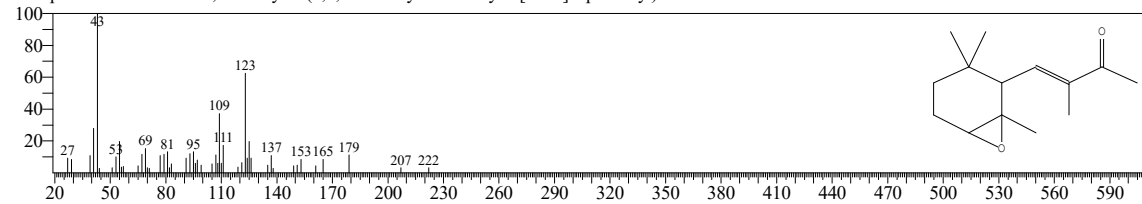

Supplement: d4ra03578j3.pdf [file d4ra03578j3.pdf]
