# Supplementary material for: GC-MS analysis, phytochemical composition of Hertia cheirifolia L. essential oil with pharmacological assessments: antioxidant, antibacterial, and antifungal activities
Source: Royal Society of Chemistry journal article supplement (doi:10.1039/d4ra03578j), 2024-01-01

**Technical platform of physico chemical analyses of Laghouat (TPPCA-CRAPC)**  
**Email: ptapc.laghouat@gmail.com**

Chromatogram HC W D:\Les prestation\Collaboration\Imad\Data 2\HC W.qgd

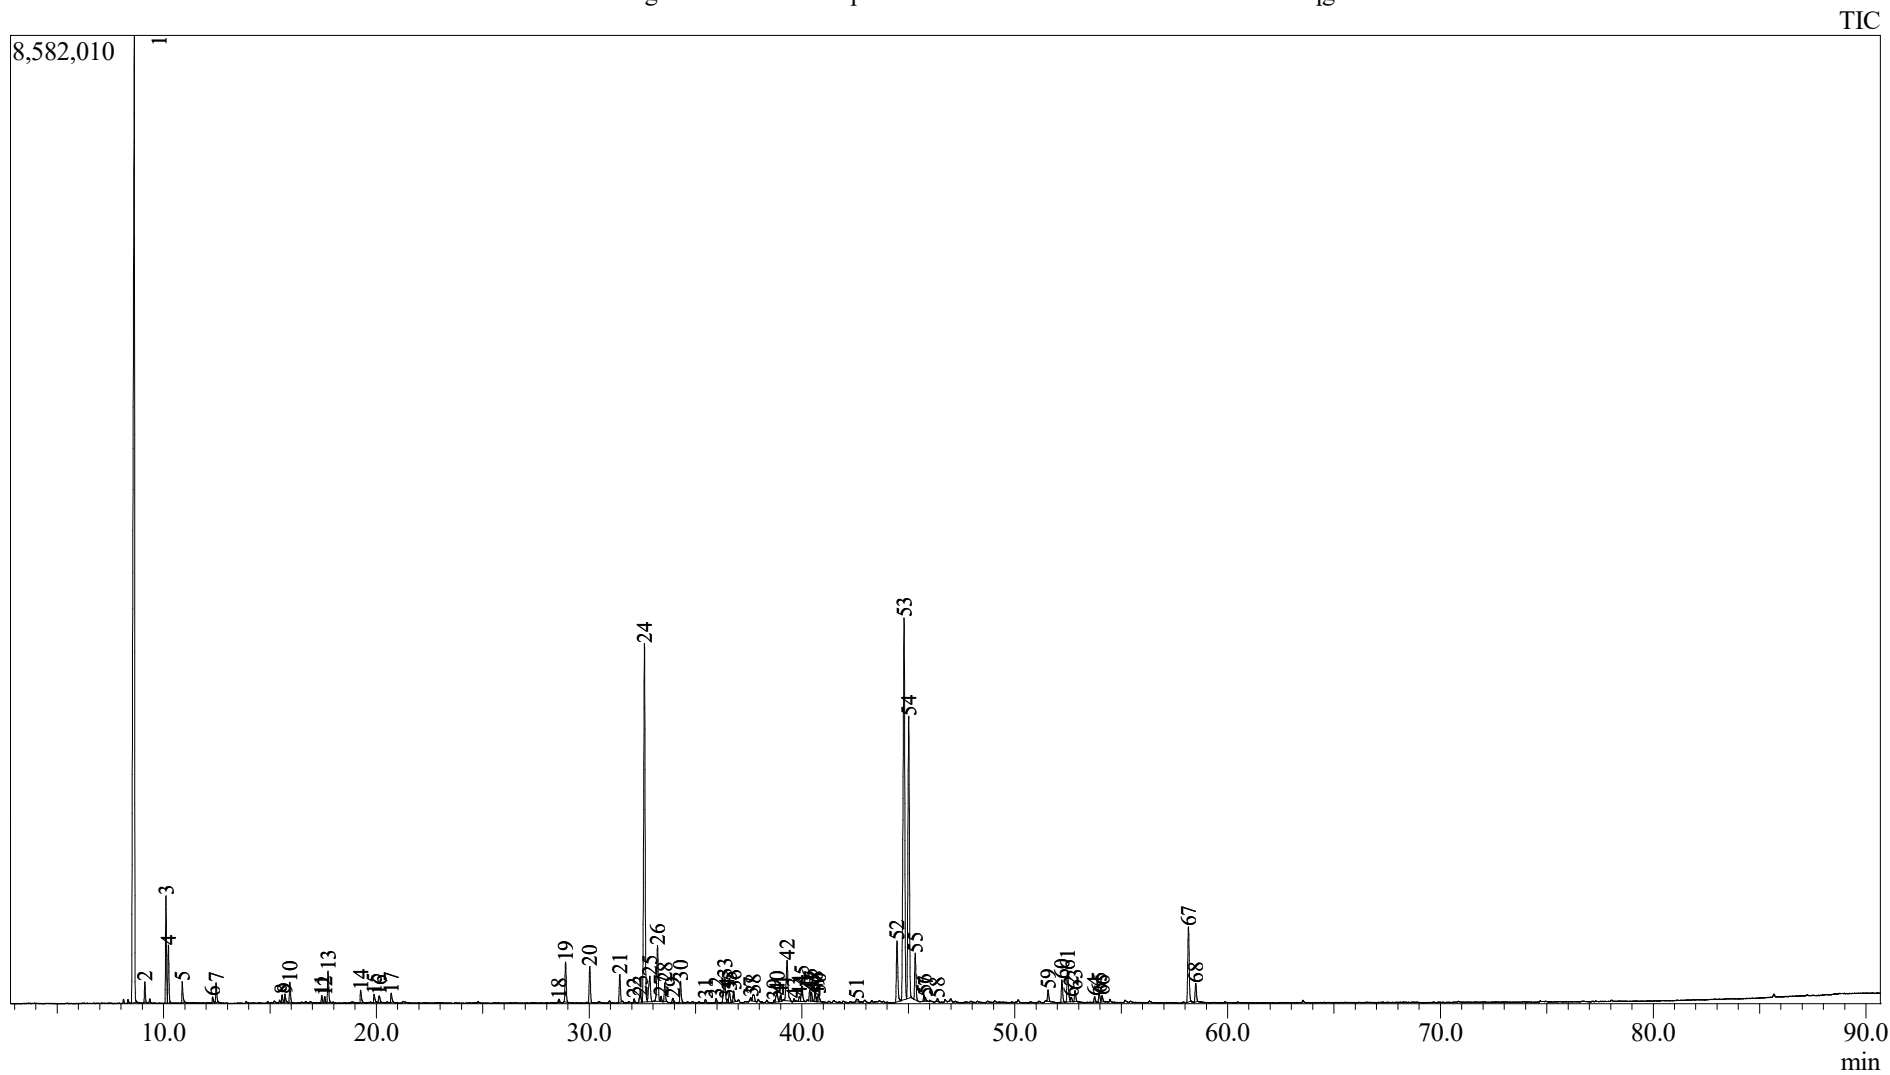

Supplement: d4ra03578j1.pdf [file d4ra03578j1.pdf]
