# Supplementary material for: GC-MS analysis, phytochemical composition of Hertia cheirifolia L. essential oil with pharmacological assessments: antioxidant, antibacterial, and antifungal activities
Source: Royal Society of Chemistry journal article supplement (doi:10.1039/d4ra03578j), 2024-01-01
Supplement: d4ra03578j4.pdf [file d4ra03578j4.pdf]

**Table S1.** Chemical composition of *H. cheirifolia* essential oil.

| Peak N <sup>o</sup> | RT            | RI          | <sup>a</sup> Components                                                                         | Area%        |
|---------------------|---------------|-------------|-------------------------------------------------------------------------------------------------|--------------|
| <b>1</b>            | <b>8.6250</b> | <b>927</b>  | <b><math>\alpha</math>-Pinene</b>                                                               | <b>32.59</b> |
| 2                   | 9.1190        | 939         | Camphene                                                                                        | 0.43         |
| <b>3</b>            | <b>10.114</b> | <b>964</b>  | <b>Sabinene</b>                                                                                 | <b>2.32</b>  |
| 4                   | 10.229        | 967         | $\beta$ -Pinene                                                                                 | 1.33         |
| 5                   | 10.875        | 984         | Myrcene                                                                                         | 0.45         |
| 6                   | 12.301        | 1017        | o-Cymene                                                                                        | 0.14         |
| 7                   | 12.465        | 1021        | Limonene                                                                                        | 0.45         |
| 8                   | 15.570        | 1090        | $\alpha$ -Pinene oxide                                                                          | 0.20         |
| 9                   | 15.704        | 1093        | Linalool                                                                                        | 0.17         |
| 10                  | 15.931        | 1098        | (1R)- <i>cis</i> -Verbenol                                                                      | 0.51         |
| 11                  | 17.435        | 1130        | <i>trans</i> -Pinocarveol                                                                       | 0.17         |
| 12                  | 17.573        | 1133        | (S)- <i>cis</i> -Verbenol                                                                       | 0.15         |
| 13                  | 17.727        | 1136        | Verbenol                                                                                        | 0.84         |
| 14                  | 19.259        | 1169        | Terpinen-4-ol                                                                                   | 0.32         |
| 15                  | 19.889        | 1183        | (1S)-1,3,3-trimethylnorbornan-2-ol                                                              | 0.23         |
| 16                  | 20.126        | 1188        | Myrtenal                                                                                        | 0.23         |
| 17                  | 20.697        | 1200        | Verbenone                                                                                       | 0.23         |
| 18                  | 28.580        | 1377        | Bicyclo[5.2.0]nonane, 4-methylene-2,8,8-trimethyl-2-vinyl-                                      | 0.09         |
| 19                  | 28.889        | 1385        | 1-Methyl-1-ethenyl-2,4-bis(1'-methylethenyl)cyclohexane                                         | 1.07         |
| 20                  | 30.026        | 1411        | Caryophyllene                                                                                   | 1.01         |
| 21                  | 31.440        | 1445        | $\alpha$ -Humulene                                                                              | 0.76         |
| 22                  | 32.110        | 1461        | (4S,4aR,6R)-4,4a-Dimethyl-6-(prop-1-en-2-yl)-1,2,3,4,4a,5,6,7-octahydronaphthalene              | 0.09         |
| 23                  | 32.395        | 1468        | $\beta$ -Guaiene                                                                                | 0.24         |
| <b>24</b>           | <b>32.595</b> | <b>1473</b> | <b>(-)-Germacrene D</b>                                                                         | <b>11.37</b> |
| 25                  | 32.851        | 1479        | Valencene                                                                                       | 1.05         |
| 26                  | 33.211        | 1488        | (1S,2E,6E,10R)-3,7,11,11-Tetramethylbicyclo[8.1.0]undeca-2,6-diene                              | 1.78         |
| 27                  | 33.375        | 1492        | $\alpha$ -Muurolole                                                                             | 0.14         |
| 28                  | 33.553        | 1496        | 1-Methyl-1-ethenyl-2,4-bis(1'-methylethenyl)cyclohexane                                         | 0.49         |
| 29                  | 33.926        | 1505        | Naphthalene, 1,2,4a,5,6,8a-hexahydro-4,7-dimethyl-1-(1-methylethyl)-                            | 0.14         |
| 30                  | 34.290        | 1515        | $\delta$ -Cadinene                                                                              | 0.60         |
| 31                  | 35.459        | 1545        | (1R,7S,E)-7-Isopropyl-4,10-dimethylenecyclodec-5-enol                                           | 0.08         |
| 32                  | 35.960        | 1558        | (1S,3aR,4R,8R,8aS)-1-Isopropyl-3a-methyl-7-methylenedecahydro-4,8-epoxyazulene                  | 0.10         |
| 33                  | 36.374        | 1568        | Spathulenol                                                                                     | 0.93         |
| 34                  | 36.480        | 1571        | 3,5-Dimethylcyclohex-1-ene-4-carboxaldehyde                                                     | 0.08         |
| 35                  | 36.590        | 1574        | 5-Oxatricyclo[8.2.0.0 <sup>4,6</sup> ]dodecane, 4,12,12-trimethyl-9-methylene-, (1R,4R,6R,10S)- | 0.65         |
| 36                  | 36.789        | 1579        | Caryophyllene oxide                                                                             | 0.30         |
| 37                  | 37.591        | 1600        | (1R,3E,7E,11R)-1,5,5,8-Tetramethyl-12-oxabicyclo[9.1.0]dodeca-3,7-diene                         | 0.08         |
| 38                  | 37.707        | 1603        | <i>cis</i> -(-)-2,4a,5,6,9a-Hexahydro-3,5,5,9-                                                  | 0.30         |

|           |               |             |                                                                                                                                                       |              |
|-----------|---------------|-------------|-------------------------------------------------------------------------------------------------------------------------------------------------------|--------------|
| 39        | 38.685        | 1629        | tetramethyl(1H)benzocycloheptene<br>1H-Cycloprop[e]azulen-7-ol, decahydro-1,1,7-<br>trimethyl-4-methylene-, [1ar-<br>(1a.α.,4a.α.,7.β.,7a.β.,7b.β.)]- | 0.05         |
| 40        | 38.828        | 1633        | <i>tau</i> -Cadinol                                                                                                                                   | 0.38         |
| 41        | 38.982        | 1637        | Aromadendrene oxide-(2)                                                                                                                               | 0.14         |
| 42        | 39.295        | 1646        | Seychellene                                                                                                                                           | 1.66         |
| 43        | 39.626        | 1655        | 6-Methyl-2-(4-methylcyclohex-3-en-1-<br>yl)hepta-1,5-dien-4-ol                                                                                        | 0.07         |
| 44        | 39.885        | 1661        | Bicyclo[5.3.0]decane, 2-methylene-5-(1-<br>methylvinyl)-8-methyl-                                                                                     | 0.15         |
| 45        | 39.991        | 1664        | 1,1,4,4-Tetramethyl-1,4-dihydro-2,3-<br>naphthalenedione                                                                                              | 0.52         |
| 46        | 40.366        | 1674        | Eudesma-4(15),7-dien-1.β-ol                                                                                                                           | 0.29         |
| 47        | 40.441        | 1676        | 2,5-di-tert-Butyl-1,4-benzoquinone                                                                                                                    | 0.24         |
| 48        | 40.607        | 1681        | Shyobunol                                                                                                                                             | 0.27         |
| 49        | 40.705        | 1684        | Aristolene                                                                                                                                            | 0.12         |
| 50        | 40.775        | 1685        | 2,3-Dihydro-3-methoxy-2-(2-methyl-1-<br>propenyl)-1H-inden-1-one                                                                                      | 0.26         |
| 51        | 42.569        | 1735        | (1R,7S,E)-7-Isopropyl-4,10-<br>dimethylenecyclodec-5-enol                                                                                             | 0.13         |
| 52        | 44.462        | 1789        | 9,10-Dimethyl-1,2,3,4,5,6,7,8-<br>octahydroanthracene                                                                                                 | 1.96         |
| <b>53</b> | <b>44.793</b> | <b>1798</b> | <b>2-(1-Cyclopent-1-enyl-1-<br/>methylethyl)cyclopentanone</b>                                                                                        | <b>14.62</b> |
| <b>54</b> | <b>45.018</b> | <b>1805</b> | <b>Bakkenolide A</b>                                                                                                                                  | <b>9.57</b>  |
| 55        | 45.322        | 1814        | Phenylthioaceticacid, 4-methoxyphenyl ester                                                                                                           | 1.33         |
| 56        | 45.730        | 1826        | Cyclopropane, 1-butyl-2,2-dimethyl-1-<br>phenylethynyl-                                                                                               | 0.17         |
| 57        | 45.800        | 1828        | Neophytadiene                                                                                                                                         | 0.08         |
| 58        | 46.361        | 1845        | Aromadendrene oxide-(2)                                                                                                                               | 0.09         |
| 59        | 51.561        | 2004        | 2-Cyclopenten-1-one,3- methoxy -4-methyl-                                                                                                             | 0.32         |
| 60        | 52.215        | 2025        | 6-Butyl-3-methoxy-2-cyclohexen-1-one                                                                                                                  | 0.64         |
| 61        | 52.473        | 2033        | 3-(1,1-Dimethylallyl)-6-hydroxycoumarin                                                                                                               | 1.07         |
| 62        | 52.646        | 2039        | Cycloprop[e]indene-1a,2(1H)-<br>dicarboxaldehyde, 3a,4,5,6,6a,6b-hexahydro-<br>5,5,6b-trimethyl-, (1α,3αβ,6αβ,6βα)-(+)-                               | 0.16         |
| 63        | 52.828        | 2045        | 2H-Cyclopropa[g]benzofuran, 4,5,5a,6,6a,6b-<br>hexahydro-4,4,6b-trimethyl-2-(1-<br>methylethenyl)-                                                    | 0.32         |
| 64        | 53.751        | 2075        | 12,13-Epoxy-3,4,7,15-tetrahydroxytrichothec-<br>9-en-8-one                                                                                            | 0.15         |
| 65        | 53.968        | 2082        | (+)-Pyrethronyl (+)-trans-chrysanthemate                                                                                                              | 0.27         |
| 66        | 54.096        | 2086        | 5H-Cyclopropa[a]naphthalen-5-one,<br>1,1a,2,3,6,7,7a,7b-octahydro-3-hydroxy-<br>1,1,7,7a-tetramethyl-                                                 | 0.19         |
| <b>67</b> | <b>58.160</b> | <b>2224</b> | <b>7-Oxabicyclo[4.1.0]heptan-3-ol, 6-(3-<br/>hydroxy-1-butenyl)-1,5,5-trimethyl-</b>                                                                  | <b>2.43</b>  |
| 68        | 58.503        | 2236        | 3-Buten-2-one, 4-(2,5,5-trimethyl-3,8-<br>dioxatricyclo[5.1.0.0(2,4)]oct-4-yl)-                                                                       | 0.55         |

|                |                                     |       |
|----------------|-------------------------------------|-------|
| Yield          |                                     | 0.20  |
| Total          |                                     | 100   |
| Monoterpenes   | Monoterpeneshydrocarbons (37.71%)   | 40.76 |
|                | Oxygenatedmonoterpenes (3.05 %)     |       |
| Sesquiterpenes | Sesquiterpeneshydrocarbons (21.06%) | 24.32 |
|                | Oxygenatedsesquiterpenes (3.26)     |       |
| Other          |                                     | 35.07 |

<sup>a</sup> Components are listed in order of their RI.

RI: Retention index.

RT: Retention time.
